# Supplementary material for: Electrochemically enabled nickel-catalyzed controllable synthesis of monoaryl or diaryl amines from aryl halides and trimethylsilyl azides
Source: Royal Society of Chemistry journal article supplement (doi:10.1039/d4gc06307d), 2025-01-01

# Supporting Information

## Electrochemically enabled Nickel-catalyzed controllable synthesis of monoaryl or diaryl amines from aryl halides and trimethylsilyl azides

Jiawei Huang<sup>a</sup>, Xiaoman Li<sup>a</sup>, Xue Zhao<sup>a</sup>, Liang Xu<sup>a\*</sup>, Yu Wei<sup>a\*</sup>

<sup>a</sup> School of Chemistry and Chemical Engineering/State Key Laboratory Incubation Base for Green Processing of Chemical Engineering, Shihezi University, Shihezi, China.

Yu wei, yuweichem@shzu.edu.cn; Liang Xu, xuliang4423@shzu.edu.cn.

### Table of Contents

|                                                                       |    |
|-----------------------------------------------------------------------|----|
| 1. General considerations .....                                       | 2  |
| 2. General procedure for amination of aryl halides .....              | 3  |
| 3. Optimization of nickel-catalyzed amination of aryl halides .....   | 4  |
| 4. Gram-scale experiment .....                                        | 13 |
| 5. Comparison of standard condition A and standard condition B .....  | 14 |
| 6. Unsuccessful substrate.....                                        | 15 |
| 7. General procedure for the synthesis of aryl bromide drugs .....    | 16 |
| 8. Characterization data of products .....                            | 18 |
| 9. Computational methods and details .....                            | 37 |
| 10. Cartesian coordinates and energies of calculated structures ..... | 38 |
| 11. Reference .....                                                   | 42 |
| 12. Copies of NMR spectra .....                                       | 44 |

## 1. General considerations

**General.** Unless otherwise noted, all reactions were carried out under an air atmosphere. Analytical thin-layer chromatography (TLC) was performed on glass plates coated with 0.25 mm 230–400 mesh silica gel containing a fluorescent indicator. Visualization was accomplished by exposure to a UV lamp. All the products in this article are compatible with standard silica gel chromatography. Column chromatography was performed on silica gel (200–300 mesh) using standard methods.

**Structural analysis.** NMR spectra were measured on a Bruker Ascend 400 spectrometer and chemical shifts ( $\delta$ ) are reported in parts per million (ppm).  $^1\text{H}$  NMR spectra were recorded at 400 MHz in NMR solvents and referenced internally to corresponding solvent resonance, and  $^{13}\text{C}$  NMR spectra were recorded at 101 MHz and referenced to corresponding solvent resonance. Coupling constants are reported in Hz with multiplicities denoted as s (singlet), d (doublet), t (triplet), q (quartet), m (multiplet) and br (broad). Infrared spectra were collected on a Thermo Fisher Nicolet 6700 FT-IR spectrometer using ATR (Attenuated Total Reflectance) method. Absorption maxima ( $\nu_{\text{max}}$ ) are reported in wavenumbers ( $\text{cm}^{-1}$ ). High resolution mass spectra (HRMS) were acquired on Thermo Scientific LTQ Orbitrap XL with an APCI or ESI source.

**Materials.** Commercial reagents and solvent were purchased from Adamas, J&K, Energy, Sigma-Aldrich, Alfa Aesar, Acros Organics, TCI and used as received unless otherwise stated.

## 2. General procedure for amination of aryl halides

### 2.1 General procedure A for generating monoaryl amines

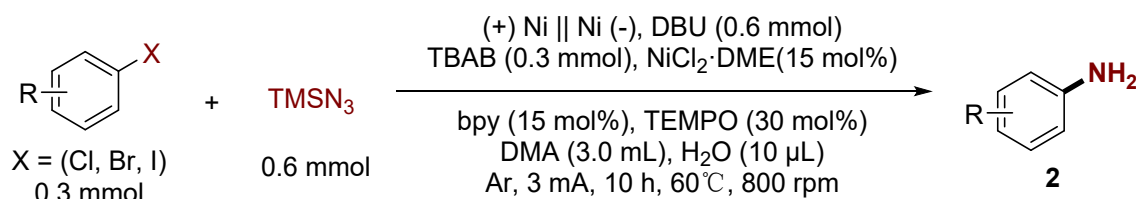

**General Procedure A:** aryl halides (0.30 mmol, 1.0 equiv.),  $\text{TMSN}_3$  (0.60 mmol, 2.0 equiv.),  $\text{NiCl}_2\cdot\text{DME}$  (0.045 mmol, 15 mol%), bpy (0.045 mmol, 15 mol%), DBU (0.60 mmol, 2.0 equiv.), TEMPO (30 mol%),  $\text{H}_2\text{O}$  (10.0  $\mu\text{L}$ ), TBAB (0.30 mmol, 1.0 equiv.) and DMA (3.0 mL) were added to a dried 25 mL reaction tube, and electrolyze with Ni as anode and cathode at a constant current of 3 mA for 10 hours in an Ar atmosphere at 60 °C. After the reaction, the reaction mixture was diluted with 15 mL of water and then extracted with ethyl acetate ( $3 \times 15$  mL). The combined organic phases were dried over  $\text{Na}_2\text{SO}_4$  and concentrated under vacuum to yield the crude product, which was subsequently purified by column chromatography on silica gel using a PE/EA (2:1) mixture as the eluent to obtain the desired products.

### 2.2 General procedure B for generating diaryl amines

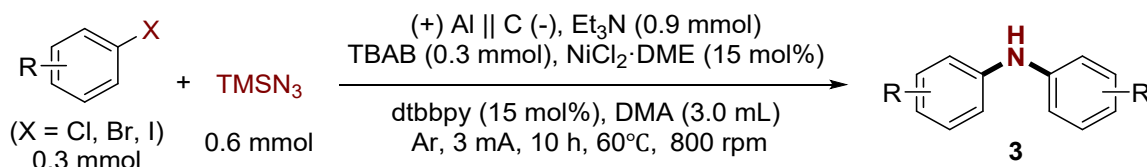

**General Procedure B:** aryl halides (0.30 mmol, 1.0 equiv.),  $\text{TMSN}_3$  (0.60 mmol, 2.0 equiv.),  $\text{NiCl}_2\cdot\text{DME}$  (0.045 mmol, 15 mol%), dtbbpy (0.045 mmol, 15 mol%), TEA (0.90 mmol, 3.0 equiv.), TBAB (0.30 mmol, 1.0 equiv.) and DMA (3.0 mL) were added to a dried 25 mL reaction tube, and electrolyze with Al as anode and Carbon as cathode at a constant current of 3 mA for 10 hours in an Ar atmosphere at 60 °C. After the reaction, the reaction mixture was diluted with 15 mL of water and then extracted with ethyl acetate ( $3 \times 15$  mL). The combined organic phases were dried over  $\text{Na}_2\text{SO}_4$  and concentrated under vacuum to yield the crude product, which was subsequently purified by column chromatography on silica gel using a PE/EA (5:1) mixture as the eluent to obtain the desired products.

### 3. Optimization of nickel-catalyzed amination of aryl halides

#### 3.1 Optimization of solvent (Table SI-1)

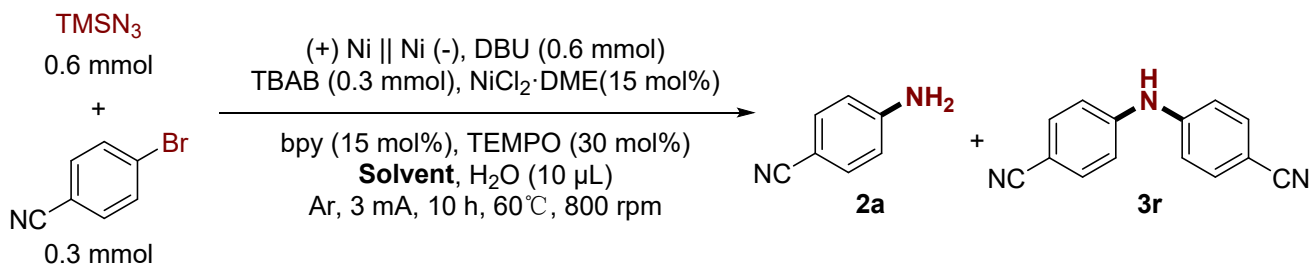

| Entry | Solvent (3.0 mL) | 2a (%) | 3r (%) |
|-------|------------------|--------|--------|
| 1     | DMA              | 70     | 10     |
| 2     | DMF              | 52     | trace  |
| 3     | MeCN             | 30     | trace  |
| 4     | DMSO             | 18     | trace  |
| 5     | MeOH             | trace  | trace  |
| 6     | DCM              | trace  | trace  |

Reaction conditions: 4-Bromobenzonitrile (1.0 equiv., 0.3 mmol), TMSN<sub>3</sub> (2.0 equiv., 0.6 mmol), NiCl<sub>2</sub>·DME (15.0 mol%), bpy (15.0 mol%), DBU (2.0 equiv., 0.6 mmol), TBAB (1.0 equiv., 0.3 mmol), TEMPO (30 mol%), H<sub>2</sub>O (10.0 µL), Solvent, Ar, 60°C, 800 rpm, Ni as Anode and cathode at 3 mA for 10h, isolated yields are shown.

### 3.2 Optimization of base (Table SI-2)

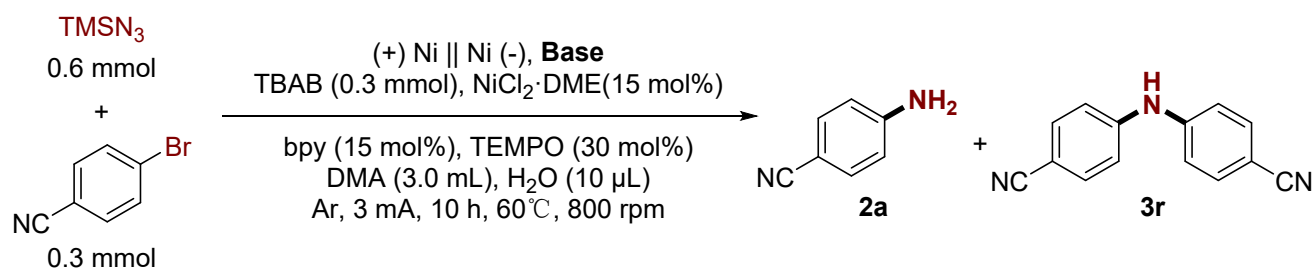

| Entry | Base (2.0 equiv.)                | <b>2a</b> (%) | <b>3r</b> (%) |
|-------|----------------------------------|---------------|---------------|
| 1     | <b>DBU</b>                       | <b>70</b>     | <b>10</b>     |
| 2     | MTBD                             | 53            | 13            |
| 3     | TBD                              | 33            | 19            |
| 4     | DBN                              | 48            | 7             |
| 4     | TMG                              | 62            | 15            |
| 5     | CsCO <sub>3</sub>                | trace         | trace         |
| 6     | NaH <sub>2</sub> PO <sub>4</sub> | 19            | 11            |
| 7     | <sup>t</sup> BuOK                | trace         | trace         |
| 8     | TMEDA                            | 24            | 22            |
| 9     | DIPEA                            | 27            | 14            |
| 10    | DIPA                             | 22            | 8             |
| 2     | Et <sub>3</sub> N                | 27            | 27            |

Reaction conditions: 4-Bromobenzonitrile (1.0 equiv., 0.3 mmol), TMSN<sub>3</sub> (2.0 equiv., 0.6 mmol), NiCl<sub>2</sub>·DME (15.0 mol%), bpy (15.0 mol%), Base, TBAB (1.0 equiv., 0.3 mmol), TEMPO (30 mol%), H<sub>2</sub>O (10.0 μL), DMA (3.0 mL), Ar, 60°C, 800 rpm, Ni as Anode and cathode at 3 mA for 10h, isolated yields are shown.

### 3.3 Optimization of temperature (Table SI-3)

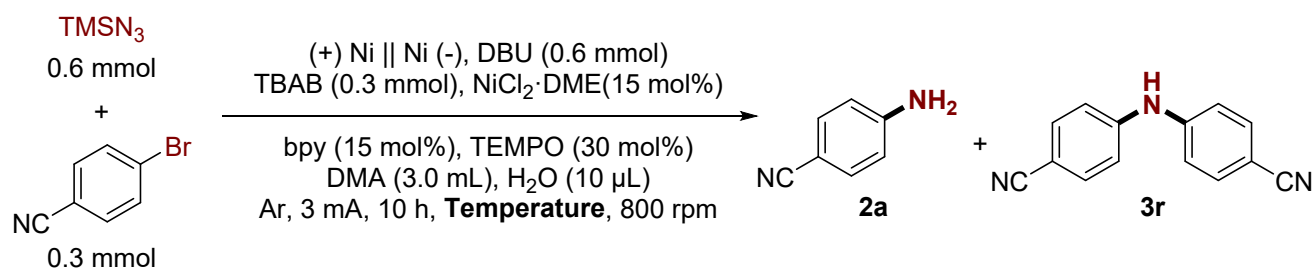

| Entry    | Temperature  | <b>2a</b> (%) | <b>3r</b> (%) |
|----------|--------------|---------------|---------------|
| <b>1</b> | <b>60 °C</b> | <b>70</b>     | <b>10</b>     |
| 2        | 25 °C        | 43            | 2             |
| 4        | 40 °C        | 55            | 13            |
| 5        | 80 °C        | 66            | 11            |

Reaction conditions: 4-Bromobenzonitrile (1.0 equiv., 0.3 mmol),  $\text{TMSN}_3$  (2.0 equiv., 0.6 mmol),  $\text{NiCl}_2 \cdot \text{DME}$  (15.0 mol%), bpy (15.0 mol%), DBU (2.0 equiv., 0.6 mmol), TBAB (1.0 equiv., 0.3 mmol), TEMPO (30 mol%),  $\text{H}_2\text{O}$  (10.0  $\mu\text{L}$ ), DMA (3.0 mL), Ar, Temperature, 800 rpm, Ni as Anode and cathode at 3 mA for 10h, isolated yields are shown.

### 3.4 Optimization of [Ni] Source (Table SI-4)

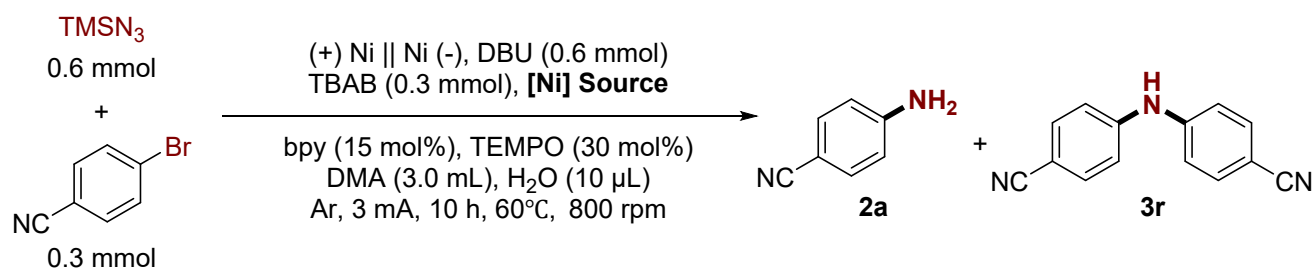

| Entry | [Ni] source (15 mol%)                | 2a (%) | 3r (%) |
|-------|--------------------------------------|--------|--------|
| 1     | NiCl <sub>2</sub> ·DME               | 70     | 10     |
| 2     | NiBr <sub>2</sub> ·DME               | 64     | 6      |
| 3     | NiBr <sub>2</sub>                    | 43     | Trace  |
| 4     | NiCl <sub>2</sub>                    | 40     | Trace  |
| 5     | NiI <sub>2</sub>                     | 28     | Trace  |
| 6     | NiCl <sub>2</sub> ·2PCy <sub>3</sub> | 36     | Trace  |
| 7     | NiCl <sub>2</sub> ·2PPh <sub>3</sub> | 27     | Trace  |

Reaction conditions: 4-Bromobenzonitrile (1.0 equiv., 0.3 mmol), TMSN<sub>3</sub> (2.0 equiv., 0.6 mmol), [Ni] Source (15.0 mol%), bpy (15.0 mol%), DBU (2.0 equiv., 0.6 mmol), TBAB (1.0 equiv., 0.3 mmol), TEMPO (30 mol%), H<sub>2</sub>O (10.0 µL), DMA (3.0 mL), Ar, 60°C, 800 rpm, Ni as Anode and cathode at 3 mA for 10h, isolated yields are shown.

### 3.5 Optimization of ligand (Table SI-5)

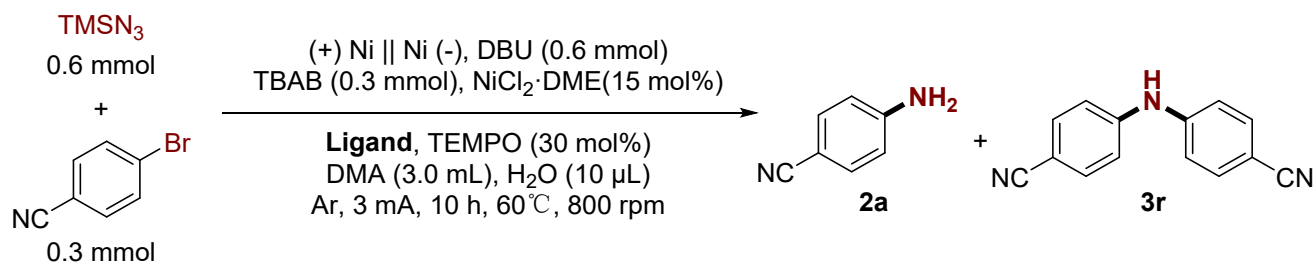

| Entry | Ligand (15 mol%) | 2a (%) | 3r (%) |
|-------|------------------|--------|--------|
| 1     | L1               | 70     | 10     |
| 2     | L2               | 53     | 15     |
| 3     | L3               | 50     | 12     |
| 4     | L4               | 39     | 12     |
| 5     | L5               | 33     | 14     |
| 6     | L6               | 34     | 17     |
| 7     | L7               | 48     | 15     |
| 8     | L8               | 27     | 16     |
| 9     | L9               | 41     | trace  |
| 10    | L10              | 38     | trace  |
| 11    | L11              | 66     | trace  |
| 12    | L12              | 62     | 8      |

Reaction conditions: 4-Bromobenzonitrile (1.0 equiv., 0.3 mmol), TMSN<sub>3</sub> (2.0 equiv., 0.6 mmol), NiCl<sub>2</sub>·DME (15.0 mol%), Ligand, DBU (2.0 equiv., 0.6 mmol), TBAB (1.0 equiv., 0.3 mmol), TEMPO (30 mol%), H<sub>2</sub>O (10.0 μL), DMA (3.0 mL), Ar, 60°C, 800 rpm, Ni as Anode and cathode at 3 mA for 10h, isolated yields are shown.

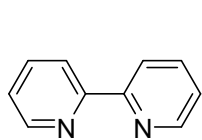

L1

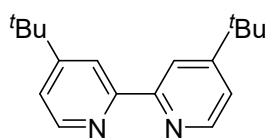

L2

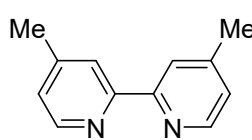

L3

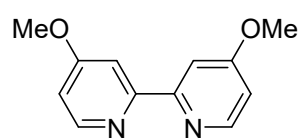

L4

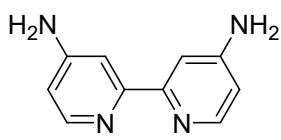

L5

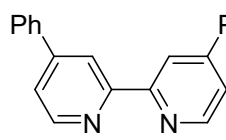

L6

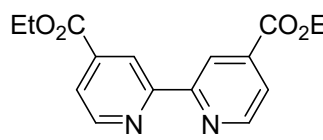

L7

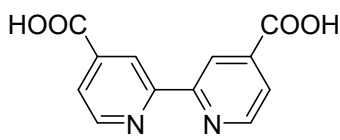

L8

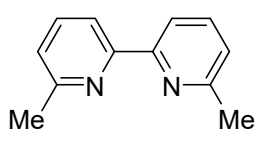

L9

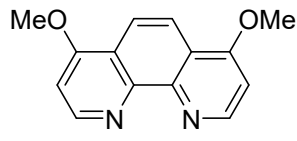

L10

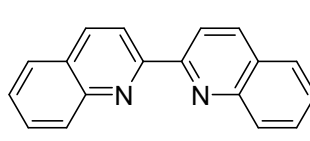

L11

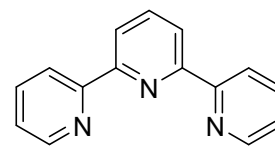

L12

### 3.6 Optimization of electrodes (Table SI-6)

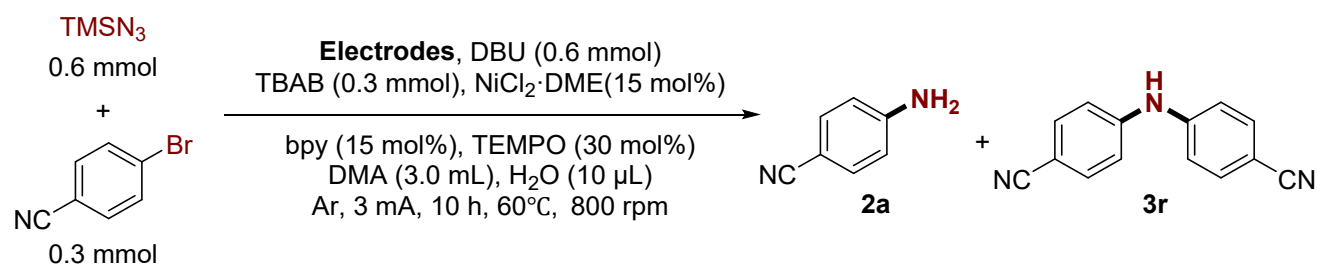

| Entry    | Electrodes              | <b>2a</b> (%) | <b>3r</b> (%) |
|----------|-------------------------|---------------|---------------|
| <b>1</b> | <b>(+) Ni    Ni (-)</b> | <b>70</b>     | <b>10</b>     |
| 2        | (+) Ni    C (-)         | 63            | 12            |
| 3        | (+) Al    C (-)         | 23            | 23            |
| 4        | (+) Al    Ni (-)        | 27            | 14            |
| 5        | (+) Fe    C (-)         | 31            | 11            |
| 6        | (+) SS    C (-)         | 42            | 4             |
| 7        | (+) Zn    C (-)         | 16            | 24            |

Reaction conditions: 4-Bromobenzonitrile (1.0 equiv., 0.3 mmol), TMSN<sub>3</sub> (2.0 equiv., 0.6 mmol), NiCl<sub>2</sub>·DME (15.0 mol%), bpy (15.0 mol%), DBU (2.0 equiv., 0.6 mmol), TBAB (1.0 equiv., 0.3 mmol), TEMPO (30 mol%), H<sub>2</sub>O (10.0 µL), DMA (3.0 mL), Ar, 60°C, 800 rpm, Electrodes at 3 mA for 10h, isolated yields are shown.

### 3.7 Optimization of electrolyte (Table SI-7)

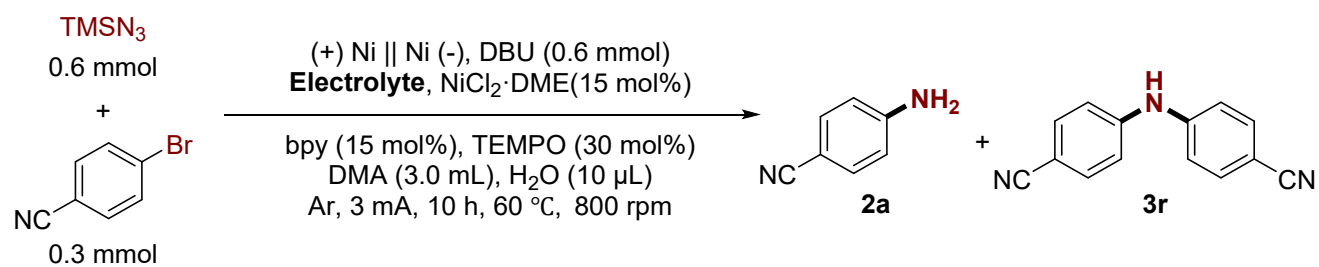

| Entry | Temperature (0.1 M)                       | 2a (%)    | 3r (%)    |
|-------|-------------------------------------------|-----------|-----------|
| 1     | <b>TBAB</b>                               | <b>70</b> | <b>10</b> |
| 2     | TBAI                                      | 43        | 6         |
| 4     | TBACl                                     | 31        | trace     |
| 5     | NaI                                       | 33        | trace     |
| 6     | NaCl                                      | 24        | trace     |
| 7     | LiBr                                      | 50        | 10        |
| 8     | <i>n</i> Bu <sub>4</sub> NPF <sub>6</sub> | 54        | 7         |

Reaction conditions: 4-Bromobenzonitrile (1.0 equiv., 0.3 mmol), TMSN<sub>3</sub> (2.0 equiv., 0.6 mmol), NiCl<sub>2</sub>·DME (15.0 mol%), bpy (15.0 mol%), DBU (2.0 equiv., 0.6 mmol), electrolyte, TEMPO (30 mol%), H<sub>2</sub>O (10.0 µL), DMA (3.0 mL), Ar, 60°C, 800 rpm, Ni as Anode and cathode at 3 mA for 10h, isolated yields are shown.

### 3.8 Optimization of additive (Table SI-8)

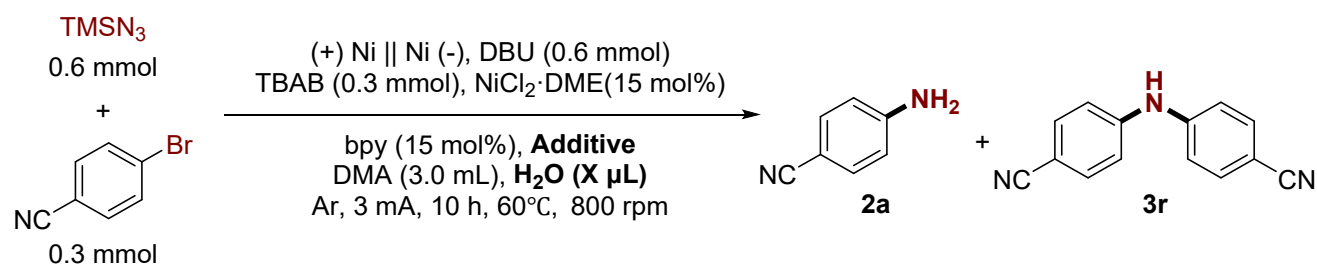

| Entry | Additive                                       | 2a (%)    | 3r (%)    |
|-------|------------------------------------------------|-----------|-----------|
| 1     | <b>TEMPO (30 mol%), H<sub>2</sub>O (10 μL)</b> | <b>70</b> | <b>10</b> |
| 3     | TEMPO (20 mol%), H <sub>2</sub> O (10 μL)      | 61        | 13        |
| 4     | TEMPO (40 mol%), H <sub>2</sub> O (10 μL)      | 57        | 11        |
| 5     | TEMPO (50 mol%), H <sub>2</sub> O (10 μL)      | 39        | 4         |
| 6     | TEMPO (100 mol%), H <sub>2</sub> O (10 μL)     | 22        | Trace     |
| 7     | TEMPO (0 mol%), H <sub>2</sub> O (10 μL)       | 50        | 17        |
| 8     | TEMPO (30 mol%), H <sub>2</sub> O (0 μL)       | 58        | 16        |
| 9     | TEMPO (30 mol%), H <sub>2</sub> O (20 μL)      | 68        | 7         |
| 10    | TEMPO (30 mol%), H <sub>2</sub> O (30 μL)      | 62        | 8         |
| 11    | TEMPO (30 mol%), H <sub>2</sub> O (50 μL)      | 49        | 6         |
| 12    | Without TEMPO and H <sub>2</sub> O             | 44        | 18        |

Reaction conditions: 4-Bromobenzonitrile (1.0 equiv., 0.3 mmol), TMSN<sub>3</sub> (2.0 equiv., 0.6 mmol), NiCl<sub>2</sub>·DME (15.0 mol%), bpy (15.0 mol%), DBU (2.0 equiv., 0.6 mmol), TBAB (1.0 equiv., 0.3 mmol), Additive, H<sub>2</sub>O (10.0 μL), DMA (3.0 mL), Ar, Temperature, 800 rpm, Ni as Anode and cathode at 3 mA for 10h, isolated yields are shown.

### 3.9 Optimization of diaryl amination

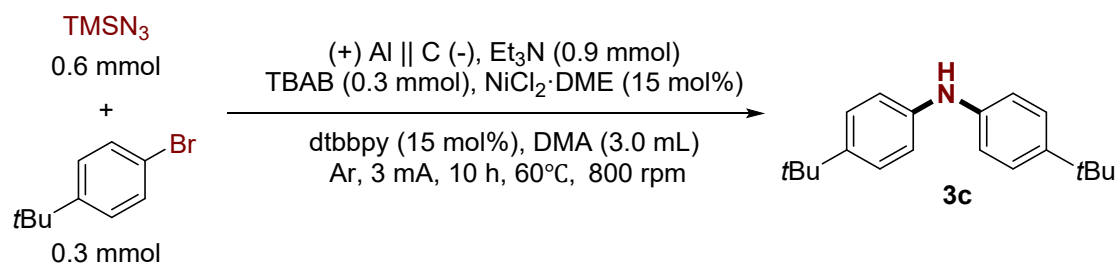

| Entry    | Variations from the 'standard' conditions | Yield <b>3c</b> (%) |
|----------|-------------------------------------------|---------------------|
| <b>1</b> | <b>None</b>                               | <b>76</b>           |
| 2        | Without electrolysis                      | N.R. <sup>[b]</sup> |
| 3        | Without dtbbpy                            | Trace               |
| 4        | Without Et <sub>3</sub> N                 | Trace               |
| 5        | without NiCl <sub>2</sub> ·DME            | Trace               |
| 6        | DMF instead of DMA                        | 66                  |
| 7        | MeCN instead of DMA                       | 33                  |
| 8        | DBU instead of Et <sub>3</sub> N          | 55                  |
| 9        | TMG instead of DBU                        | 42                  |
| 10       | (+) Ni    C (-) as electrodes             | 60                  |
| 11       | (+) Al    Pt (-) as electrodes            | 27                  |

Standard conditions B: aryl halides (1.0 equiv., 0.3 mmol), TMSN<sub>3</sub> (2.0 equiv., 0.6 mmol), Al (+)|| C (-), NiCl<sub>2</sub>·DME (15.0 mol%, 0.045 mmol), dtbbpy (15.0 mol%, 0.045 mmol), TBAB (1.0 equiv., 0.3 mmol), Et<sub>3</sub>N (3.0 equiv., 0.9 mmol), DMA (3.0 mL), 800 rpm, 60°C, constant current = 3 mA in Ar for 10h (3.7 F/mol), isolated yields are shown and in an undivided cell.

## 4. Gram-scale experiment

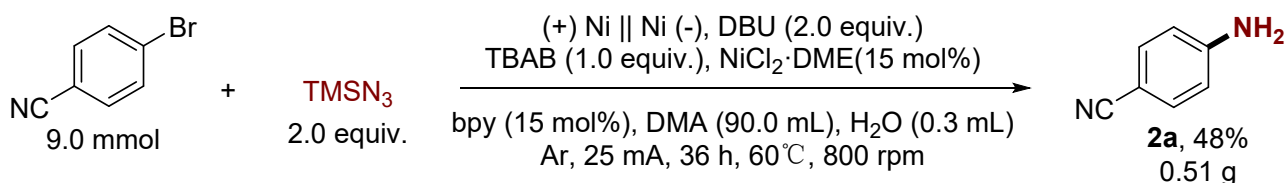

4-Bromobenzonitrile (9.0 mmol, 1.0 equiv.),  $\text{TMSN}_3$  (18.0 mmol, 2.0 equiv.),  $\text{NiCl}_2 \cdot \text{DME}$  (1.35 mmol, 15 mol%), bpy (1.35 mmol, 15 mol%), DBU (18.0 mmol, 2.0 equiv.),  $\text{H}_2\text{O}$  (0.3 mL), TBAB (9.0 mmol, 1.0 equiv.) and DMA (90.0 mL) were added to a dried 250 mL reaction tube, and electrolyze with Ni as anode and cathode at a constant current of 25 mA for 36 hours in an Ar atmosphere at 60 °C. After the reaction, the reaction mixture was diluted with 200 mL of water and then extracted with ethyl acetate (3 × 200 mL). The combined organic phases were dried over  $\text{Na}_2\text{SO}_4$  and concentrated under vacuum to yield the crude product, which was subsequently purified by column chromatography on silica gel using a PE/EA (2:1) mixture as the eluent to afford **2a** (0.51 g) with a yield of 48%.

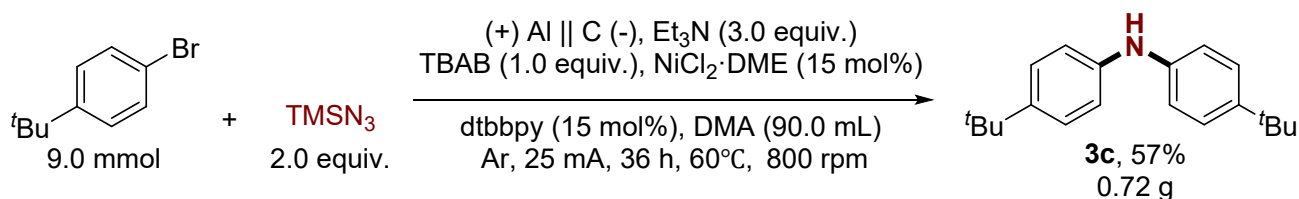

1-Bromo-4-(tert-butyl)benzene (9.0 mmol, 1.0 equiv.),  $\text{TMSN}_3$  (18.0 mmol, 2.0 equiv.),  $\text{NiCl}_2 \cdot \text{DME}$  (1.35 mmol, 15 mol%), dtbbpy (1.35 mmol, 15 mol%), TEA (27.0 mmol, 3.0 equiv.), TBAB (9.0 mmol, 1.0 equiv.) and DMA (90.0 mL) were added to a dried 250 mL reaction tube, and electrolyze with Al as anode and Carbon as cathode at a constant current of 25 mA for 36 hours in an Ar atmosphere at 60 °C. After the reaction, the reaction mixture was diluted with 200 mL of water and then extracted with ethyl acetate (3 × 200 mL). The combined organic phases were dried over  $\text{Na}_2\text{SO}_4$  and concentrated under vacuum to yield the crude product, which was subsequently purified by column chromatography on silica gel using a PE/EA (5:1) mixture as the eluent to afford **3a** (0.72 g) with a yield of 57%.

## 5. Comparison of standard condition A and standard condition B

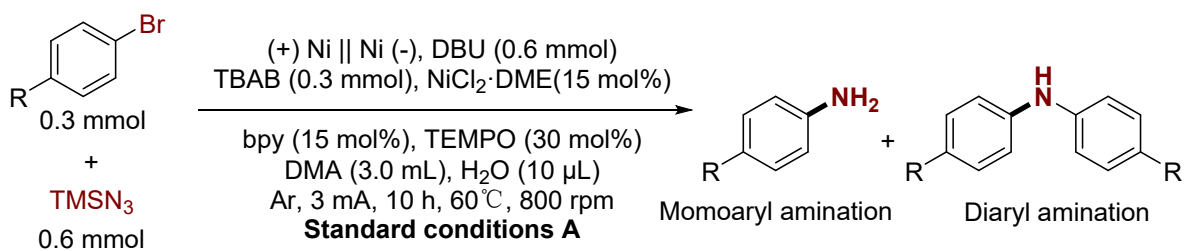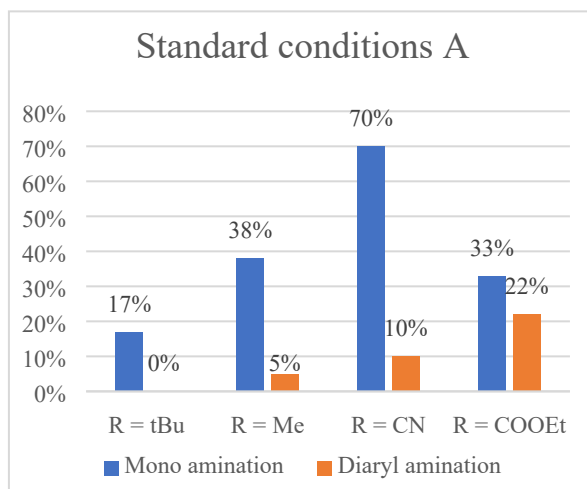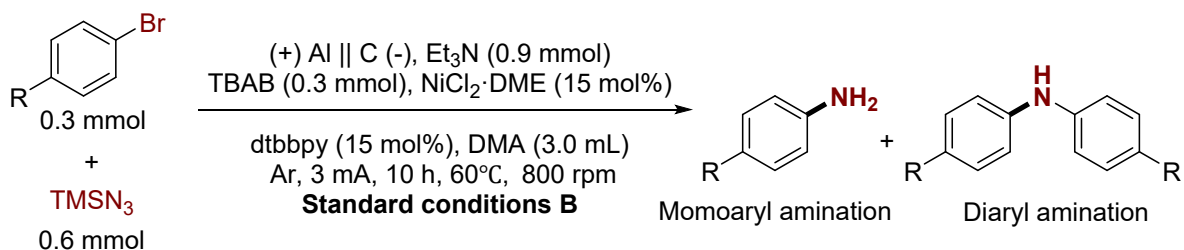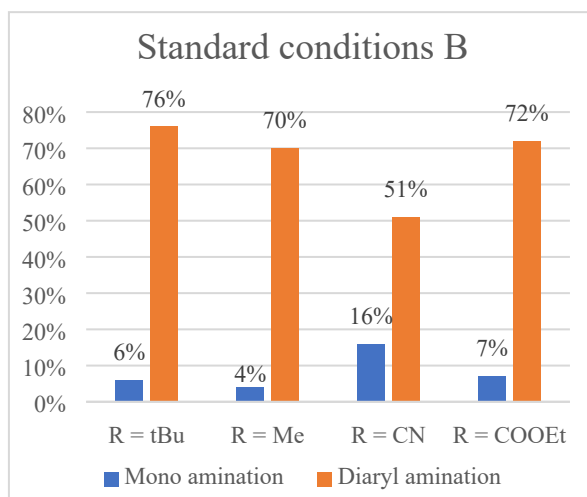

## 6. Unsuccessful substrate

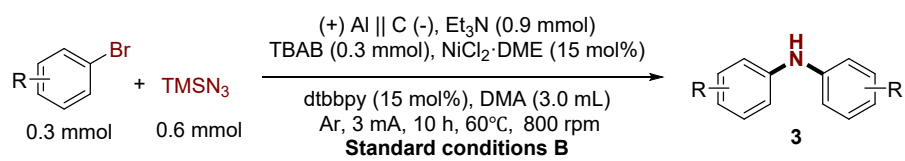

unsuccessful examples

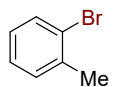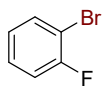

## 7. General procedure for the synthesis of aryl bromide drugs

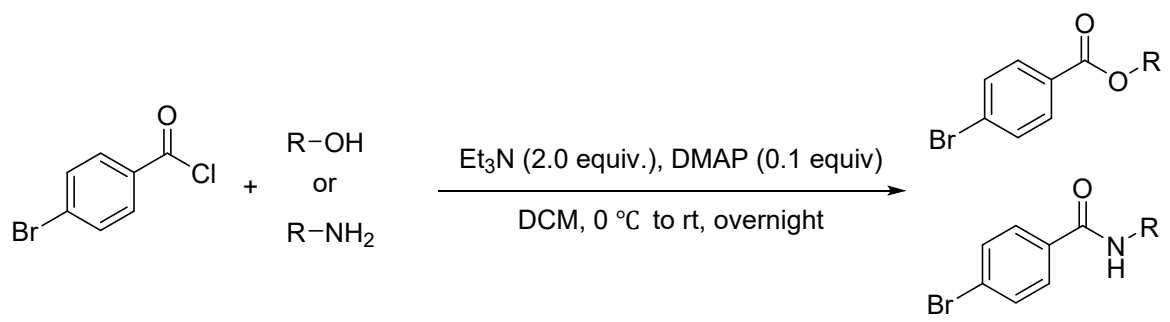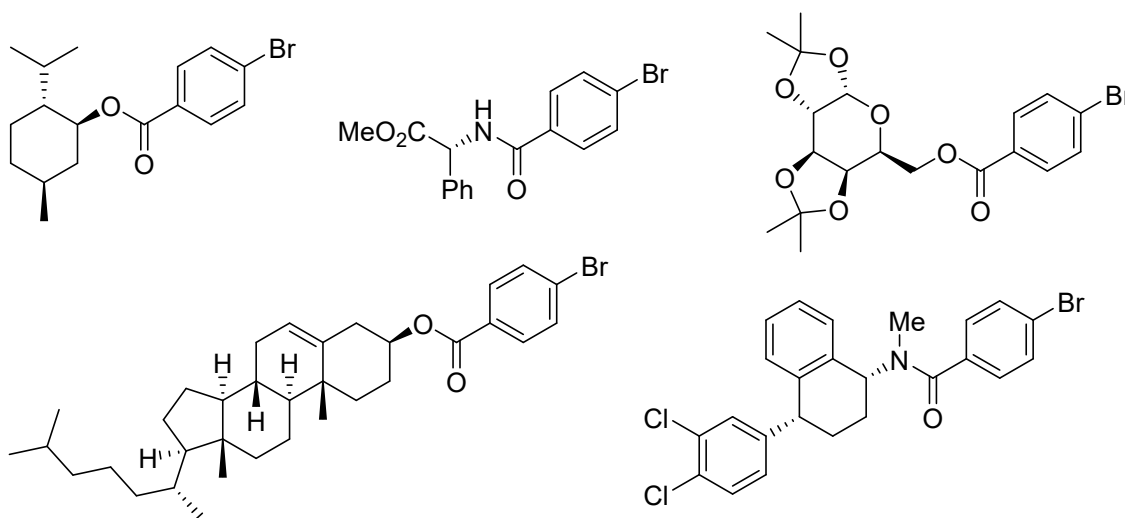

To a solution of alcohol or amine (5.0 mmol, 1.0 equiv.), DMAP (0.5 mmol, 0.1 equiv.) and  $\text{Et}_3\text{N}$  (10 mmol, 2.0 equiv.) in DCM (10.0 mL) was added the solution of 4-bromobenzoylchloride (5.0 mmol, 1.0 equiv.) in DCM (10.0 mL) dropwise using syringe at 0 °C. After stirring for 30 minutes, the mixture was allowed to stir at room temperature overnight. Then the mixture was diluted with saturated  $\text{NH}_4\text{Cl}$  solution (20 mL), and extracted with DCM (3  $\times$  10 mL). The organic layer was washed with brine, dried over  $\text{MgSO}_4$  and evaporated. The residue was purified with flash column chromatography to give the desired aryl bromide.<sup>1</sup>

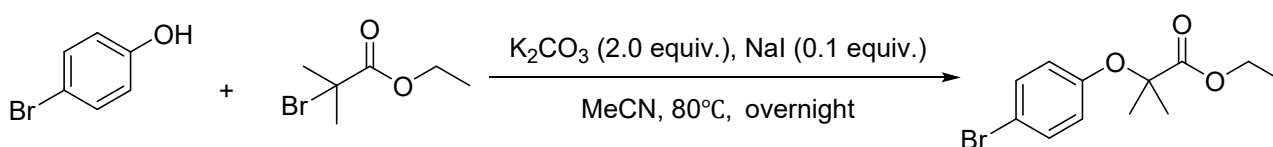

To a solution of 4-bromophenol (5.78 mmol, 1 equiv.), ethyl 2-bromoisobutyrate (5.78 mmol, 1 equiv.),  $\text{K}_2\text{CO}_3$  (11.56 mmol, 2 equiv.) and  $\text{NaI}$  (0.58 mmol, 0.1 equiv.) in MeCN (30.0 mL) was heated at 80 °C overnight. The solvent was removed and the residue was partitioned between EtOAc and  $\text{H}_2\text{O}$ . The organic layer was washed with brine, dried over  $\text{MgSO}_4$  and evaporated. The residue was purified with flash column chromatography to give the desired aryl bromide.<sup>2</sup>

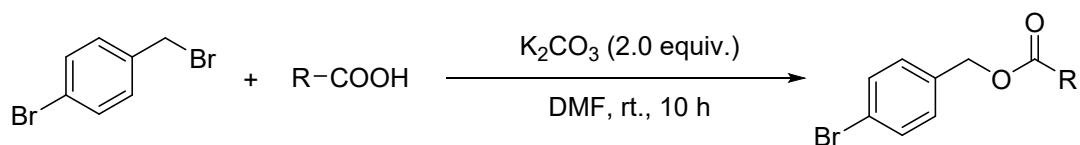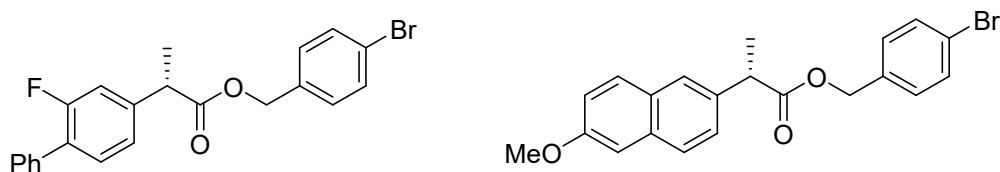

To carboxylic acid (1.5 mmol) in DMF (10.0 mL) was added  $K_2CO_3$  (2.0 mmol) and 4-bromobenzyl bromide (1.0 mmol). The resulting mixture was stirred at room temperature for 10 h, after which time the reaction mixture was diluted with  $H_2O$  and extracted with EtOAc ( $3 \times 10$  mL). The organic layer was washed with brine, dried over  $MgSO_4$  and evaporated. The residue was purified with flash column chromatography to give the desired aryl bromide.<sup>3</sup>

## 8. Characterization data of products

Preparation and Characterization Data for Isolated Products. **2a**,<sup>4</sup> **2b**,<sup>4</sup> **2c**,<sup>5</sup> **2d**,<sup>4</sup> **2e**,<sup>6</sup> **2f**,<sup>7</sup> **2g**,<sup>8</sup> **2h**,<sup>7</sup> **2i**,<sup>6</sup> **2j**,<sup>9</sup> **2k**,<sup>8</sup> **2l**,<sup>7</sup> **2m**,<sup>10</sup> **2n**,<sup>4</sup> **2o**,<sup>11</sup> **2p**,<sup>12</sup> **2q**,<sup>13</sup> **2r**,<sup>4</sup> **2s**,<sup>6</sup> **2t**,<sup>7</sup> **2u**,<sup>7</sup> **2v**,<sup>14</sup> **2w**,<sup>4</sup> **2x**,<sup>4</sup> **2y**,<sup>15</sup> **2za**,<sup>4</sup> **2zb**,<sup>16</sup> **2zc**,<sup>17</sup> **2zd**,<sup>18</sup> **2ze**,<sup>19</sup> **3a**,<sup>20</sup> **3b**,<sup>21</sup> **3c**,<sup>22</sup> **3d**,<sup>21</sup> **3e**,<sup>22</sup> **3f**,<sup>20</sup> **3g**,<sup>20</sup> **3h**,<sup>20</sup> **3i**,<sup>20</sup> **3j**,<sup>20</sup> **3k**,<sup>20</sup> **3l**,<sup>20</sup> **3m**,<sup>20</sup> **3n**,<sup>20</sup> **3o**,<sup>23</sup> **3r**,<sup>20</sup> **3t**,<sup>22</sup> **3u**,<sup>22</sup> **3v**,<sup>24</sup> **3x**,<sup>22</sup> **3zb**<sup>24</sup> and **4d**<sup>25</sup> are known compounds, and the characterization data were in accordance with the literature. <sup>1</sup>H/<sup>13</sup>C/<sup>19</sup>F NMR data for these compounds are provided here for completion's sake.

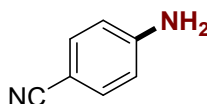

**(2a) 4-aminobenzonitrile (CAS: 873-74-5)**<sup>4</sup>: Following the General Procedure A with 4-bromobenzonitrile (54.6 mg, 0.3 mmol), **2a** was obtained as a yellow solid (24.8 mg, 70%). This target product was purified by column chromatography on silica gel (PE/EA = 2:1).

<sup>1</sup>H NMR (400 MHz, CDCl<sub>3</sub>)  $\delta$  7.40 (d,  $J$  = 8.4 Hz, 2H), 6.65 (d,  $J$  = 8.4 Hz, 2H), 4.22 (s, 2H). <sup>13</sup>C NMR (101 MHz, CDCl<sub>3</sub>)  $\delta$  150.6, 133.8, 120.3, 114.5, 100.0.

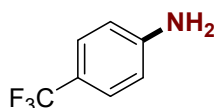

**(2b) 4-(trifluoromethyl)aniline (CAS: 455-14-1)**<sup>4</sup>: Following the General Procedure A with 1-bromo-4-(trifluoromethyl)benzene (67.5 mg, 0.3 mmol), **2b** was obtained as a yellow oil (30.5 mg, 63%). This target product was purified by column chromatography on silica gel (PE/EA = 2:1).

<sup>1</sup>H NMR (400 MHz, CDCl<sub>3</sub>)  $\delta$  7.38 (d,  $J$  = 8.8 Hz, 2H), 6.66 (d,  $J$  = 8.4 Hz, 2H), 3.92 (s, 2H). <sup>13</sup>C NMR (101 MHz, CDCl<sub>3</sub>)  $\delta$  149.4, 126.7 (q,  $J$  = 3.8 Hz), 124.9 (q,  $J$  = 271.5 Hz), 120.1 (q,  $J$  = 32.6 Hz), 114.2. <sup>19</sup>F NMR (376 MHz, CDCl<sub>3</sub>)  $\delta$  -61.16.

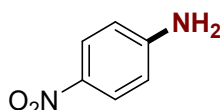

**(2c) 4-nitroaniline (CAS: 100-01-6)**<sup>5</sup>: Following the General Procedure A with 1-bromo-4-nitrobenzene (60.6 mg, 0.3 mmol), **2c** was obtained as a yellow solid (25.7 mg, 62%). This target product was purified by column chromatography on silica gel (PE/EA = 2:1).

<sup>1</sup>H NMR (400 MHz, CDCl<sub>3</sub>)  $\delta$  8.07 (d,  $J$  = 8.8 Hz, 2H), 6.63 (d,  $J$  = 8.8 Hz, 2H), 4.40 (s, 2H). <sup>13</sup>C NMR (101 MHz, CDCl<sub>3</sub>)  $\delta$  152.5, 139.1, 126.34, 113.4.

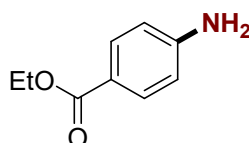

**(2d) ethyl 4-aminobenzoate (CAS: 94-09-7)**<sup>4</sup>: Following the General Procedure A with ethyl 4-bromobenzoate (68.7 mg, 0.3 mmol), **2d** was obtained as a white solid (16.3 mg, 33%). This target product was purified by column chromatography on silica gel (PE/EA = 2:1).

$^1\text{H}$  NMR (400 MHz,  $\text{CDCl}_3$ )  $\delta$  7.90 – 7.80 (m, 2H), 6.67 – 6.59 (m, 2H), 4.31 (q,  $J$  = 7.2 Hz, 2H), 4.03 (s, 2H), 1.36 (t,  $J$  = 7.2 Hz, 3H).  $^{13}\text{C}$  NMR (101 MHz,  $\text{CDCl}_3$ )  $\delta$  166.7, 150.8, 131.6, 120.1, 113.8, 60.3, 14.4.

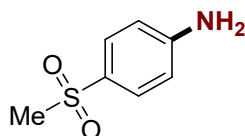

**(2e) 4-(methylsulfonyl)aniline (CAS: 5470-49-5)**<sup>6</sup>: Following the General Procedure A with 1-bromo-4-(methylsulfonyl)benzene (70.5 mg, 0.3 mmol), **2e** was obtained as a white solid (38.0 mg, 74%). This target product was purified by column chromatography on silica gel (PE/EA = 2:1).

$^1\text{H}$  NMR (400 MHz,  $\text{CDCl}_3$ )  $\delta$  7.71 – 7.62 (m, 2H), 6.74 – 6.67 (m, 2H), 4.33 (s, 2H), 3.00 (s, 3H).  $^{13}\text{C}$  NMR (101 MHz,  $\text{CDCl}_3$ )  $\delta$  151.6, 129.4, 128.5, 114.1, 45.0.

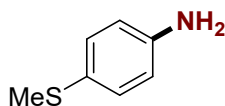

**(2f) 4-(methylthio)aniline (CAS: 104-96-1)**<sup>7</sup>: Following the General Procedure A with (4-bromophenyl)(methyl)sulfane (60.9 mg, 0.3 mmol), **2f** was obtained as a yellow oil (16.7 mg, 40%). This target product was purified by column chromatography on silica gel (PE/EA = 2:1).

$^1\text{H}$  NMR (400 MHz,  $\text{CDCl}_3$ )  $\delta$  7.18 (d,  $J$  = 8.4 Hz, 2H), 6.63 (d,  $J$  = 8.4 Hz, 2H), 3.66 (s, 2H), 2.41 (s, 3H).  $^{13}\text{C}$  NMR (101 MHz,  $\text{CDCl}_3$ )  $\delta$  145.1, 131.0, 125.7, 115.7, 18.7.

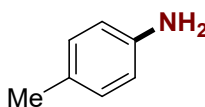

**(2g) p-toluidine (CAS: 106-49-0)**<sup>8</sup>: Following the General Procedure A with 1-bromo-4-methylbenzene (51.3 mg, 0.3 mmol), **2g** was obtained as a yellow oil (12.2 mg, 38%). This target product was purified by column chromatography on silica gel (PE/EA = 2:1).

$^1\text{H}$  NMR (400 MHz,  $\text{CDCl}_3$ )  $\delta$  6.96 (d,  $J$  = 8.0 Hz, 2H), 6.59 (d,  $J$  = 8.4 Hz, 2H), 3.49 (s, 2H), 2.23 (s, 3H).  $^{13}\text{C}$  NMR (101 MHz,  $\text{CDCl}_3$ )  $\delta$  143.9, 129.8, 127.8, 115.3, 20.5.

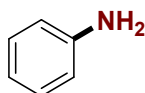

**(2h) aniline (CAS: 62-53-3)**<sup>7</sup>: Following the General Procedure A with bromobenzene (47.1 mg, 0.3 mmol), **2h** was obtained as a yellow oil (11.5 mg, 41%). This target product was purified by column chromatography on silica gel (PE/EA = 2:1).

$^1\text{H}$  NMR (400 MHz,  $\text{CDCl}_3$ )  $\delta$  7.18 – 7.11 (m, 2H), 6.78 – 6.72 (m, 1H), 6.70 – 6.64 (m, 2H), 3.60 (s, 2H).  $^{13}\text{C}$  NMR (101 MHz,  $\text{CDCl}_3$ )  $\delta$  146.4, 129.3, 118.6, 115.1.

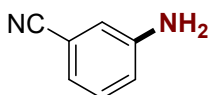

**(2i) 3-aminobenzonitrile (CAS: 2237-30-1)<sup>6</sup>:** Following the General Procedure A with 3-bromobenzonitrile (54.6 mg, 0.3 mmol), **2i** was obtained as a yellow solid (20.5 mg, 58%). This target product was purified by column chromatography on silica gel (PE/EA = 2:1).

<sup>1</sup>H NMR (400 MHz, CDCl<sub>3</sub>) δ 7.21 (t, *J* = 7.9 Hz, 1H), 7.01 (dt, *J* = 7.6, 1.2 Hz, 1H), 6.92 – 6.84 (m, 2H), 3.91 (s, 2H). <sup>13</sup>C NMR (101 MHz, CDCl<sub>3</sub>) δ 147.0, 130.1, 121.9, 119.24, 119.22, 117.4, 112.9.

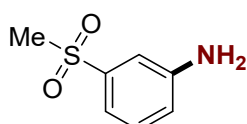

**(2j) 3-(methylsulfonyl)aniline (CAS: 35216-39-8)<sup>9</sup>:** Following the General Procedure A with 1-bromo-3-(methylsulfonyl)benzene (70.5 mg, 0.3 mmol), **2j** was obtained as a yellow solid (30.8 mg, 60%). This target product was purified by column chromatography on silica gel (PE/EA = 2:1).

<sup>1</sup>H NMR (400 MHz, CDCl<sub>3</sub>) δ 7.30 (q, *J* = 8.0 Hz), 7.27 (d, *J* = 1.6 Hz, 1H), 7.26 – 7.24 (m, 1H), 7.21 (t, *J* = 2.0 Hz, 1H), 6.92 – 6.87 (m, 1H), 4.04 (s, 2H), 3.03 (s, 2H). <sup>13</sup>C NMR (101 MHz, CDCl<sub>3</sub>) δ 147.5, 141.34, 130.3, 119.7, 116.6, 112.8, 44.4.

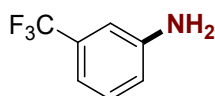

**(2k) 3-(trifluoromethyl)aniline (CAS: 98-16-8)<sup>8</sup>:** Following the General Procedure A with 1-bromo-3-(trifluoromethyl)benzene (67.5 mg, 0.3 mmol), **2k** was obtained as a yellow solid (29.0 mg, 60%). This target product was purified by column chromatography on silica gel (PE/EA = 2:1).

<sup>1</sup>H NMR (400 MHz, CDCl<sub>3</sub>) δ 7.23 (t, *J* = 8.0 Hz, 1H), 7.02 – 6.96 (m, 1H), 6.90 – 6.86 (m, 1H), 6.80 (dd, *J* = 8.4, 2.4 Hz, 1H), 3.81 (s, 2H). <sup>13</sup>C NMR (101 MHz, CDCl<sub>3</sub>) δ 146.7, 131.6 (q, *J* = 31.9 Hz), 129.8, 124.2 (q, *J* = 272.2 Hz), 118.0 (q, *J* = 1.6 Hz), 115.0 (q, *J* = 4.0 Hz), 111.3 (q, *J* = 3.9 Hz). <sup>19</sup>F NMR (376 MHz, CDCl<sub>3</sub>) δ -62.95.

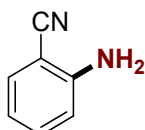

**(2l) 2-aminobenzonitrile (CAS: 1885-29-6)<sup>7</sup>**

Following the General Procedure A with 2-bromobenzonitrile (54.6 mg, 0.3 mmol), **2l** was obtained as a yellow solid (17.4 mg, 49%). This target product was purified by column chromatography on silica gel (PE/EA = 2:1).

<sup>1</sup>H NMR (400 MHz, CDCl<sub>3</sub>) δ 7.38 – 7.28 (m, 2H), 6.77 – 6.68 (m, 2H), 4.45 (s, 2H). <sup>13</sup>C NMR (101 MHz, CDCl<sub>3</sub>) δ 149.6, 133.9, 132.2, 117.8, 117.6, 115.1, 95.8.

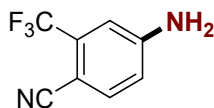

**(2m) 4-amino-2-(trifluoromethyl)benzonitrile (CAS: 98-16-8)<sup>10</sup>:** Following the General Procedure A with 4-bromo-2-(trifluoromethyl)benzonitrile (75.0 mg, 0.3 mmol), **2m** was obtained as a yellow solid (47.5 mg, 85%). This target product was purified by column chromatography on silica gel (PE/EA = 2:1).

<sup>1</sup>H NMR (400 MHz, CDCl<sub>3</sub>)  $\delta$  7.55 (d,  $J$  = 8.4 Hz, 1H), 6.95 (d,  $J$  = 2.0 Hz, 1H), 6.78 (dd,  $J$  = 8.4, 2.0 Hz, 1H), 4.45 (s, 2H). <sup>13</sup>C NMR (101 MHz, CDCl<sub>3</sub>)  $\delta$  150.3, 136.3, 134.5 (q,  $J$  = 32.0 Hz), 122.4 (q,  $J$  = 273.7 Hz), 116.8, 116.3, 112.1 (q,  $J$  = 4.8 Hz). <sup>19</sup>F NMR (376 MHz, CDCl<sub>3</sub>)  $\delta$  -62.55.

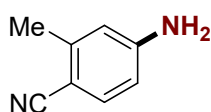

**(2n) 4-amino-2-methylbenzonitrile (CAS: 72115-06-1)<sup>4</sup>:** Following the General Procedure A with 4-bromo-2-methylbenzonitrile (58.8 mg, 0.3 mmol), **2n** was obtained as a yellow solid (23.8 mg, 60%). This target product was purified by column chromatography on silica gel (PE/EA = 2:1).

<sup>1</sup>H NMR (400 MHz, CDCl<sub>3</sub>)  $\delta$  7.34 (d,  $J$  = 8.4 Hz, 1H), 6.53 – 6.44 (m, 2H), 4.15 (s, 2H), 2.41 (s, 3H). <sup>13</sup>C NMR (101 MHz, CDCl<sub>3</sub>)  $\delta$  150.4, 143.5, 134.0, 119.4, 115.3, 112.0, 100.6, 20.4.

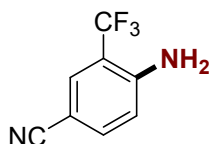

**(2o) 4-amino-3-(trifluoromethyl)benzonitrile (CAS: 327-74-2)<sup>11</sup>:** Following the General Procedure A with 4-bromo-3-(trifluoromethyl)benzonitrile (75.0 mg, 0.3 mmol), **2o** was obtained as a yellow solid (30.2 mg, 54%). This target product was purified by column chromatography on silica gel (PE/EA = 2:1).

<sup>1</sup>H NMR (400 MHz, CDCl<sub>3</sub>)  $\delta$  7.71 (d,  $J$  = 0.8 Hz, 1H), 7.52 (dd,  $J$  = 8.4, 1.6 Hz, 1H), 6.78 (d,  $J$  = 8.4 Hz, 1H), 4.78 (s, 2H). <sup>13</sup>C NMR (101 MHz, CDCl<sub>3</sub>)  $\delta$  148.0, 136.2, 131.6 (q,  $J$  = 5.3 Hz), 123.7 (q,  $J$  = 272.4 Hz), 118.8, 117.2, 113.5 (q,  $J$  = 31.3 Hz), 99.8. <sup>19</sup>F NMR (376 MHz, CDCl<sub>3</sub>)  $\delta$  -63.63.

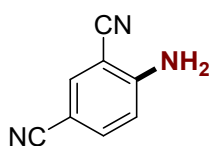

**(2p) 4-aminoisophthalonitrile (CAS: 19619-22-8)<sup>12</sup>:** Following the General Procedure A with 4-bromoisophthalonitrile (62.1 mg, 0.3 mmol), **2p** was obtained as a yellow solid (24.9 mg, 58%). This target product was purified by column chromatography on silica gel (PE/EA = 2:1).

$^1\text{H}$  NMR (400 MHz, DMSO)  $\delta$  7.99 (d,  $J$  = 2.0 Hz, 1H), 7.63 (dd,  $J$  = 8.8, 2.0 Hz, 1H), 7.06 (s, 2H), 6.85 (d,  $J$  = 8.8 Hz, 1H).  $^{13}\text{C}$  NMR (101 MHz, DMSO)  $\delta$  154.8, 138.8, 137.1, 119.2, 116.8, 116.1, 97.3, 94.1.

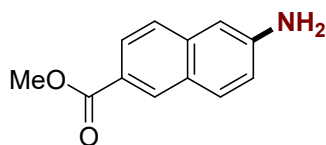

**(2q) methyl 6-amino-2-naphthoate (CAS: 5159-59-1)**<sup>13</sup>: Following the General Procedure A with methyl 6-bromo-2-naphthoate (79.5 mg, 0.3 mmol), **2q** was obtained as a yellow solid (38.6 mg, 64%). This target product was purified by column chromatography on silica gel (PE/EA = 2:1).

$^1\text{H}$  NMR (400 MHz, DMSO)  $\delta$  8.34 (d,  $J$  = 1.2 Hz, 1H), 7.80 – 7.71 (m, 2H), 7.54 (d,  $J$  = 8.8 Hz, 1H), 7.01 (dd,  $J$  = 8.8, 2.4 Hz, 1H), 6.84 (d,  $J$  = 2.0 Hz, 1H), 5.85 (s, 2H), 3.85 (s, 3H).  $^{13}\text{C}$  NMR (101 MHz, DMSO)  $\delta$  167.2, 149.9, 138.1, 131.1, 131.0, 125.6, 125.5, 125.3, 121.9, 119.5, 105.6, 52.2.

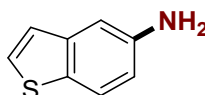

**(2r) benzo[b]thiophen-5-amine (CAS: 20532-28-9)**<sup>4</sup>: Following the General Procedure A with 5-bromobenzo[b]thiophene (63.9 mg, 0.3 mmol), **2r** was obtained as a yellow solid (17.0 mg, 38%). This target product was purified by column chromatography on silica gel (PE/EA = 2:1).

$^1\text{H}$  NMR (400 MHz,  $\text{CDCl}_3$ )  $\delta$  7.61 (d,  $J$  = 8.4 Hz, 1H), 7.36 (d,  $J$  = 5.6 Hz, 1H), 7.13 (d,  $J$  = 5.6 Hz, 1H), 7.07 (d,  $J$  = 2.0 Hz, 1H), 6.75 (dd,  $J$  = 8.4, 2.4 Hz, 1H), 3.67 (s, 2H).  $^{13}\text{C}$  NMR (101 MHz,  $\text{CDCl}_3$ )  $\delta$  143.5, 140.8, 130.4, 127.0, 123.00, 122.95, 114.8, 108.2.

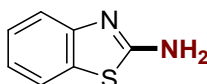

**(2s) benzo[d]thiazol-2-amine (CAS: 136-95-8)**<sup>6</sup>: Following the General Procedure A with 2-bromobenzo[d]thiazole (64.2 mg, 0.3 mmol), **2s** was obtained as a yellow solid (23.0 mg, 51%). This target product was purified by column chromatography on silica gel (PE/EA = 2:1).

$^1\text{H}$  NMR (400 MHz,  $\text{CDCl}_3$ )  $\delta$  7.59 (d,  $J$  = 8.0 Hz, 1H), 7.54 (d,  $J$  = 8.4 Hz, 1H), 7.34 – 7.28 (m, 1H), 7.16 – 7.10 (m, 1H), 5.56 (s, 2H).  $^{13}\text{C}$  NMR (101 MHz,  $\text{CDCl}_3$ )  $\delta$  165.9, 152.0, 131.6, 126.0, 122.3, 120.9, 119.2.

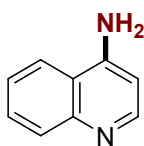

**(2t) quinolin-4-amine (CAS: 578-68-7)**<sup>7</sup>: Following the General Procedure A with 4-bromoquinoline (64.2 mg, 0.3 mmol), **2t** was obtained as a yellow solid (24.6 mg, 57%). This target product was purified by column chromatography on silica gel (PE/EA = 2:1).

$^1\text{H}$  NMR (400 MHz, DMSO)  $\delta$  8.32 (d,  $J$  = 5.2 Hz, 1H), 8.19 – 8.12 (m, 1H), 7.79 – 7.74 (m, 1H), 7.62 – 7.55 (m, 1H), 7.42 – 7.34 (m, 1H), 6.79 (s, 2H), 6.56 (d,  $J$  = 5.2 Hz, 1H).  $^{13}\text{C}$  NMR (101 MHz, DMSO)  $\delta$  151.9, 150.8, 149.3, 129.4, 129.3, 123.9, 122.8, 119.1, 102.8.

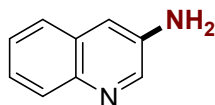

**(2u) quinolin-3-amine (CAS: 578-68-7)**<sup>7</sup>: Following the General Procedure A with 4-bromoquinoline (62.4 mg, 0.3 mmol), **2u** was obtained as a yellow solid (24.7mg, 57%). This target product was purified by column chromatography on silica gel (PE/EA = 2:1).

$^1\text{H}$  NMR (400 MHz,  $\text{CDCl}_3$ )  $\delta$  8.51 (d,  $J$  = 2.8 Hz, 1H), 7.99 – 7.93 (m, 1H), 7.61 – 7.56 (m, 1H), 7.48 – 7.39 (m, 2H), 7.23 (d,  $J$  = 2.4 Hz, 1H), 3.93 (s, 2H).  $^{13}\text{C}$  NMR (101 MHz,  $\text{CDCl}_3$ )  $\delta$  143.1, 142.8, 139.7, 129.10, 129.07, 126.9, 125.8, 125.6, 114.9.

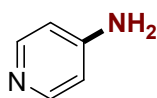

**(2v) pyridin-4-amine (CAS: 504-24-5)**<sup>14</sup>: Following the General Procedure A with 4-bromopyridine (47.4 mg, 0.3 mmol), **2v** was obtained as a white solid (14.7 mg, 52%). This target product was purified by column chromatography on silica gel (PE/EA = 2:1).

$^1\text{H}$  NMR (400 MHz, DMSO)  $\delta$  7.95 (dd,  $J$  = 4.8, 1.5 Hz, 2H), 6.44 (dd,  $J$  = 4.8, 1.6 Hz, 2H), 5.95 (s, 2H).  $^{13}\text{C}$  NMR (101 MHz, DMSO)  $\delta$  154.7, 150.0, 109.3.

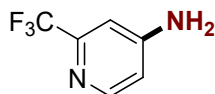

**(2w) 2-(trifluoromethyl)pyridin-4-amine (CAS: 147149-98-2)**<sup>4</sup>: Following the General Procedure A with 4-bromo-2-(trifluoromethyl)pyridine (67.8 mg, 0.3 mmol), **2w** was obtained as a yellow solid (44.3 mg, 91%). This target product was purified by column chromatography on silica gel (PE/EA = 2:1).

$^1\text{H}$  NMR (400 MHz,  $\text{CDCl}_3$ )  $\delta$  8.25 (s, 1H), 6.87 (s, 1H), 6.62 (d,  $J$  = 2.4 Hz, 1H), 4.64 (s, 2H).  $^{13}\text{C}$  NMR (101 MHz,  $\text{CDCl}_3$ )  $\delta$  153.93, 150.29, 148.93 (q,  $J$  = 33.7 Hz), 121.7 (q,  $J$  = 275.3 Hz), 111.13, 106.24 (q,  $J$  = 3.1 Hz).  $^{19}\text{F}$  NMR (376 MHz,  $\text{CDCl}_3$ )  $\delta$  -68.53.

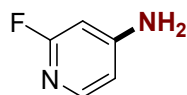

**(2x) 2-fluoropyridin-4-amine (CAS: 18614-51-2)**<sup>4</sup>: Following the General Procedure A with 4-bromo-2-fluoropyridine (52.8 mg, 0.3 mmol), **2x** was obtained as a yellow solid (20.9 mg, 62%). This target product was purified by column chromatography on silica gel (PE/EA = 2:1).

$^1\text{H}$  NMR (400 MHz,  $\text{CDCl}_3$ )  $\delta$  7.80 (d,  $J$  = 5.6 Hz, 1H), 6.43 – 6.36 (m, 1H), 6.08 (d,  $J$  = 2.0 Hz, 1H), 4.61 (s, 2H).  $^{13}\text{C}$  NMR (101 MHz,  $\text{CDCl}_3$ )  $\delta$  165.44 (d,  $J$  = 232.2 Hz), 157.20 (d,  $J$  = 11.7 Hz), 147.50 (d,  $J$  = 18.6 Hz), 108.21 (d,  $J$  = 2.9 Hz), 92.78 (d,  $J$  = 41.8 Hz).  $^{19}\text{F}$  NMR (376 MHz,  $\text{CDCl}_3$ )  $\delta$  -69.93.

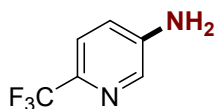

**(2y) 6-(trifluoromethyl)pyridin-3-amine (CAS: 106877-33-2)<sup>15</sup>:** Following the General Procedure A with 5-bromo-2-(trifluoromethyl)pyridine (67.8 mg, 0.3 mmol), **2y** was obtained as a yellow solid (31.1 mg, 64%). This target product was purified by column chromatography on silica gel (PE/EA = 2:1).

<sup>1</sup>H NMR (400 MHz, CDCl<sub>3</sub>) δ 8.1 (d, *J* = 2.8 Hz, 1H), 7.4 (d, *J* = 8.4 Hz, 1H), 7.03 – 6.98 (m, 1H), 4.07 (s, 2H). <sup>13</sup>C NMR (101 MHz, CDCl<sub>3</sub>) δ 144.8, 137.8 (q, *J* = 34.9 Hz), 136.9, 122.2 (q, *J* = 273.3 Hz), 121.2 (q, *J* = 2.8 Hz), 120.5. <sup>19</sup>F NMR (376 MHz, CDCl<sub>3</sub>) δ -66.63.

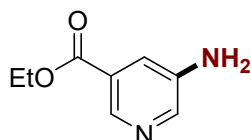

**(2z) ethyl 5-aminonicotinate:** Following the General Procedure A with ethyl 5-bromonicotinate (69.0 mg, 0.3 mmol), **2z** was obtained as a yellow solid (37.9 mg, 76%). This target product was purified by column chromatography on silica gel (PE/EA = 2:1).

<sup>1</sup>H NMR (400 MHz, CDCl<sub>3</sub>) δ 9.40 – 8.16 (m, 2H), 7.52 (s, 1H), 4.37 (q, *J* = 7.2 Hz, 2H), 3.86 (s, 2H), 1.38 (t, *J* = 7.2 Hz, 3H). <sup>13</sup>C NMR (101 MHz, CDCl<sub>3</sub>) δ 166.1, 143.7, 140.8, 129.9, 121.6, 116.1, 61.3, 14.3. HRMS (ESI) *m/z* calcd for C<sub>10</sub>H<sub>10</sub>N<sub>2</sub>O<sub>3</sub> (M+H)<sup>+</sup> 214.07038, found 214.07043.

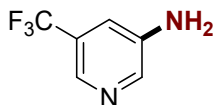

**(2za) 5-(trifluoromethyl)pyridin-3-amine (CAS: 112110-07-3)<sup>4</sup>:** Following the General Procedure A with 3-bromo-5-(trifluoromethyl)pyridine (67.8 mg, 0.3 mmol), **2za** was obtained as a yellow solid (34.1 mg, 70%). This target product was purified by column chromatography on silica gel (PE/EA = 2:1).

<sup>1</sup>H NMR (400 MHz, CDCl<sub>3</sub>) δ 8.29 – 8.22 (m, 2H), 7.15 (t, *J* = 2.4 Hz, 1H), 3.99 (s, 2H). <sup>13</sup>C NMR (101 MHz, CDCl<sub>3</sub>) δ 142.3, 140.3 (q, *J* = 1.6 Hz), 136.1 (q, *J* = 4.3 Hz), 126.9 (q, *J* = 32.4 Hz), 123.6 (q, *J* = 273.5 Hz), 117.4 (q, *J* = 3.7 Hz). <sup>19</sup>F NMR (376 MHz, CDCl<sub>3</sub>) δ -62.73.

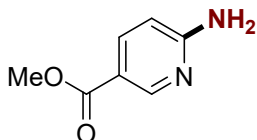

**(2zb) methyl 6-aminonicotinate (CAS: 36052-24-1)<sup>16</sup>:** Following the General Procedure A with methyl 6-bromonicotinate (64.8 mg, 0.3 mmol), **2zb** was obtained as a yellow solid (35.6 mg, 78%). This target product was purified by column chromatography on silica gel (PE/EA = 2:1).

<sup>1</sup>H NMR (400 MHz, DMSO) δ 8.54 (s, 1H), 7.81 (dd, *J* = 8.8, 2.4 Hz, 1H), 6.82 (s, 2H), 6.47 (d, *J* = 8.8 Hz, 1H), 3.75 (s, 3H). <sup>13</sup>C NMR (101 MHz, DMSO) δ 166.2, 163.1, 151.5, 138.0, 113.8, 107.7, 51.8.

HRMS (ESI) *m/z* calcd for C<sub>7</sub>H<sub>9</sub>N<sub>2</sub>O<sub>2</sub> (M+H)<sup>+</sup> 153.06585, found 153.06573.

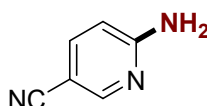

**(2zc) 6-aminonicotinonitrile (CAS: 4214-73-7)**<sup>17</sup>: Following the General Procedure A with 6-bromonicotinonitrile (54.9 mg, 0.3 mmol), **2zc** was obtained as a yellow solid (21.1 mg, 59%). This target product was purified by column chromatography on silica gel (PE/EA = 2:1).

<sup>1</sup>H NMR (400 MHz, CDCl<sub>3</sub>)  $\delta$  8.36 (d,  $J$  = 1.6 Hz, 1H), 7.61 (dd,  $J$  = 8.4, 2.0 Hz, 1H), 6.50 (d,  $J$  = 8.8 Hz, 1H), 5.04 (s, 2H). <sup>13</sup>C NMR (101 MHz, CDCl<sub>3</sub>)  $\delta$  160.1, 153.12, 140.2, 118.1, 108.0, 98.5.

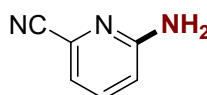

**(2zd) 6-aminopicolinonitrile (CAS: 370556-44-8)**<sup>18</sup>: Following the General Procedure A with 6-bromopicolinonitrile (54.9 mg, 0.3 mmol), **2zd** was obtained as a yellow solid (15.4 mg, 43%). This target product was purified by column chromatography on silica gel (PE/EA = 2:1).

<sup>1</sup>H NMR (400 MHz, CDCl<sub>3</sub>)  $\delta$  7.53 – 7.46 (m, 1H), 7.03 (dd,  $J$  = 7.2, 0.8 Hz, 1H), 6.68 (dd,  $J$  = 8.4, 0.8 Hz, 1H), 4.85 (s, 2H). <sup>13</sup>C NMR (101 MHz, CDCl<sub>3</sub>)  $\delta$  158.9, 138.2, 131.6, 119.0, 117.6, 112.8.

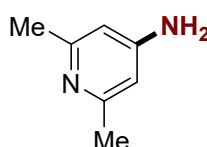

**(2ze) 2,6-dimethylpyridin-4-amine (CAS: 3512-80-9)**<sup>19</sup>: Following the General Procedure A with 4-bromo-2,6-dimethylpyridine (55.8 mg, 0.3 mmol), **2ze** was obtained as a yellow solid (17.2 mg, 47%). This target product was purified by column chromatography on silica gel (PE/EA = 2:1).

<sup>1</sup>H NMR (400 MHz, CDCl<sub>3</sub>)  $\delta$  6.24 (s, 2H), 3.98 (s, 2H), 2.39 (s, 6H). <sup>13</sup>C NMR (101 MHz, CDCl<sub>3</sub>)  $\delta$  158.3, 153.4, 106.3, 24.4.

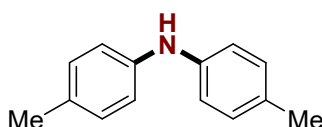

**(3a) di-p-tolylamine (CAS: 620-93-9)**<sup>20</sup>: Following the General Procedure B with 1-bromo-4-methylbenzene (51.3 mg, 0.3 mmol), **3a** was obtained as a yellow solid (29.6 mg, 70%). This target product was purified by column chromatography on silica gel (PE/EA = 5:1).

<sup>1</sup>H NMR (400 MHz, CDCl<sub>3</sub>)  $\delta$  7.05 (d,  $J$  = 8.0 Hz, 4H), 6.96 – 6.91 (m, 4H), 5.48 (s, 1H), 2.28 (s, 6H). <sup>13</sup>C NMR (101 MHz, CDCl<sub>3</sub>)  $\delta$  141.2, 130.2, 129.9, 117.9, 20.7.

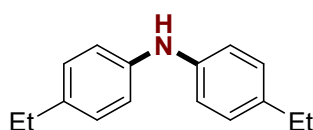

**(3b) bis(4-ethylphenyl)amine (CAS: 7268-62-4)**<sup>21</sup>: Following the General Procedure B with 1-

bromo-4-ethylbenzene (55.5 mg, 0.3 mmol), **3b** was obtained as a yellow solid (19.3 mg, 57%). This target product was purified by column chromatography on silica gel (PE/EA = 5:1).  $^1\text{H}$  NMR (400 MHz,  $\text{CDCl}_3$ )  $\delta$  7.08 (d,  $J$  = 8.8 Hz, 4H), 7.01 – 6.94 (m, 4H), 5.52 (s, 1H), 2.59 (q,  $J$  = 7.6 Hz, 4H), 1.22 (t,  $J$  = 7.6 Hz, 6H).  $^{13}\text{C}$  NMR (101 MHz,  $\text{CDCl}_3$ )  $\delta$  141.3, 136.7, 128.7, 117.9, 28.2, 15.9.

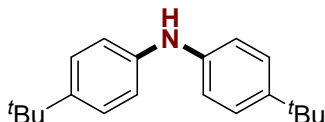

**(3c) bis(4-(tert-butyl)phenyl)amine (CAS: 4627-22-9)**<sup>22</sup>: Following the General Procedure B with 1-bromo-4-(tert-butyl)benzene (63.9 mg, 0.3 mmol), **3c** was obtained as a yellow solid (30.1 mg, 76%). This target product was purified by column chromatography on silica gel (PE/EA = 5:1).

$^1\text{H}$  NMR (400 MHz,  $\text{CDCl}_3$ )  $\delta$  7.29 – 7.24 (m, 4H), 7.02 – 6.97 (m, 4H), 5.55 (s, 1H), 1.30 (s, 18H).  $^{13}\text{C}$  NMR (101 MHz,  $\text{CDCl}_3$ )  $\delta$  143.6, 141.0, 126.1, 117.4, 34.12, 31.5.

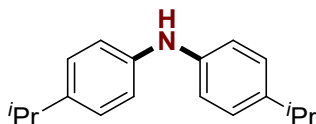

**(3d) bis(4-isopropylphenyl)amine (CAS: 63451-41-2)**<sup>21</sup>: Following the General Procedure B with 1-bromo-4-isopropylbenzene (59.7 mg, 0.3 mmol), **3d** was obtained as a yellow solid (28.9 mg, 76%). This target product was purified by column chromatography on silica gel (PE/EA = 5:1).

$^1\text{H}$  NMR (400 MHz,  $\text{CDCl}_3$ )  $\delta$  7.11 (d,  $J$  = 8.4 Hz, 4H), 6.98 (d,  $J$  = 8.4 Hz, 4H), 5.53 (s, 1H), 2.91 – 2.78 (m, 2H), 1.23 (d,  $J$  = 6.8 Hz, 12H).  $^{13}\text{C}$  NMR (101 MHz,  $\text{CDCl}_3$ )  $\delta$  141.4, 128.8, 127.2, 117.8, 33.4, 24.2.

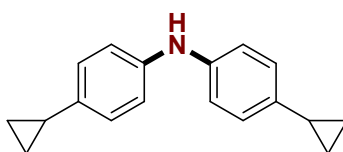

**(3e) bis(4-cyclopropylphenyl)amine (CAS: 2722001-27-4)**<sup>22</sup>: Following the General Procedure B with 1-bromo-4-cyclopropylbenzene (59.1 mg, 0.3 mmol), **3e** was obtained as a yellow solid (25.4 mg, 68%). This target product was purified by column chromatography on silica gel (PE/EA = 5:1).

$^1\text{H}$  NMR (400 MHz,  $\text{CDCl}_3$ )  $\delta$  6.95 (q,  $J$  = 8.4 Hz, 8H), 5.50 (s, 1H), 1.89 – 1.78 (m, 2H), 0.97 – 0.82 (m, 4H), 0.68 – 0.54 (m, 4H).  $^{13}\text{C}$  NMR (101 MHz,  $\text{CDCl}_3$ )  $\delta$  141.2, 136.2, 126.7, 117.9, 14.8, 8.6.

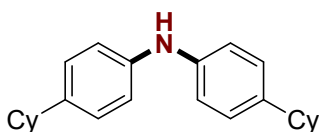

**(3f) bis(4-cyclohexylphenyl)amine (CAS: 163687-39-6)**<sup>20</sup>: Following the General Procedure

B with 1-bromo-4-cyclohexylbenzene (71.8 mg, 0.3 mmol), **3f** was obtained as a yellow solid (27.0 mg, 54%). This target product was purified by column chromatography on silica gel (PE/EA = 5:1).

$^1\text{H}$  NMR (400 MHz,  $\text{CDCl}_3$ )  $\delta$  7.09 (d,  $J$  = 8.4 Hz, 4H), 6.97 (d,  $J$  = 8.4 Hz, 4H), 5.53 (s, 1H), 2.50 – 2.37 (m, 2H), 1.90 – 1.79 (m, 8H), 1.77 – 1.69 (m, 2H), 1.44 – 1.32 (m, 8H), 1.29 – 1.18 (m, 2H).  $^{13}\text{C}$  NMR (101 MHz,  $\text{CDCl}_3$ )  $\delta$  141.4, 140.7, 127.5, 117.8, 43.8, 34.7, 27.0, 26.2.

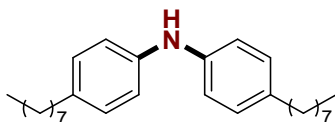

**(3g) bis(4-octylphenyl)amine (CAS: 101-67-7)**<sup>20</sup>: Following the General Procedure B with 1-bromo-4-octylbenzene (80.8 mg, 0.3 mmol), **3g** was obtained as a yellow solid (33.1 mg, 56%). This target product was purified by column chromatography on silica gel (PE/EA = 5:1).

$^1\text{H}$  NMR (400 MHz,  $\text{CDCl}_3$ )  $\delta$  7.05 (d,  $J$  = 8.4 Hz, 4H), 6.96 (d,  $J$  = 8.4 Hz, 4H), 5.51 (s, 1H), 2.58 – 2.47 (m, 4H), 1.64 – 1.54 (m, 4H), 1.34 – 1.23 (m, 20H), 0.92 – 0.84 (m, 6H).  $^{13}\text{C}$  NMR (101 MHz,  $\text{CDCl}_3$ )  $\delta$  141.3, 135.4, 129.2, 117.8, 35.3, 31.9, 31.8, 29.6, 29.4, 29.3, 22.7, 14.2.

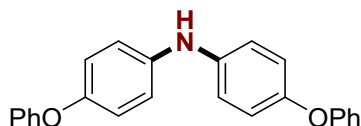

**(3h) bis(4-phenoxyphenyl)amine (CAS: 18162-30-6)**<sup>20</sup>: Following the General Procedure B with 1-bromo-4-phenoxybenzene (74.7 mg, 0.3 mmol), **3h** was obtained as a yellow solid (29.7 mg, 56%). This target product was purified by column chromatography on silica gel (PE/EA = 5:1).

$^1\text{H}$  NMR (400 MHz,  $\text{CDCl}_3$ )  $\delta$  7.34 – 7.27 (m, 4H), 7.07 – 6.93 (m, 14H), 5.55 (s, 1H).  $^{13}\text{C}$  NMR (101 MHz,  $\text{CDCl}_3$ )  $\delta$  158.3, 150.8, 139.7, 129.7, 122.6, 120.7, 119.3, 117.8.

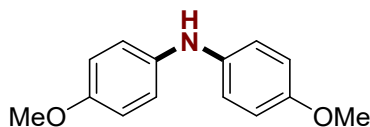

**(3i) bis(4-methoxyphenyl)amine (CAS: 101-70-2)**<sup>20</sup>: Following the General Procedure B with 1-bromo-4-methoxybenzene (56.1 mg, 0.3 mmol), **3i** was obtained as a yellow solid (16.5 mg, 48%). This target product was purified by column chromatography on silica gel (PE/EA = 5:1).

$^1\text{H}$  NMR (400 MHz,  $\text{CDCl}_3$ )  $\delta$  6.94 (d,  $J$  = 8.8 Hz, 4H), 6.85 – 6.79 (m, 4H), 5.28 (s, 1H), 3.78 (s, 6H).  $^{13}\text{C}$  NMR (101 MHz,  $\text{CDCl}_3$ )  $\delta$  154.3, 138.0, 119.6, 114.7, 55.7.

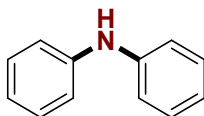

**(3j) diphenylamine (CAS: 122-39-4)**<sup>20</sup>: Following the General Procedure B with bromobenzene (47.1 mg, 0.3 mmol), **3j** was obtained as a yellow solid (17.3 mg, 68%). This target product was purified by column chromatography on silica gel (PE/EA = 5:1).

$^1\text{H}$  NMR (400 MHz,  $\text{CDCl}_3$ )  $\delta$  7.29 – 7.23 (m, 4H), 7.09 – 7.04 (m, 4H), 6.95 – 6.89 (m, 2H), 5.68 (s, 1H).  $^{13}\text{C}$  NMR (101 MHz,  $\text{CDCl}_3$ )  $\delta$  143.2, 129.4, 121.0, 117.8.

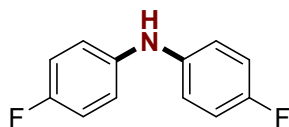

**(3k) bis(4-fluorophenyl)amine (CAS: 330-91-6)**<sup>20</sup>: Following the General Procedure B with 1-bromo-4-fluorobenzene (52.5 mg, 0.3 mmol), **3k** was obtained as a yellow solid (25.2 mg, 82%). This target product was purified by column chromatography on silica gel (PE/EA = 5:1).

$^1\text{H}$  NMR (400 MHz,  $\text{CDCl}_3$ )  $\delta$  6.95 (d,  $J$  = 6.0 Hz, 8H), 5.46 (s, 1H).  $^{13}\text{C}$  NMR (101 MHz,  $\text{CDCl}_3$ )  $\delta$  157.8 (d,  $J$  = 239.7 Hz), 139.8 (d,  $J$  = 2.4 Hz), 119.4 (d,  $J$  = 7.7 Hz), 116.0 (d,  $J$  = 22.5 Hz).  $^{19}\text{F}$  NMR (376 MHz,  $\text{CDCl}_3$ )  $\delta$  -122.63.

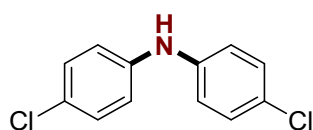

**(3l) bis(4-chlorophenyl)amine (CAS: 6962-04-5)**<sup>20</sup>: Following the General Procedure B with 1-bromo-4-chlorobenzene (57.4 mg, 0.3 mmol), **3l** was obtained as a yellow solid (24.6 mg, 69%). This target product was purified by column chromatography on silica gel (PE/EA = 5:1).

$^1\text{H}$  NMR (400 MHz,  $\text{CDCl}_3$ )  $\delta$  7.25 (d,  $J$  = 8.4 Hz, 4H), 6.99 (d,  $J$  = 8.8 Hz, 4H), 5.66 (s, 1H).  $^{13}\text{C}$  NMR (101 MHz,  $\text{CDCl}_3$ )  $\delta$  141.4, 129.4, 126.1, 119.1.

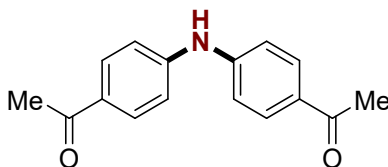

**(3m) 1,1'-(azanediyldibis(4,1-phenylene))bis(ethan-1-one) (CAS: 20255-76-9)**<sup>20</sup>: Following the General Procedure B with 1-(4-bromophenyl)ethan-1-one (59.7 mg, 0.3 mmol), **3m** was obtained as a yellow solid (15.6 mg, 41%). This target product was purified by column chromatography on silica gel (PE/EA = 5:1).

$^1\text{H}$  NMR (400 MHz,  $\text{CDCl}_3$ )  $\delta$  7.94 (d,  $J$  = 8.4 Hz, 4H), 7.16 (d,  $J$  = 8.4 Hz, 4H), 6.36 (s, 1H), 2.57 (s, 6H).  $^{13}\text{C}$  NMR (101 MHz,  $\text{CDCl}_3$ )  $\delta$  196.4, 145.8, 131.0, 130.5, 117.0, 26.3.

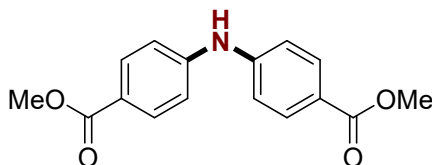

**(3n) dimethyl 4,4'-azanediyldibenzoate (CAS: 17104-81-3)**<sup>20</sup>: Following the General Procedure B with methyl 4-bromobenzoate (64.5 mg, 0.3 mmol), **3n** was obtained as a yellow solid (34.7 mg, 81%). This target product was purified by column chromatography on silica gel (PE/EA = 5:1).

$^1\text{H}$  NMR (400 MHz,  $\text{CDCl}_3$ )  $\delta$  7.98 (d,  $J$  = 8.4 Hz, 4H), 7.13 (d,  $J$  = 8.8 Hz, 4H), 6.44 (s, 1H), 3.89 (s, 6H).  $^{13}\text{C}$  NMR (101 MHz,  $\text{CDCl}_3$ )  $\delta$  166.8, 145.9, 131.5, 123.1, 116.9, 51.9.

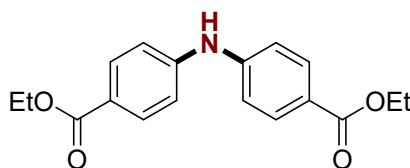

**(3o) diethyl 4,4'-azanediylidibenzoate (CAS: 53884-32-5)**<sup>23</sup>: Following the General Procedure B with ethyl 4-bromobenzoate (68.7 mg, 0.3 mmol), **3o** was obtained as a yellow solid (33.8 mg, 72%). This target product was purified by column chromatography on silica gel (PE/EA = 5:1). <sup>1</sup>H NMR (400 MHz, CDCl<sub>3</sub>) δ 7.98 (d, *J* = 8.8 Hz, 4H), 7.13 (d, *J* = 8.4 Hz, 4H), 6.44 (s, 1H), 4.36 (q, *J* = 7.2 Hz, 4H), 1.38 (t, *J* = 7.2 Hz, 6H). <sup>13</sup>C NMR (101 MHz, CDCl<sub>3</sub>) δ 166.3, 145.8, 131.4, 123.4, 116.9, 60.7, 14.4.

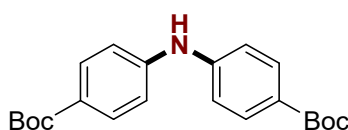

**(3p) di-tert-butyl 4,4'-azanediylidibenzoate (CAS: 386218-10-6)**: Following the General Procedure B with tert-butyl 4-bromobenzoate (77.1 mg, 0.3 mmol), **3p** was obtained as a yellow solid (38.8 mg, 70%). This target product was purified by column chromatography on silica gel (PE/EA = 5:1).

<sup>1</sup>H NMR (400 MHz, CDCl<sub>3</sub>) δ 7.92 (d, *J* = 8.8 Hz, 4H), 7.10 (d, *J* = 8.4 Hz, 4H), 6.40 (s, 1H), 1.59 (s, 18H). <sup>13</sup>C NMR (101 MHz, CDCl<sub>3</sub>) δ 165.5, 145.6, 131.24, 124.9, 116.7, 80.6, 28.3.

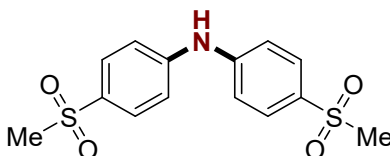

**(3q) bis(4-(methylsulfonyl)phenyl)amine (CAS: 1140964-63-1)**: Following the General Procedure B with 1-bromo-4-(methylsulfonyl)benzene (70.5 mg, 0.3 mmol), **3q** was obtained as a yellow solid (28.8 mg, 59%). This target product was purified by column chromatography on silica gel (PE/EA = 5:1).

<sup>1</sup>H NMR (400 MHz, DMSO) δ 9.45 (s, 1H), 7.82 (d, *J* = 8.8 Hz, 4H), 7.35 (d, *J* = 8.8 Hz, 4H), 3.16 (s, 6H). <sup>13</sup>C NMR (101 MHz, DMSO) δ 146.9, 132.4, 129.4, 117.3, 44.5. HRMS (ESI) *m/z* calcd for C<sub>14</sub>H<sub>15</sub>NO<sub>4</sub>S<sub>2</sub> (M+H)<sup>+</sup> 326.05153, found 326.05096.

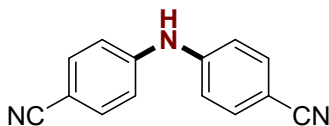

**(3r) 4,4'-azanediylidibenzonitrile (CAS: 36602-05-8)**<sup>20</sup>: Following the General Procedure B with 4-bromobenzonitrile (54.6 mg, 0.3 mmol), **3r** was obtained as a yellow solid (16.8 mg, 51%). This target product was purified by column chromatography on silica gel (PE/EA = 5:1).

<sup>1</sup>H NMR (400 MHz, DMSO) δ 9.45 (s, 1H), 7.71 (d, *J* = 8.8 Hz, 4H), 7.27 (d, *J* = 8.8 Hz, 4H). <sup>13</sup>C NMR (101 MHz, DMSO) δ 146.2, 134.3, 119.9, 117.8, 102.6.

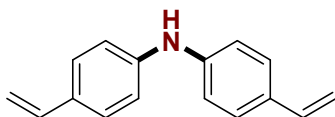

**(3s) bis(4-vinylphenyl)amine (CAS: 852360-34-0):** Following the General Procedure B with 1-bromo-4-vinylbenzene (54.9 mg, 0.3 mmol), **3s** was obtained as a yellow solid (14.3 mg, 43%). This target product was purified by column chromatography on silica gel (PE/EA = 5:1).

$^1\text{H}$  NMR (400 MHz,  $\text{CDCl}_3$ )  $\delta$  7.33 (d,  $J$  = 8.4 Hz, 4H), 7.02 (d,  $J$  = 8.4 Hz, 4H), 6.66 (dd,  $J$  = 17.6, 10.8 Hz, 2H), 5.80 (s, 1H), 5.62 (d,  $J$  = 17.6 Hz, 2H), 5.12 (d,  $J$  = 11.2 Hz, 2H).  $^{13}\text{C}$  NMR (101 MHz,  $\text{CDCl}_3$ )  $\delta$  142.5, 136.3, 130.7, 127.3, 117.7, 111.4.

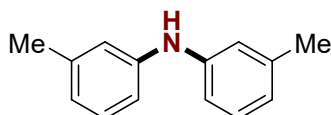

**(3t) di-m-tolylamine (CAS: 626-13-1)**<sup>22</sup>: Following the General Procedure B with 1-bromo-3-methylbenzene (51.3 mg, 0.3 mmol), **3t** was obtained as a yellow solid (18.6 mg, 63%). This target product was purified by column chromatography on silica gel (PE/EA = 5:1).

$^1\text{H}$  NMR (400 MHz,  $\text{CDCl}_3$ )  $\delta$  7.18 – 7.10 (m, 2H), 6.91 – 6.84 (m, 4H), 6.74 (d,  $J$  = 7.6 Hz, 2H), 5.59 (s, 1H), 2.30 (s, 6H).  $^{13}\text{C}$  NMR (101 MHz,  $\text{CDCl}_3$ )  $\delta$  143.2, 139.2, 129.2, 121.8, 118.6, 115.0, 21.6.

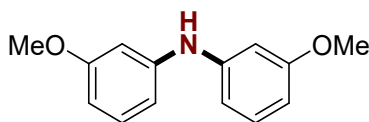

**(3u) bis(3-methoxyphenyl)amine (CAS: 92248-06-1)**<sup>22</sup>: Following the General Procedure B with 1-bromo-3-methoxybenzene (56.1 mg, 0.3 mmol), **3u** was obtained as a yellow solid (21.3 mg, 62%). This target product was purified by column chromatography on silica gel (PE/EA = 5:1).

$^1\text{H}$  NMR (400 MHz,  $\text{CDCl}_3$ )  $\delta$  7.16 (t,  $J$  = 8.0 Hz, 2H), 6.70 – 6.62 (m, 4H), 6.52 – 6.45 (m, 2H), 5.72 (s, 1H), 3.77 (s, 6H).  $^{13}\text{C}$  NMR (101 MHz,  $\text{CDCl}_3$ )  $\delta$  160.7, 144.3, 130.1, 110.7, 106.5, 103.8, 55.2.

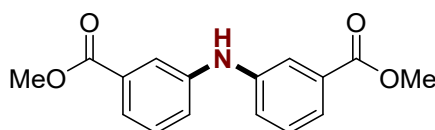

**(3v) dimethyl 3,3'-azanediylidibenzoate (CAS: 1359968-14-1)**<sup>24</sup>: Following the General Procedure B with methyl 3-bromobenzoate (64.5 mg, 0.3 mmol), **3v** was obtained as a yellow solid (24.0 mg, 56%). This target product was purified by column chromatography on silica gel (PE/EA = 5:1).

$^1\text{H}$  NMR (400 MHz,  $\text{CDCl}_3$ )  $\delta$  7.72 (s, 2H), 7.62 (d,  $J$  = 7.6 Hz, 2H), 7.34 (t,  $J$  = 8.0 Hz, 2H), 7.31 – 7.27 (m, 2H), 5.99 (s, 1H), 3.91 (s, 6H).  $^{13}\text{C}$  NMR (101 MHz,  $\text{CDCl}_3$ )  $\delta$  167.0, 142.9, 131.5, 129.5, 122.5, 122.0, 118.9, 52.2.

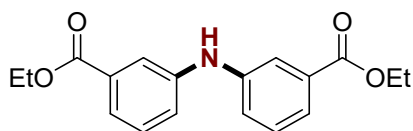

**(3w) diethyl 3,3'-azanediyl dibenzoate:** Following the General Procedure B with ethyl 3-bromobenzoate (68.7 mg, 0.3 mmol), **3w** was obtained as a yellow solid (21.2 mg, 45%). This target product was purified by column chromatography on silica gel (PE/EA = 5:1).

$^1\text{H}$  NMR (400 MHz,  $\text{CDCl}_3$ )  $\delta$  7.75 – 7.71 (m, 2H), 7.66 – 7.59 (m, 2H), 7.34 (t,  $J$  = 8.0 Hz, 2H), 7.30 – 7.26 (m, 2H), 5.99 (s, 1H), 4.37 (q,  $J$  = 7.2 Hz, 4H), 1.38 (t,  $J$  = 7.2 Hz, 6H).  $^{13}\text{C}$  NMR (101 MHz,  $\text{CDCl}_3$ )  $\delta$  166.5, 142.9, 131.9, 129.4, 122.5, 121.8, 118.9, 61.1, 14.3. HRMS (ESI)  $m/z$  calcd for  $\text{C}_{18}\text{H}_{19}\text{NO}_4$  ( $\text{M}+\text{H}$ ) $^+$  314.13868, found 314.13803.

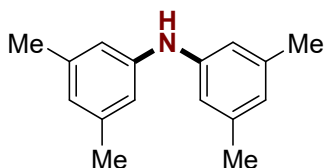

**(3x) bis(3,5-dimethylphenyl)amine (CAS: 5369-25-5)**<sup>22</sup>: Following the General Procedure B with 1-bromo-3,5-dimethylbenzene (55.5 mg, 0.3 mmol), **3x** was obtained as a yellow solid (24.6 mg, 73%). This target product was purified by column chromatography on silica gel (PE/EA = 5:1).

$^1\text{H}$  NMR (400 MHz,  $\text{CDCl}_3$ )  $\delta$  6.68 (s, 4H), 6.57 (s, 2H), 5.49 (s, 1H), 2.26 (s, 12H).  $^{13}\text{C}$  NMR (101 MHz,  $\text{CDCl}_3$ )  $\delta$  143.3, 139.0, 122.7, 115.8, 21.5.

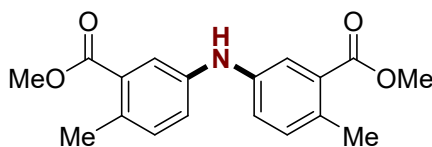

**(3y) dimethyl 5,5'-azanediylbis(2-methylbenzoate):** Following the General Procedure B with methyl 5-bromo-2-methylbenzoate (68.7 mg, 0.3 mmol), **3y** was obtained as a yellow solid (20.7 mg, 44%). This target product was purified by column chromatography on silica gel (PE/EA = 5:1).

$^1\text{H}$  NMR (400 MHz,  $\text{CDCl}_3$ )  $\delta$  7.56 (d,  $J$  = 2.4 Hz, 2H), 7.17 – 7.06 (m, 4H), 5.68 (s, 1H), 3.87 (s, 6H), 2.52 (s, 6H).  $^{13}\text{C}$  NMR (101 MHz,  $\text{CDCl}_3$ )  $\delta$  167.9, 140.9, 132.6, 130.4, 121.4, 120.0, 51.9, 20.9. HRMS (ESI)  $m/z$  calcd for  $\text{C}_{18}\text{H}_{19}\text{NO}_4$  ( $\text{M}+\text{H}$ ) $^+$  314.13868, found 314.13803.

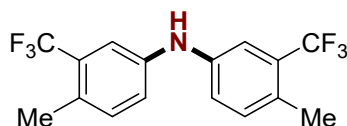

**(3z) bis(4-methyl-3-(trifluoromethyl)phenyl)amine (CAS: 2732894-05-0):** Following the General Procedure B with 4-bromo-1-methyl-2-(trifluoromethyl)benzene (71.7 mg, 0.3 mmol), **3z** was obtained as a yellow solid (31.0 mg, 62%). This target product was purified by column chromatography on silica gel (PE/EA = 5:1).

$^1\text{H}$  NMR (400 MHz,  $\text{CDCl}_3$ )  $\delta$  7.25 (d,  $J$  = 2.4 Hz, 2H), 7.17 (d,  $J$  = 8.0 Hz, 2H), 7.11 – 7.06 (dm, 2H), 5.70 (s, 1H), 2.41 (s, 6H).  $^{13}\text{C}$  NMR (101 MHz,  $\text{CDCl}_3$ )  $\delta$  140.7, 133.0, 129.9 (q,  $J$  = 29.9 Hz), 129.1 (d,  $J$  = 1.7 Hz), 124.3 (q,  $J$  = 274.8 Hz) 120.6, 115.5 (q,  $J$  = 5.8 Hz), 18.5 (d,  $J$  = 2.0 Hz).

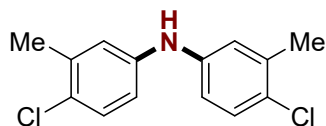

**(3za) bis(4-chloro-3-methylphenyl)amine:** Following the General Procedure B with 4-bromo-1-chloro-2-methylbenzene (61.7 mg, 0.3 mmol), **3za** was obtained as a yellow solid (26.8 mg, 67%). This target product was purified by column chromatography on silica gel (PE/EA = 5:1).  $^1\text{H}$  NMR (400 MHz,  $\text{CDCl}_3$ )  $\delta$  7.20 (d,  $J$  = 8.4 Hz, 2H), 6.88 (d,  $J$  = 2.4 Hz, 2H), 6.80 (dd,  $J$  = 8.4, 2.4 Hz, 2H), 5.52 (s, 1H), 2.32 (s, 6H).  $^{13}\text{C}$  NMR (101 MHz,  $\text{CDCl}_3$ )  $\delta$  141.6, 137.0, 129.7, 126.3, 120.3, 116.7, 20.3.

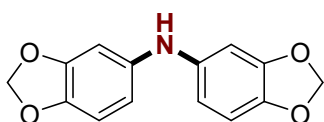

**(3zb) bis(benzo[d][1,3]dioxol-5-yl)amine (CAS: 941689-87-8)<sup>24</sup>:** Following the General Procedure B with 5-bromobenzo[d][1,3]dioxole (60.3 mg, 0.3 mmol), **3zb** was obtained as a yellow solid (16.2 mg, 42%). This target product was purified by column chromatography on silica gel (PE/EA = 5:1).  $^1\text{H}$  NMR (400 MHz,  $\text{CDCl}_3$ )  $\delta$  6.70 (d,  $J$  = 8.4 Hz, 2H), 6.57 (d,  $J$  = 2.4 Hz, 2H), 6.42 (dd,  $J$  = 8.4, 2.4 Hz, 2H), 5.91 (s, 4H), 5.31 (s, 1H).  $^{13}\text{C}$  NMR (101 MHz,  $\text{CDCl}_3$ )  $\delta$  148.3, 142.2, 139.1, 110.9, 108.6, 100.99, 100.95. HRMS (ESI)  $m/z$  calcd for  $\text{C}_{14}\text{H}_{11}\text{NO}_4$  ( $\text{M}+\text{H}$ )<sup>+</sup> 252.07608, found 252.07556.

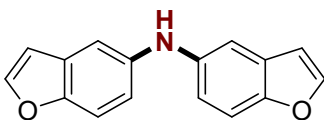

**(3zc) di(benzofuran-5-yl)amine (CAS: 2254556-98-2):** Following the General Procedure B with 5-bromobenzofuran (59.1 mg, 0.3 mmol), **3zc** was obtained as a yellow solid (21.3 mg, 57%). This target product was purified by column chromatography on silica gel (PE/EA = 5:1).  $^1\text{H}$  NMR (400 MHz,  $\text{CDCl}_3$ )  $\delta$  7.58 (d,  $J$  = 2.0 Hz, 2H), 7.40 (d,  $J$  = 8.8 Hz, 2H), 7.24 (d,  $J$  = 2.4 Hz, 2H), 7.00 (dd,  $J$  = 8.8, 2.0 Hz, 2H), 6.66 (d,  $J$  = 1.2 Hz, 2H), 5.58 (s, 1H).  $^{13}\text{C}$  NMR (101 MHz,  $\text{CDCl}_3$ )  $\delta$  150.7, 145.6, 140.2, 128.3, 117.0, 111.9, 109.8, 106.5.

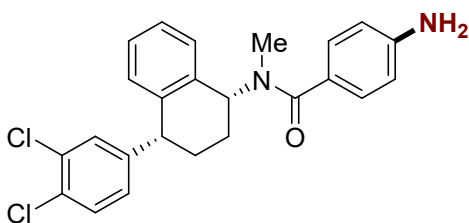

**(4a) 4-amino-N-((1R,4R)-4-(3,4-dichlorophenyl)-1,2,3,4-tetrahydronaphthalen-1-yl)-N-methylbenzamide:** Following the General Procedure A with 4-bromo-N-((1R,4R)-4-(3,4-

dichlorophenyl)-1,2,3,4-tetrahydronaphthalen-1-yl)-N-methylbenzamide (146.8 mg, 0.3 mmol), **4a** was obtained as a yellow solid (90.2 mg, 71%). This target product was purified by column chromatography on silica gel (PE/EA = 2:1).

$^1\text{H}$  NMR (400 MHz,  $\text{CDCl}_3$ )  $\delta$  7.43 – 7.27 (m, 5H), 7.23 – 7.14 (m, 1H), 7.08 (d,  $J$  = 2.0 Hz, 1H), 6.96 (d,  $J$  = 7.6 Hz, 1H), 6.90 – 6.73 (m, 1H), 6.70 – 6.58 (m, 2H), 6.09 – 5.00 (m, 1H), 4.26 – 4.11 (m, 1H), 3.94 (s, 2H), 2.80 (d,  $J$  = 14.0 Hz, 3H), 2.40 – 1.71 (m, 4H).  $^{13}\text{C}$  NMR (101 MHz,  $\text{CDCl}_3$ )  $\delta$  173.2, 172.7, 148.1, 147.0, 146.8, 138.2, 137.7, 136.1, 132.2, 130.9, 130.7, 130.5, 130.0, 129.2, 128.1, 127.9, 127.6, 127.4, 127.2, 126.5, 125.6, 114.3, 114.0, 58.7, 52.9, 43.0, 42.7, 33.3, 23.0, 29.1, 22.4, 20.9, 14.1. HRMS (ESI)  $m/z$  calcd for  $\text{C}_{24}\text{H}_{23}\text{Cl}_2\text{N}_2\text{O}$  ( $\text{M}+\text{H}$ ) $^+$  425.11820, found 425.11873.

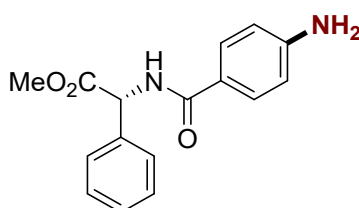

**(4b) methyl (R)-2-(4-aminobenzamido)-2-phenylacetate:** Following the General Procedure A with methyl (R)-2-(4-bromobenzamido)-2-phenylacetate (104.5 mg, 0.3 mmol), **4b** was obtained as a yellow solid (34.1 mg, 40%). This target product was purified by column chromatography on silica gel (PE/EA = 2:1).

$^1\text{H}$  NMR (400 MHz,  $\text{CDCl}_3$ )  $\delta$  7.65 – 7.59 (m, 2H), 7.44 – 7.39 (m, 2H), 7.37 – 7.30 (m, 3H), 7.01 (d,  $J$  = 6.8 Hz, 1H), 6.62 – 6.58 (m, 2H), 5.74 (d,  $J$  = 6.8 Hz, 1H), 4.06 (s, 2H), 3.73 (s, 3H).  $^{13}\text{C}$  NMR (101 MHz,  $\text{CDCl}_3$ )  $\delta$  171.7, 166.3, 150.1, 136.8, 128.88, 128.86, 128.4, 127.3, 122.7, 113.9, 56.6, 52.7. HRMS (ESI)  $m/z$  calcd for  $\text{C}_{16}\text{H}_{17}\text{N}_2\text{O}_3$  ( $\text{M}+\text{H}$ ) $^+$  285.12337, found 285.12361.

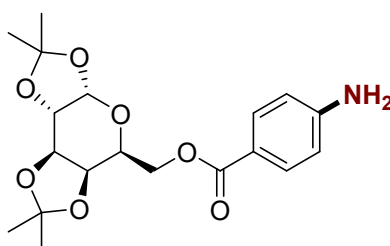

**(4c) ((3aS,5aR,8aR,8bS)-2,2,7,7-tetramethyltetrahydro-5H-bis([1,3]dioxolo)[4,5-b:4',5'-d]pyran-5-yl)methyl 4-aminobenzoate:** Following the General Procedure A with ((3aS,5aR,8aR,8bS)-2,2,7,7-tetramethyltetrahydro-5H-bis([1,3]dioxolo)[4,5-b:4',5'-d]pyran-5-yl)methyl 4-bromobenzoate (133.0 mg, 0.3 mmol), **4c** was obtained as a yellow solid (39.8 mg, 35%). This target product was purified by column chromatography on silica gel (PE/EA = 2:1).

$^1\text{H}$  NMR (400 MHz,  $\text{CDCl}_3$ )  $\delta$  7.85 – 7.80 (m, 2H), 6.62 – 6.56 (m, 2H), 5.54 (d,  $J$  = 4.8 Hz, 1H), 4.62 (dd,  $J$  = 8.0, 2.4 Hz, 1H), 4.46 (dd,  $J$  = 11.2, 4.8 Hz, 1H), 4.38 – 4.27 (m, 3H), 4.17 – 4.07 (m, 3H), 1.49 (s, 3H), 1.45 (s, 3H), 1.33 (s, 3H), 1.31 (s, 3H).  $^{13}\text{C}$  NMR (101 MHz,  $\text{CDCl}_3$ )  $\delta$  166.4, 151.0, 131.7, 119.3, 113.6, 109.5, 108.7, 96.2, 71.1, 70.6, 70.49, 66.2, 63.2, 26.0, 25.9, 24.9, 24.4. HRMS (ESI)  $m/z$  calcd for  $\text{C}_{19}\text{H}_{26}\text{NO}_7$  ( $\text{M}+\text{H}$ ) $^+$  380.17038, found 380.17043.

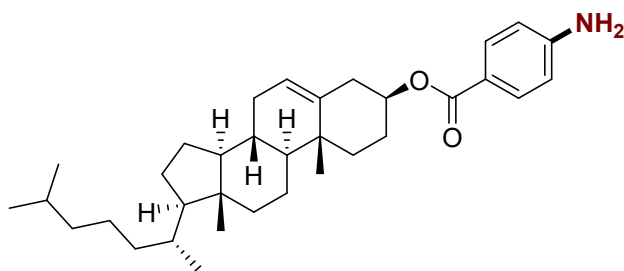

**(4d) (8S,9S,10R,13R,14S,17R)-10,13-dimethyl-17-((R)-6-methylheptan-2-yl)-2,3,4,7,8,9,10,11,12,13,14,15,16,17-tetradecahydro-1H-cyclopenta[a]phenanthren-3-yl 4-aminobenzoate (CAS: 22575-25-3)<sup>25</sup>:** Following the General Procedure A with (8S,9S,10R,13R,14S,17R)-10,13-dimethyl-17-((R)-6-methylheptan-2-yl)-2,3,4,7,8,9,10,11,12,13,14,15,16,17-tetradecahydro-1H-cyclopenta[a]phenanthren-3-yl 4-bromobenzoate (170.9 mg, 0.3 mmol), **4d** was obtained as a yellow solid (95.5 mg, 63%). This target product was purified by column chromatography on silica gel (PE/EA = 2:1).

<sup>1</sup>H NMR (400 MHz, CDCl<sub>3</sub>) δ 7.90 – 7.81 (m, 2H), 6.67 – 6.59 (m, 2H), 5.43 – 5.38 (m, 1H), 4.85 – 4.75 (m, 1H), 4.03 (s, 2H), 2.48 – 2.39 (m, 2H), 2.04 – 1.93 (m, 3H), 1.93 – 1.86 (m, 1H), 1.86 – 1.78 (m, 1H), 1.76 – 1.67 (m, 1H), 1.66 – 1.58 (m, 2H), 1.58 – 1.54 (m, 1H), 1.54 – 1.49 (m, 2H), 1.46 – 1.41 (m, 1H), 1.40 – 1.30 (m, 3H), 1.29 – 1.23 (m, 2H), 1.22 – 1.08 (m, 6H), 1.06 (s, 3H), 1.04 – 0.96 (m, 3H), 0.92 (d, *J* = 6.8 Hz, 3H), 0.87 (dd, *J* = 6.4, 1.6 Hz, 6H), 0.69 (s, 3H). <sup>13</sup>C NMR (101 MHz, CDCl<sub>3</sub>) δ 166.1, 150.6, 139.9, 131.6, 122.6, 120.5, 113.8, 73.9, 56.7, 56.2, 50.1, 42.3, 39.8, 39.5, 38.4, 37.1, 36.7, 36.2, 35.8, 32.0, 31.9, 28.3, 28.03, 27.99, 24.3, 23.9, 22.8, 22.6, 21.1, 19.4, 18.7, 11.9. HRMS (APCI) *m/z* calcd for C<sub>34</sub>H<sub>51</sub>NO<sub>2</sub> (M+H)<sup>+</sup> 506.39926, found 506.39862.

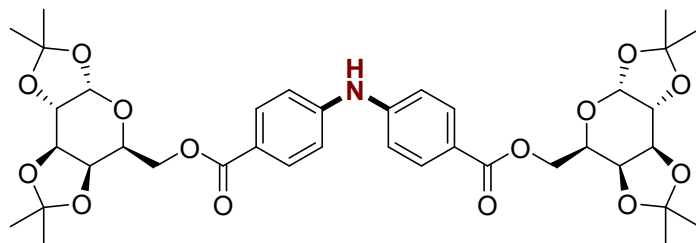

**(4e) ((3aR,5aS,8aS,8bR)-2,2,7,7-tetramethyltetrahydro-5H-bis([1,3]dioxolo)[4,5-b:4',5'-d]pyran-5-yl)methyl 4-(((3aS,5aR,8aR,8bS)-2,2,7,7-tetramethyltetrahydro-5H-bis([1,3]dioxolo)[4,5-b:4',5'-d]pyran-5-yl)methoxy)carbonyl)phenylamino)benzoate:** Following the General Procedure B with ((3aS,5aR,8aR,8bS)-2,2,7,7-tetramethyltetrahydro-5H-bis([1,3]dioxolo)[4,5-b:4',5'-d]pyran-5-yl)methyl 4-bromobenzoate (133.0 mg, 0.3 mmol), **4e** was obtained as a yellow solid (49.0 mg, 44%). This target product was purified by column chromatography on silica gel (PE/EA = 2:1).

<sup>1</sup>H NMR (400 MHz, CDCl<sub>3</sub>) δ 7.97 (d, *J* = 8.4 Hz, 4H), 7.13 (d, *J* = 8.8 Hz, 4H), 6.67 (s, 1H), 5.57 (d, *J* = 4.8 Hz, 2H), 4.66 (dd, *J* = 7.6, 2.4 Hz, 2H), 4.53 (d, *J* = 4.8 Hz, 1H), 4.50 (d, *J* = 4.8 Hz, 1H), 4.42 (d, *J* = 7.6 Hz, 1H), 4.40 (d, *J* = 7.6 Hz, 1H), 4.37 – 4.33 (m, 3H), 4.32 (d, *J* = 2.0 Hz, 1H), 4.22 – 4.16 (m, 2H), 1.50 (d, *J* = 18.4 Hz, 12H), 1.35 (d, *J* = 9.6 Hz, 12H). <sup>13</sup>C NMR (101 MHz, CDCl<sub>3</sub>) δ 166.1, 146.0, 131.6, 122.8, 116.9, 109.7, 108.8, 96.3, 71.2, 70.7, 70.6, 66.3, 63.7, 26.1, 26.0, 25.0, 24.5. HRMS (APCI) *m/z* calcd for C<sub>42</sub>H<sub>39</sub>NO<sub>6</sub> (M-H)<sup>-</sup> 740.29238, found 740.29297.

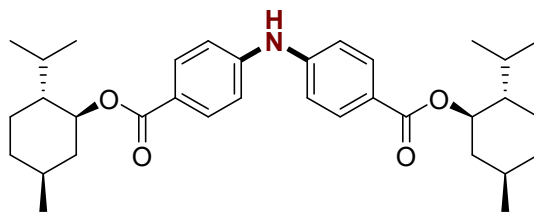

**(4f) (1R,2S,5R)-2-isopropyl-5-methylcyclohexyl 4-((4-(((1S,2R,5S)-2-isopropyl-5-methylcyclohexyl) oxy)carbonyl)phenyl)amino)benzoate:** Following the General Procedure B with (1S,2R,5S)-2-isopropyl-5-methylcyclohexyl 4-bromobenzoate (101.8 mg, 0.3 mmol), **4f** was obtained as a yellow solid (55.2 mg, 69%). This target product was purified by column chromatography on silica gel (PE/EA = 2:1).

$^1\text{H}$  NMR (400 MHz,  $\text{CDCl}_3$ )  $\delta$  7.98 (d,  $J$  = 8.4 Hz, 4H), 7.14 (d,  $J$  = 8.4 Hz, 4H), 6.55 (s, 1H), 4.91 (td,  $J$  = 10.8, 4.4 Hz, 2H), 2.16 – 2.07 (m, 2H), 2.01 – 1.91 (m, 2H), 1.72 (d,  $J$  = 11.2 Hz, 4H), 1.60 – 1.48 (m, 4H), 1.19 – 1.04 (m, 4H), 0.98 – 0.86 (m, 14H), 0.80 (d,  $J$  = 7.2 Hz, 6H).  $^{13}\text{C}$  NMR (101 MHz,  $\text{CDCl}_3$ )  $\delta$  165.8, 145.8, 131.4, 123.7, 116.9, 74.5, 47.3, 41.1, 34.4, 31.5, 26.6, 23.7, 22.1, 20.8, 16.6. HRMS (APCI)  $m/z$  calcd for  $\text{C}_{34}\text{H}_{47}\text{NO}_4$  (M-H) $^-$  532.34323, found 532.34344.

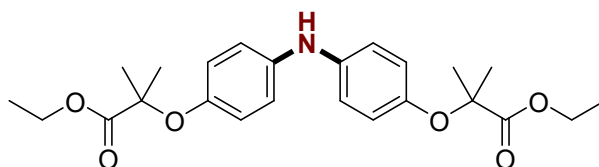

**(4g) diethyl 2,2'-((azanediylbis(4,1-phenylene))bis(oxy))bis(2-methylpropanoate):** Following the General Procedure B with ethyl 2-(4-bromophenoxy)-2-methylpropanoate (86.1 mg, 0.3 mmol), **4g** was obtained as a yellow solid (21.3 mg, 33%). This target product was purified by column chromatography on silica gel (PE/EA = 2:1).

$^1\text{H}$  NMR (400 MHz,  $\text{CDCl}_3$ )  $\delta$  6.90 – 6.85 (m, 4H), 6.82 – 6.77 (m, 4H), 5.40 (s, 1H), 4.24 (q,  $J$  = 7.2 Hz, 4H), 1.55 (s, 12H), 1.28 (t,  $J$  = 7.2 Hz, 6H).  $^{13}\text{C}$  NMR (101 MHz,  $\text{CDCl}_3$ )  $\delta$  174.4, 149.4, 139.0, 121.4, 118.6, 79.6, 61.3, 25.3, 14.1. HRMS (APCI)  $m/z$  calcd for  $\text{C}_{24}\text{H}_{31}\text{NO}_6$  (M+H) $^+$  430.22241, found 430.22192.

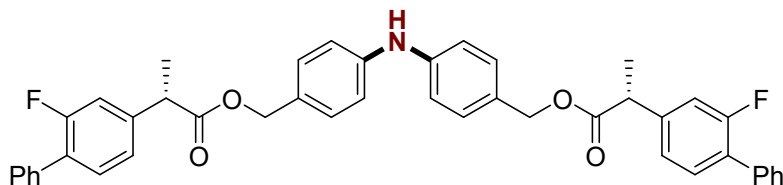

**(4h) 4-((4-(((R)-2-(2-fluoro-[1,1'-biphenyl]-4-yl)propanoyl)oxy)methyl)phenyl)amino)benzyl (S)-2-(2-fluoro-[1,1'-biphenyl]-4-yl)propanoate:** Following the General Procedure B with 4-bromobenzyl (S)-2-(2-fluoro-[1,1'-biphenyl]-4-yl)propanoate (124.0 mg, 0.3 mmol), **4h** was obtained as a yellow solid (35.8 mg, 35%). This target product was purified by column chromatography on silica gel (PE/EA = 2:1).

$^1\text{H}$  NMR (400 MHz,  $\text{CDCl}_3$ )  $\delta$  7.55 – 7.49 (m, 4H), 7.45 – 7.39 (m, 4H), 7.39 – 7.32 (m, 4H), 7.20 – 7.07 (m, 8H), 7.03 – 6.97 (m, 4H), 5.77 (s, 1H), 5.06 (d,  $J$  = 23.2, 12.0 Hz, 4H), 3.78 (q,  $J$  = 7.2 Hz, 2H), 1.54 (d,  $J$  = 7.2 Hz, 6H).  $^{13}\text{C}$  NMR (101 MHz,  $\text{CDCl}_3$ )  $\delta$  173.9, 159.7 (d,  $J$  = 248.3

Hz), 142.9, 141.8 (d,  $J = 7.7$  Hz), 135.5, 130.8 (d,  $J = 3.9$  Hz), 129.8, 129.0 (d,  $J = 2.9$  Hz), 128.5, 128.3, 127.8 (d,  $J = 13.6$  Hz), 127.7, 123.6 (d,  $J = 3.3$  Hz), 117.6, 115.3 (d,  $J = 23.7$  Hz), 66.7, 45.1, 18.4. HRMS (APCI)  $m/z$  calcd for  $C_{44}H_{37}F_2NO_4$  ( $M+H$ )<sup>+</sup> 682.27634, found 682.27539.

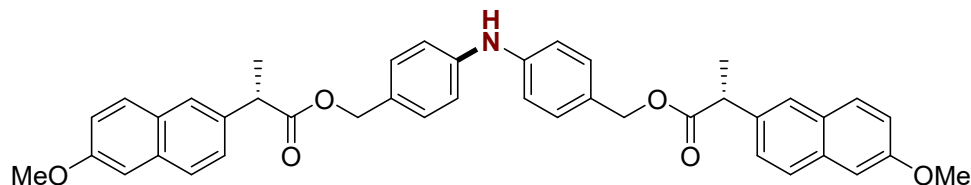

**(4i) 4-((4-(((R)-2-(6-methoxynaphthalen-2-yl)propanoyl)oxy)methyl)phenyl)amino)benzyl (S)-2-(6-methoxynaphthalen-2-yl)propanoate:** Following the General Procedure B with 4-bromobenzyl (S)-2-(6-methoxynaphthalen-2-yl)propanoate (119.8 mg, 0.3 mmol), **4i** was obtained as a yellow solid (41.2 mg, 42%). This target product was purified by column chromatography on silica gel (PE/EA = 2:1).

$^1H$  NMR (400 MHz,  $CDCl_3$ )  $\delta$  7.70 – 7.61 (m, 6H), 7.41 – 7.36 (m, 2H), 7.17 – 7.08 (m, 8H), 6.99 – 6.89 (m, 4H), 5.74 (s, 1H), 5.04 (dd,  $J = 28.8, 12.4$  Hz, 4H), 3.89 (s, 6H), 1.58 (d,  $J = 7.2$  Hz, 6H).  $^{13}C$  NMR (101 MHz,  $CDCl_3$ )  $\delta$  174.6, 157.6, 142.8, 135.7, 133.7, 129.7, 129.3, 128.9, 128.5, 127.1, 126.3, 126.0, 119.0, 117.6, 105.6, 66.5, 55.3, 45.5, 18.6. HRMS (APCI)  $m/z$  calcd for  $C_{42}H_{39}NO_6$  ( $M+H$ )<sup>+</sup> 654.28501, found 654.28418.

## 9. Computational methods and details

### 9.1 Computational Methods

All calculations were carried out by using the Gaussian 16 suite of computational programs<sup>26</sup>. The obtained transition states were fully optimized at the DFT level using the B3LYP<sup>27</sup>-D3(BJ) functional, which has been found reliable in calculating the configuration and energy barrier of the organic system.<sup>28</sup> The standard Def2SVP basis set<sup>29</sup> was applied for all atom.<sup>30</sup> Frequencies were analytically computed at the same level of theory to get the thermodynamic corrections and to confirm whether the structures are the corresponding transition states (only one imaginary frequency). All energies were reported in kcal/mol. The most stabilized conformation was reported herein, when several different conformations were obtained. Visualization was completed using CLYview20 software.<sup>31</sup>

### 9.2 Reductive Elimination Energy Barrier from Ni<sup>II</sup> and Ni<sup>III</sup>

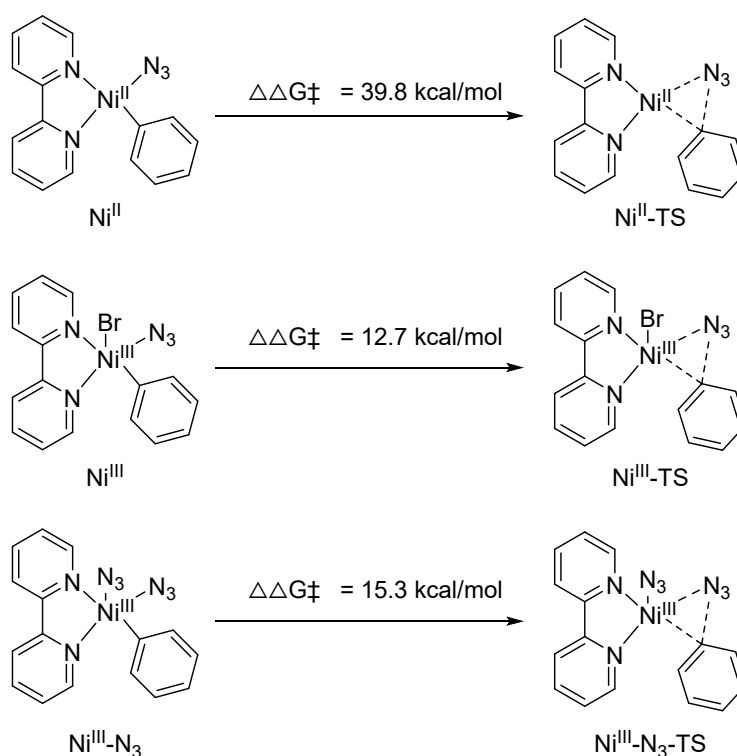

## 10. Cartesian coordinates and energies of calculated structures

### Ni<sup>II</sup>-TS

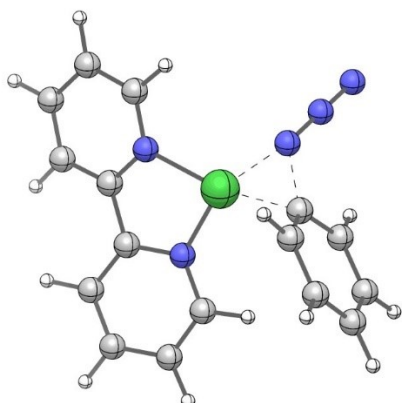

Zero-point correction= 0.262091

Thermal correction to Energy= 0.280111

Thermal correction to Enthalpy= 0.281055

Thermal correction to Gibbs Free Energy= 0.214887

Sum of electronic and thermal Free Energies= -2398.625504

|    |             |             |             |
|----|-------------|-------------|-------------|
| C  | -1.73006400 | 1.45484300  | 0.14410500  |
| C  | -2.26642000 | 2.74646000  | 0.23696100  |
| C  | -1.40972300 | 3.83238200  | 0.38819500  |
| C  | -0.02531800 | 3.60159000  | 0.42996300  |
| C  | 0.44361400  | 2.29874200  | 0.31907200  |
| N  | -0.38199200 | 1.24152300  | 0.19808600  |
| H  | -1.80916300 | 4.84600600  | 0.46038600  |
| H  | -3.34493600 | 2.89581500  | 0.16970600  |
| H  | 0.68274600  | 4.42270300  | 0.55372200  |
| H  | 1.51086700  | 2.07003400  | 0.34427500  |
| C  | -2.51602200 | 0.22897000  | -0.01865400 |
| C  | -3.89146700 | 0.11829900  | 0.23193400  |
| N  | -1.78338200 | -0.84823400 | -0.42855400 |
| C  | -4.52446300 | -1.10654600 | 0.04765400  |
| H  | -4.45222000 | 0.98368000  | 0.58777900  |
| C  | -2.40035700 | -2.03265900 | -0.58875800 |
| C  | -3.76115500 | -2.20778500 | -0.37390800 |
| H  | -5.59416600 | -1.21075200 | 0.24009300  |
| H  | -1.76261800 | -2.85971600 | -0.91246500 |
| H  | -4.21809700 | -3.18500400 | -0.53896300 |
| Ni | 0.14587600  | -0.55564100 | -0.25029100 |
| C  | 2.06678300  | -0.70532300 | -0.13572300 |
| C  | 2.82519400  | -0.28477200 | 1.00091900  |
| C  | 2.45416000  | -0.23084600 | -1.42695100 |
| C  | 3.81167900  | 0.67680800  | 0.85112100  |

|   |            |             |             |
|---|------------|-------------|-------------|
| H | 2.59288600 | -0.69511500 | 1.98622300  |
| C | 3.43486800 | 0.75125100  | -1.54012400 |
| H | 1.97841900 | -0.65302400 | -2.31416100 |
| C | 4.11728800 | 1.22406700  | -0.41164200 |
| H | 4.35917700 | 1.01727100  | 1.73457900  |
| H | 3.69082500 | 1.13685400  | -2.53099600 |
| H | 4.89951400 | 1.97874600  | -0.51120300 |
| N | 1.31477600 | -2.05076400 | -0.16092300 |
| N | 1.55557700 | -2.87062400 | 0.72089700  |
| N | 1.81082900 | -3.66939200 | 1.50109400  |

### Ni<sup>III</sup>-Br-TS

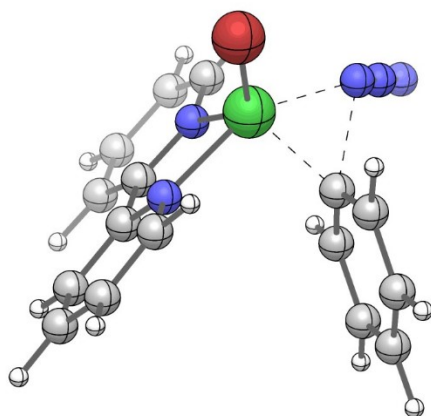

|                                              |              |
|----------------------------------------------|--------------|
| Zero-point correction=                       | 0.276043     |
| Thermal correction to Energy=                | 0.298145     |
| Thermal correction to Enthalpy=              | 0.299089     |
| Thermal correction to Gibbs Free Energy=     | 0.221383     |
| Sum of electronic and thermal Free Energies= | -2562.727774 |

|   |             |             |             |
|---|-------------|-------------|-------------|
| C | -2.16513900 | -0.79696100 | 0.38000000  |
| C | -3.54832100 | -0.99780700 | 0.30700000  |
| C | -4.40568400 | 0.06870300  | 0.57597600  |
| C | -3.86294300 | 1.30668000  | 0.92169100  |
| C | -2.47473400 | 1.43172100  | 0.96973100  |
| N | -1.65449200 | 0.41312000  | 0.69483500  |
| H | -3.95338900 | -1.97594100 | 0.04981500  |
| H | -4.49541900 | 2.16631700  | 1.14691200  |
| H | -2.00480400 | 2.38088600  | 1.23181900  |
| C | -1.16390400 | -1.86782300 | 0.15455500  |
| C | -1.48521600 | -3.18102500 | -0.20814800 |
| N | 0.11503200  | -1.49580700 | 0.34454000  |
| C | -0.45315500 | -4.10506300 | -0.37266700 |
| H | -2.52125100 | -3.48148400 | -0.36204900 |
| C | 1.10815600  | -2.37467100 | 0.20057600  |

|    |             |             |             |
|----|-------------|-------------|-------------|
| C  | 0.86590000  | -3.70009100 | -0.16216000 |
| H  | 2.10929400  | -1.98579300 | 0.40677300  |
| H  | 1.69900100  | -4.39551100 | -0.27484700 |
| Ni | 0.42887200  | 0.50488500  | 0.63492500  |
| C  | 0.75121100  | 0.88489100  | -1.28751600 |
| C  | -0.28022700 | 0.77066000  | -2.22561700 |
| C  | 2.08006100  | 0.59672400  | -1.62729500 |
| C  | 0.01254700  | 0.25827500  | -3.49343900 |
| H  | -1.30140500 | 1.06421900  | -1.97493100 |
| C  | 2.35114400  | 0.08057200  | -2.89593900 |
| H  | 2.87093000  | 0.75587800  | -0.89261400 |
| C  | 1.32231600  | -0.09873400 | -3.82999400 |
| H  | -0.79352900 | 0.14208800  | -4.22283000 |
| H  | 3.38144800  | -0.17196300 | -3.16013600 |
| N  | 0.62584200  | 2.37225100  | -0.06342300 |
| H  | 1.54491700  | -0.49440200 | -4.82335400 |
| H  | -5.48756200 | -0.06960700 | 0.52149000  |
| H  | -0.68037800 | -5.13398300 | -0.65974800 |
| N  | -0.25109200 | 3.09882300  | -0.47989300 |
| N  | -1.05848600 | 3.80844200  | -0.88787800 |
| Br | 2.32211500  | 0.28652600  | 2.10108600  |

### Ni<sup>III</sup>-N<sub>3</sub>-TS

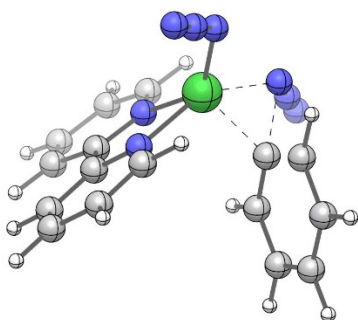

Zero-point correction= 0.263870 (Hartree/Particle)

Thermal correction to Energy= 0.284463

Thermal correction to Enthalpy= 0.285408

Thermal correction to Gibbs Free Energy= 0.211311

Sum of electronic and thermal Free Energies= -4972.570786

|   |             |             |             |
|---|-------------|-------------|-------------|
| C | -1.92163500 | -1.19716700 | -0.24213400 |
| C | -3.18038200 | -1.65034500 | -0.65561900 |
| C | -4.30775700 | -0.88044100 | -0.37376200 |
| C | -4.15389100 | 0.31986000  | 0.32159200  |
| C | -2.86951800 | 0.70621100  | 0.70144500  |
| N | -1.78666100 | -0.02620000 | 0.41816900  |

|    |             |             |             |
|----|-------------|-------------|-------------|
| H  | -3.28201200 | -2.59665000 | -1.18569300 |
| H  | -5.00802700 | 0.95204800  | 0.56785300  |
| H  | -2.70166100 | 1.63598400  | 1.24692900  |
| C  | -0.66273200 | -1.94617500 | -0.47278500 |
| C  | -0.58807700 | -3.14278700 | -1.19401400 |
| N  | 0.44152100  | -1.38782200 | 0.06254900  |
| C  | 0.65341200  | -3.75853900 | -1.35566600 |
| H  | -1.48167500 | -3.58846500 | -1.62984500 |
| C  | 1.63398900  | -1.96676600 | -0.09762700 |
| C  | 1.78531700  | -3.16291500 | -0.79995200 |
| H  | 2.48987800  | -1.46202700 | 0.35140300  |
| H  | 2.77490300  | -3.61028100 | -0.90145200 |
| Ni | 0.16526500  | 0.41590400  | 0.99407900  |
| C  | 0.93324800  | 1.48899000  | -0.47560100 |
| C  | 0.28871800  | 1.52154900  | -1.71740900 |
| C  | 2.33007400  | 1.56092000  | -0.37907400 |
| C  | 1.06299000  | 1.52425500  | -2.88147000 |
| H  | -0.80153300 | 1.52705600  | -1.78068700 |
| C  | 3.08626000  | 1.55849500  | -1.55285900 |
| H  | 2.80065200  | 1.60221900  | 0.60427900  |
| C  | 2.45996400  | 1.53192500  | -2.80589700 |
| H  | 0.56574800  | 1.52178900  | -3.85512600 |
| H  | 4.17695900  | 1.58950800  | -1.48561600 |
| N  | 0.06208600  | 2.42583700  | 0.95995100  |
| H  | 3.05861600  | 1.53844900  | -3.71931200 |
| H  | -5.29669900 | -1.21852700 | -0.69026200 |
| H  | 0.73292600  | -4.69370500 | -1.91389400 |
| N  | 1.35019300  | 0.17955400  | 2.52760600  |
| N  | 2.09624200  | -0.74018600 | 2.72245900  |
| N  | 2.83249300  | -1.61157600 | 2.92251900  |
| N  | -0.80736100 | 3.10888400  | 0.46102900  |
| N  | -1.61070900 | 3.78220600  | -0.01111000 |

## 11. Reference

- 1 L. Wang, T. Wang, G.-J. Cheng, X. Li, J.-J. Wei, B. Guo, C. Zheng, G. Chen, C. Ran and C. Zheng, *ACS Catal.*, 2020, **10**, 7543-7551.
- 2 X. Dan, Q. Yang, L. Xing, Y. Tang, W. Wang and Y. Cai, *Org. Lett.*, 2023, **25**, 4124-4129.
- 3 F. Zhu, E. Miller, W. C. Powell, K. Johnson, A. Beggs, G. E. Evenson and M. A. Walczak, *Angew. Chem., Int. Ed.*, 2022, **61**, e202207153.
- 4 G. Song, D.-Z. Nong, Q. Li, Y. Yan, G. Li, J. Fan, W. Zhang, R. Cao, C. Wang, J. Xiao and D. Xue, *ACS Catal.*, 2022, **12**, 15590-15599.
- 5 A. G, P. M. R, U. V and S. K, *New J. Chem.*, 2020, **44**, 1477-1484.
- 6 A. Vijeta, C. Casadevall and E. Reisner, *Angew. Chem., Int. Ed.*, 2022, **61**, e202203176.
- 7 G. Song, J. Song, Q. Li, D. Z. Nong, J. Dong, G. Li, J. Fan, C. Wang, J. Xiao and D. Xue, *Angew. Chem., Int. Ed.*, 2023, **63**, e202314355.
- 8 J. Gao, S. Bhunia, K. Wang, L. Gan, S. Xia and D. Ma, *Org. Lett.*, 2017, **19**, 2809-2812.
- 9 J. Zhao, S. Niu, X. Jiang, Y. Jiang, X. Zhang, T. Sun and D. Ma, *J. Org. Chem.*, 2018, **83**, 6589-6598.
- 10 R. Elancheran, K. Saravanan, B. Choudhury, S. Divakar, S. Kabilan, M. Ramanathan, B. Das, R. Devi and J. Kotoky, *Med. Chem. Res.*, 2016, **25**, 539-552.
- 11 H. Liu, X. He, Z. Chen, J. Zhang, X. Fang, Z. Sun and W. Chu, *Chem. Asian J.*, 2023, **18**, e202300039.
- 12 R. M. Brady, Y. Khakham, G. Lessene and J. B. Baell, *Org. Biomol. Chem.*, 2011, **9**, 656-658.
- 13 H. Yue, L. Guo, X. Liu and M. Rueping, *Org. Lett.*, 2017, **19**, 1788-1791.
- 14 G. E. Martinez, J. W. Nugent and A. R. Fout, *Organometallics*, 2018, **37**, 2941-2944.
- 15 A. N. Desnoyer, F. W. Friese, W. Chiu, M. W. Drover, B. O. Patrick and J. A. Love, *Chemistry*, 2016, **22**, 4070-4077.
- 16 G. Yan and J. E. Golden, *Org. Lett.*, 2018, **20**, 4393-4396.
- 17 Rohan M. Thomas, D. B. Obbard and B. H. Lipshutz, *Chem. Sci.*, 2023, **14**, 13503-13507.
- 18 S. Guo, Y. Wang, C. Sun, J. Li, D. Zou, Y. Wu and Y. Wu, *Tetrahedron Lett.*, 2013, **54**, 3233-3237.
- 19 X. Zhou, K.-C. Lau, B. J. Petro and R. F. Jordan, *Organometallics*, 2014, **33**, 7209-7214.
- 20 Z. Xu, J. Dong, G. Song, F. Kong, G. Li and D. Xue, *Org. Chem. Front.*, 2024, **11**, 2313-2318.
- 21 L. A. Farmer and D. A. Pratt, *J. Org. Chem.*, 2024, **89**, 6126-6137.
- 22 L. Karpova, M. Daniel, R. Kancherla, K. Muralirajan, B. Maity and M. Rueping, *Org. Lett.*, 2024, **26**, 1657-1661.
- 23 E. Koranteng, Z. C. Shu, Y. Y. Liu, Q. Yang, B. Shi, Q. X. Wu, F. Tan, L. Q. Lu and W. J. Xiao, *Chin. J. Chem*, 2023, **42**, 264-270.
- 24 Z. Lei, J. Yao, Y. Xiao, W. H. Liu, L. Yu, W. Duan and C.-J. Li, *Chem. Sci.*, 2024, **15**, 3552-3561.
- 25 X. Liu, M. Lu, X. Guo, H. Xu and J. Xu, *Chem. Eur. J.*, 2023, **29**, e202302041.
- 26 G. W. T. M.J. Frisch, H.B. Schlegel, G.E. Scuseria, M.A. Robb, J.R. Cheeseman, G. Scalmani, V. Barone, G.A. Petersson, H. Nakatsuji, X. Li, M. Caricato, A.V. Marenich, J. Bloino, B.G. Janesko, R. Gomperts, B. Mennucci, H.P. Hratchian, J.V. Ortiz, A. F. Izmaylov, J.L. Sonnenberg, D. Williams-Young, F. Ding, F. Lipparini, F. Egidi, J. Goings, B. Peng, A. Petrone, T. Henderson, D. Ranasinghe, V.G. Zakrzewski, J. Gao, N. Rega, G. Zheng, W. Liang, M. Hada, M. Ehara, K. Toyota, R. Fukuda, J. Hasegawa, M. Ishida, T. Nakajima, Y. Honda, O. Kitao, H. Nakai, T. Vreven, K. Throssell, J.A. Montgomery, J.E. Peralta Jr., F. Ogliaro, M.J. Bearpark, J.J. Heyd, E.N. Brothers, K.N. Kudin, V.N. Staroverov, T.A. Keith, R. Kobayashi, J. Normand, K. Raghavachari, A.P. Rendell, J.C. Burant, S.S. Iyengar, J. Tomasi, M. Cossi, J.M. Millam, M. Klene, C. Adamo, R. Cammi, J.W. Ochterski, R.L. Martin, K. Morokuma, O. Farkas, J.B. Foresman and D.J. Fox, Gaussian 16, Revision A.03; and I. W. Gaussian, CT., 2016.

- 27 (a) C. Lee, W. Yang and R. G. Parr, *Physical Review B*, 1988, **37**, 785-789; (b) A. D. Becke, *J. Chem. Phys.*, 1993, **98**, 5648-5652; (c) A. D. Becke, *Physical Review A*, 1988, **38**, 3098-3100.
- 28 Y. Zhao and D. G. Truhlar, *Acc. Chem. Res.*, 2008, 157-167.
- 29 F. Weigend and R. Ahlrichs, *PCCP*, 2005, **7**.
- 30 (a) P. J. Hay and W. R. Wadt, *J. Chem. Phys.*, 1985, **82**, 270-283; (b) W. R. Wadt and P. J. Hay, *J. Chem. Phys.*, 1985, **82**, 284-298; (c) P. J. Hay and W. R. Wadt, *J. Chem. Phys.*, 1985, 299-310.
- 31 CYLview20 and C. Y. Legault, *Université- de Sherbrooke*, 2020, (<http://www.cylview.org>).

## 12. Copies of NMR spectra

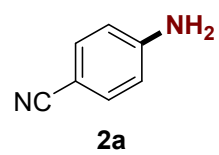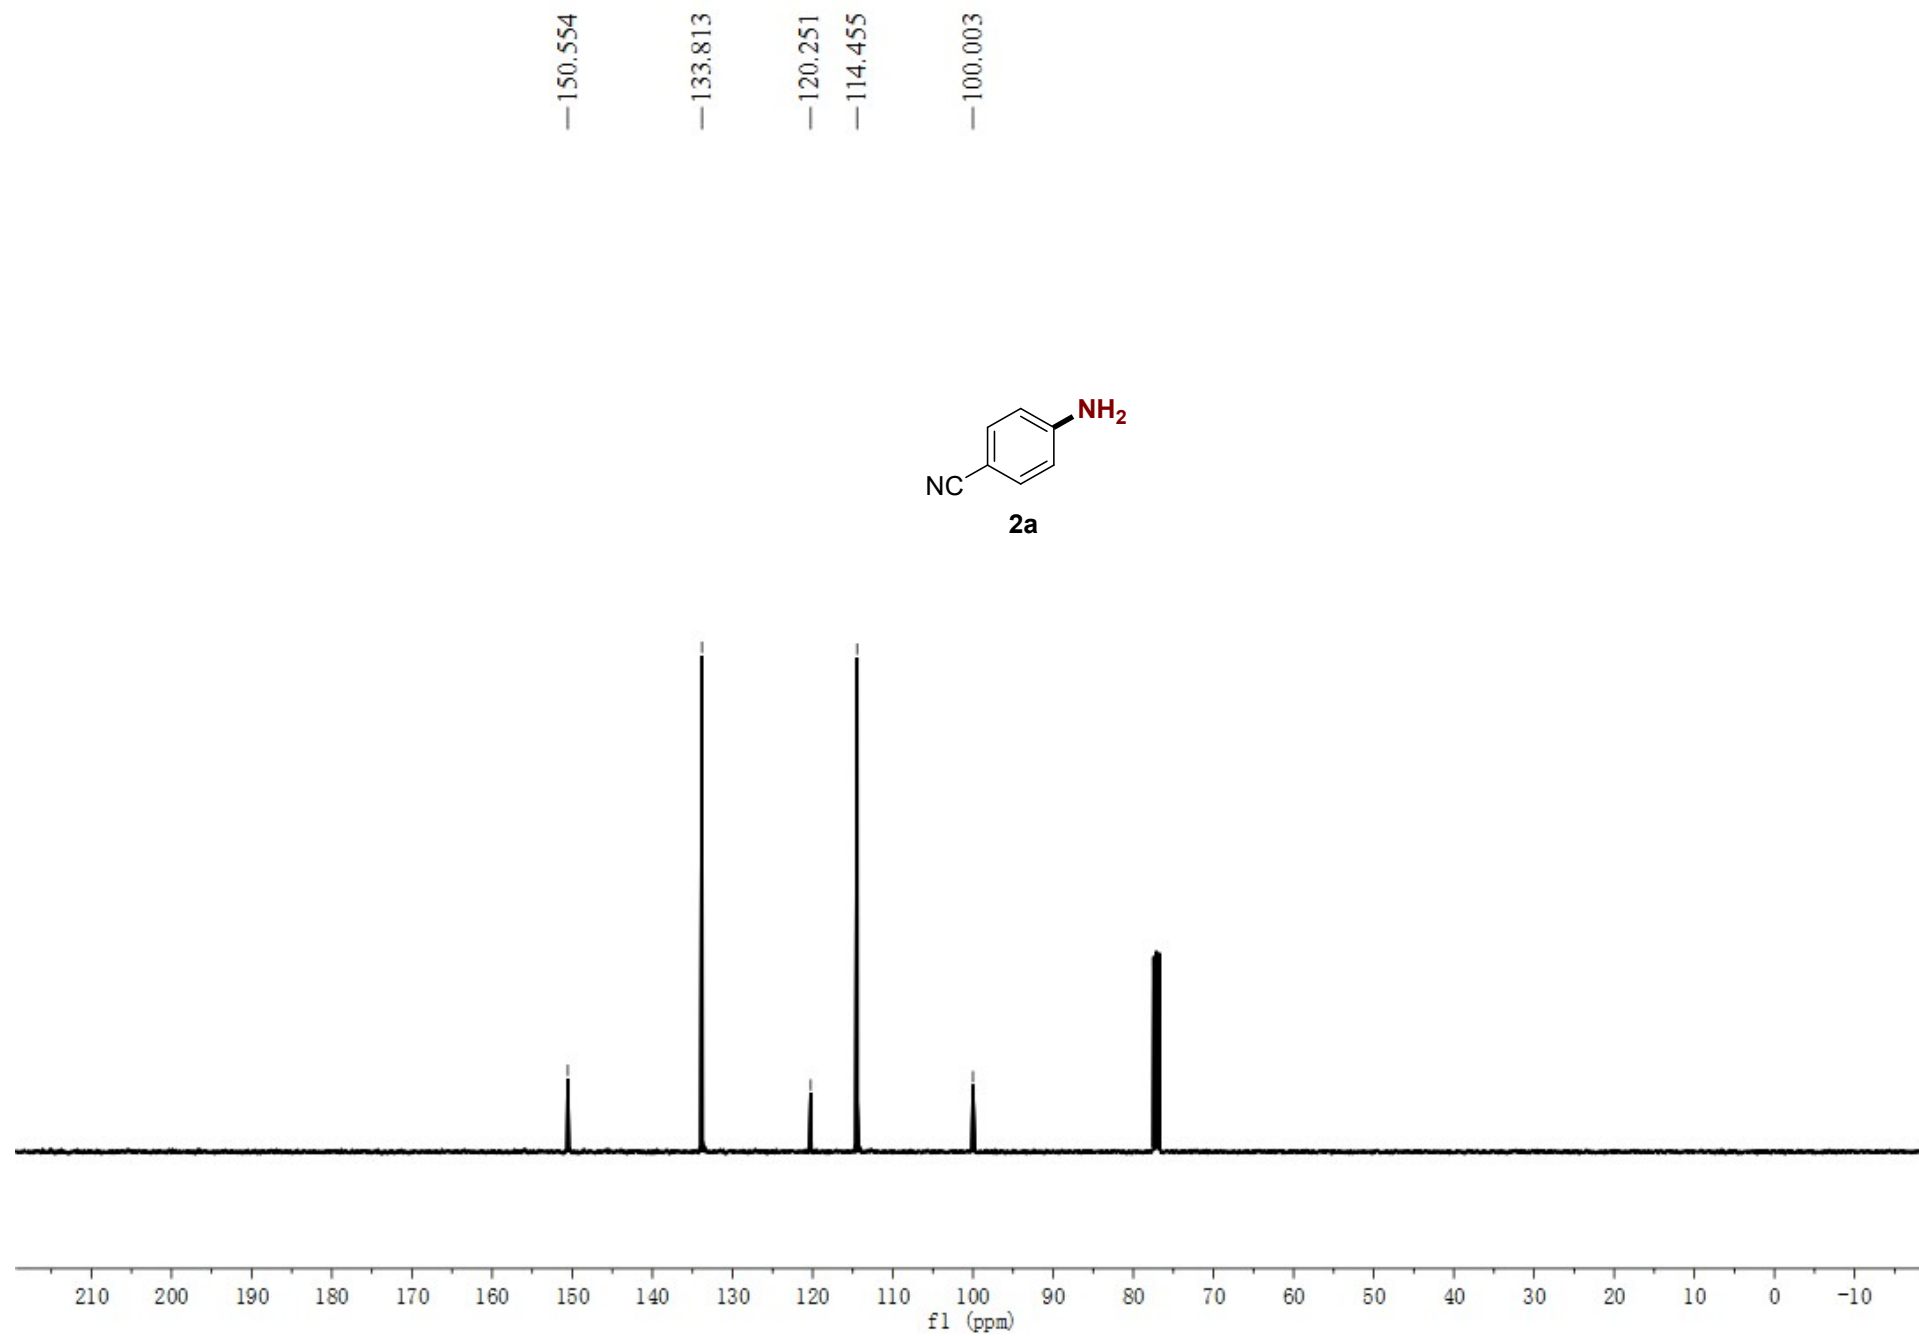

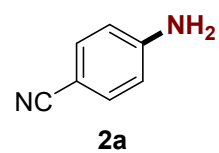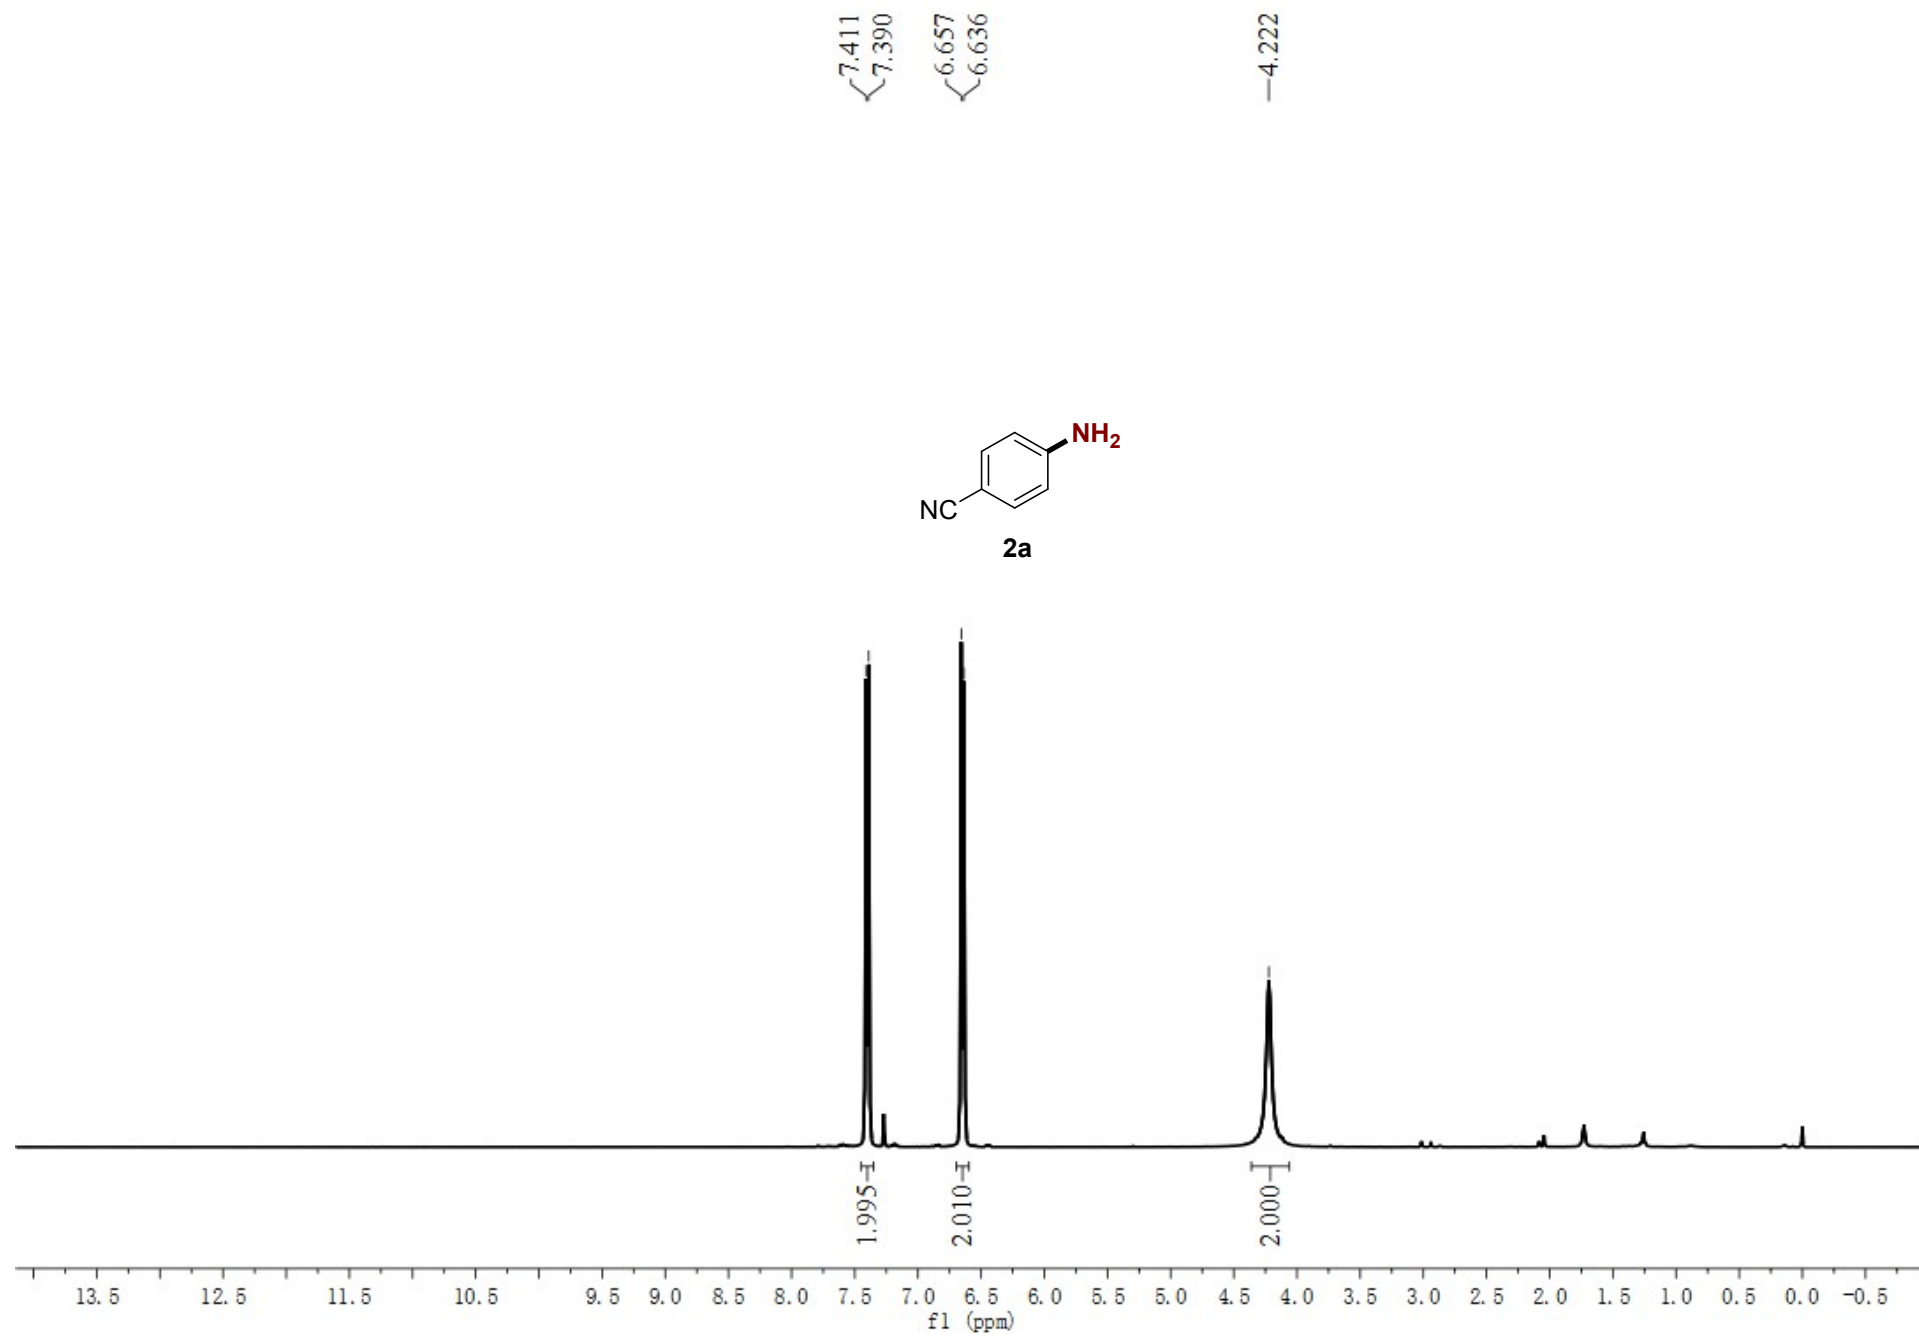

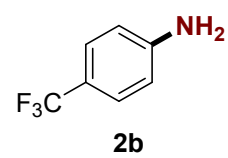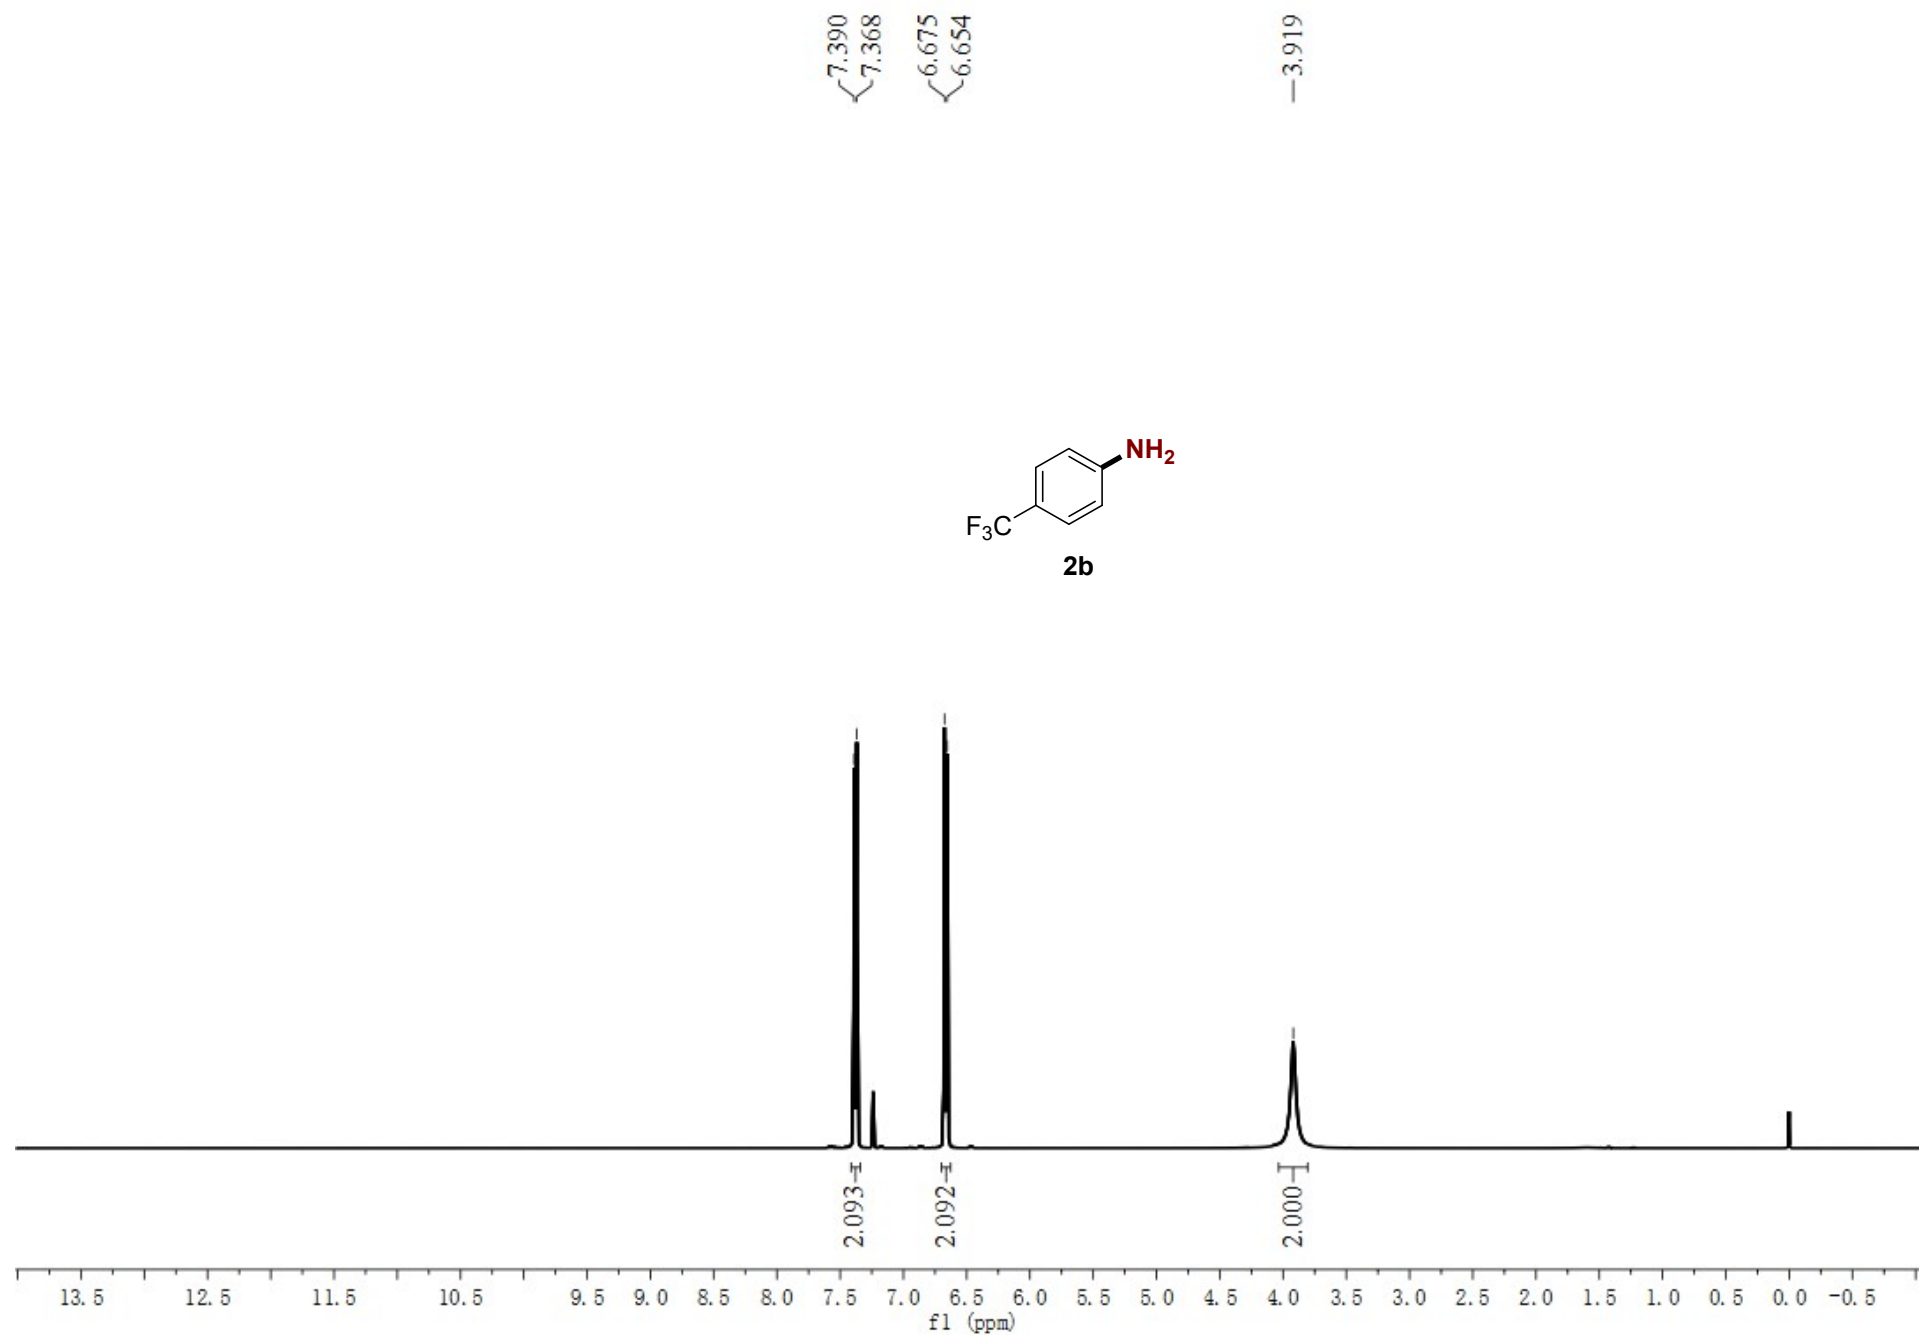

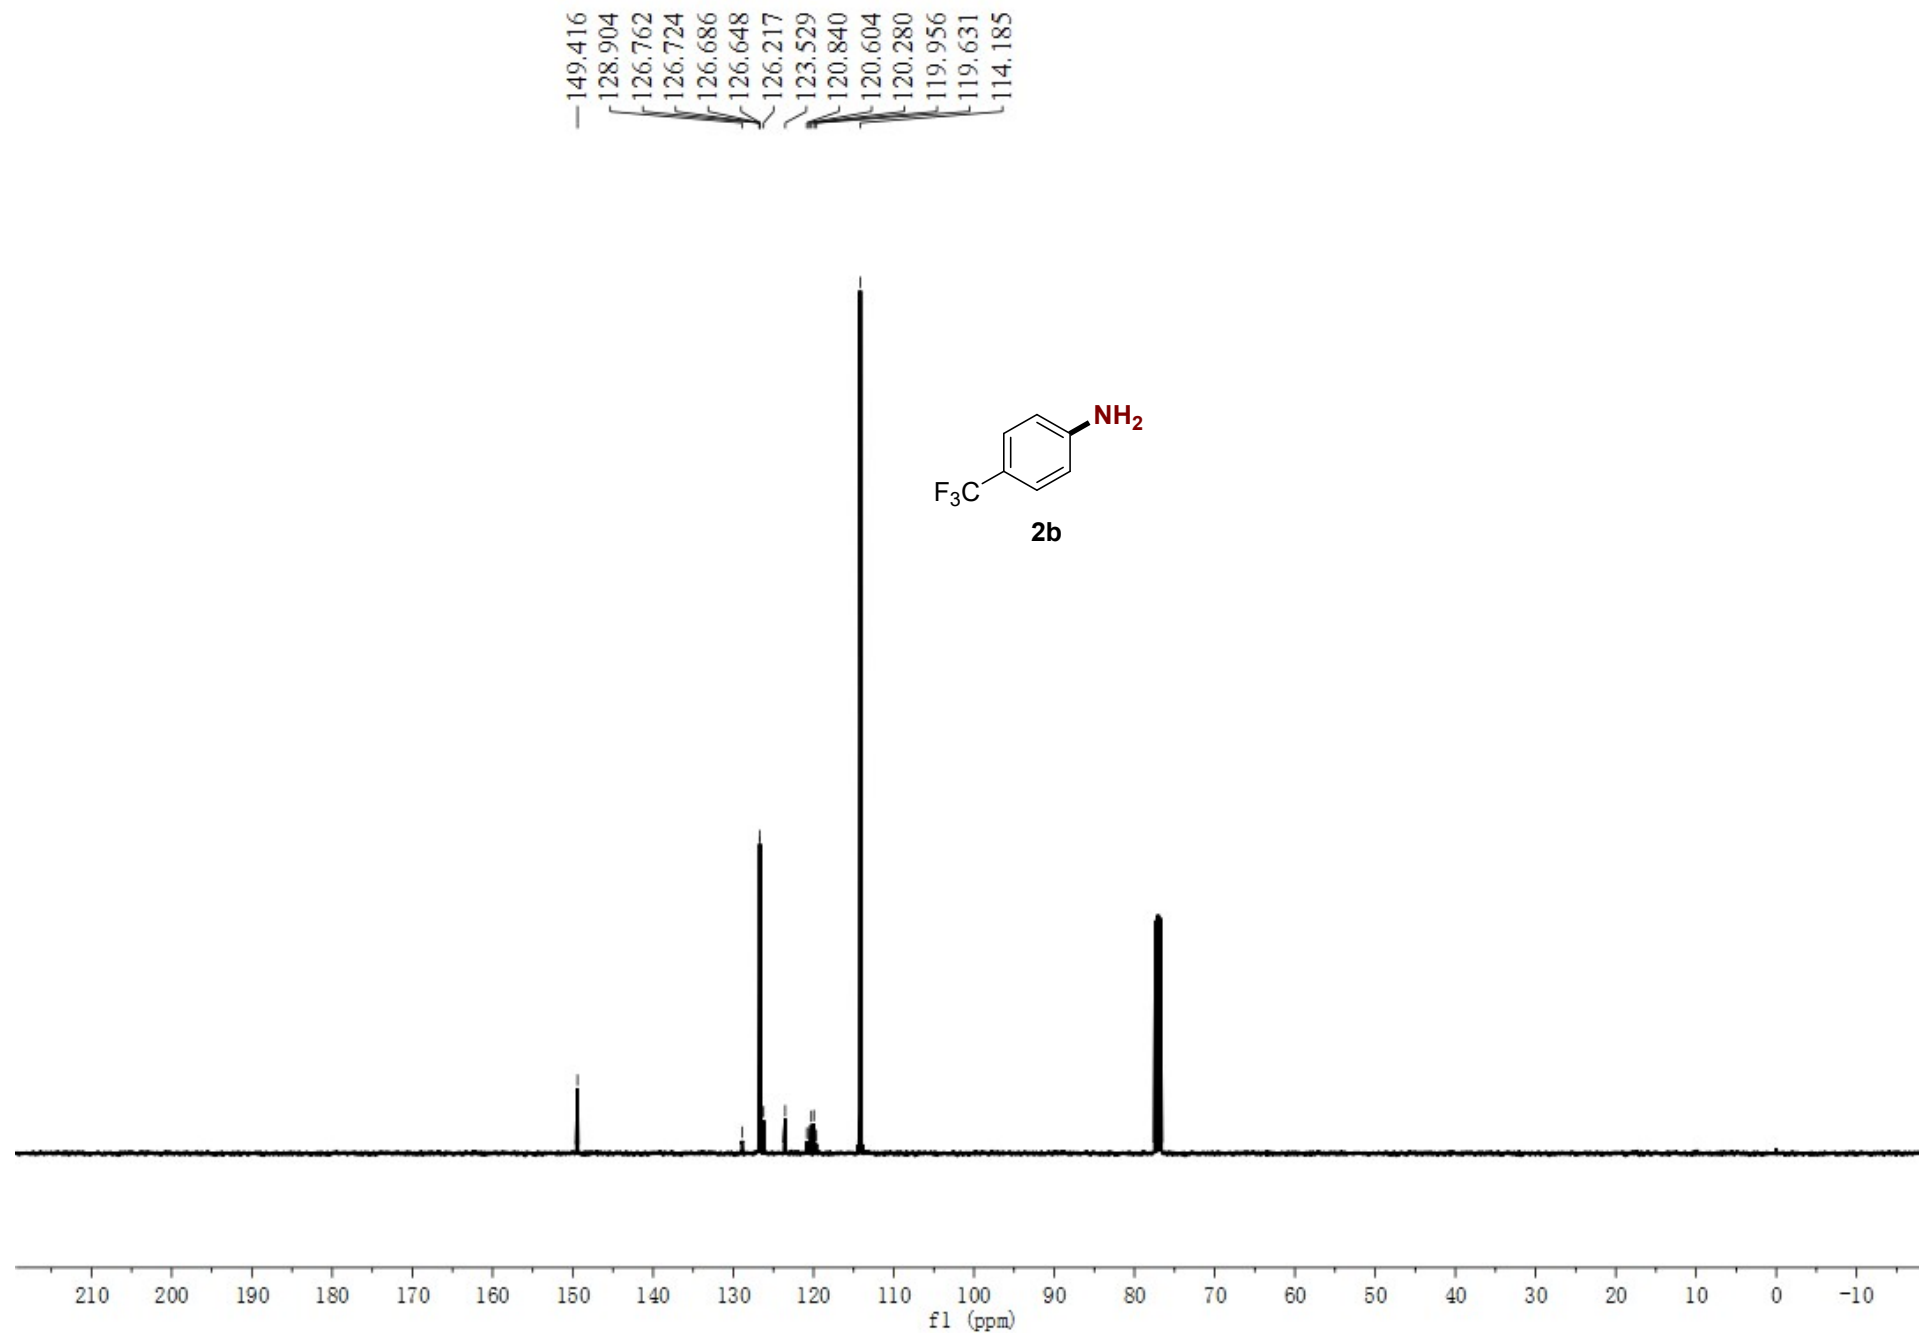

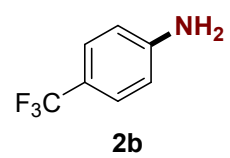

—61.161

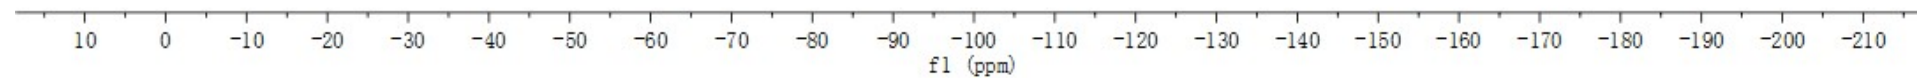

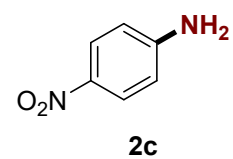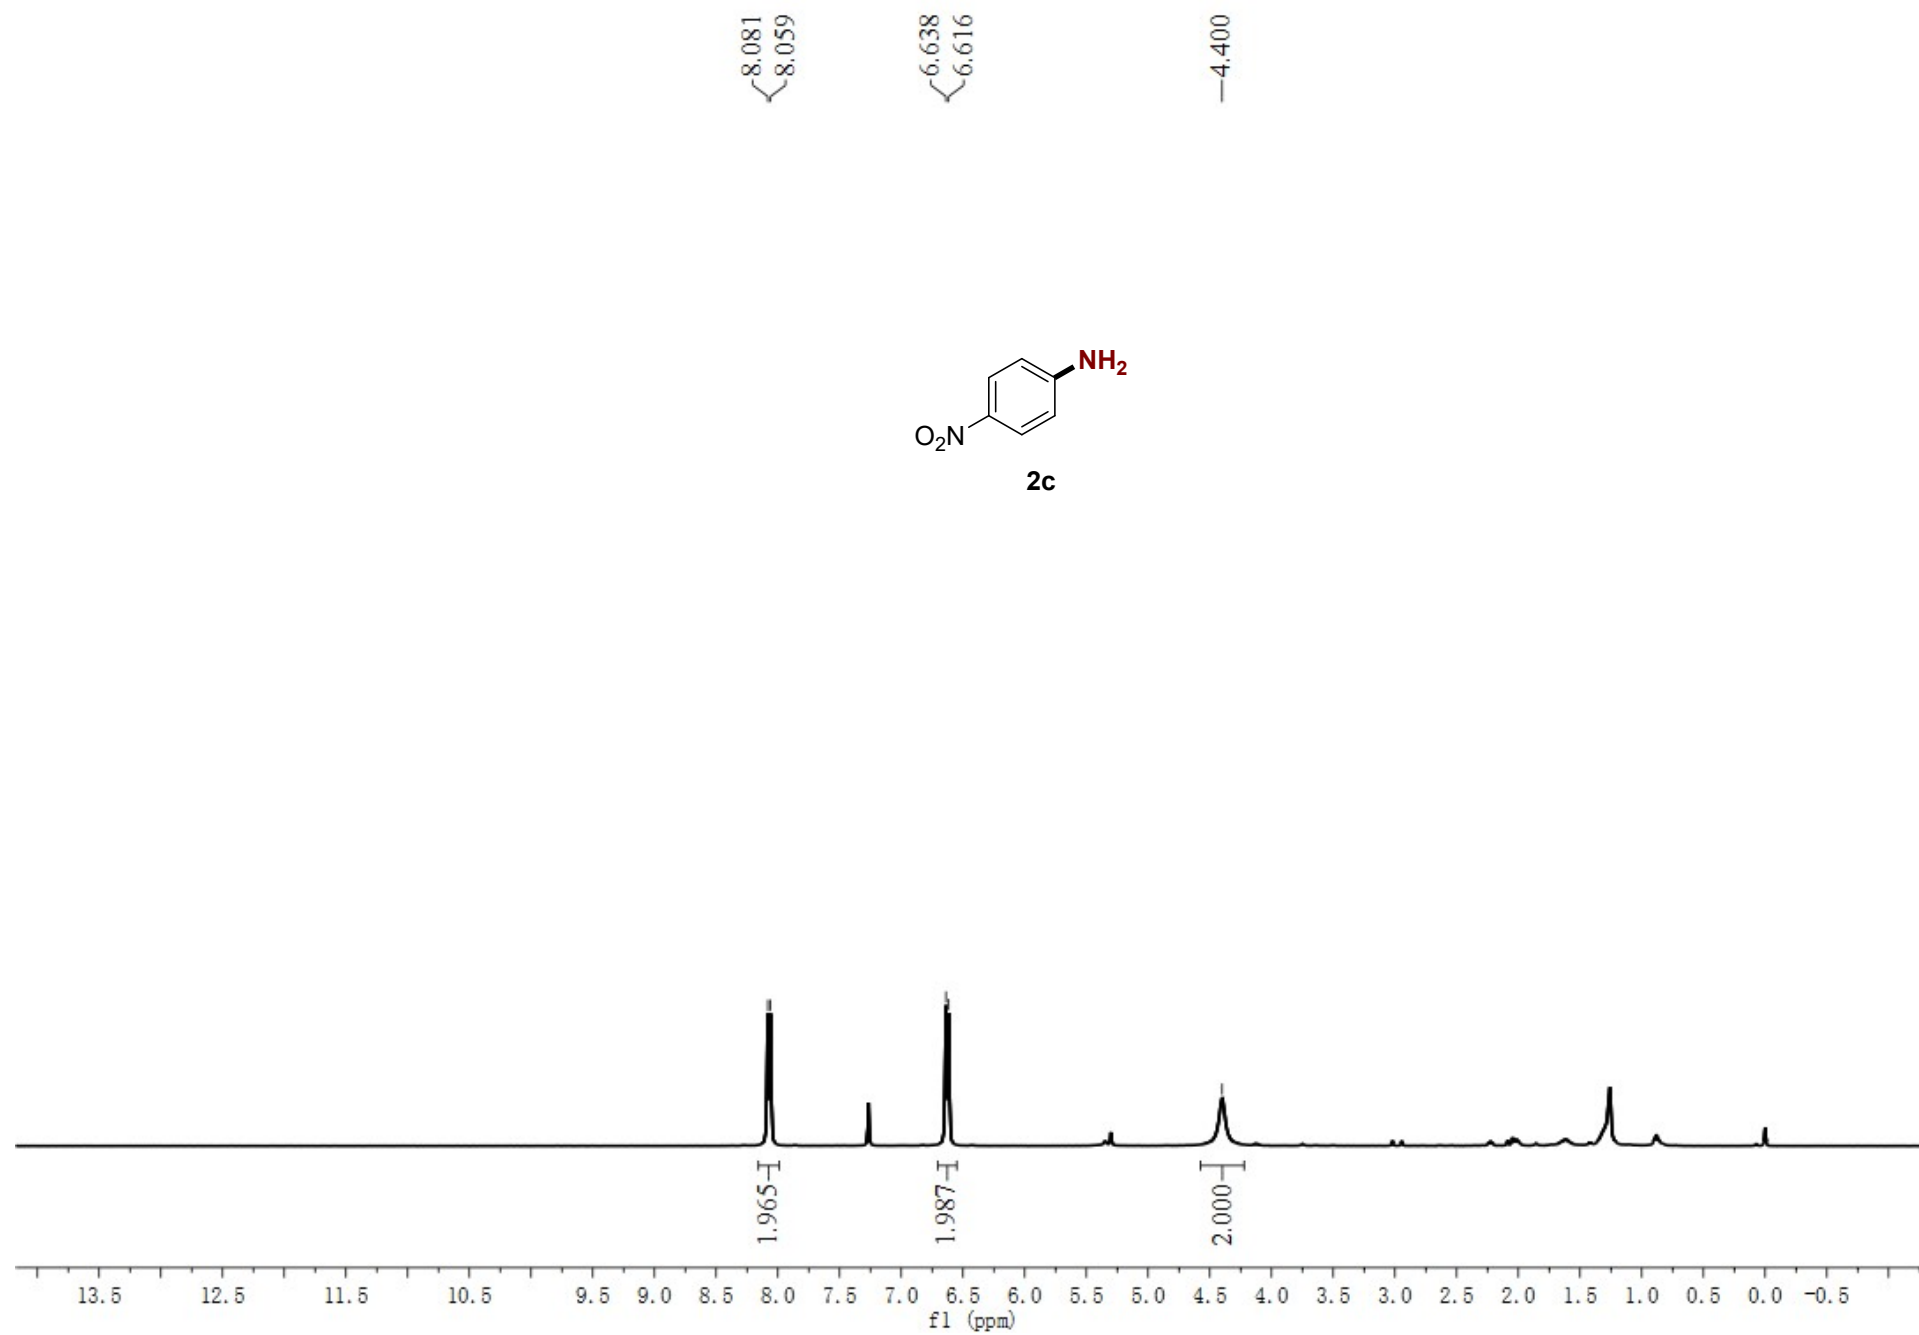

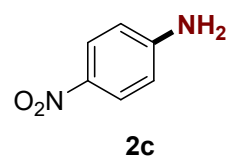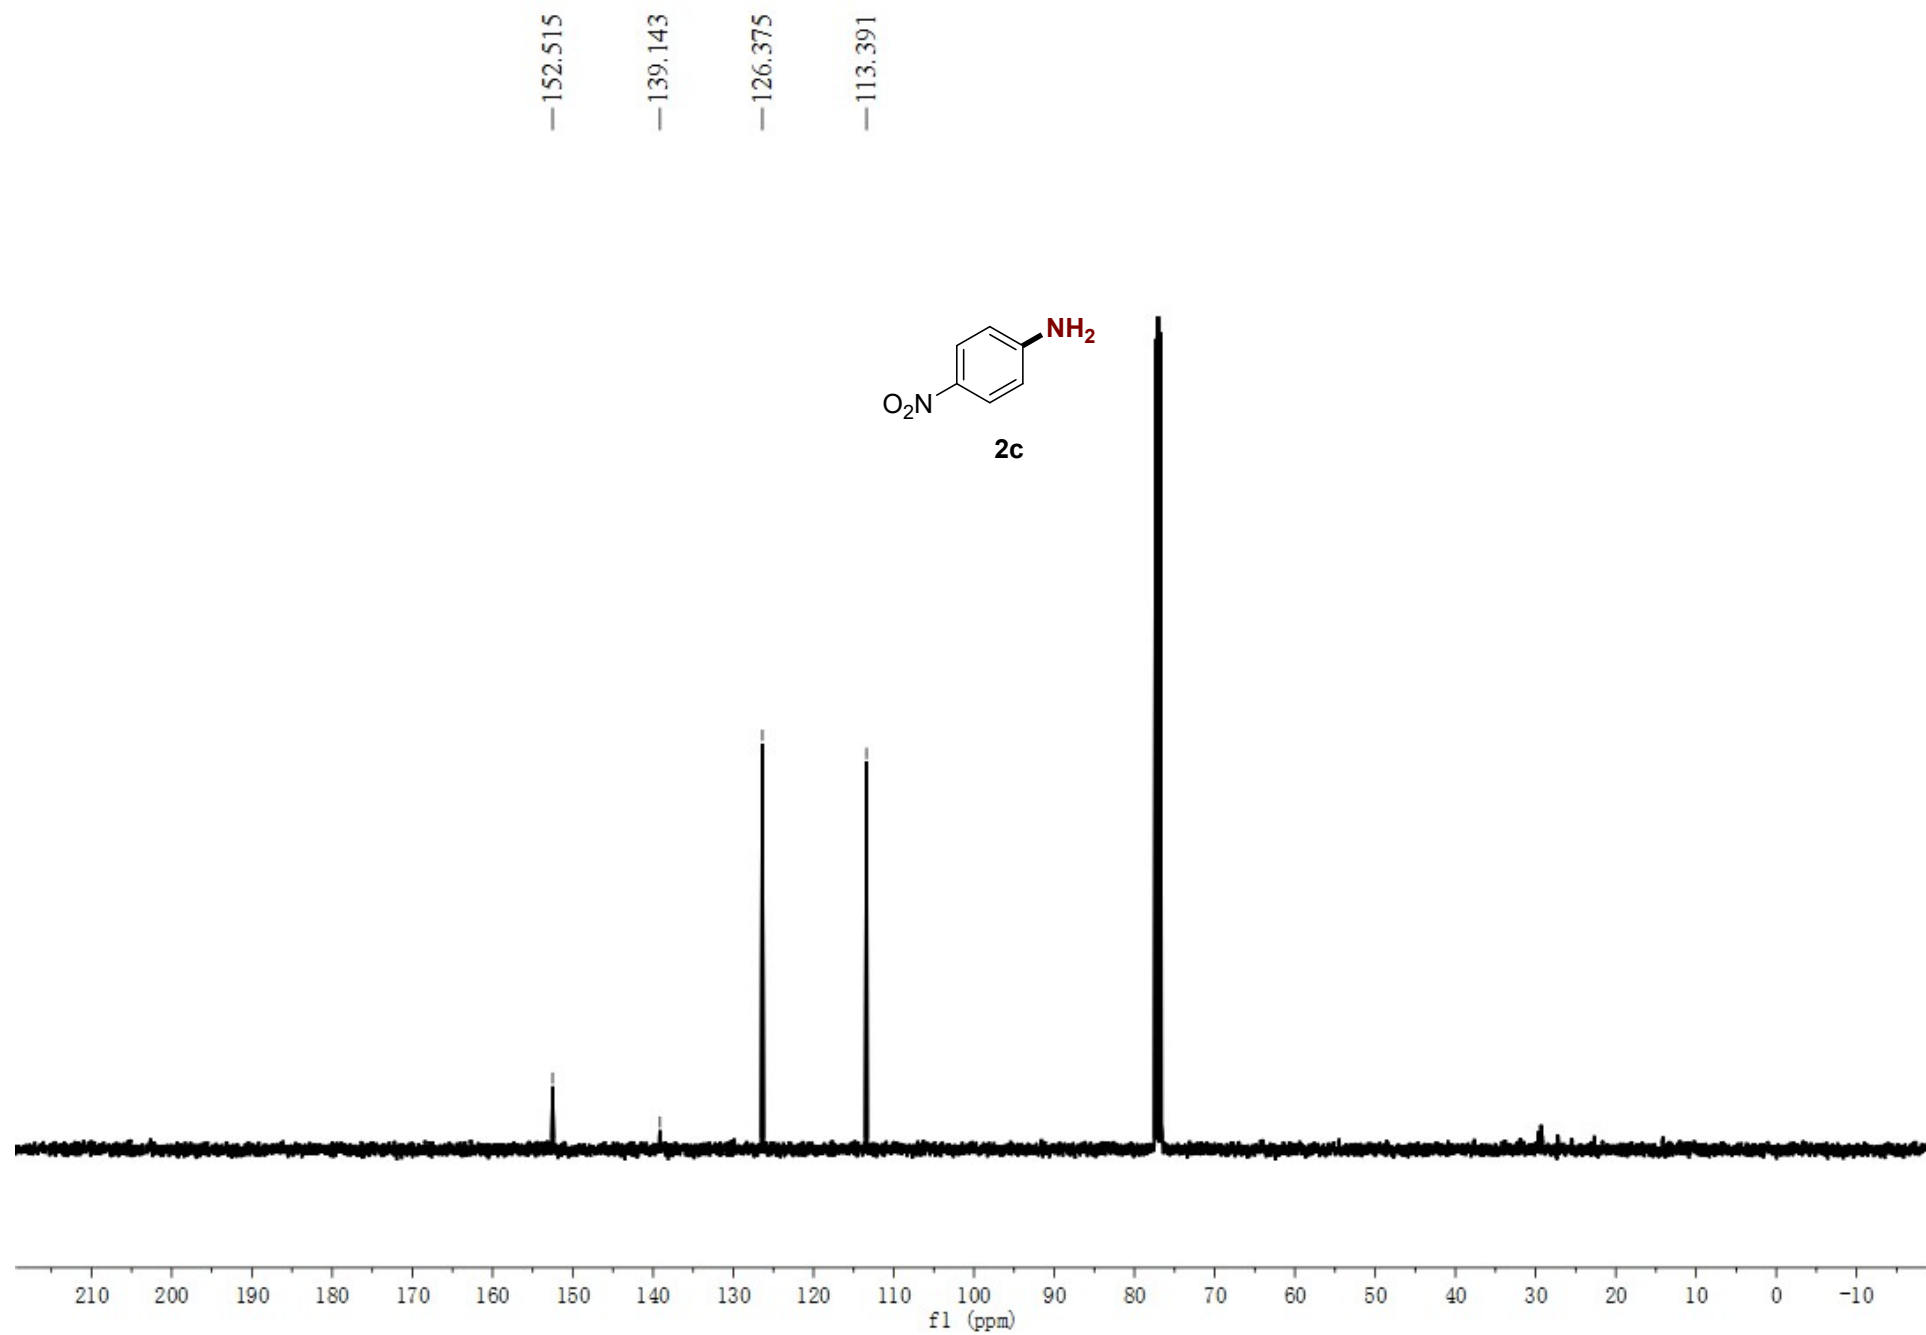

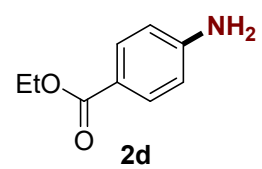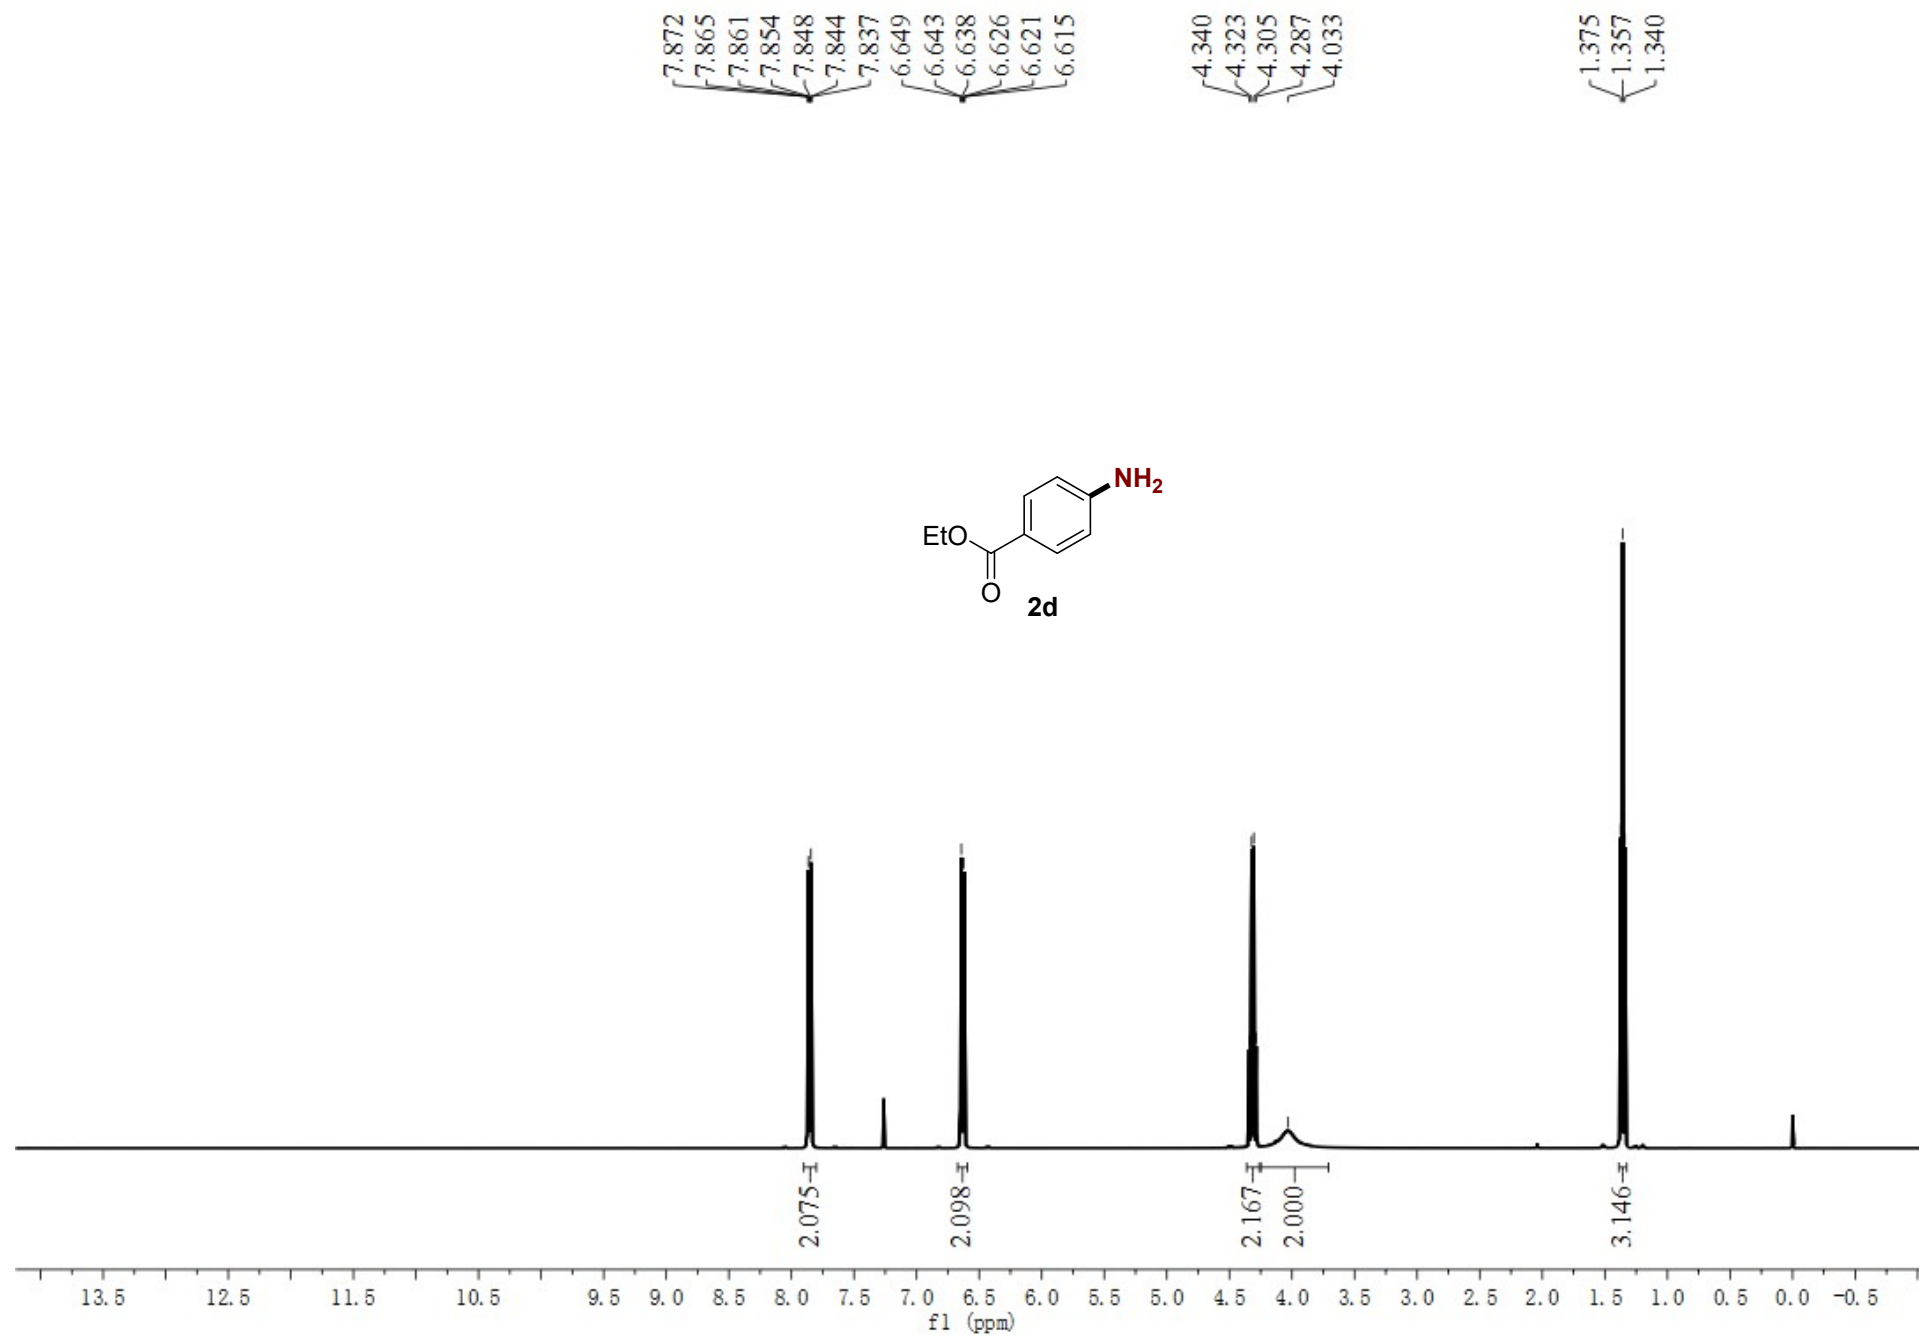

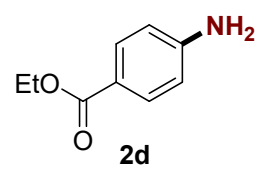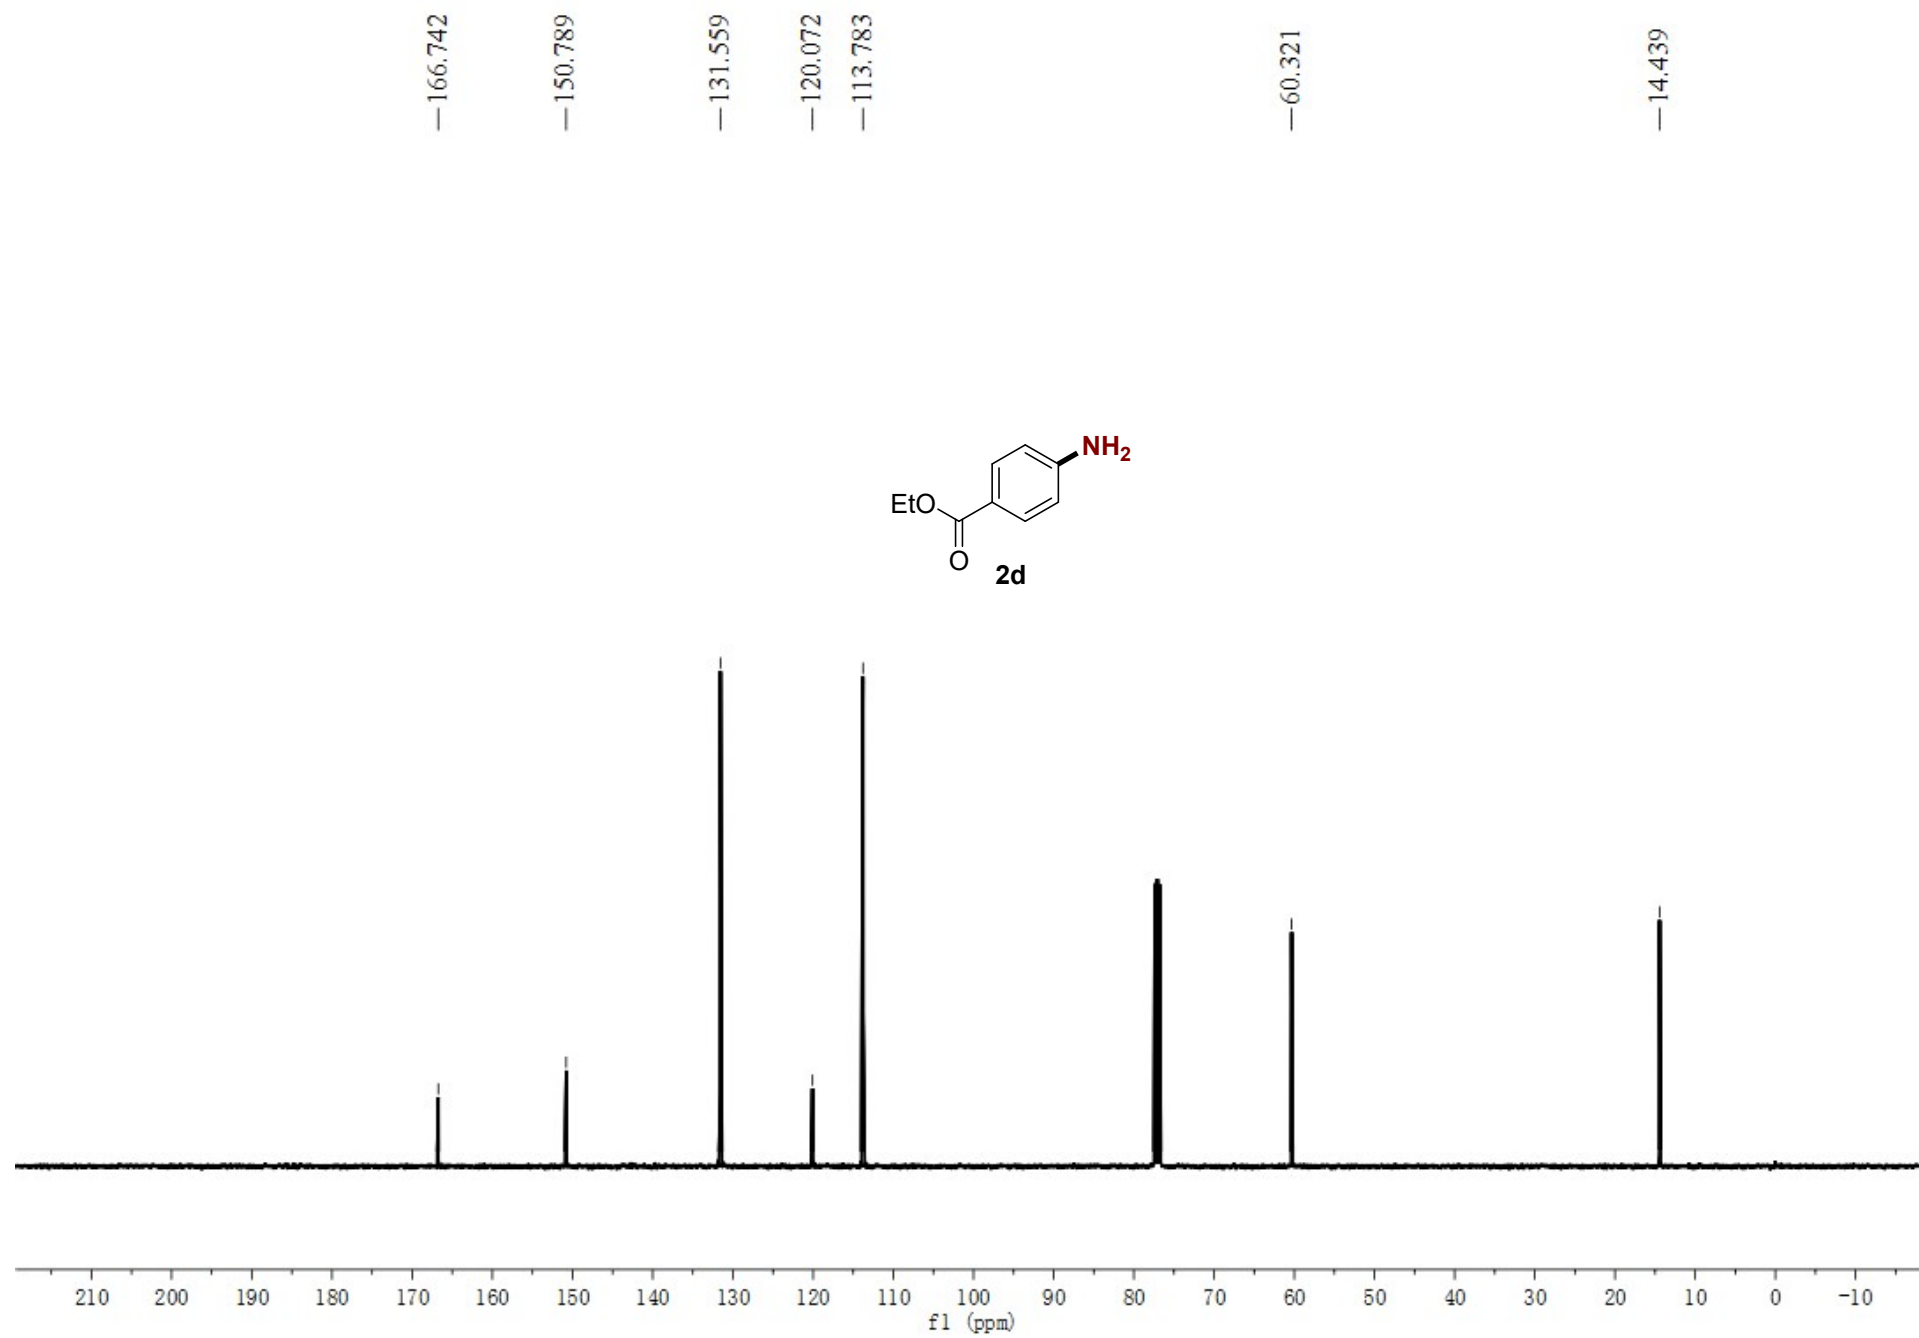

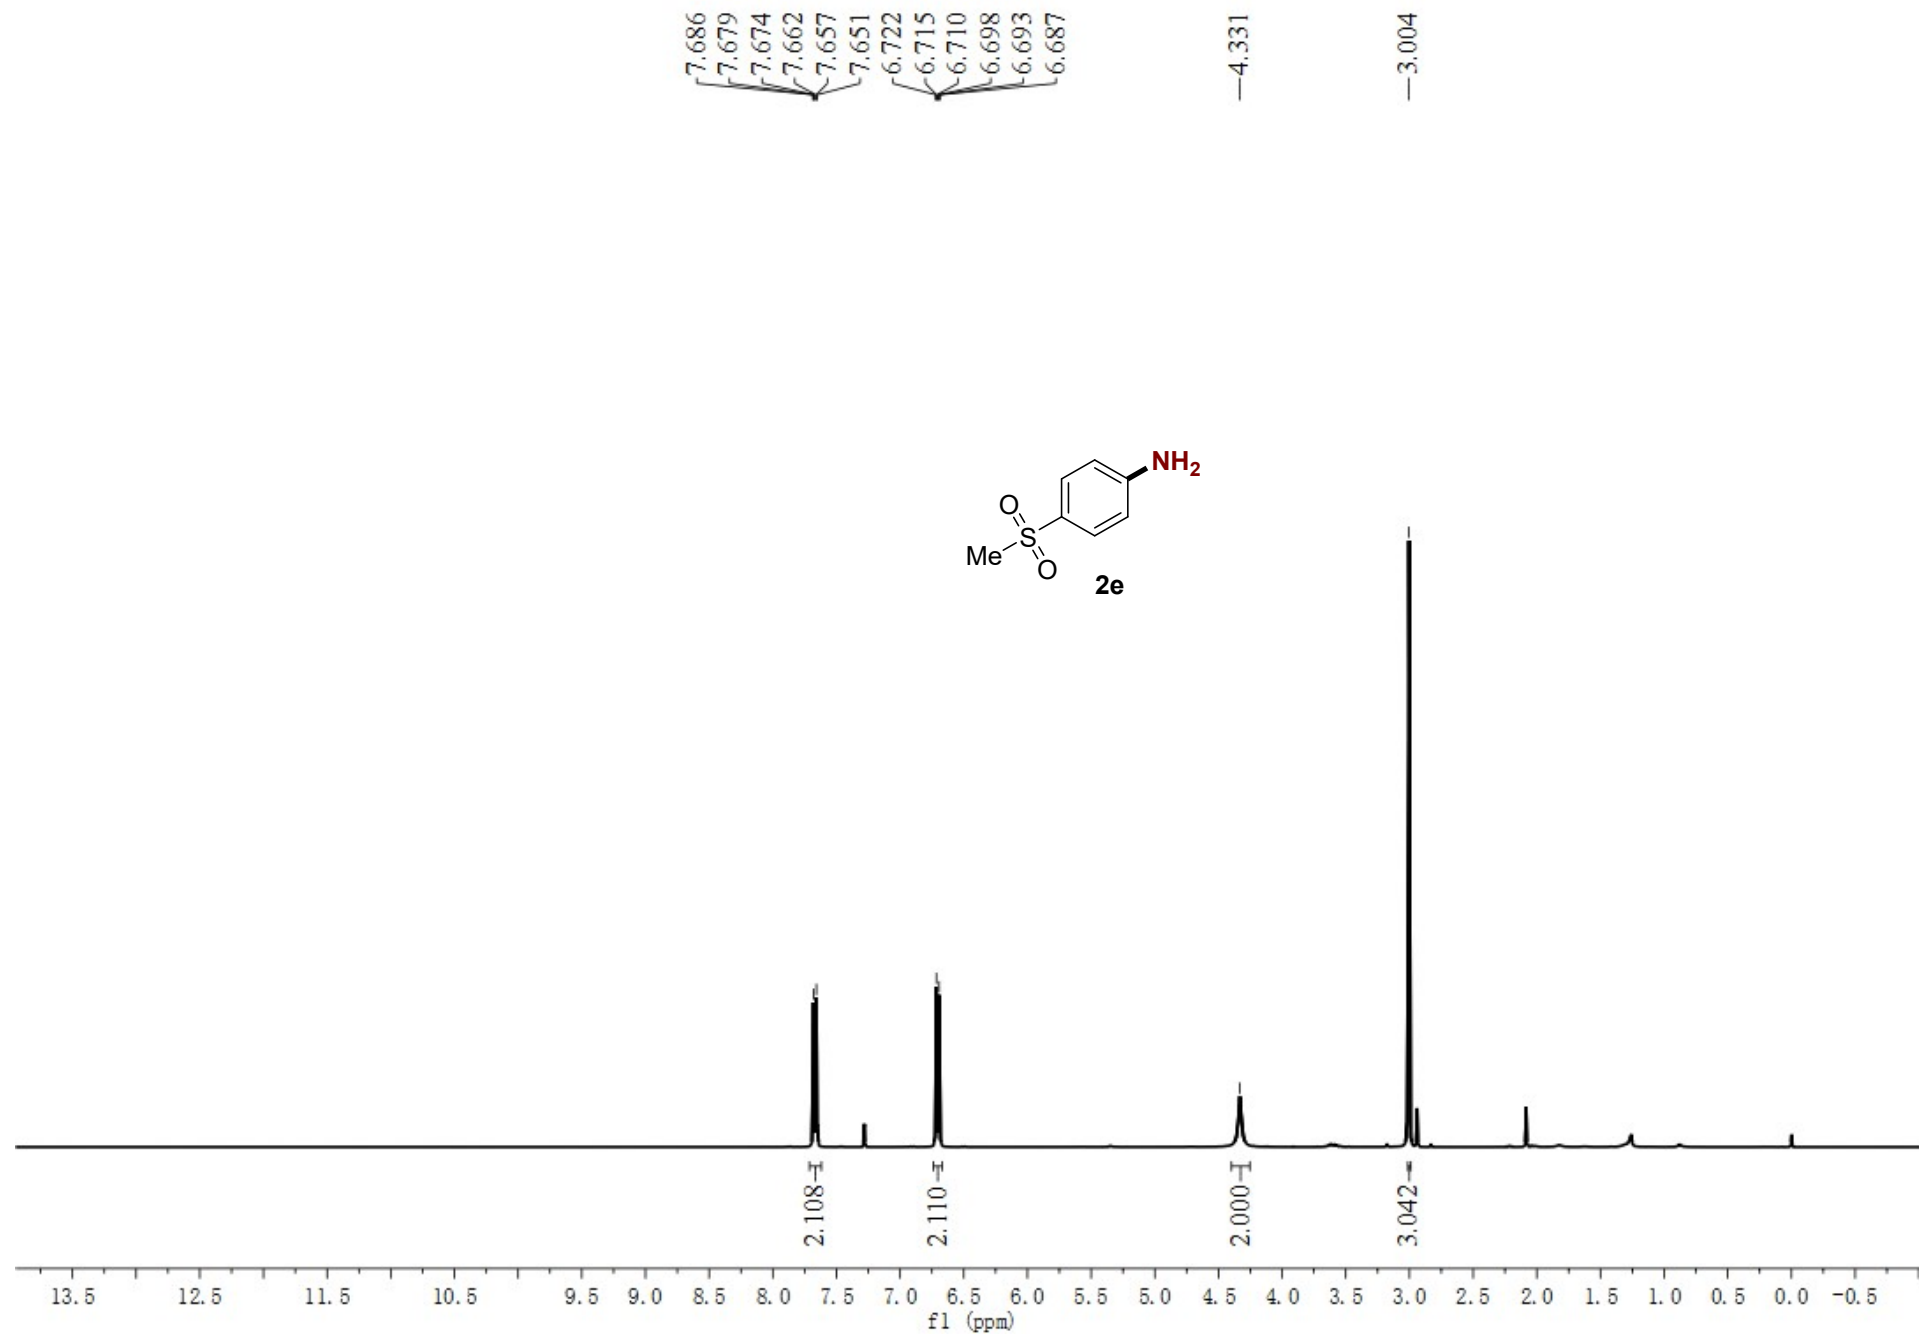

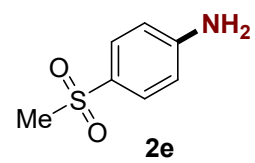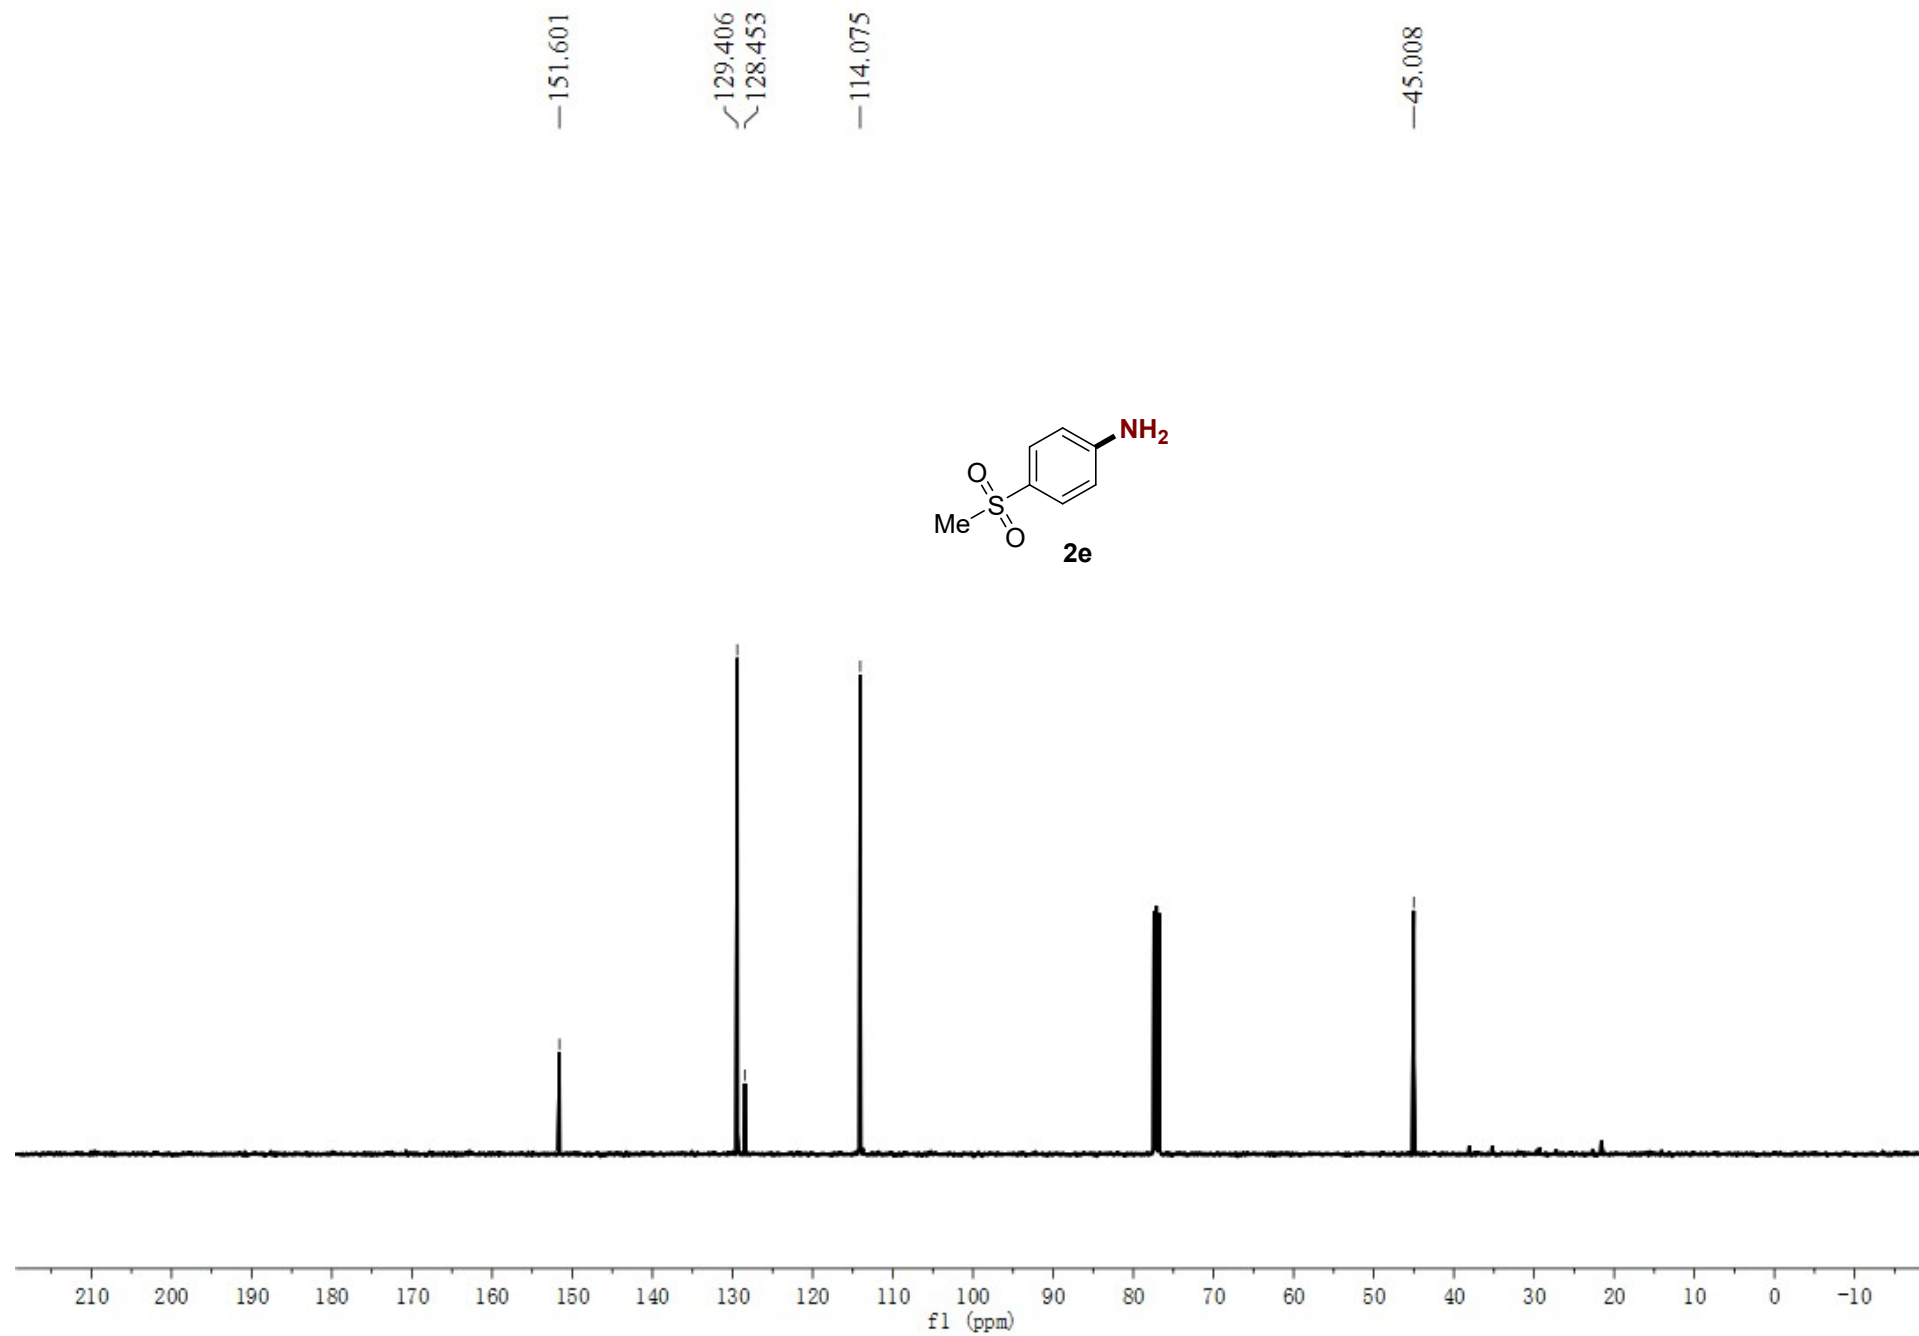

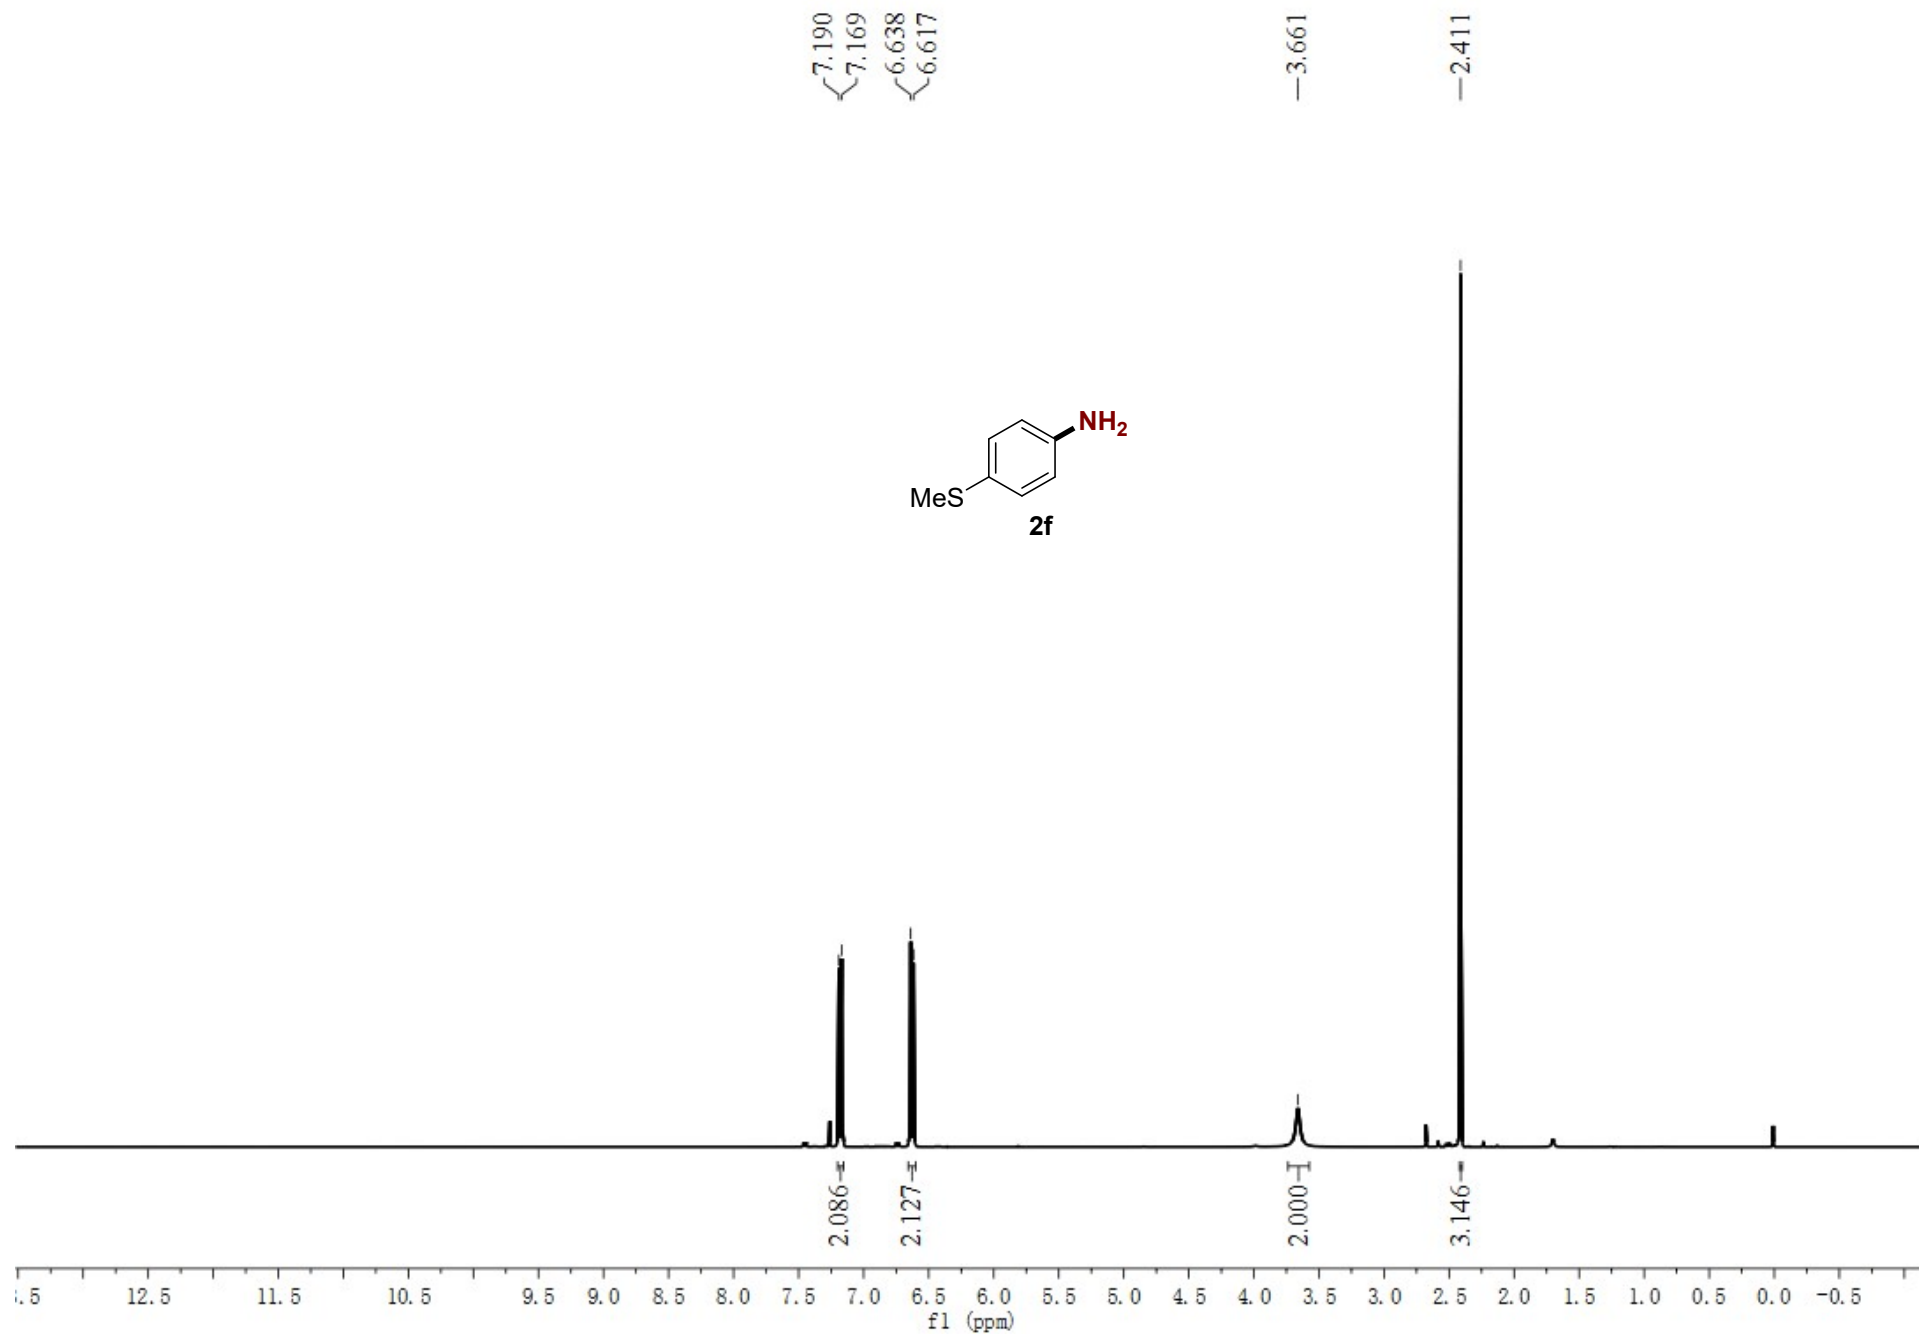

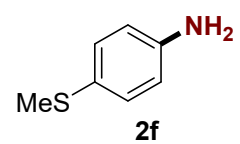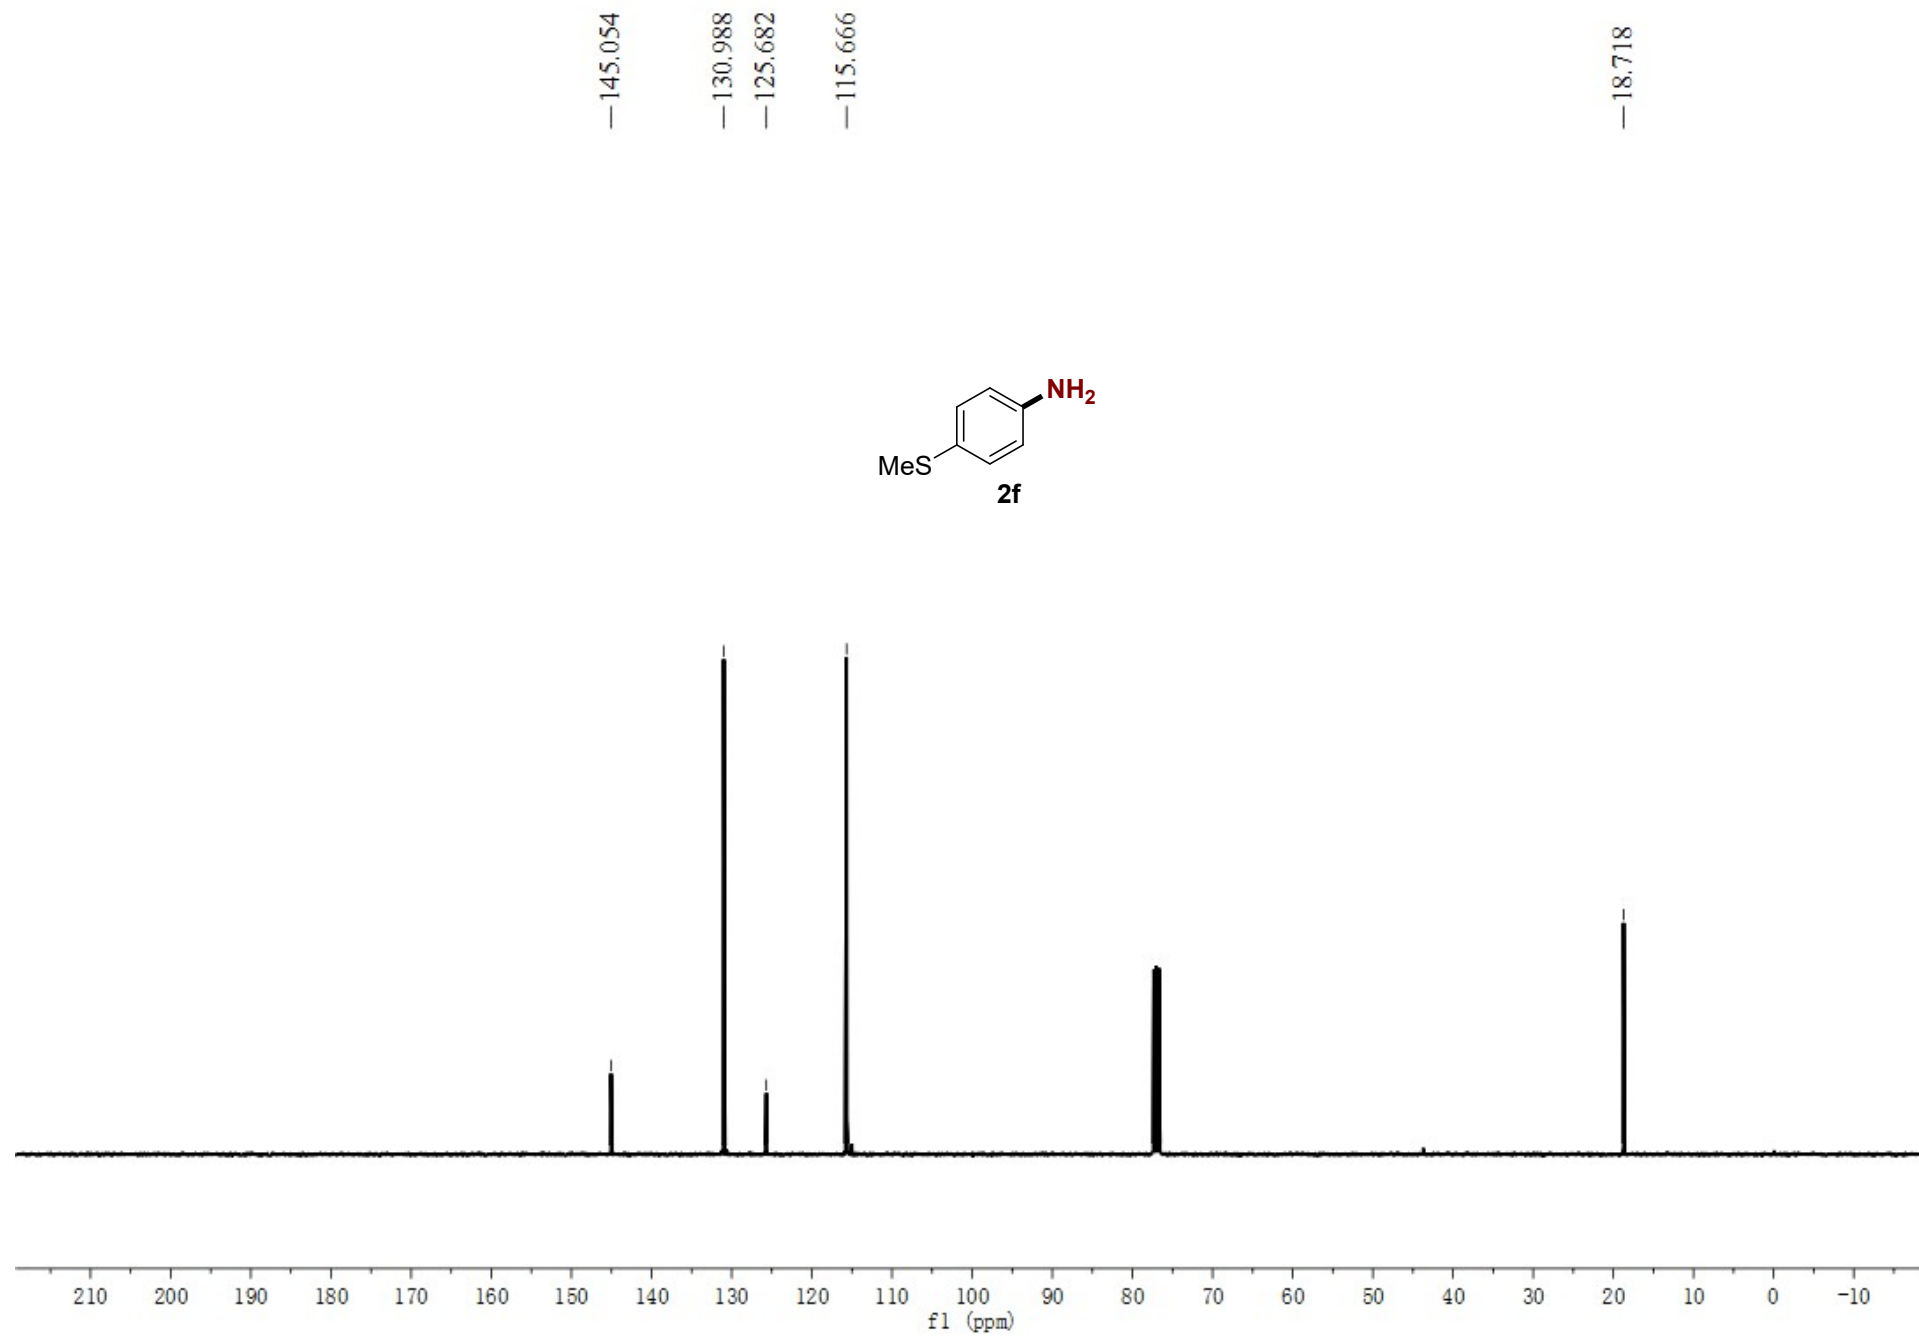

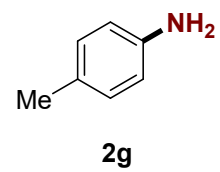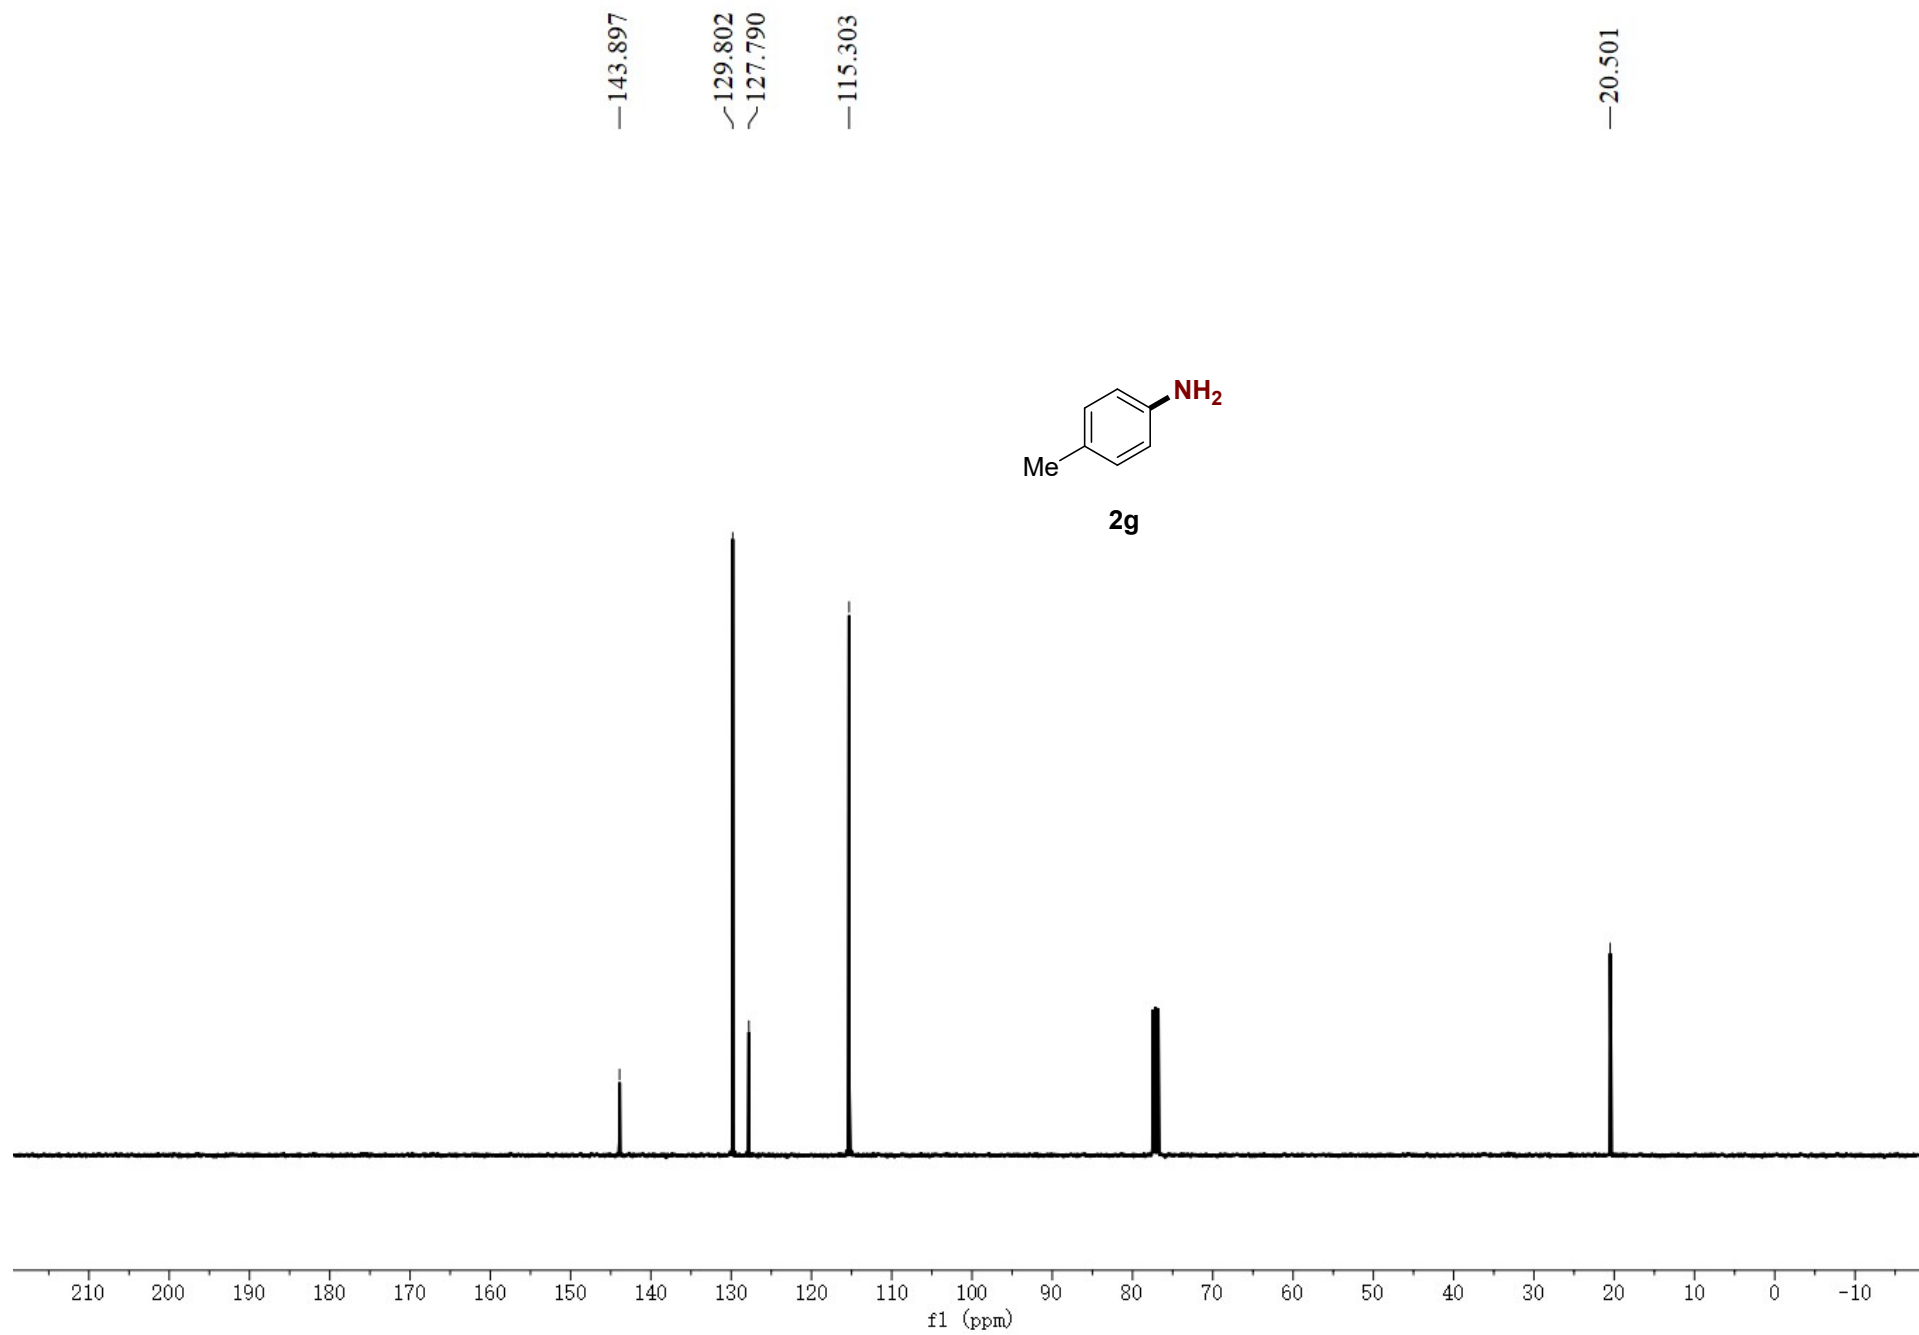

6.965  
6.945  
6.600  
6.579

3.490

2.229

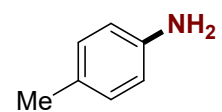

2g

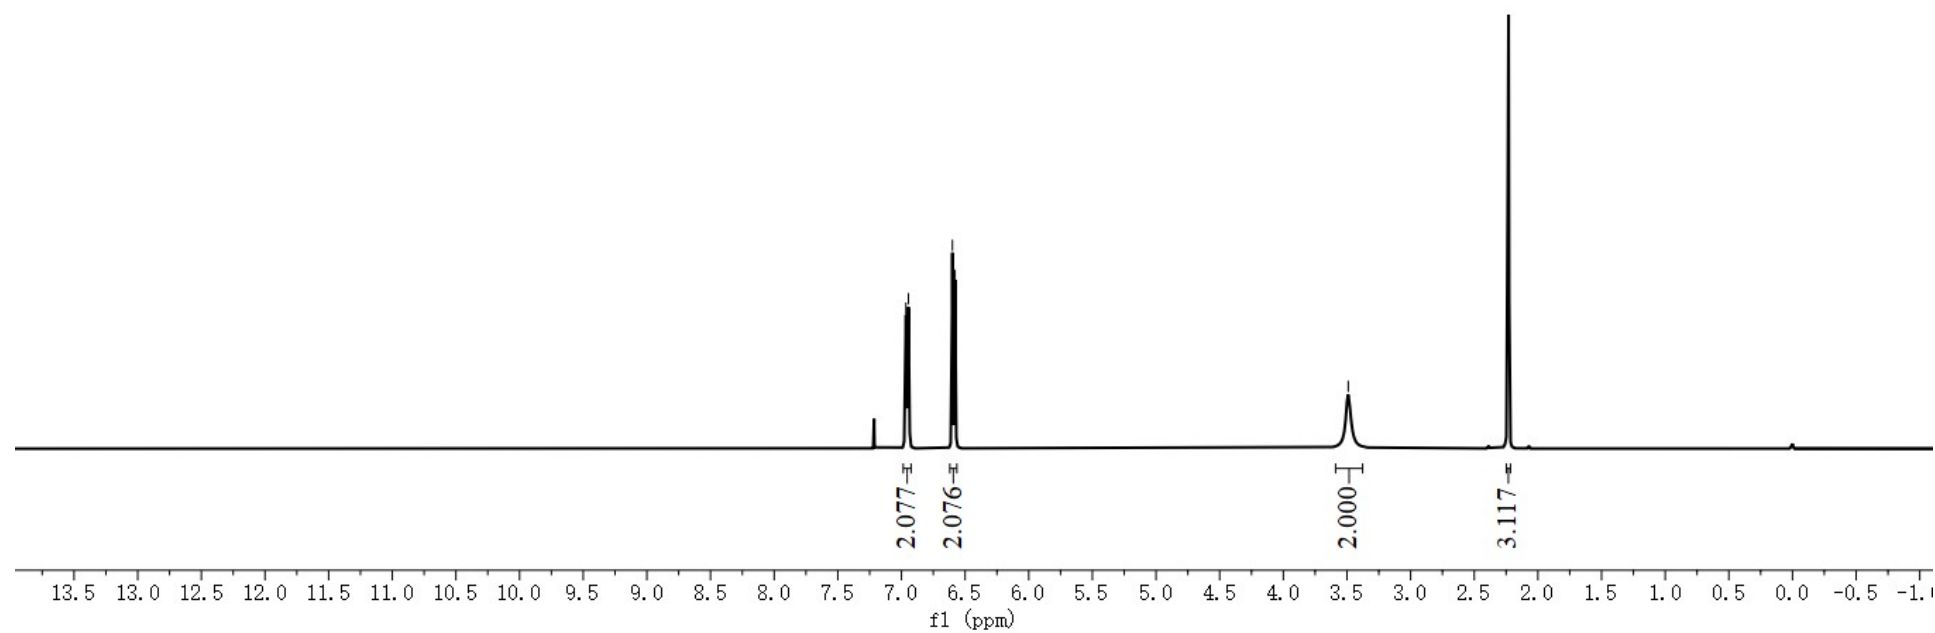

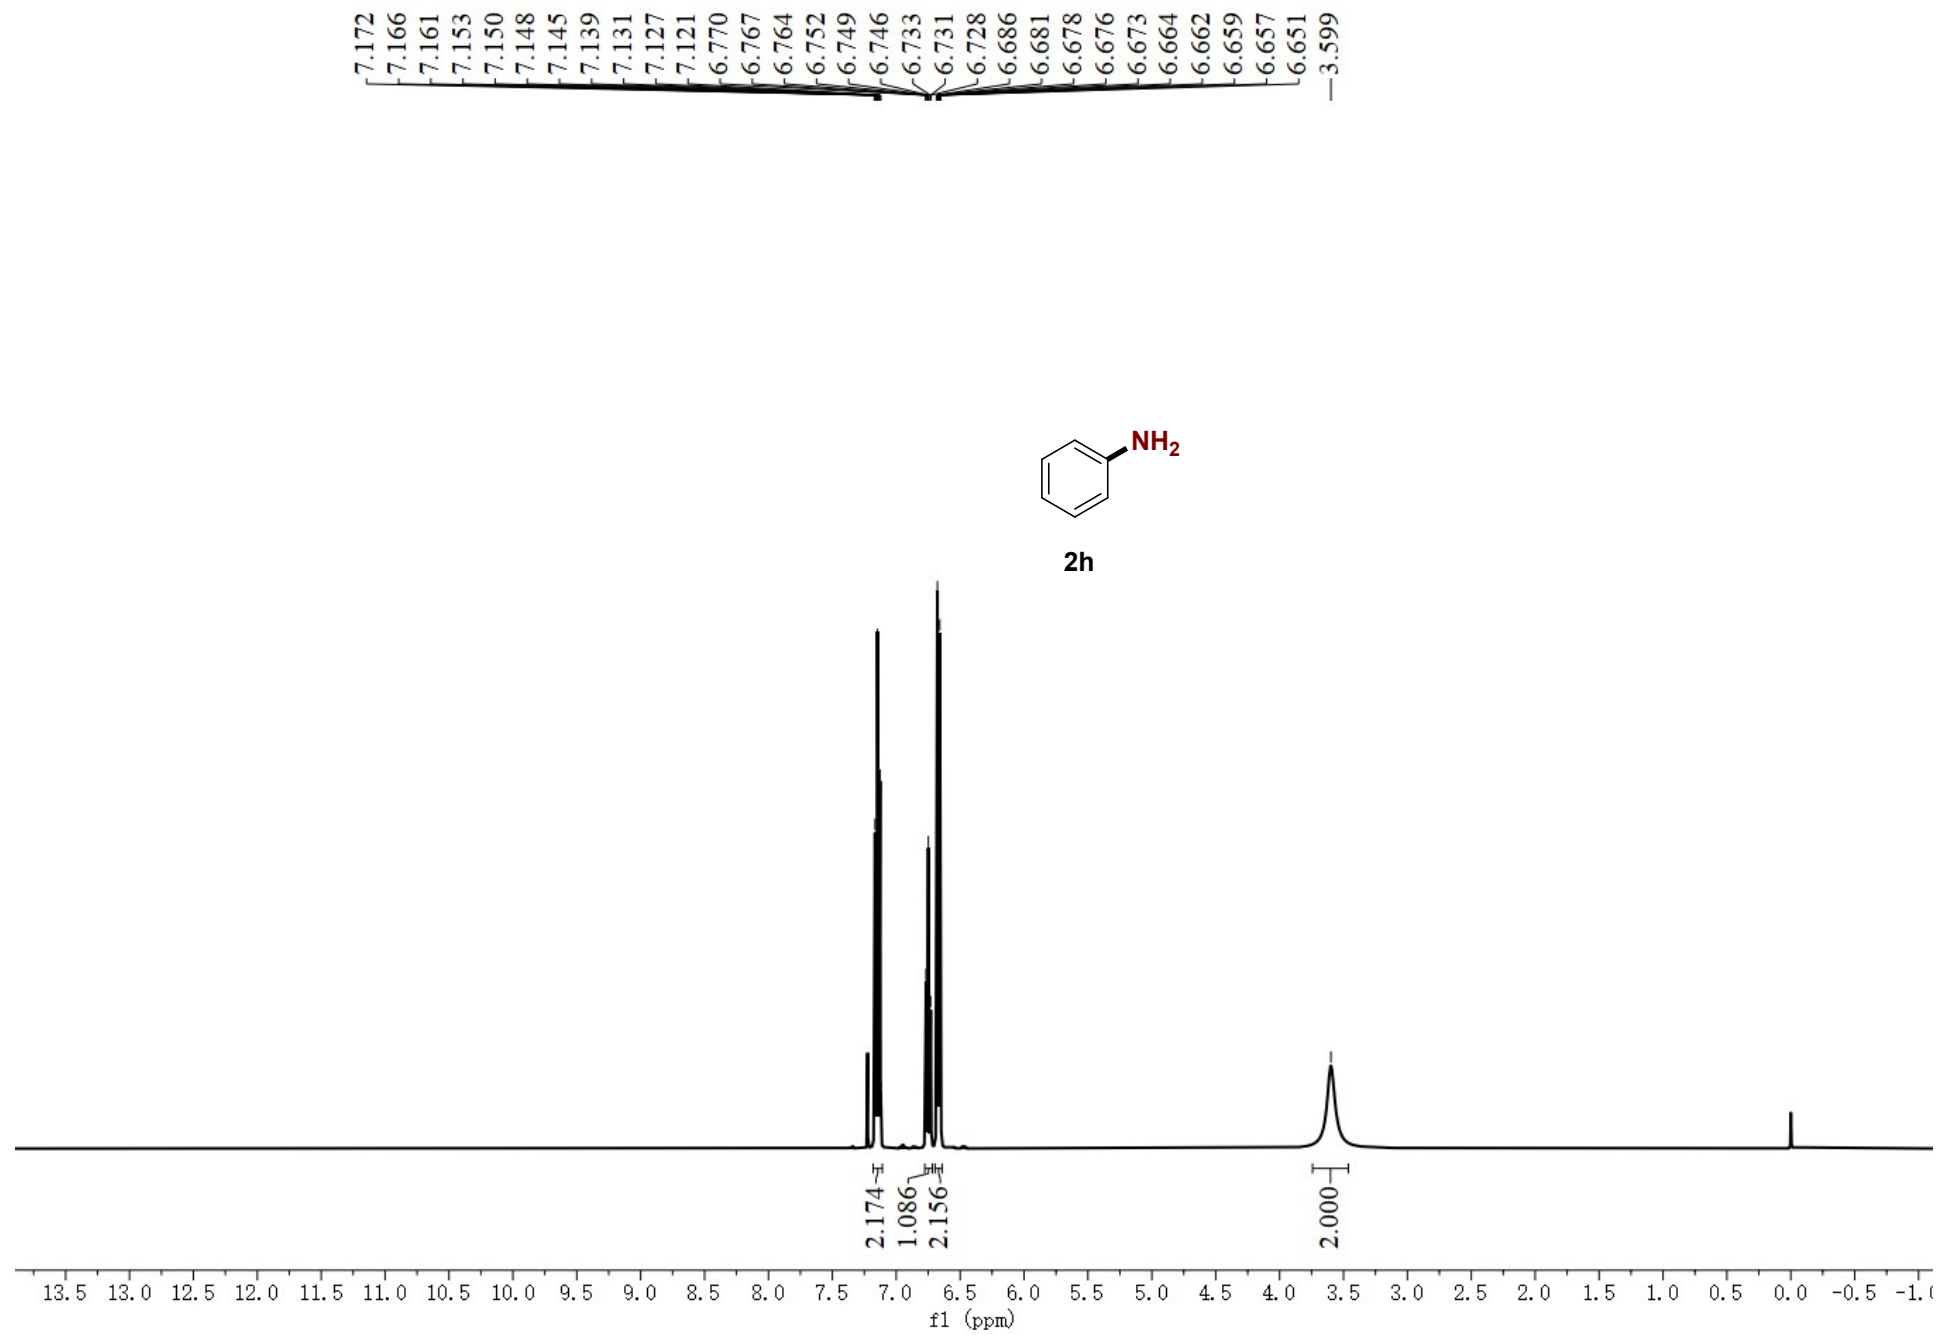

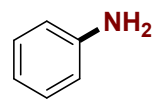

2h

—146.426

—129.333

—118.581

—115.140

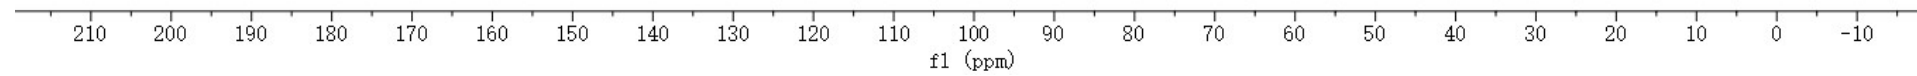

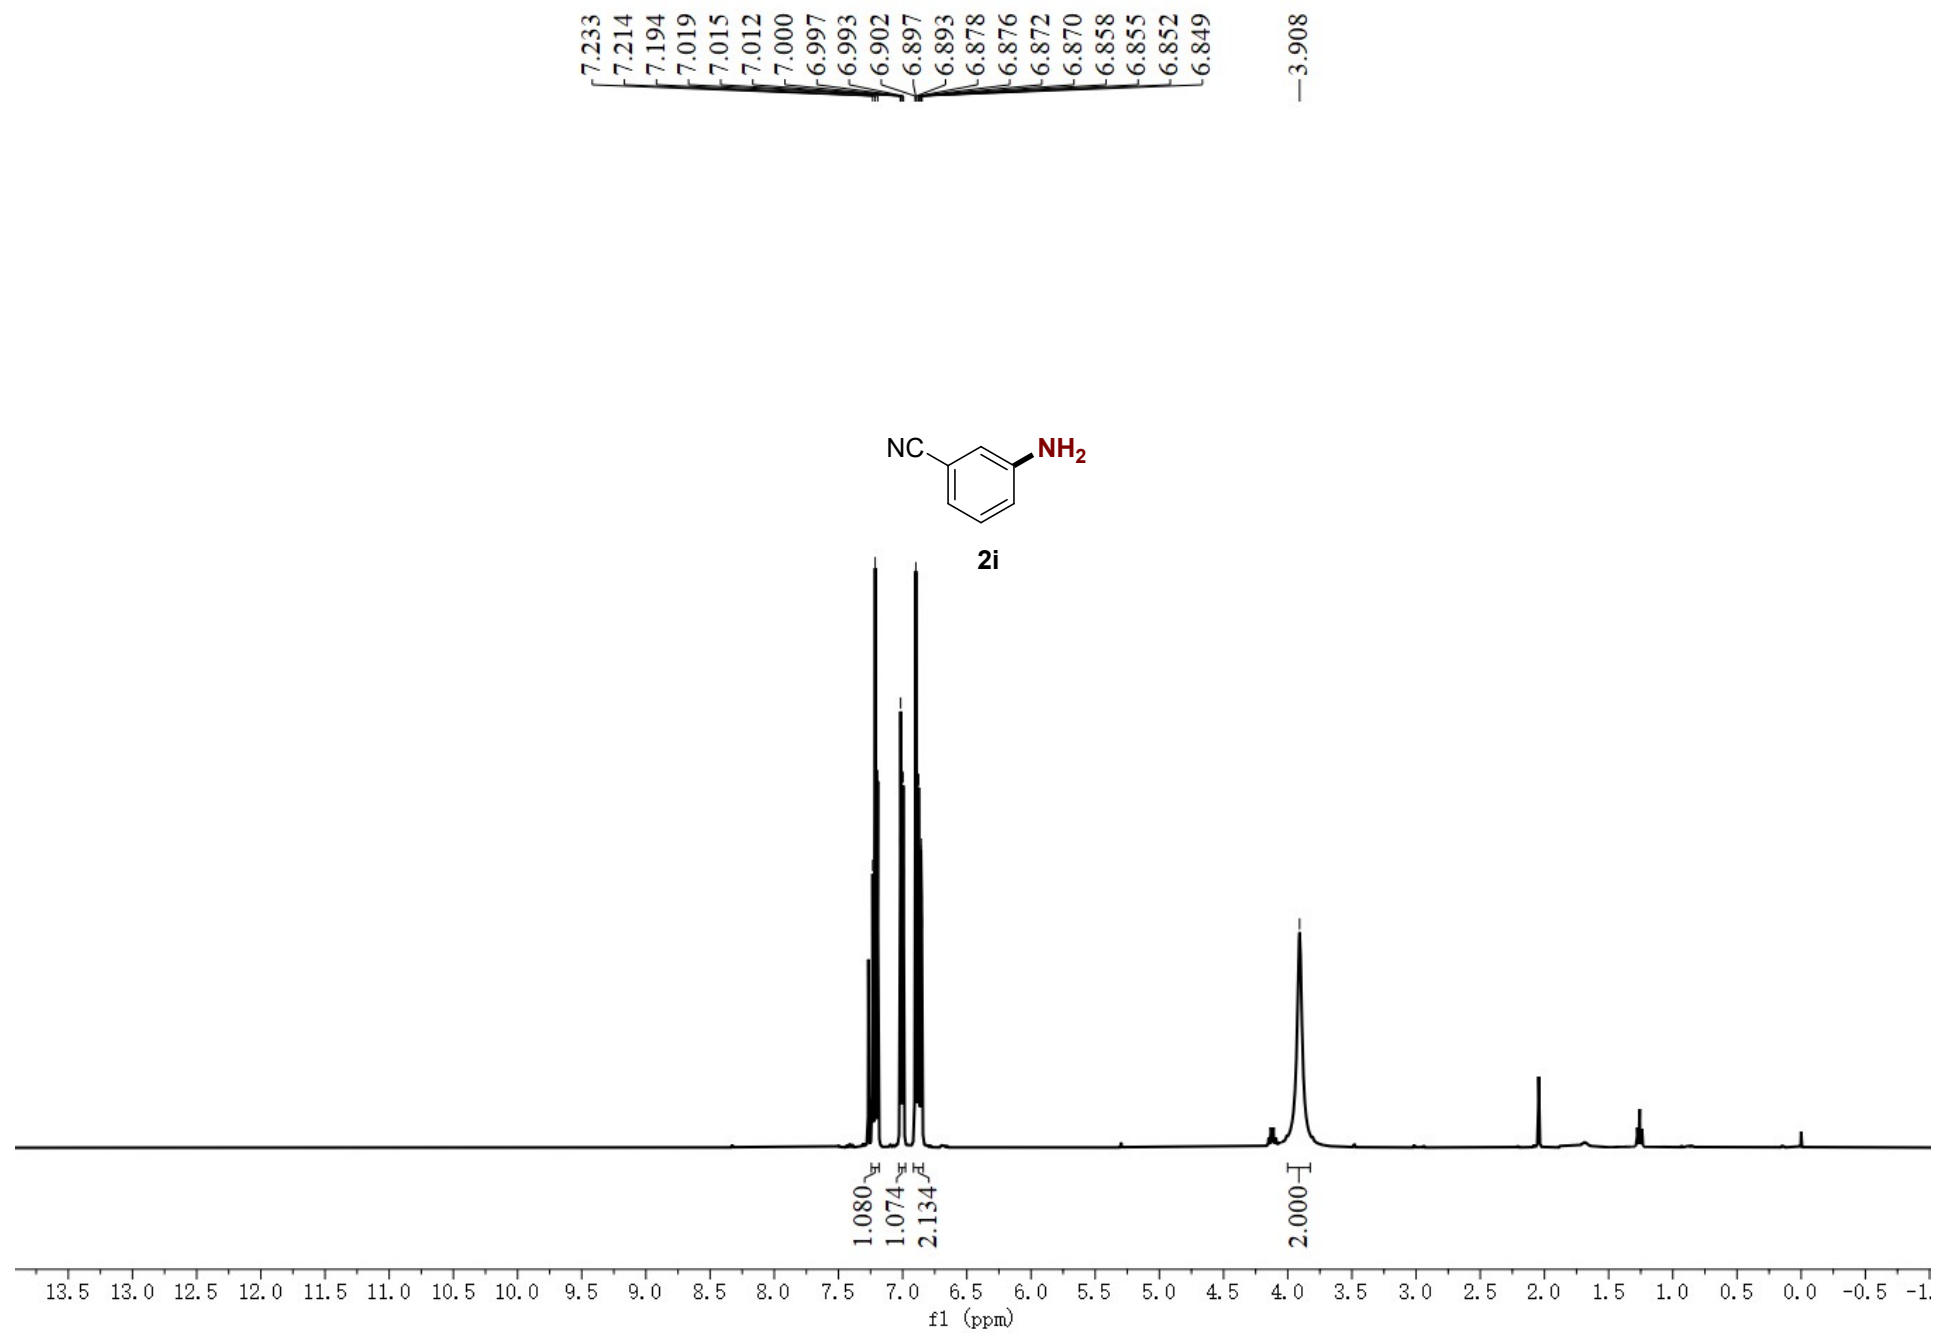

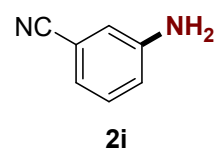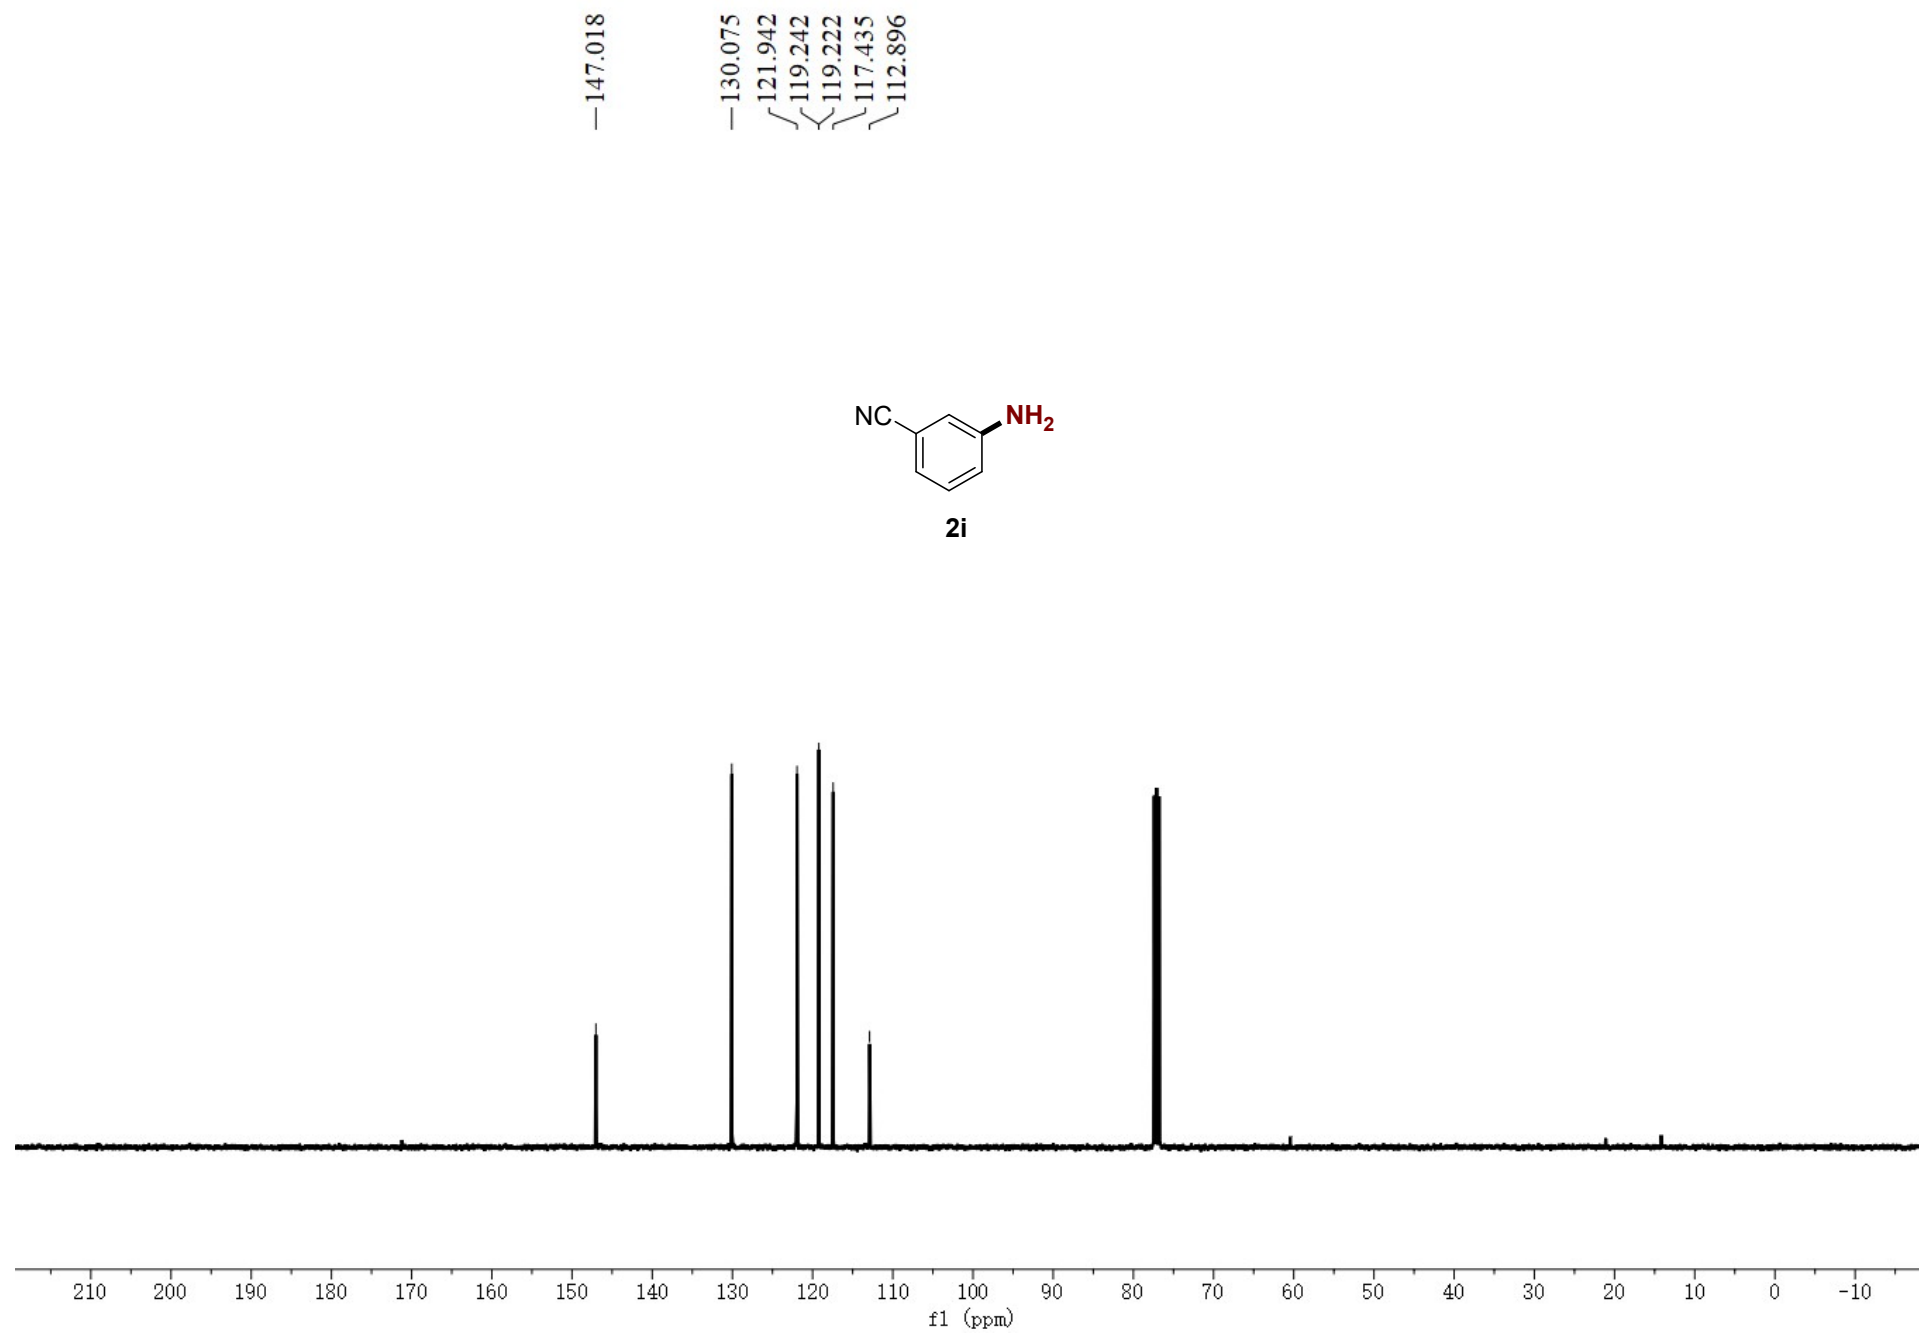

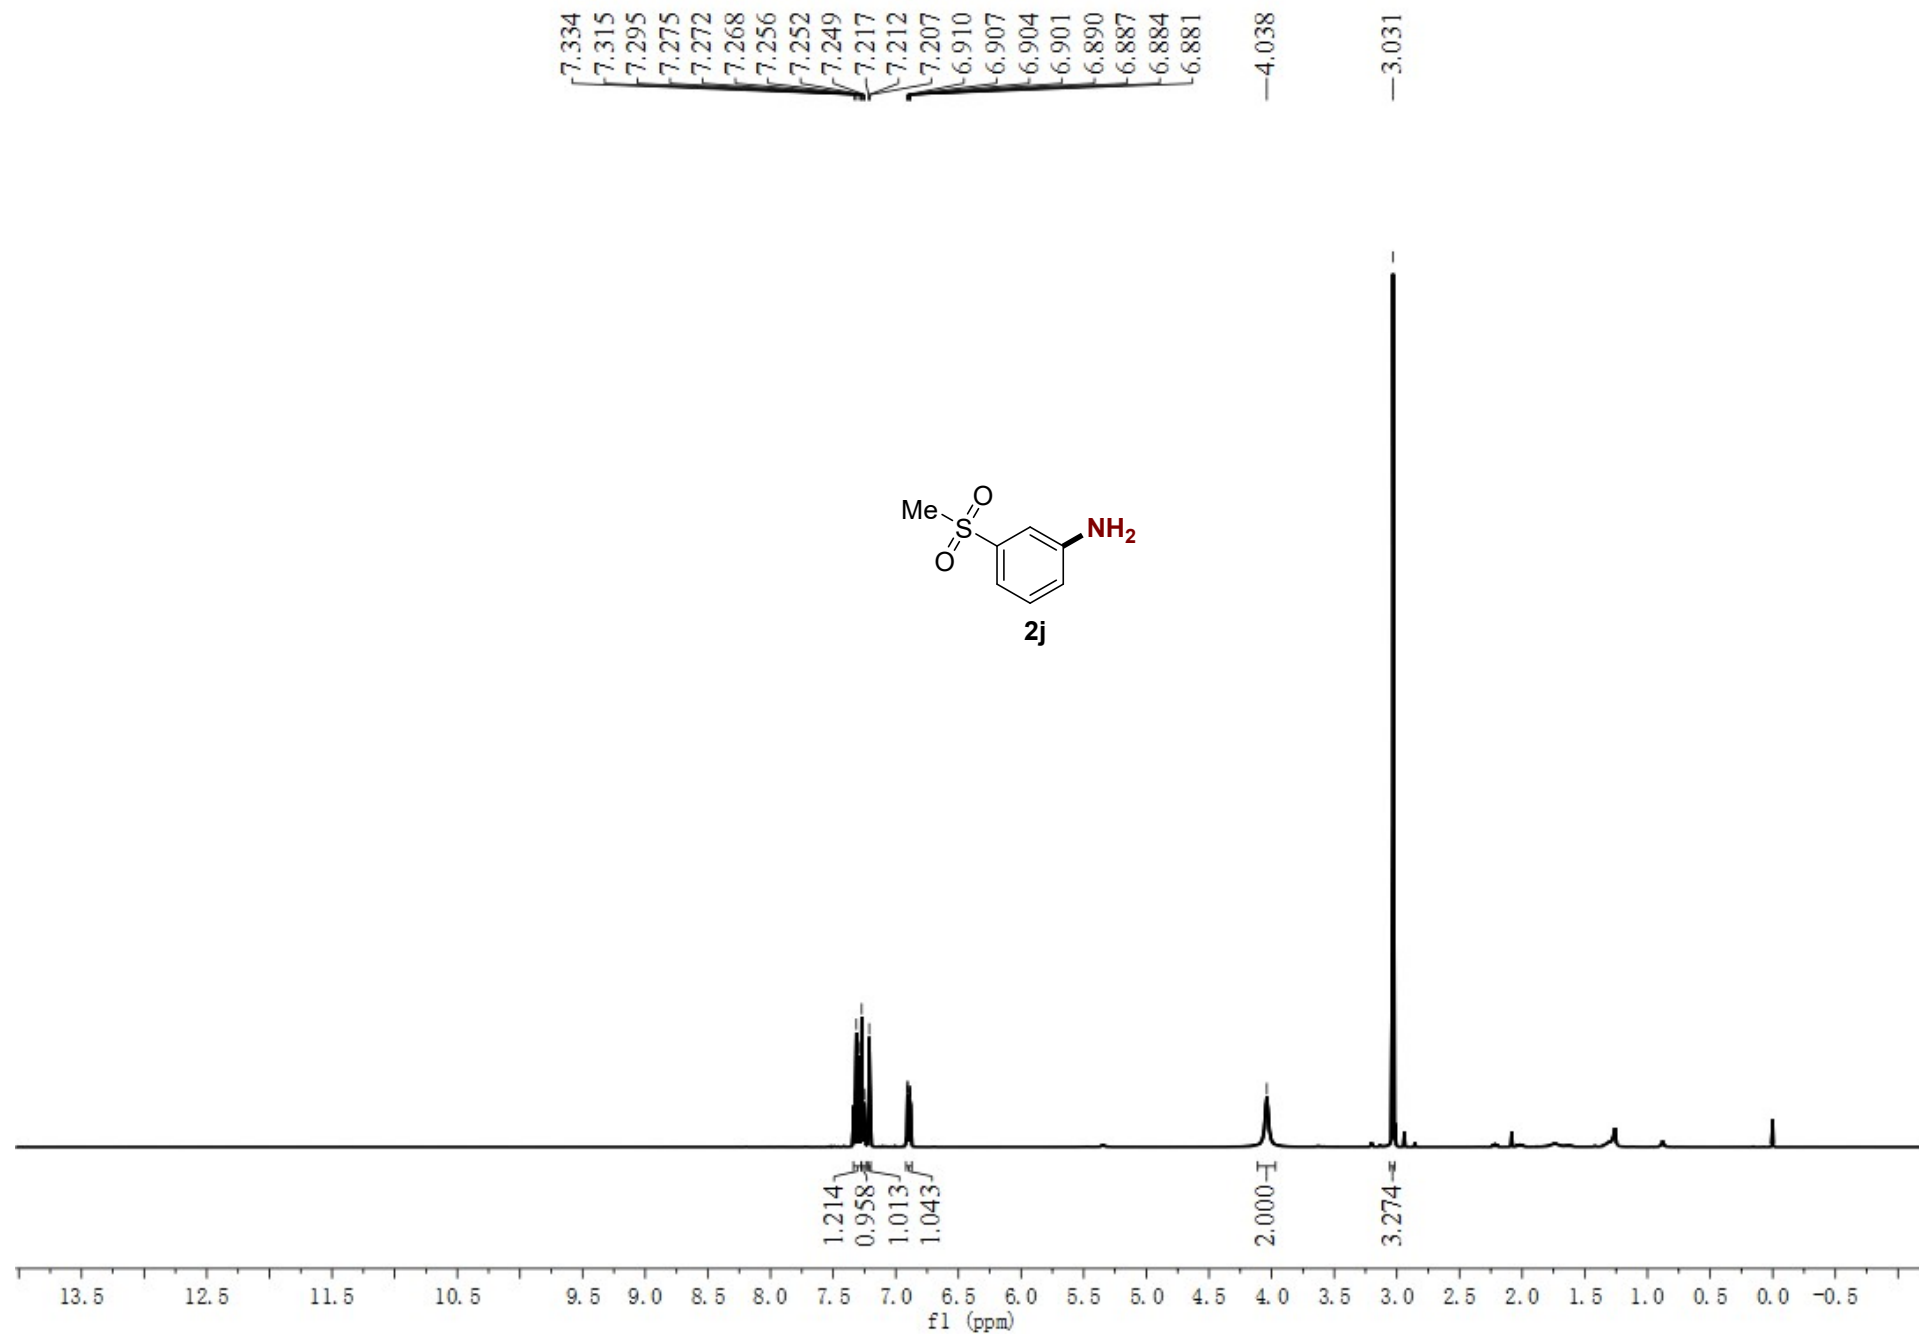

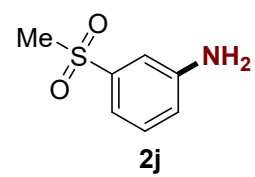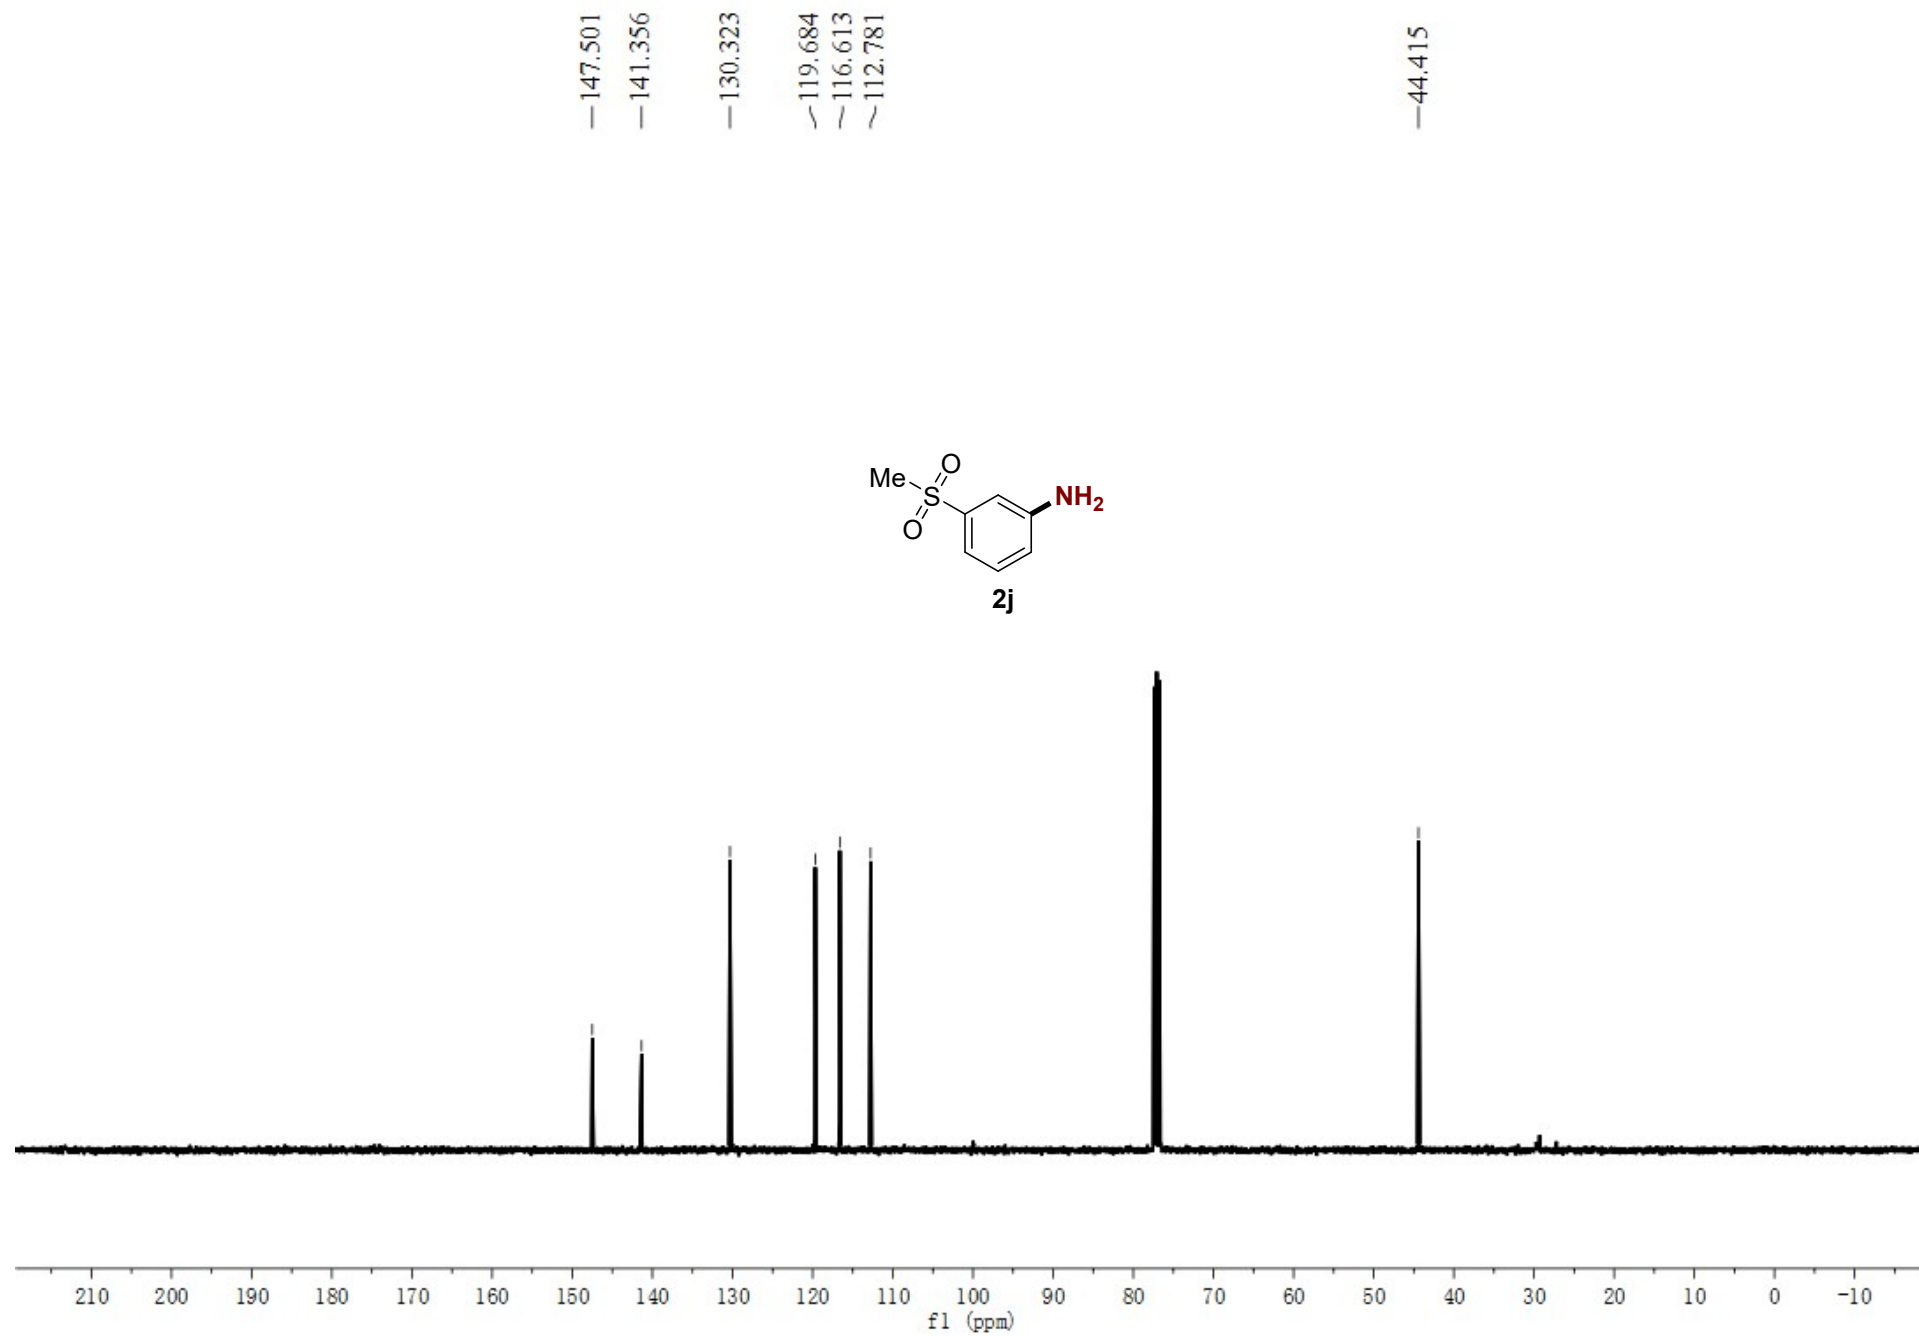

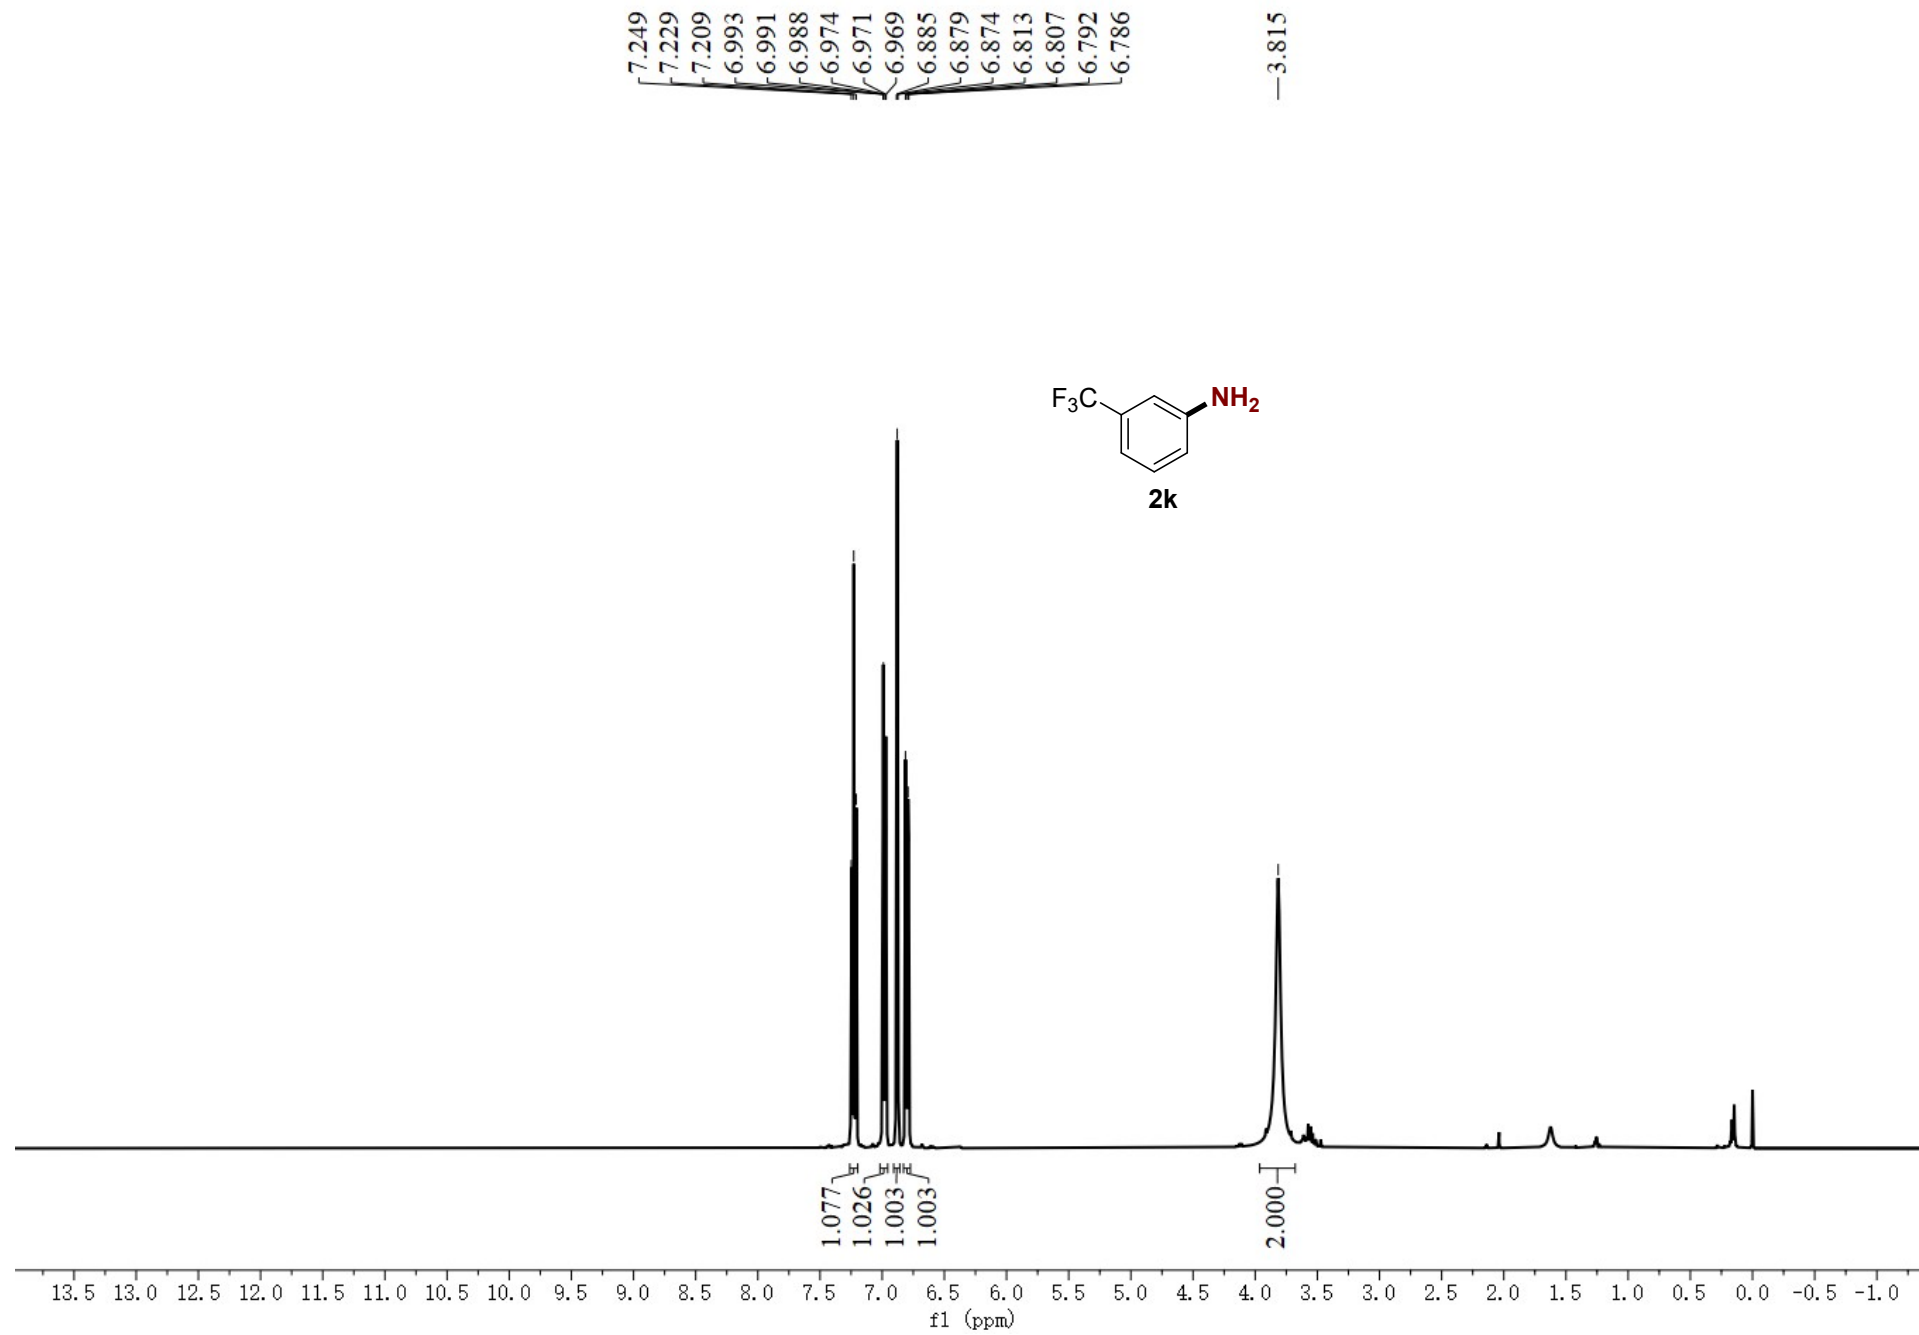

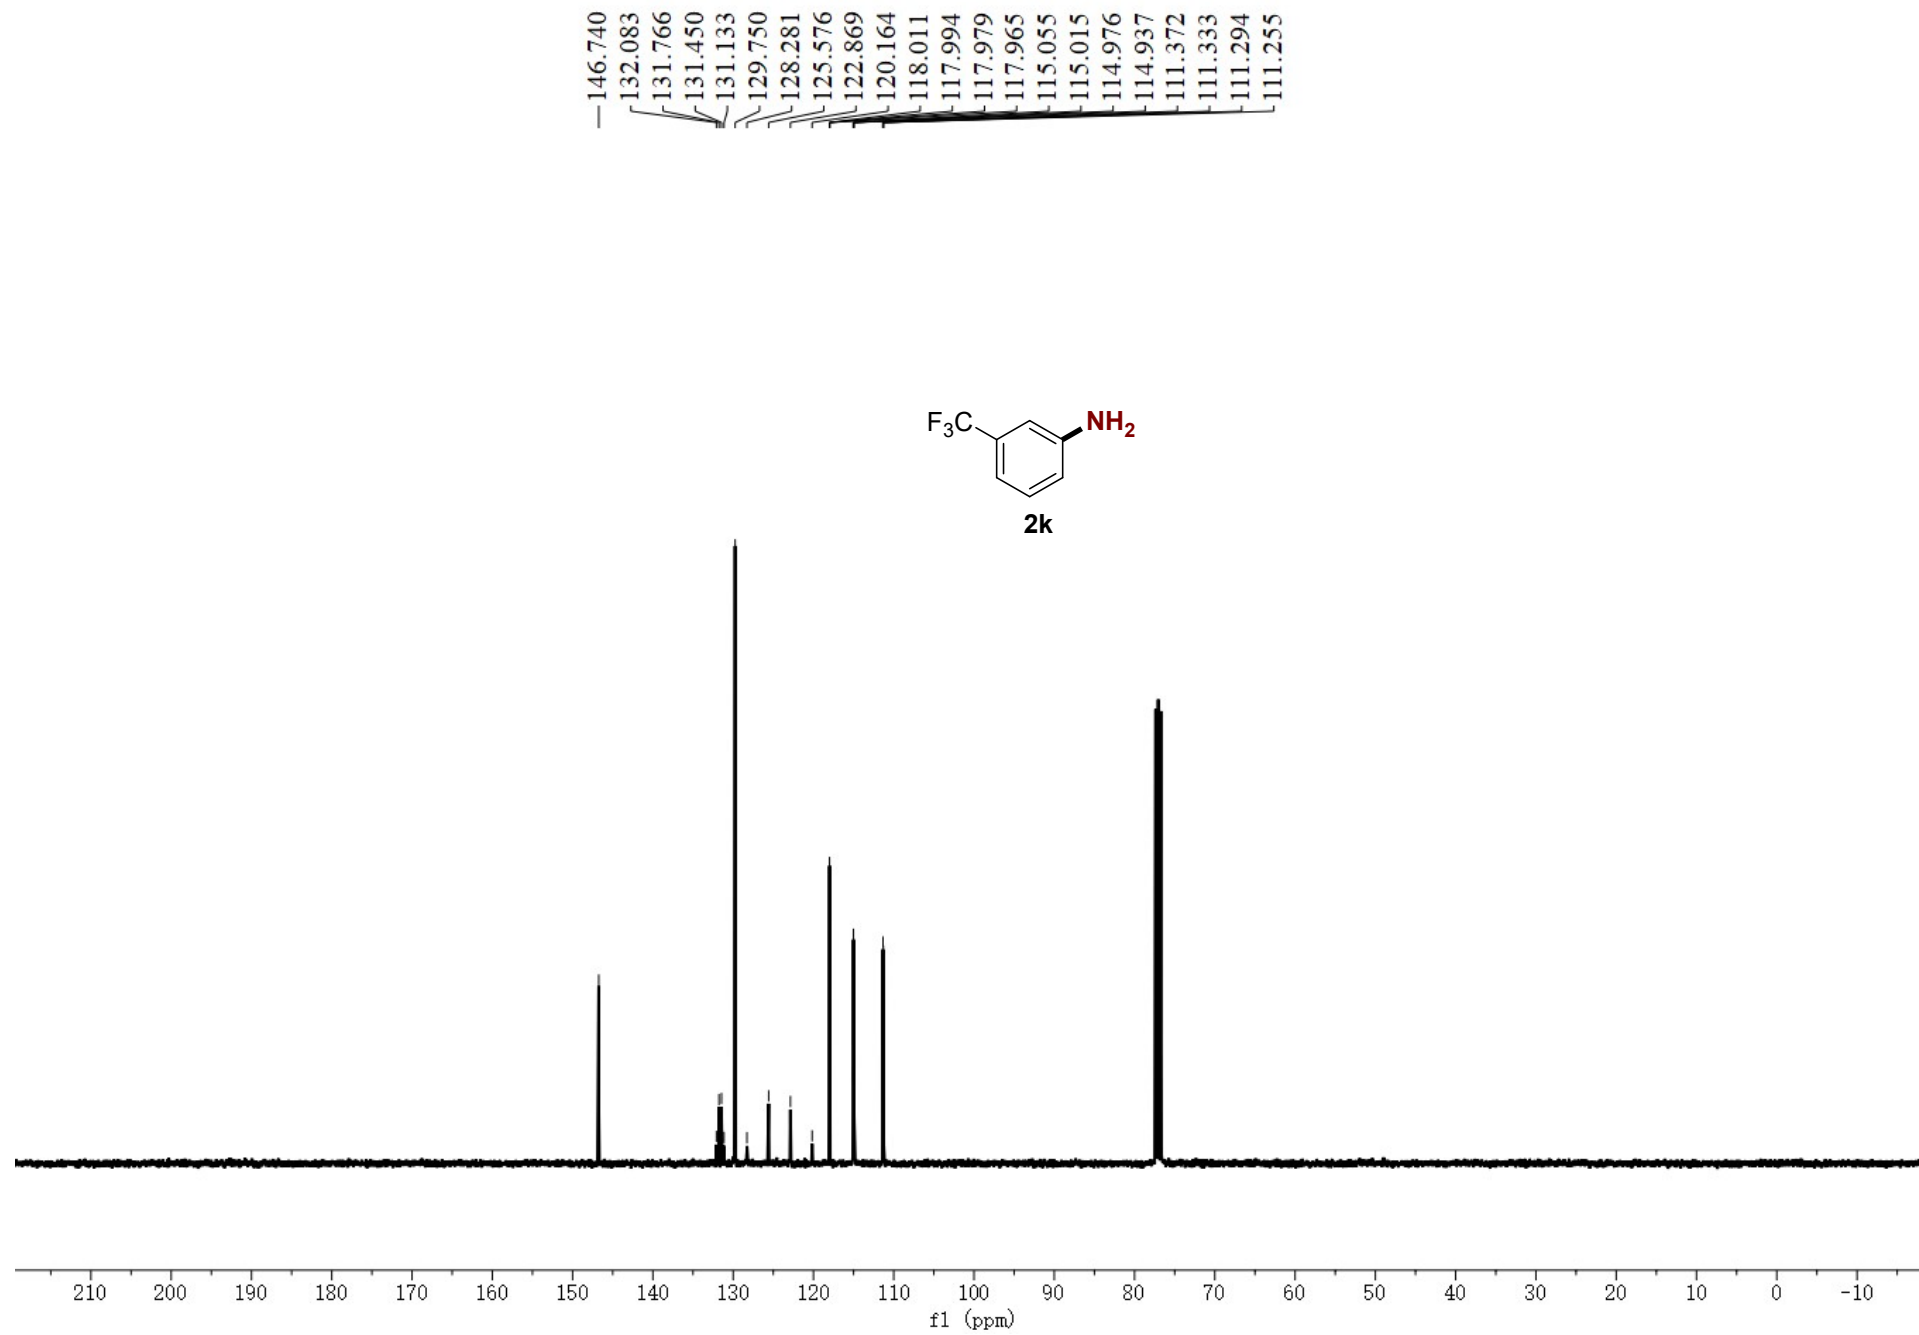

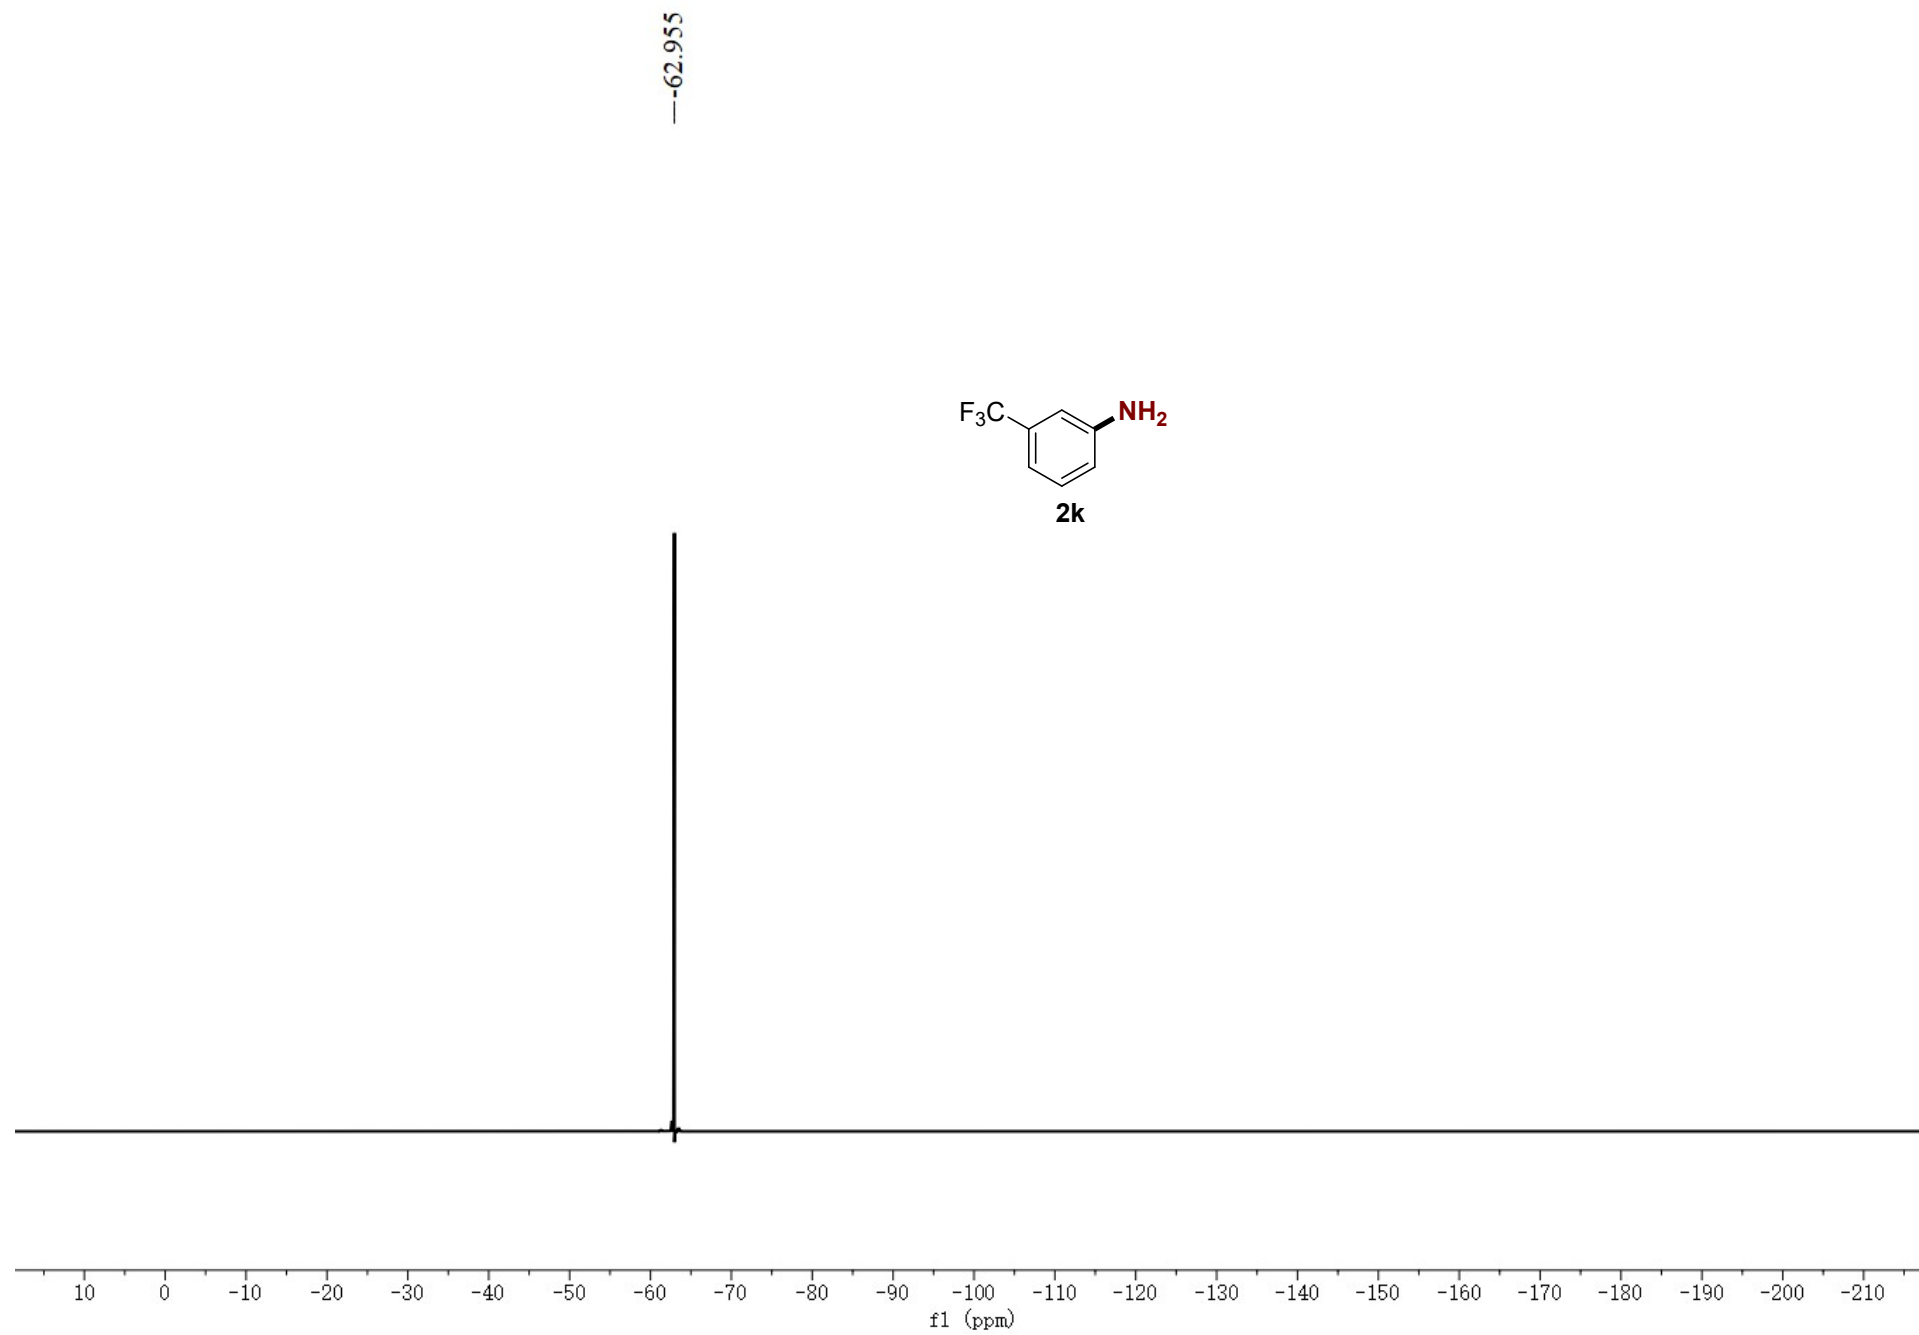

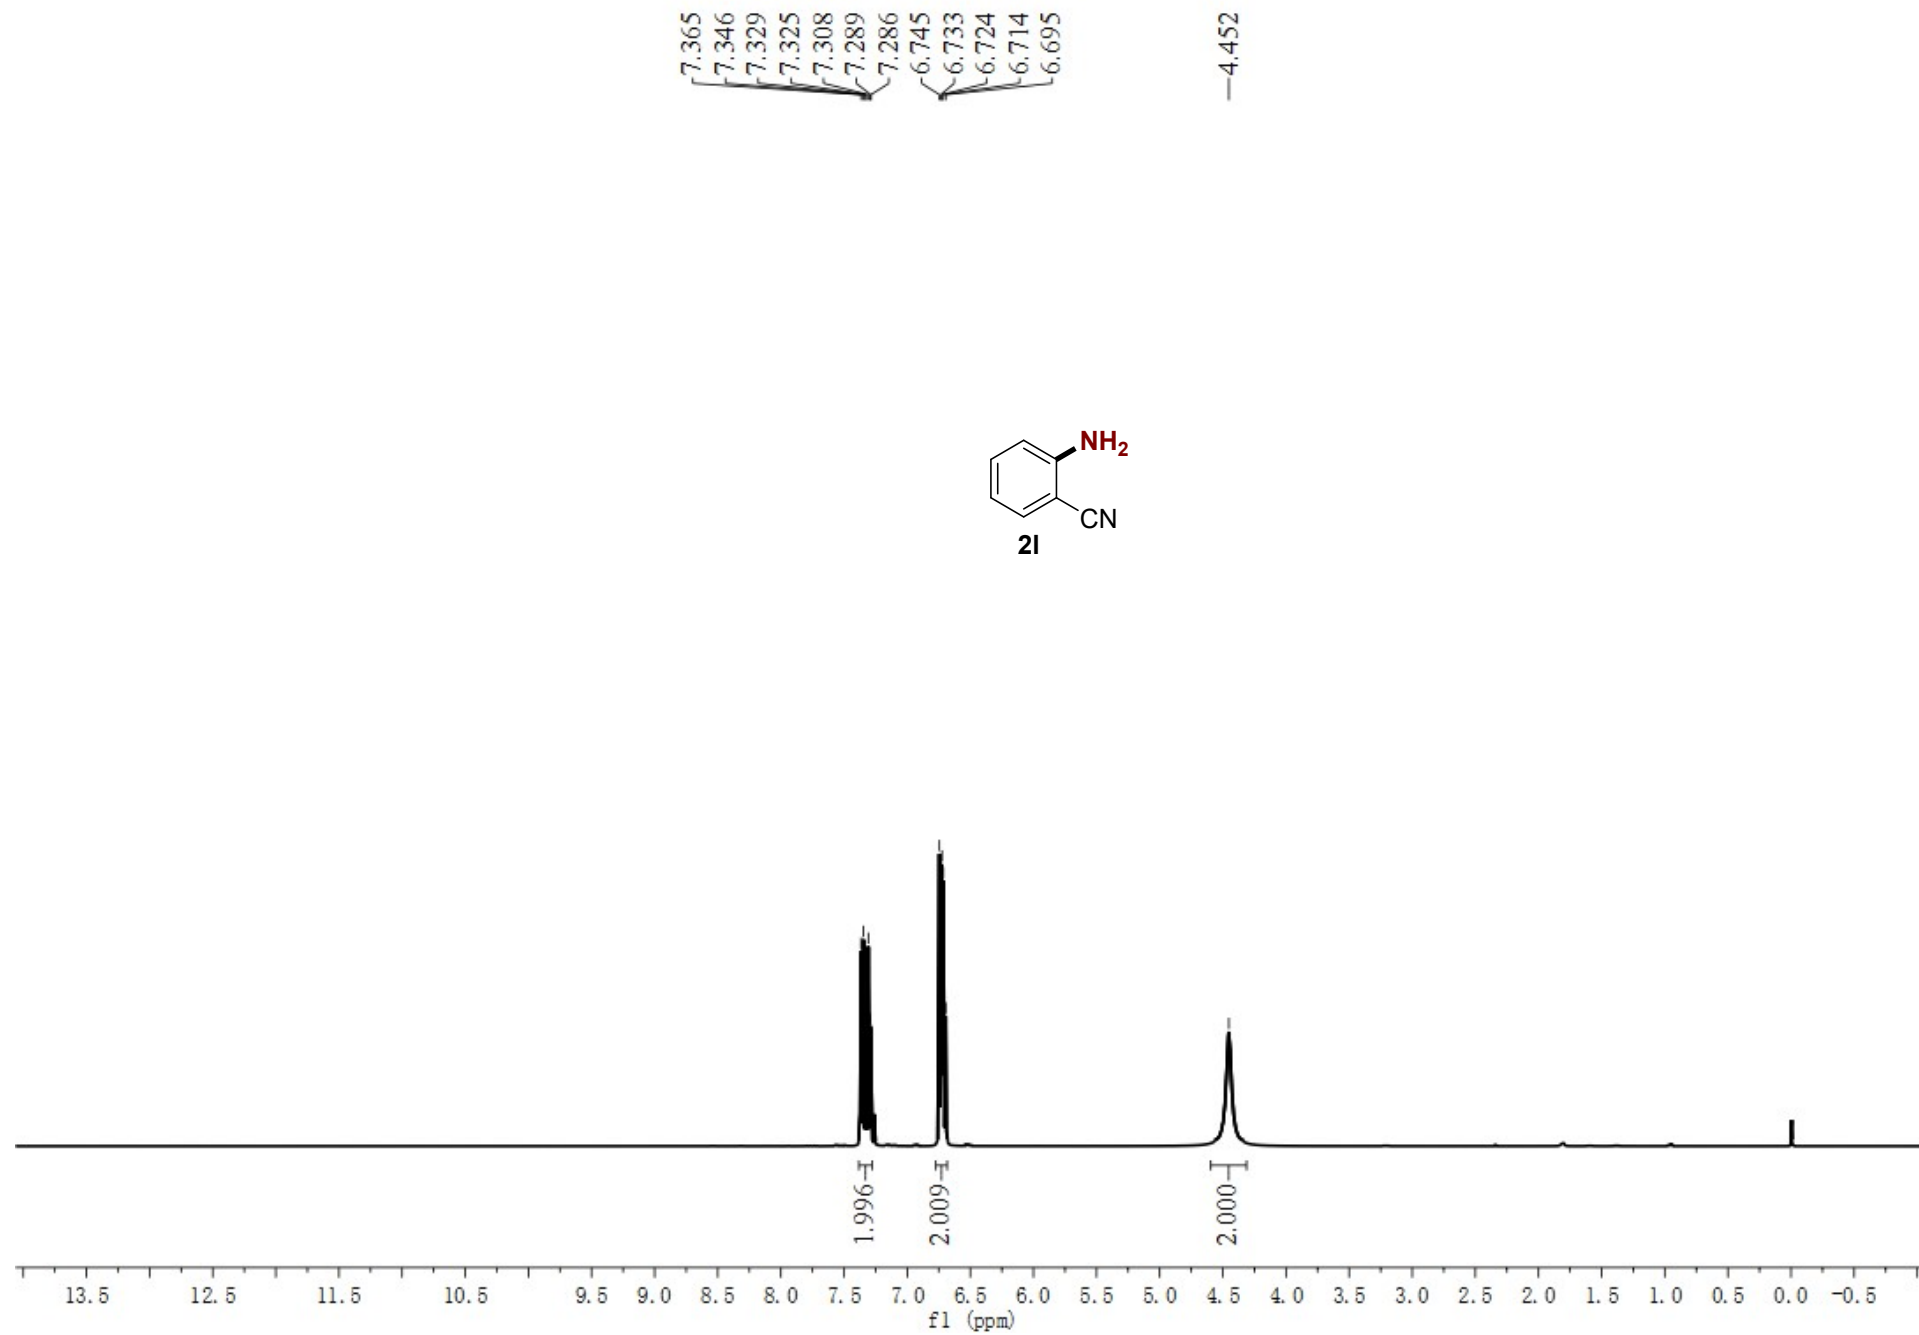

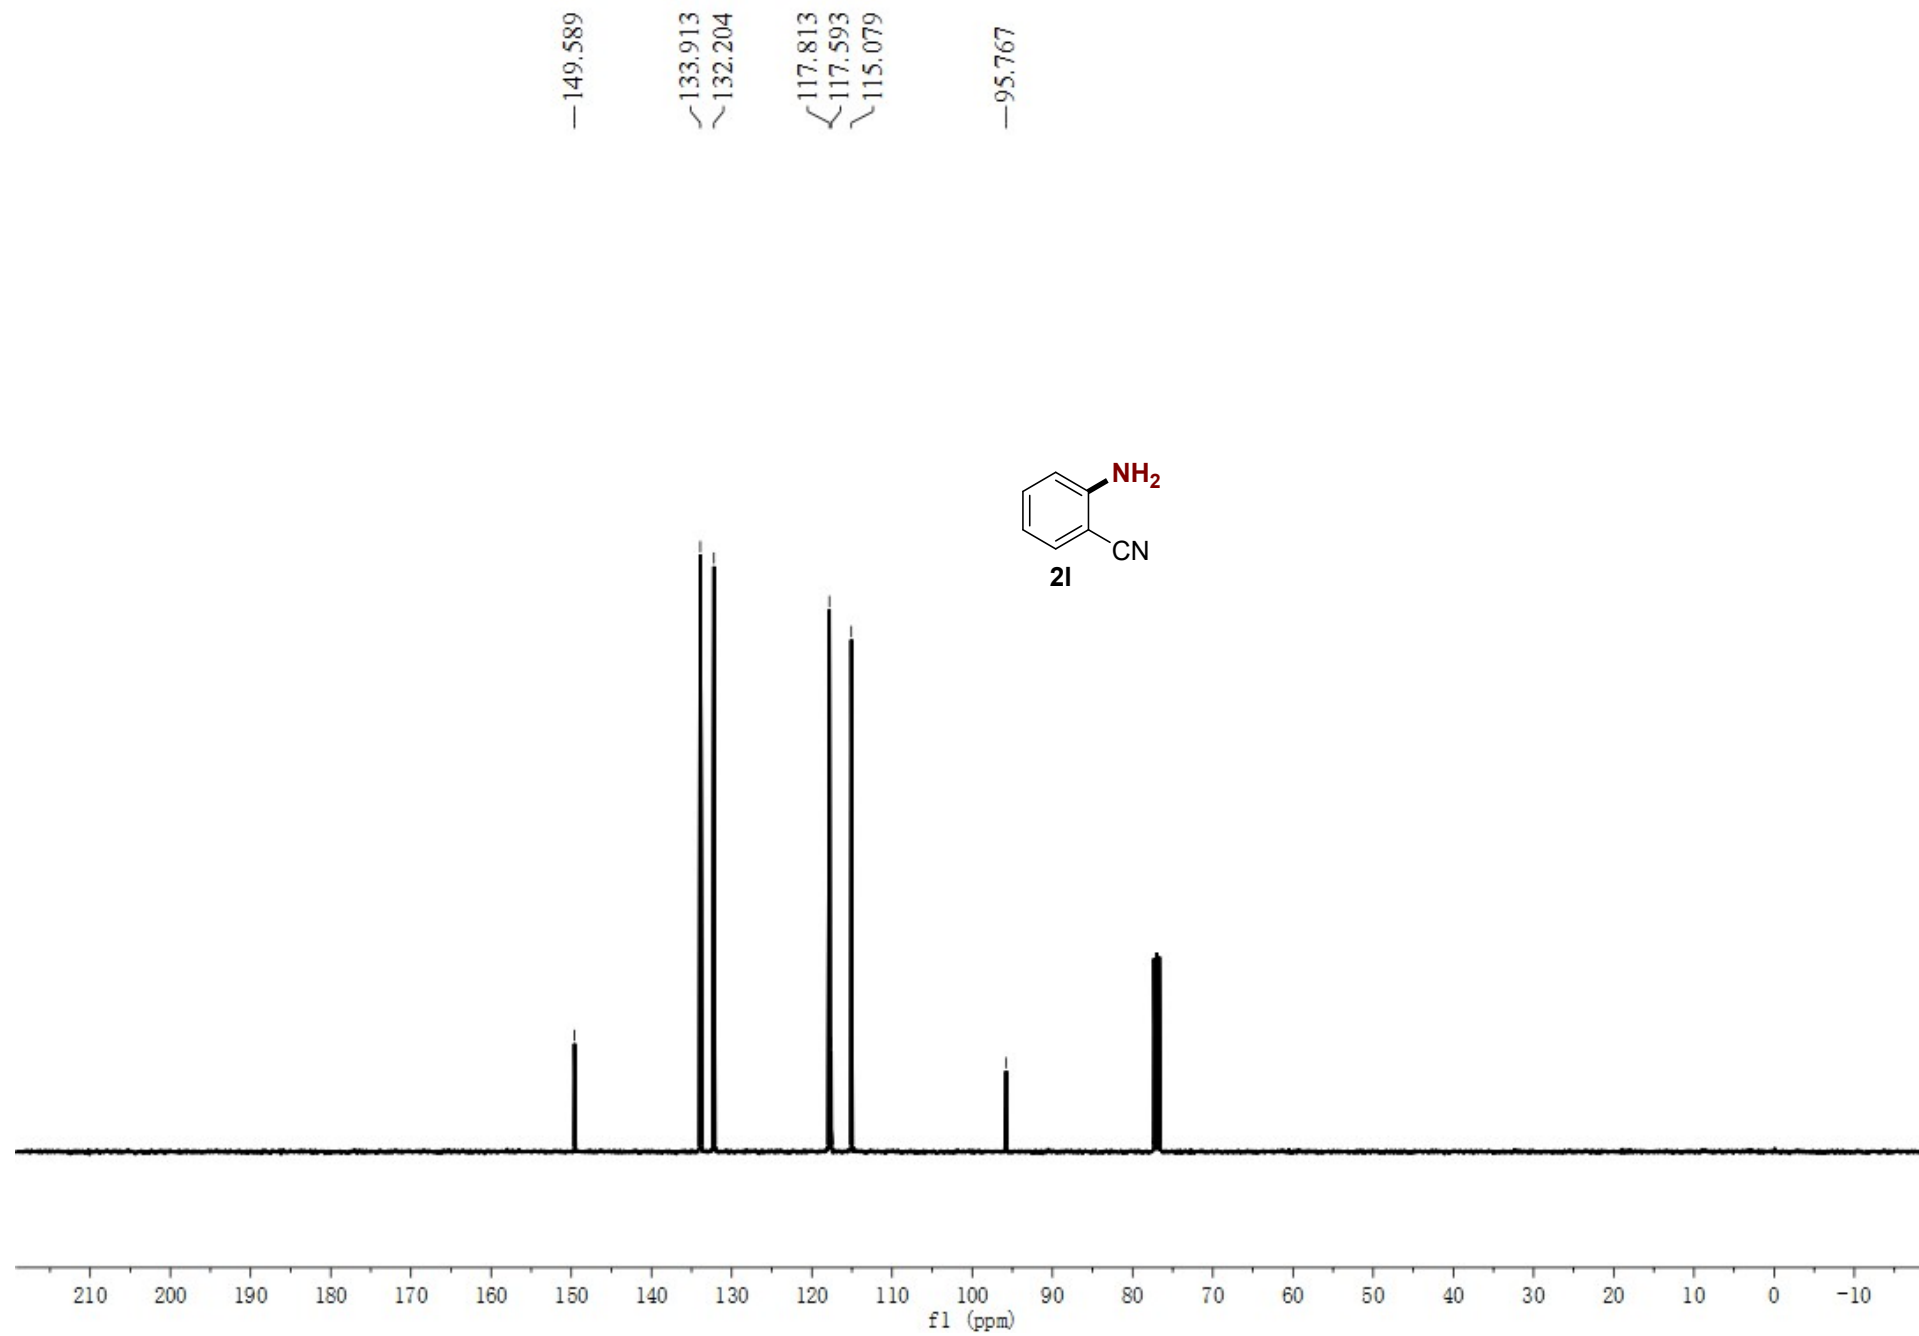

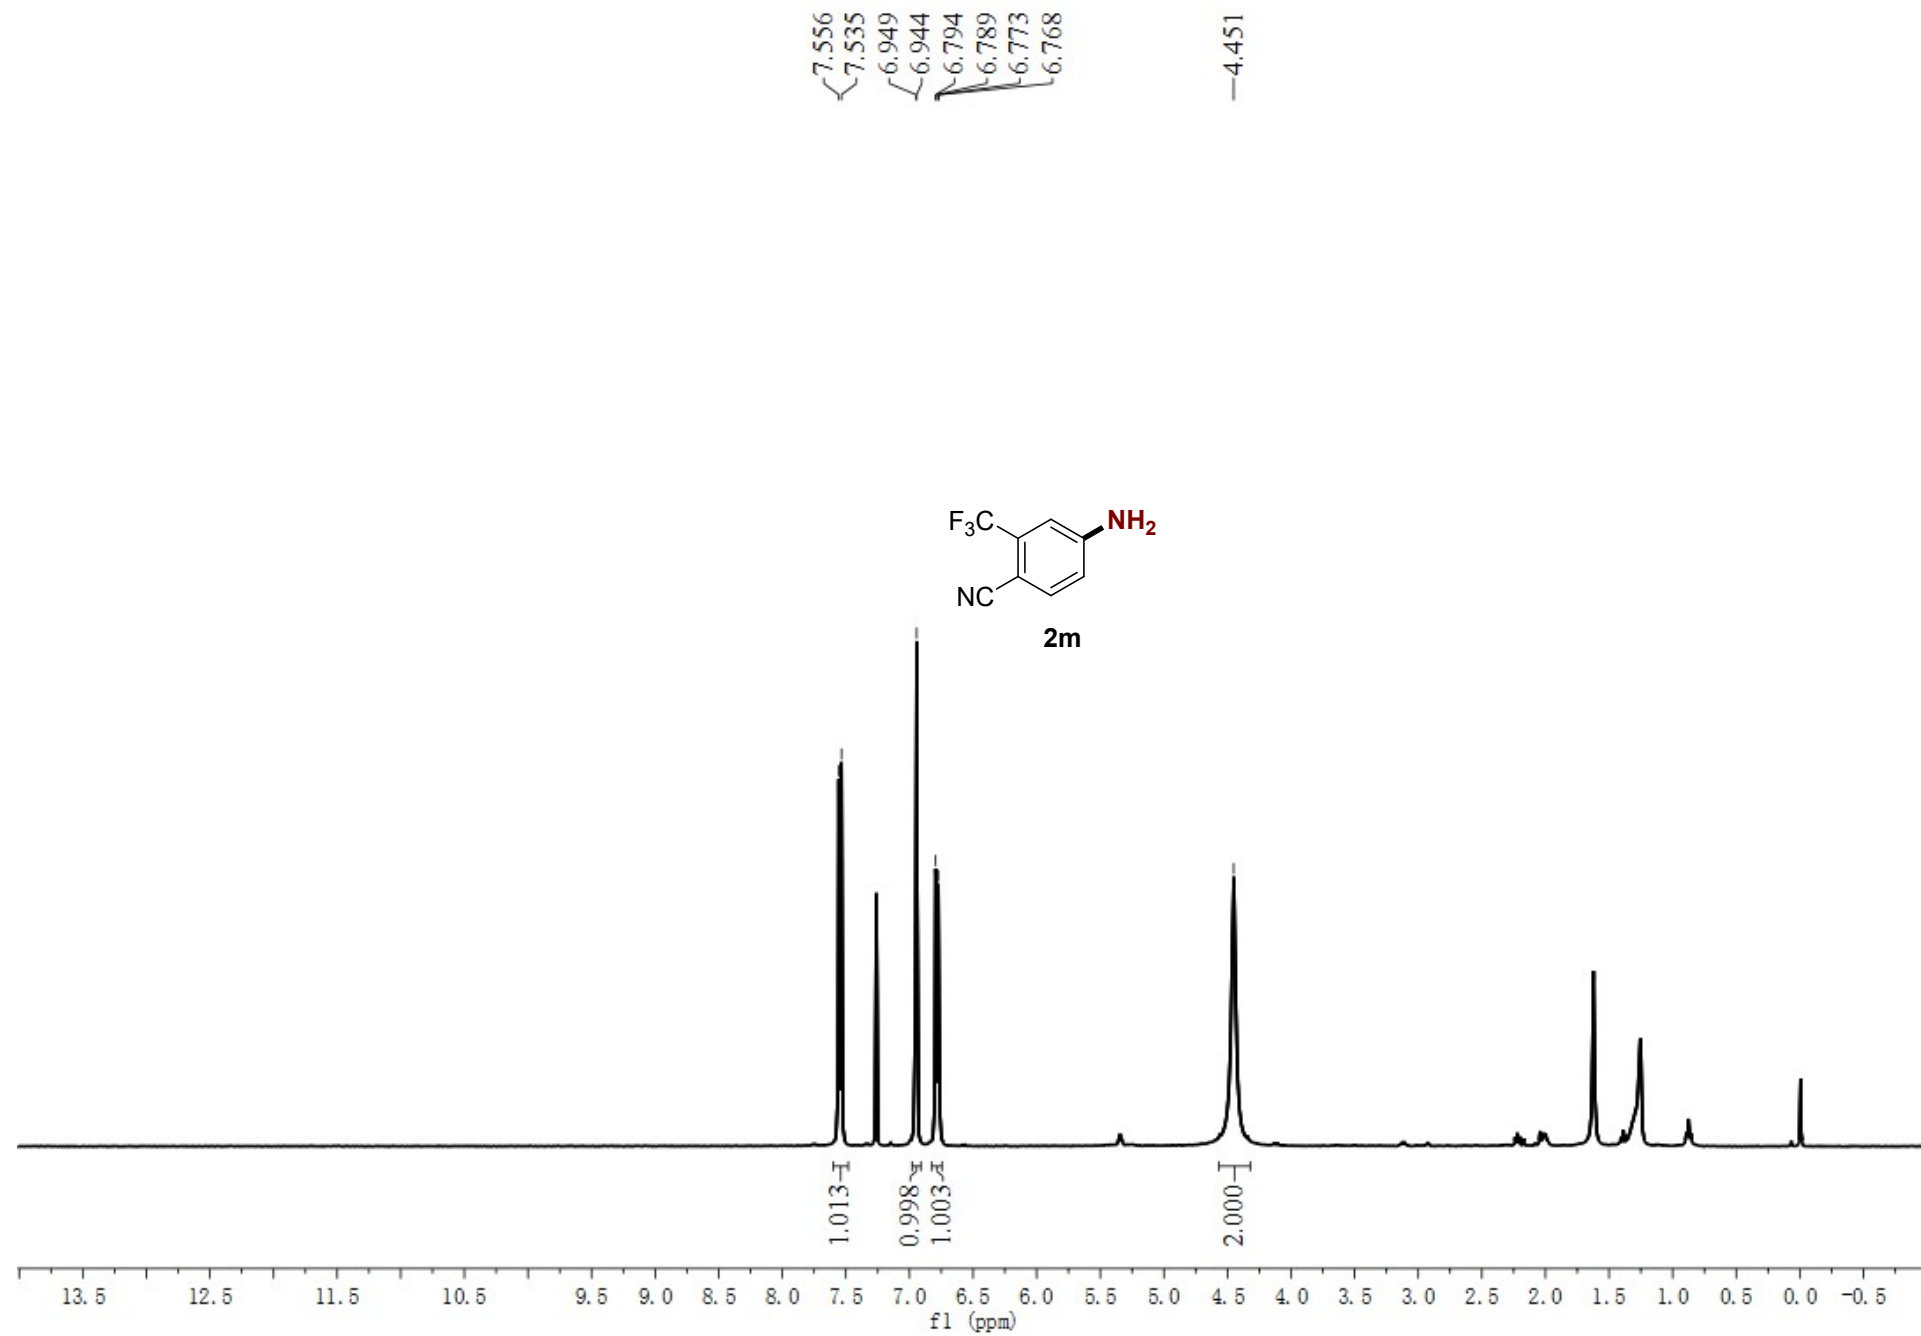

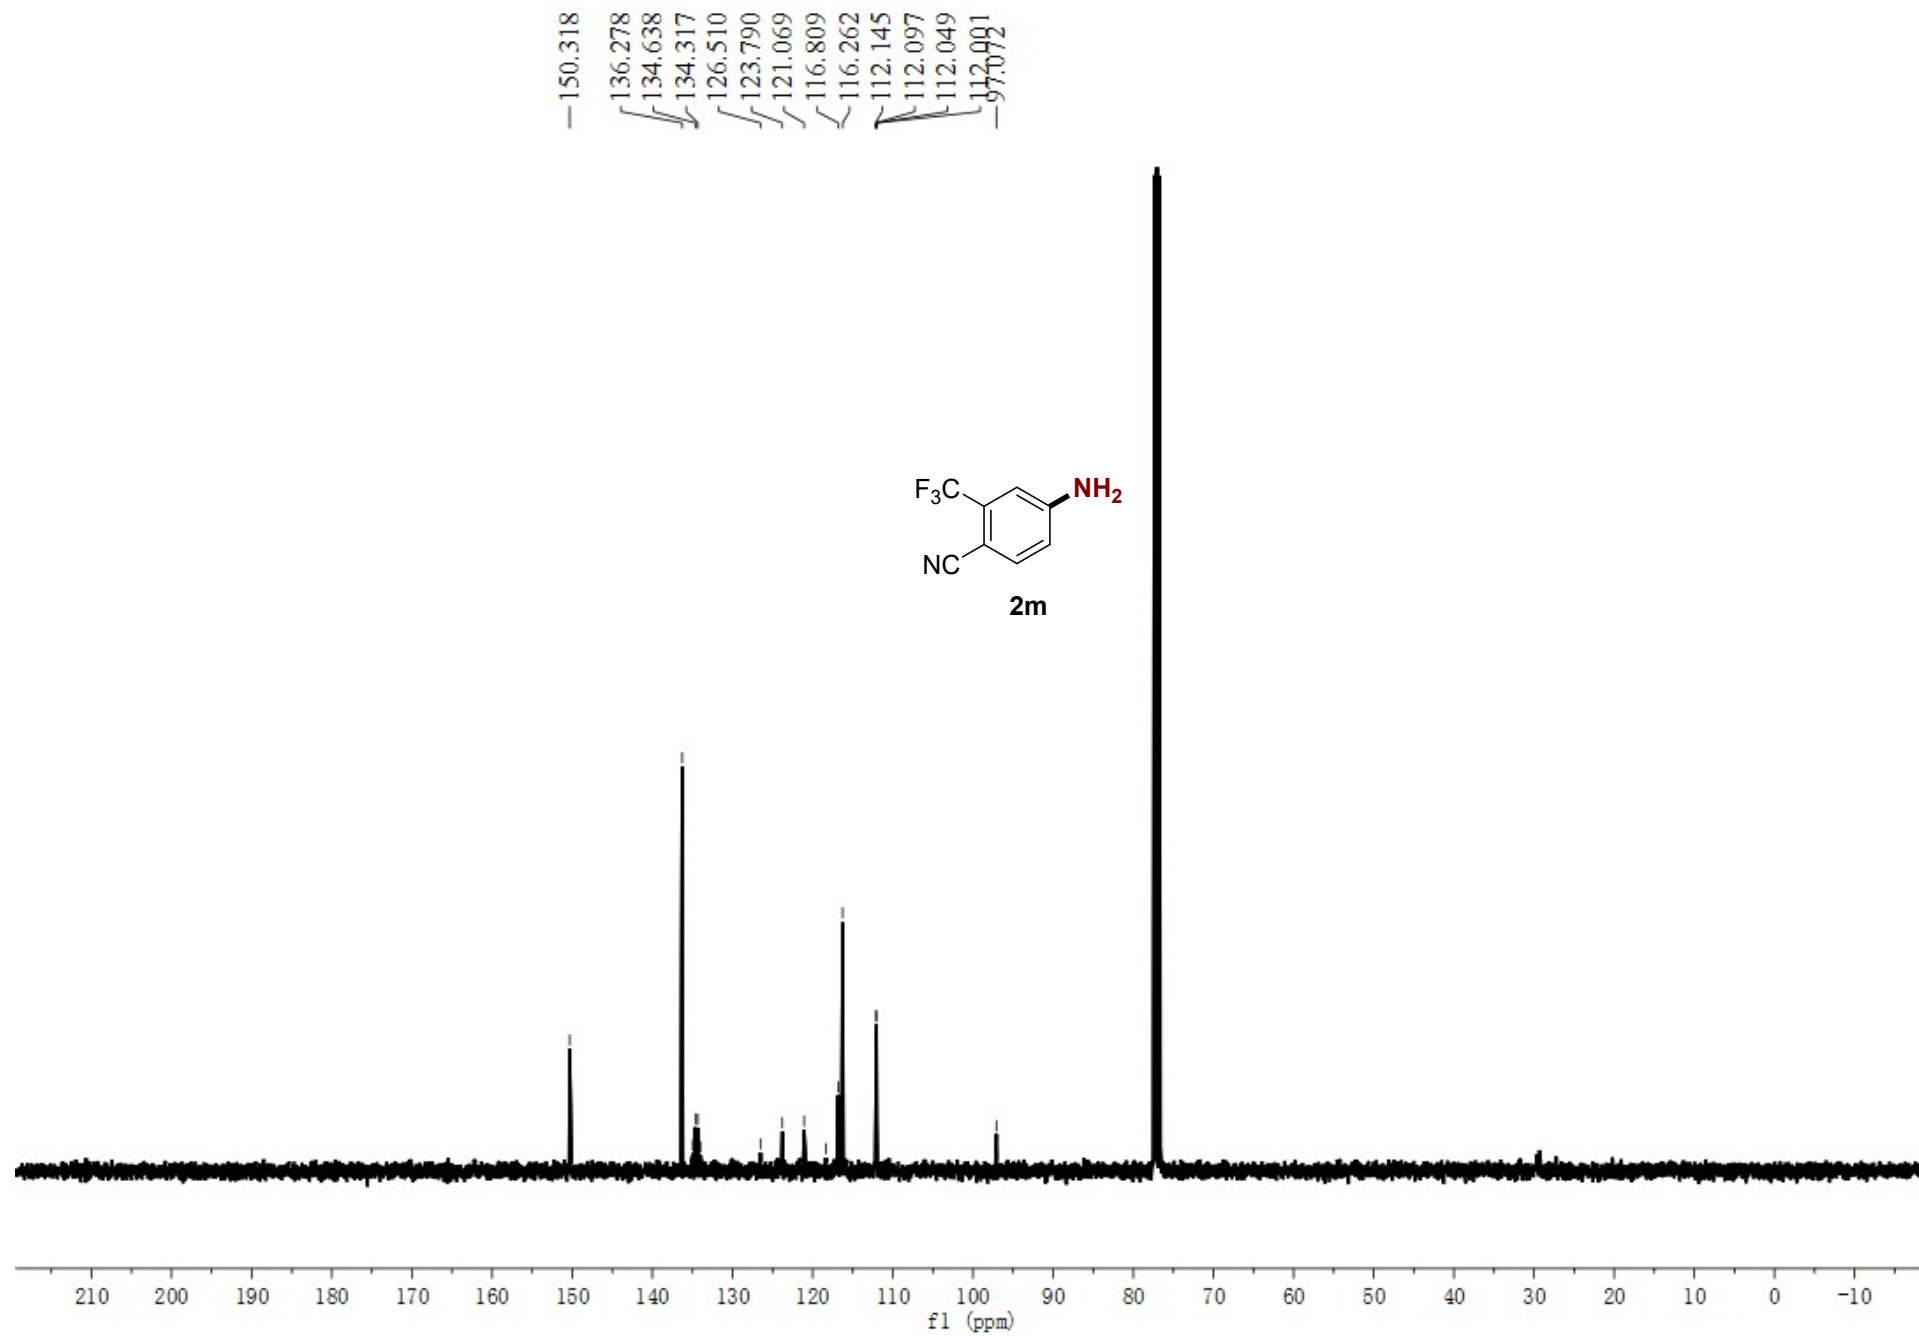

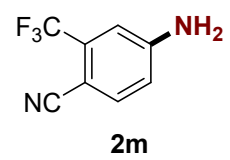

— -62.548

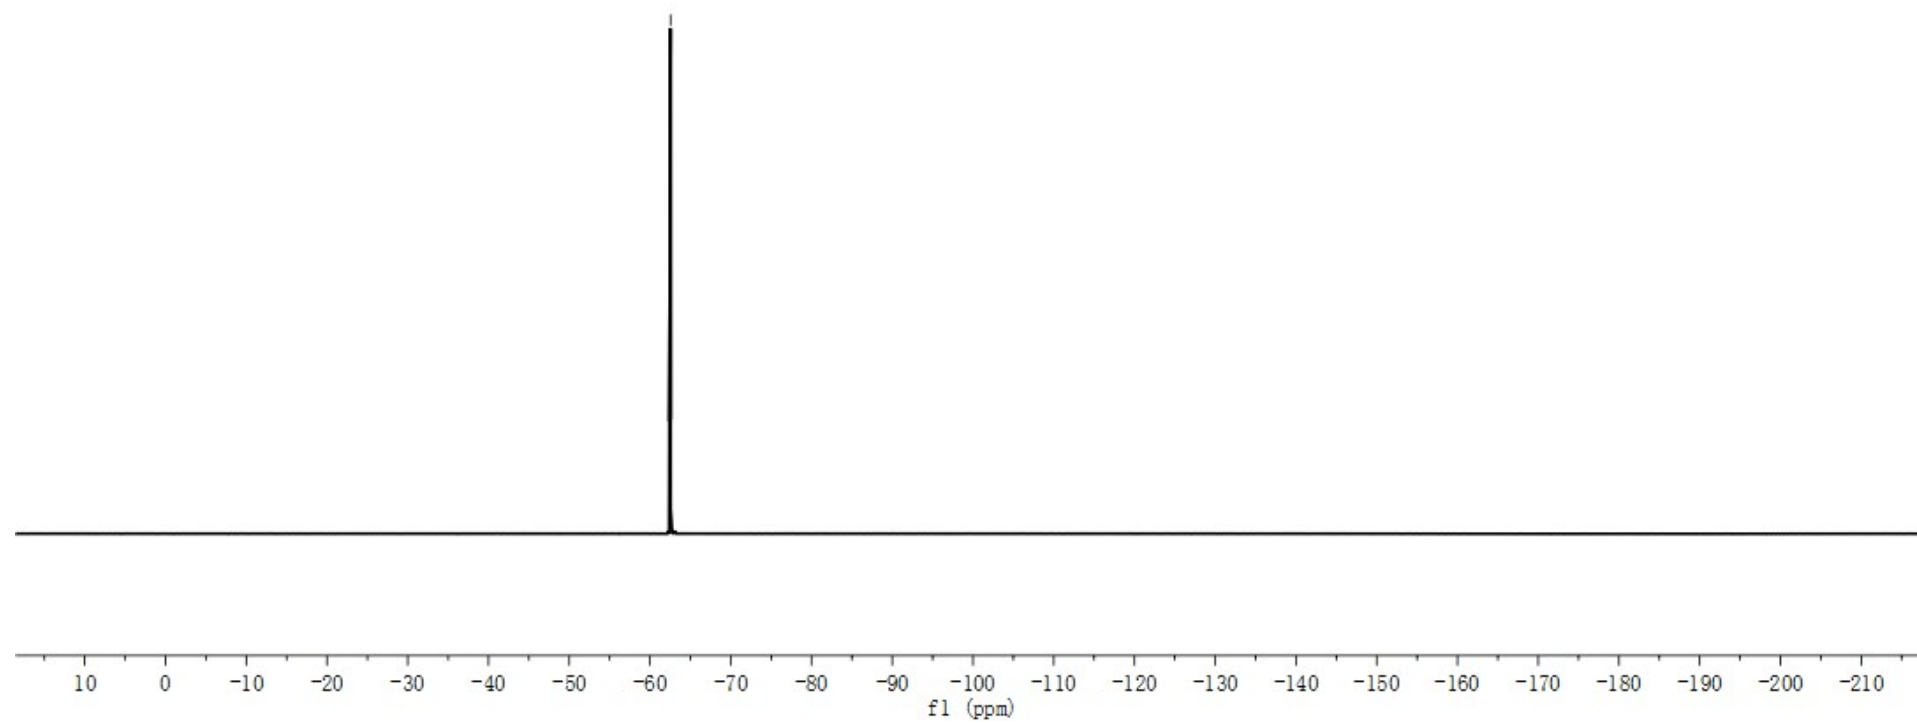

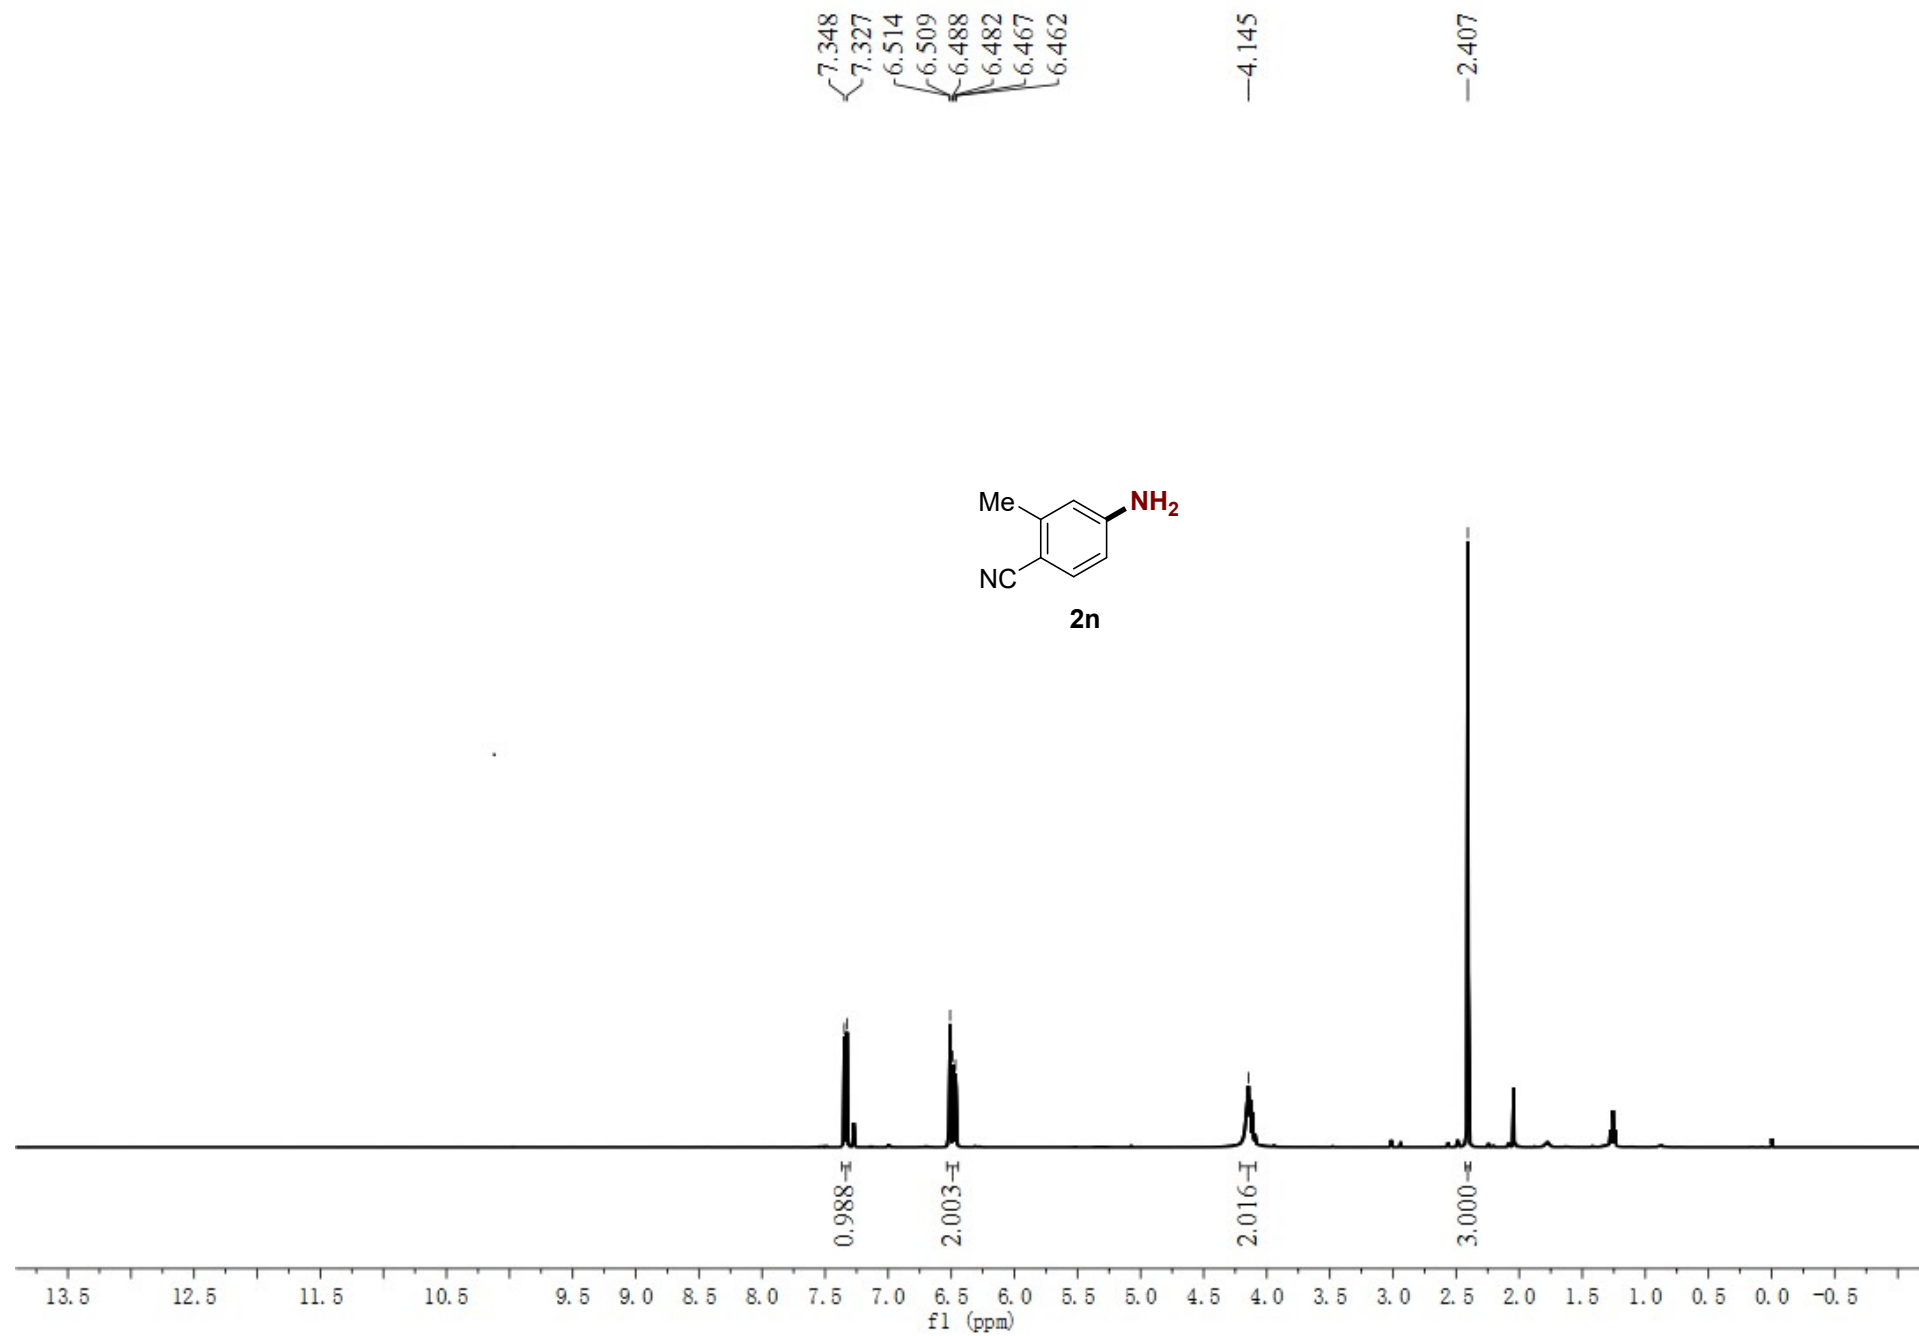

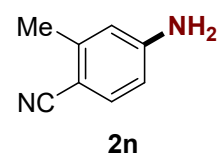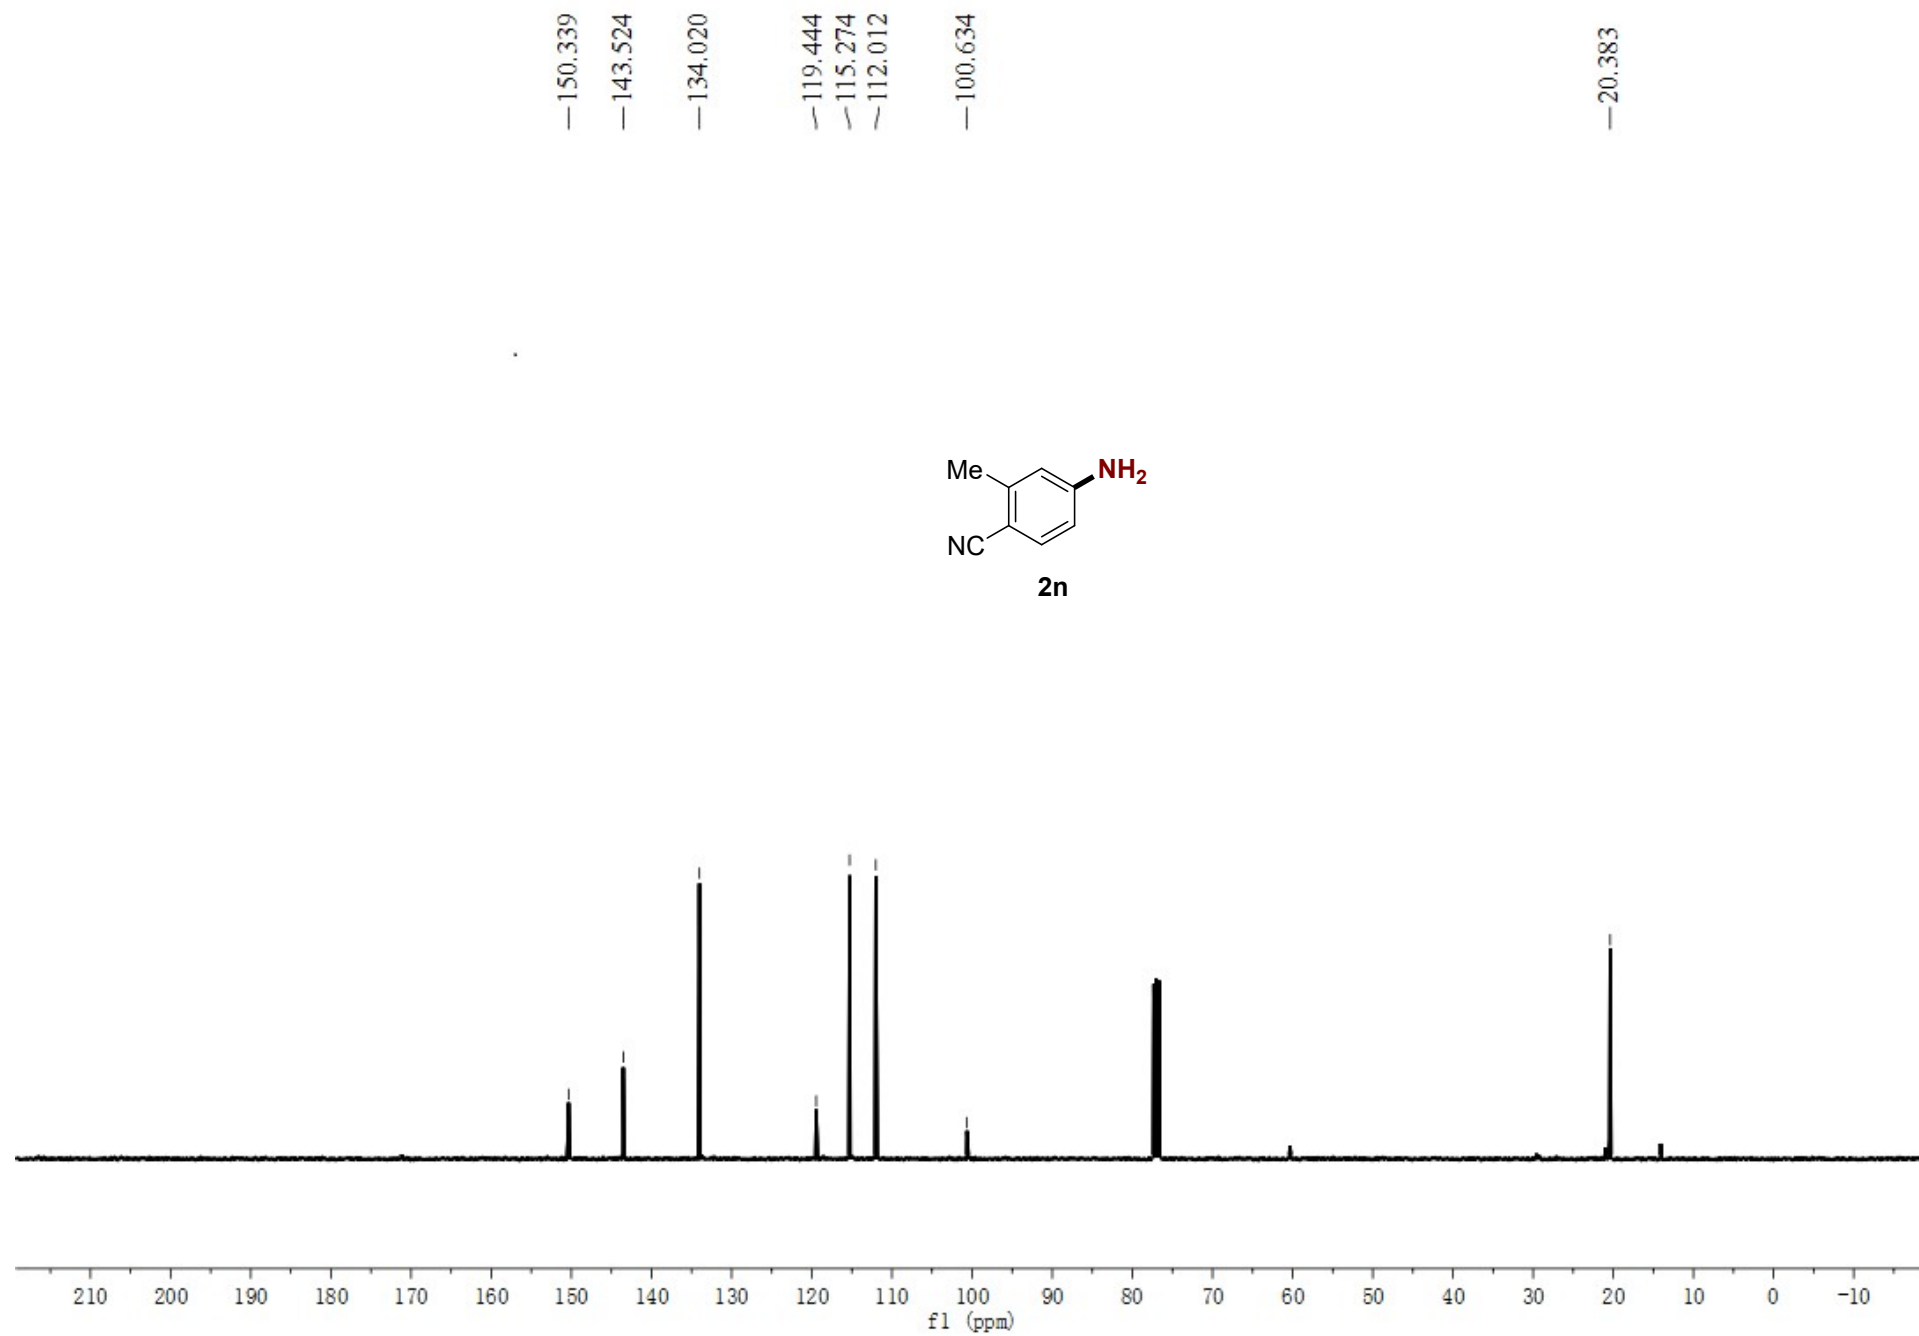

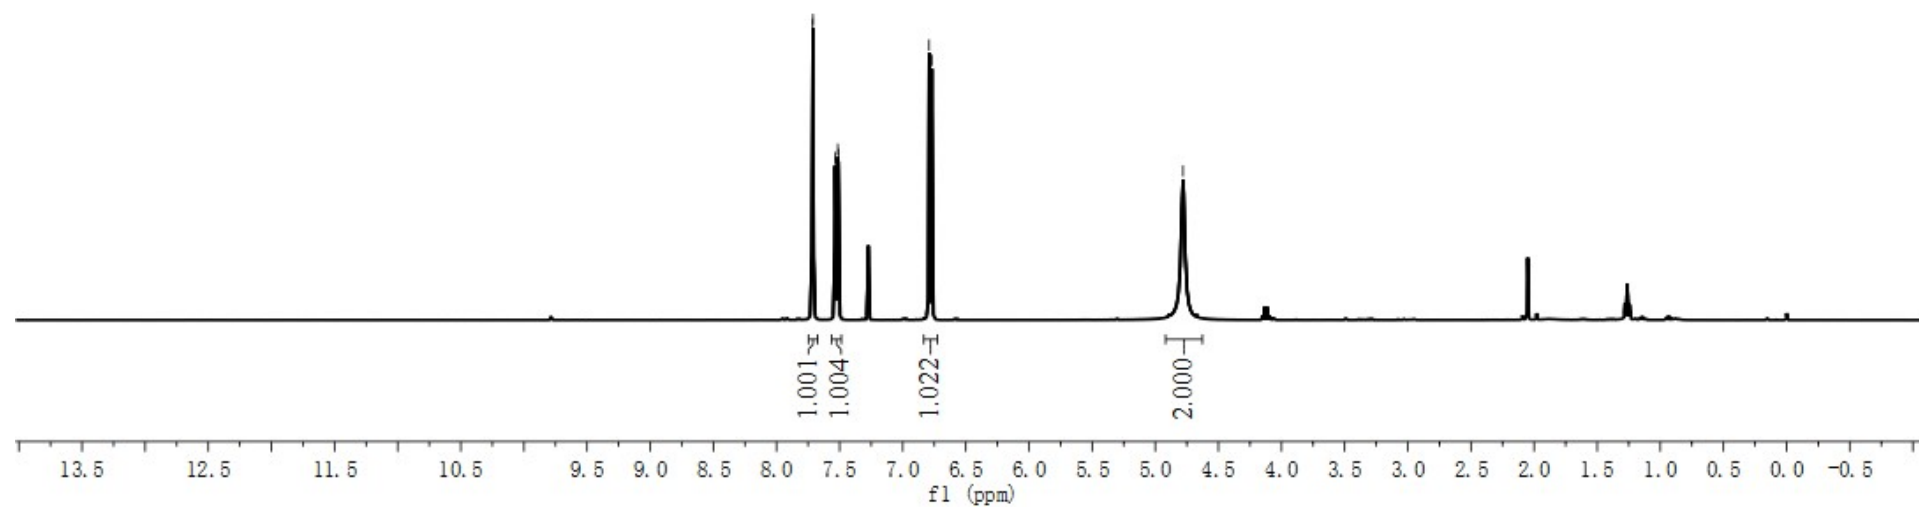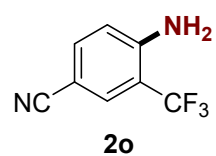

7.713  
7.711  
7.535  
7.531  
7.514  
7.509  
6.791  
6.770

4.780

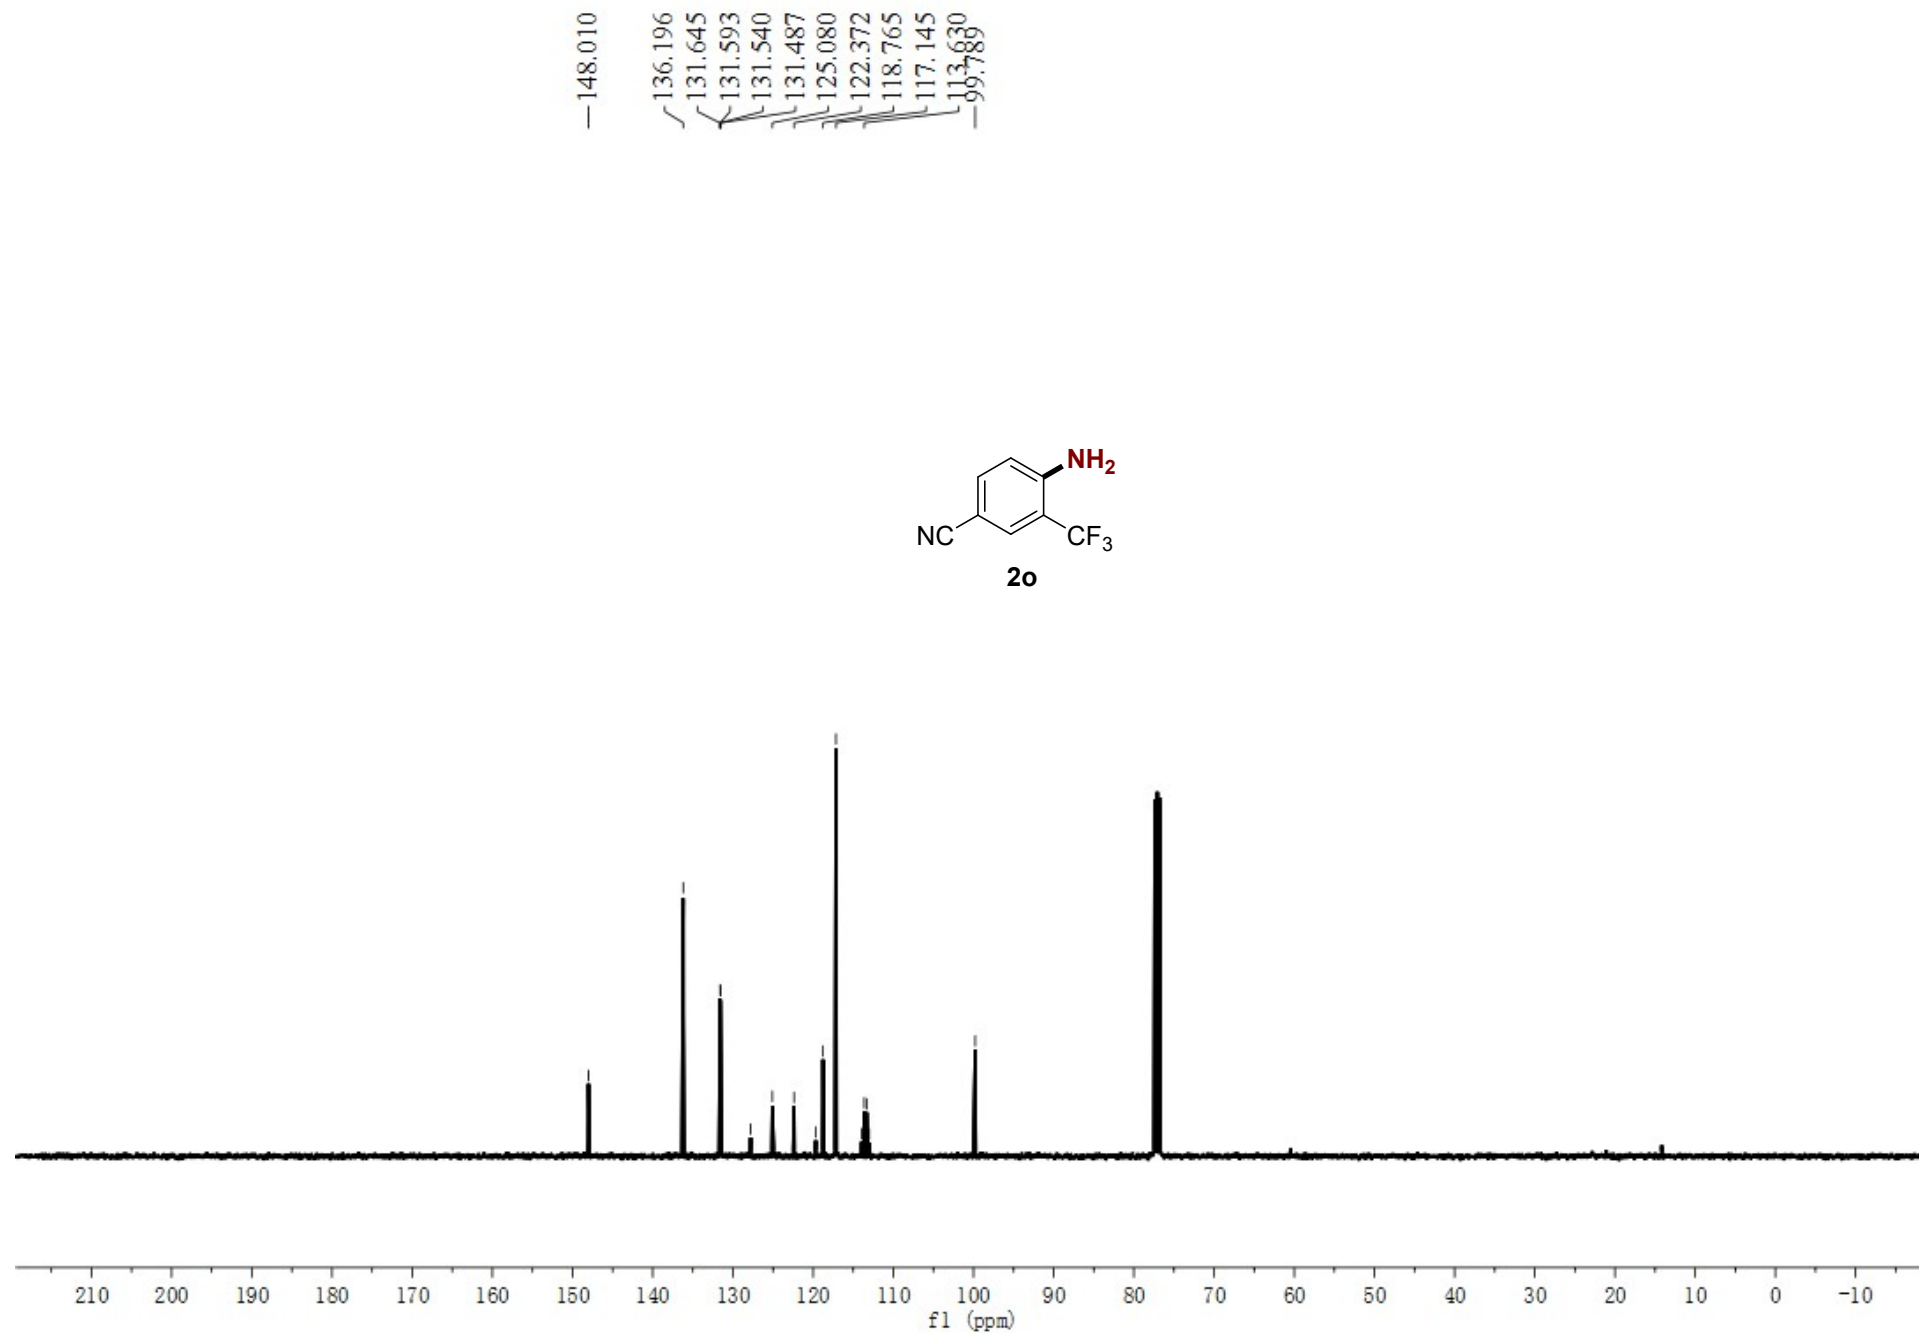

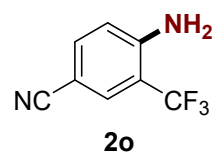

—63.632

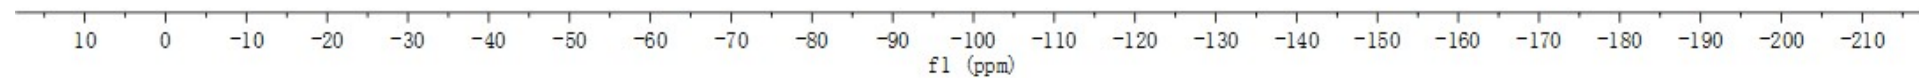

7.994  
7.989  
7.642  
7.637  
7.620  
7.615  
7.063  
6.860  
6.838

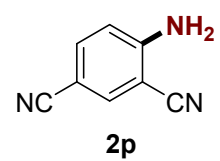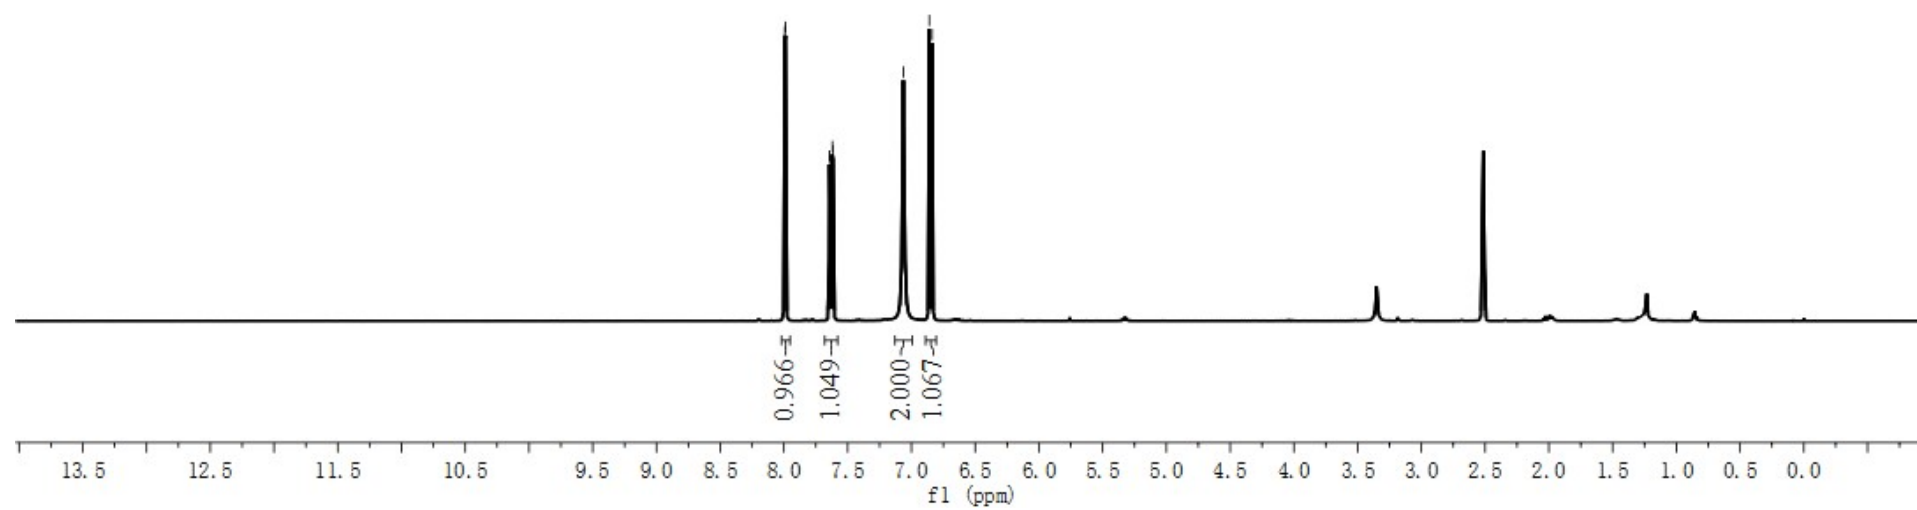

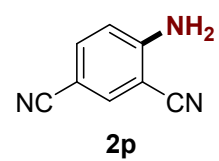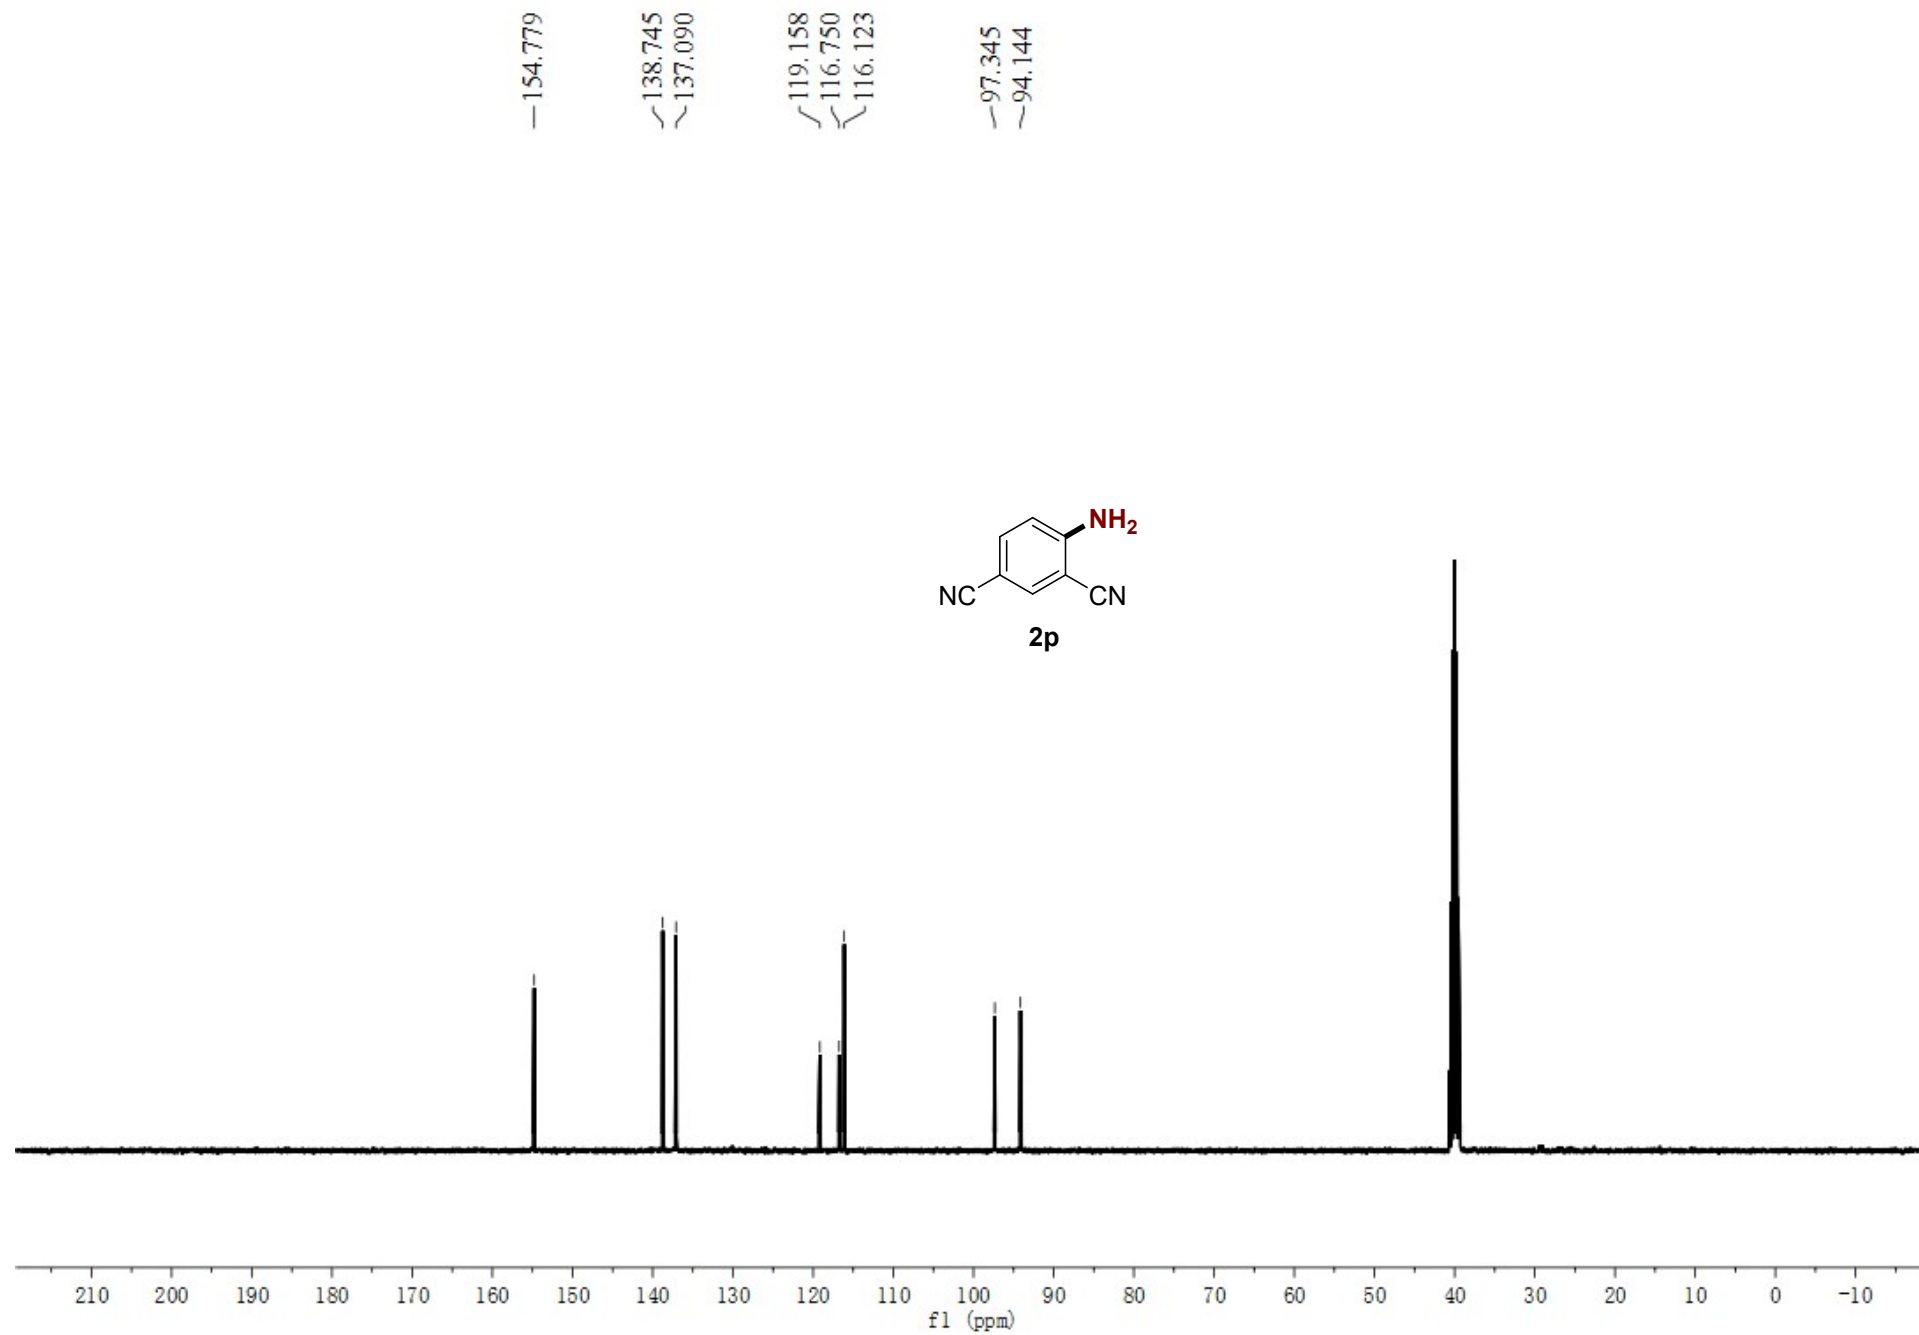

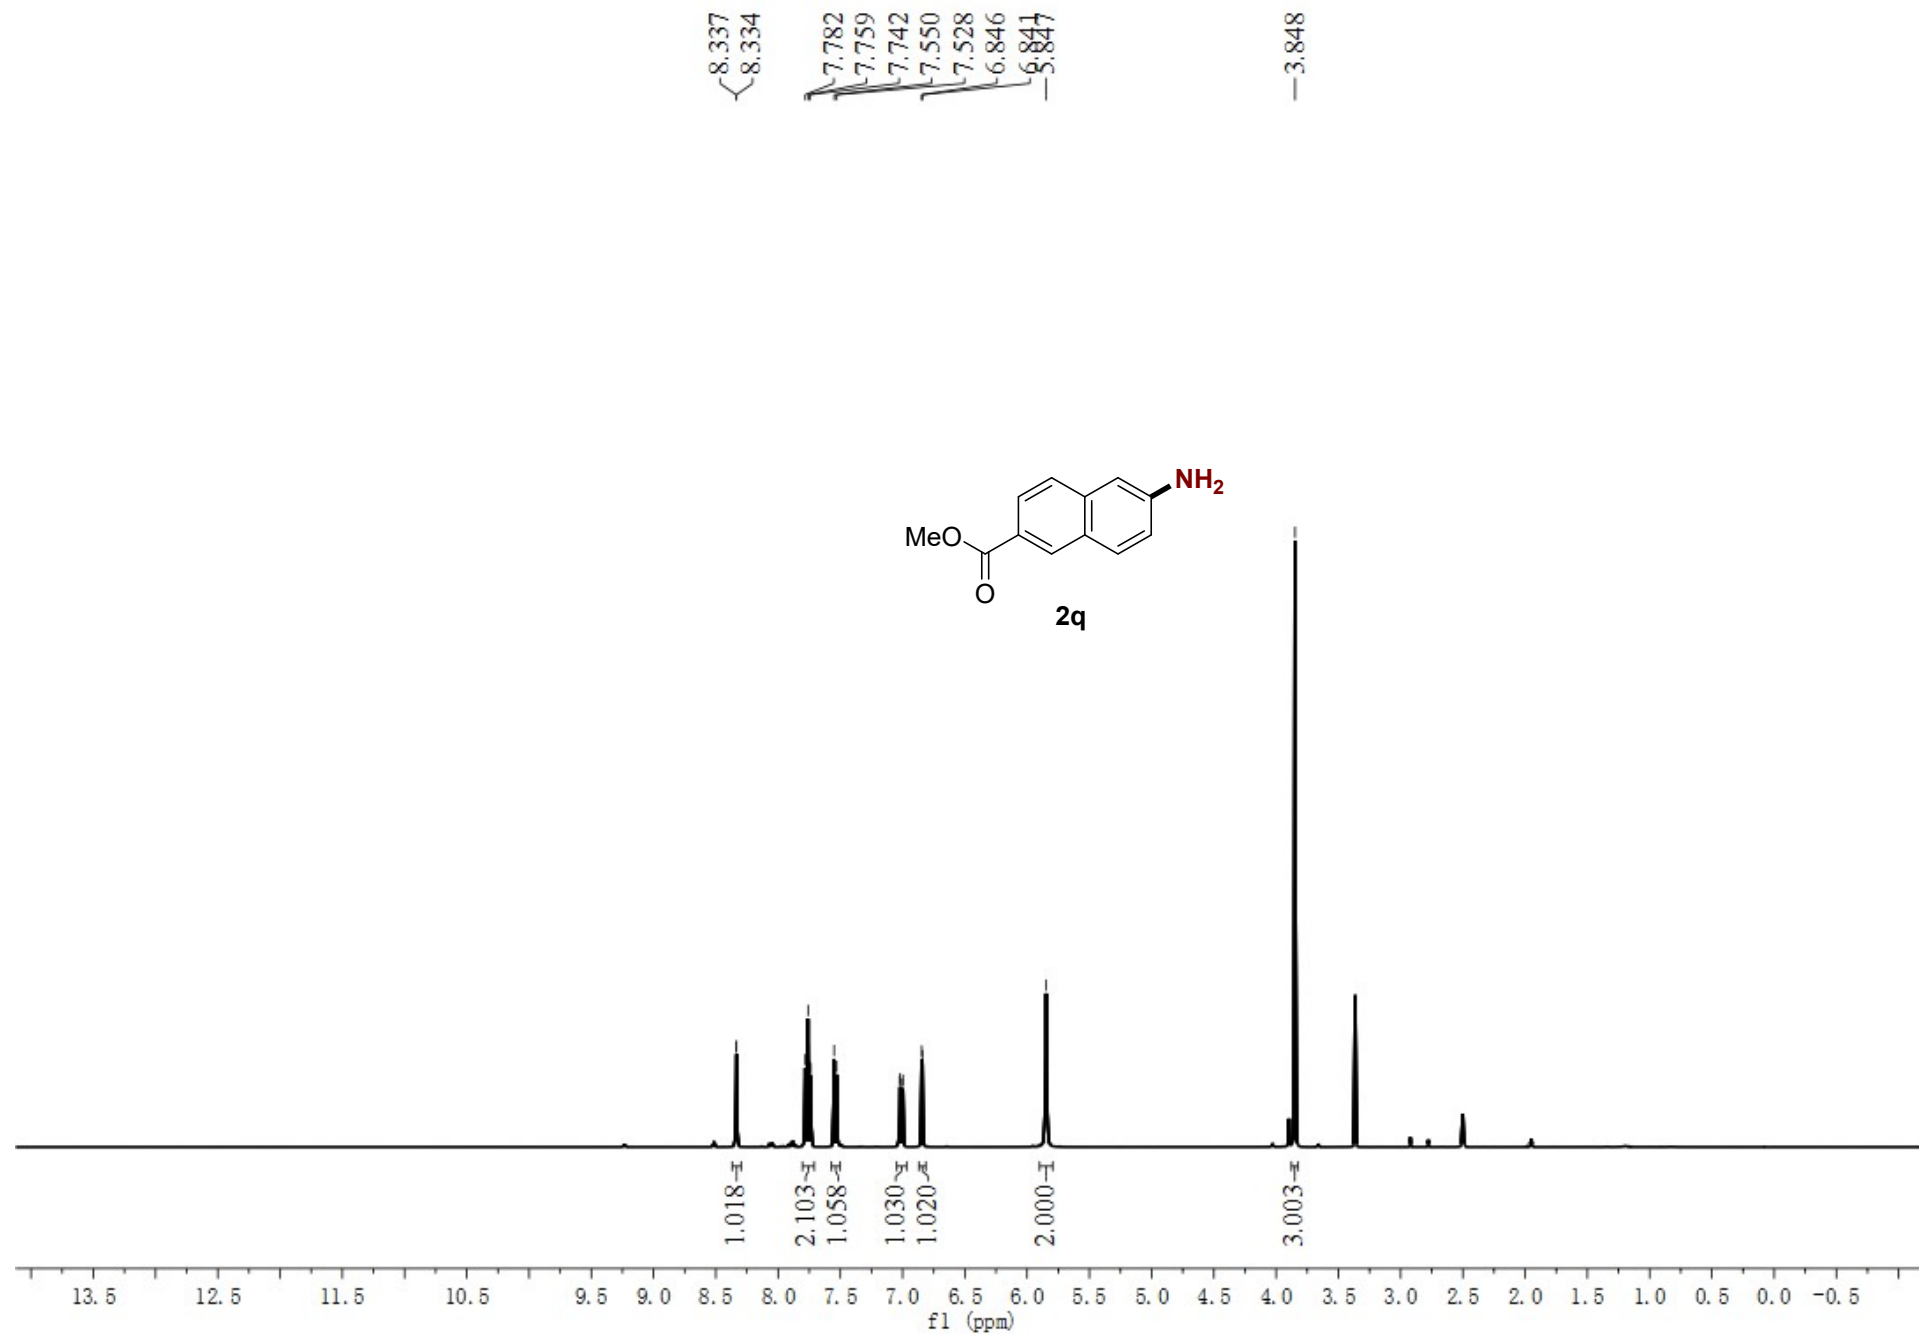

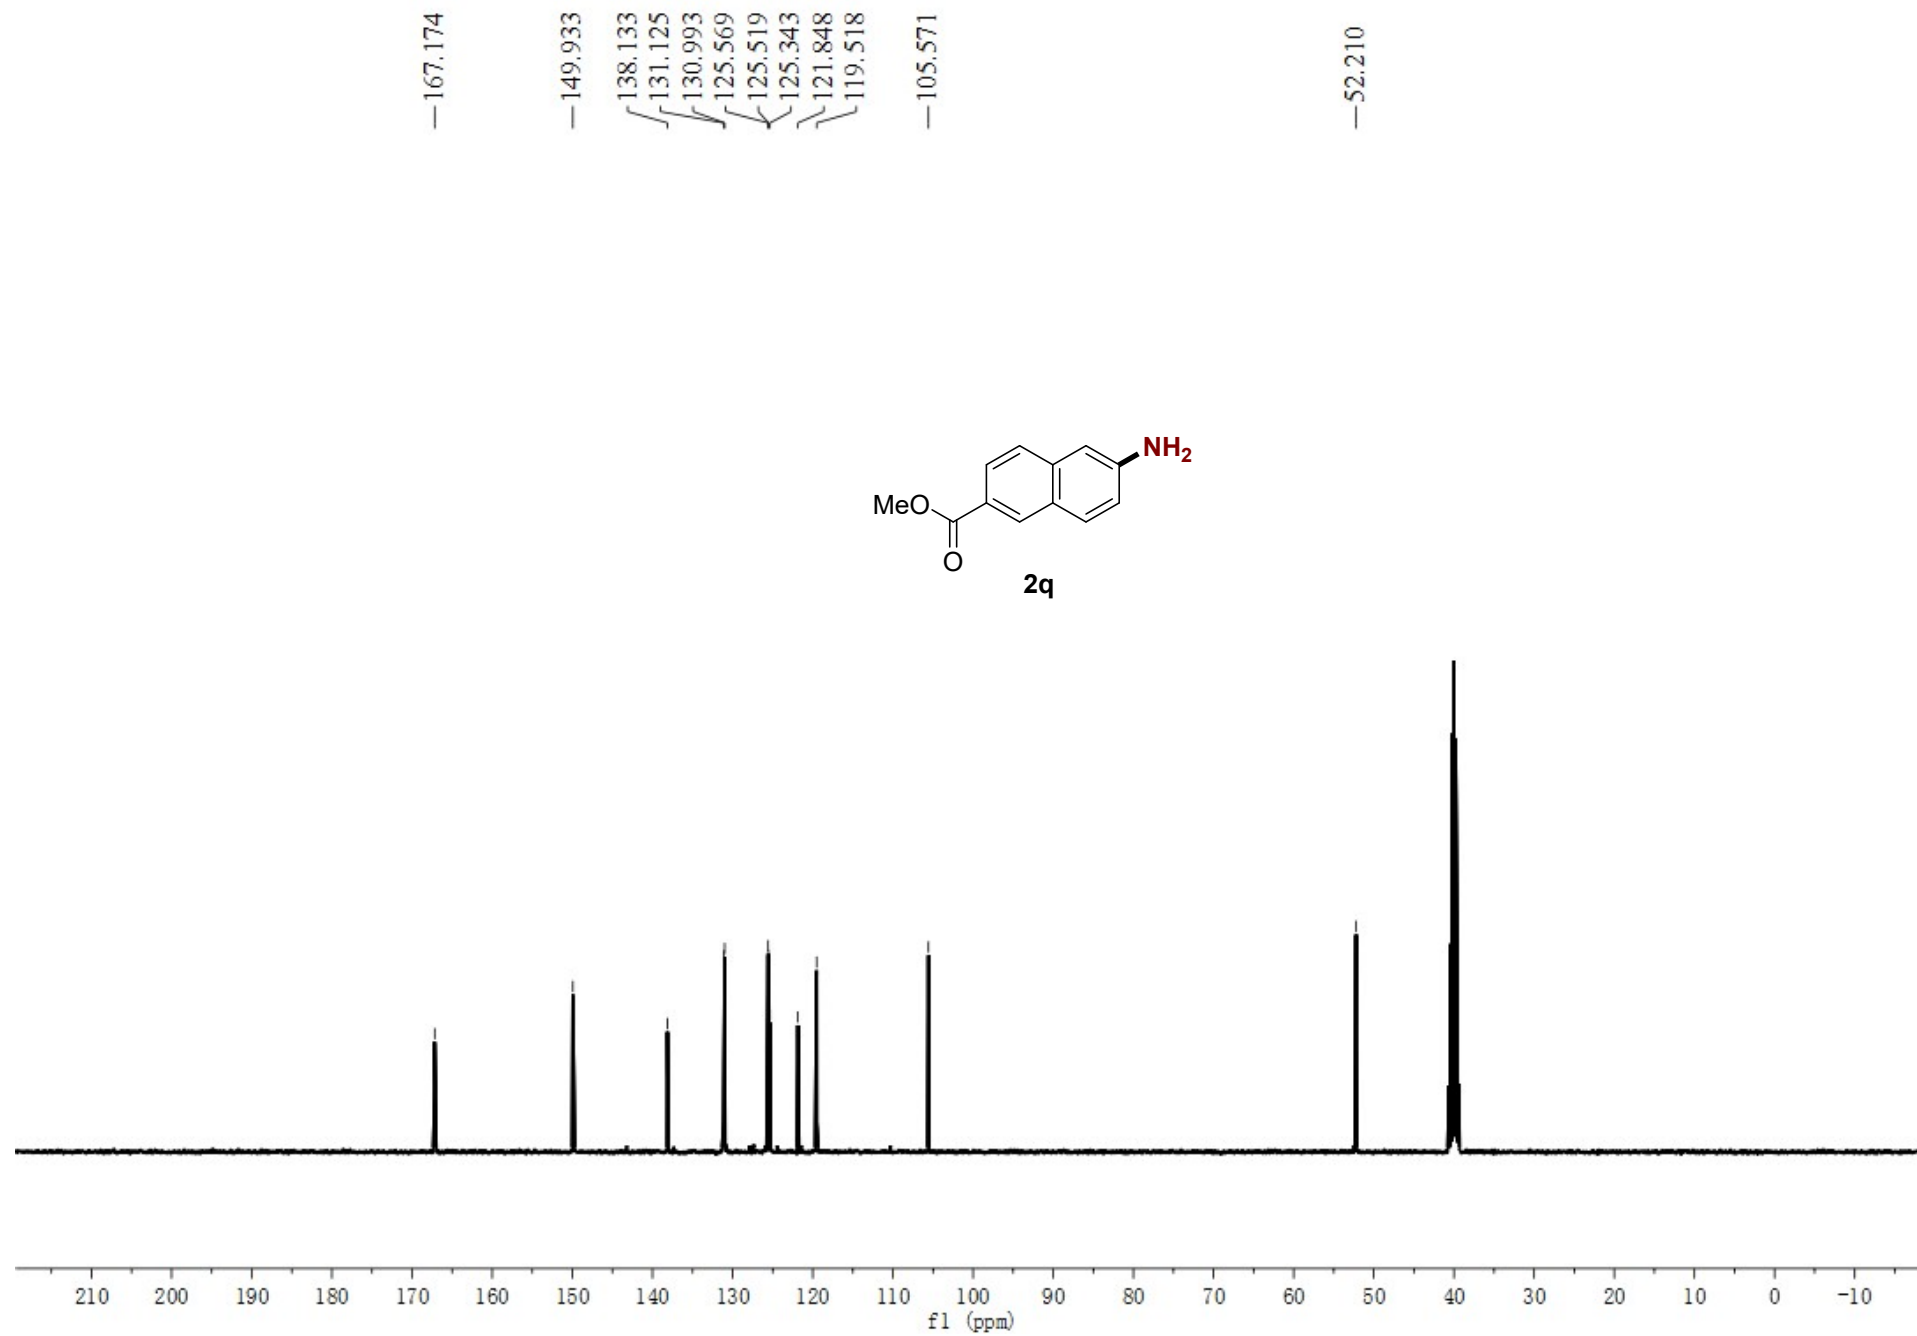

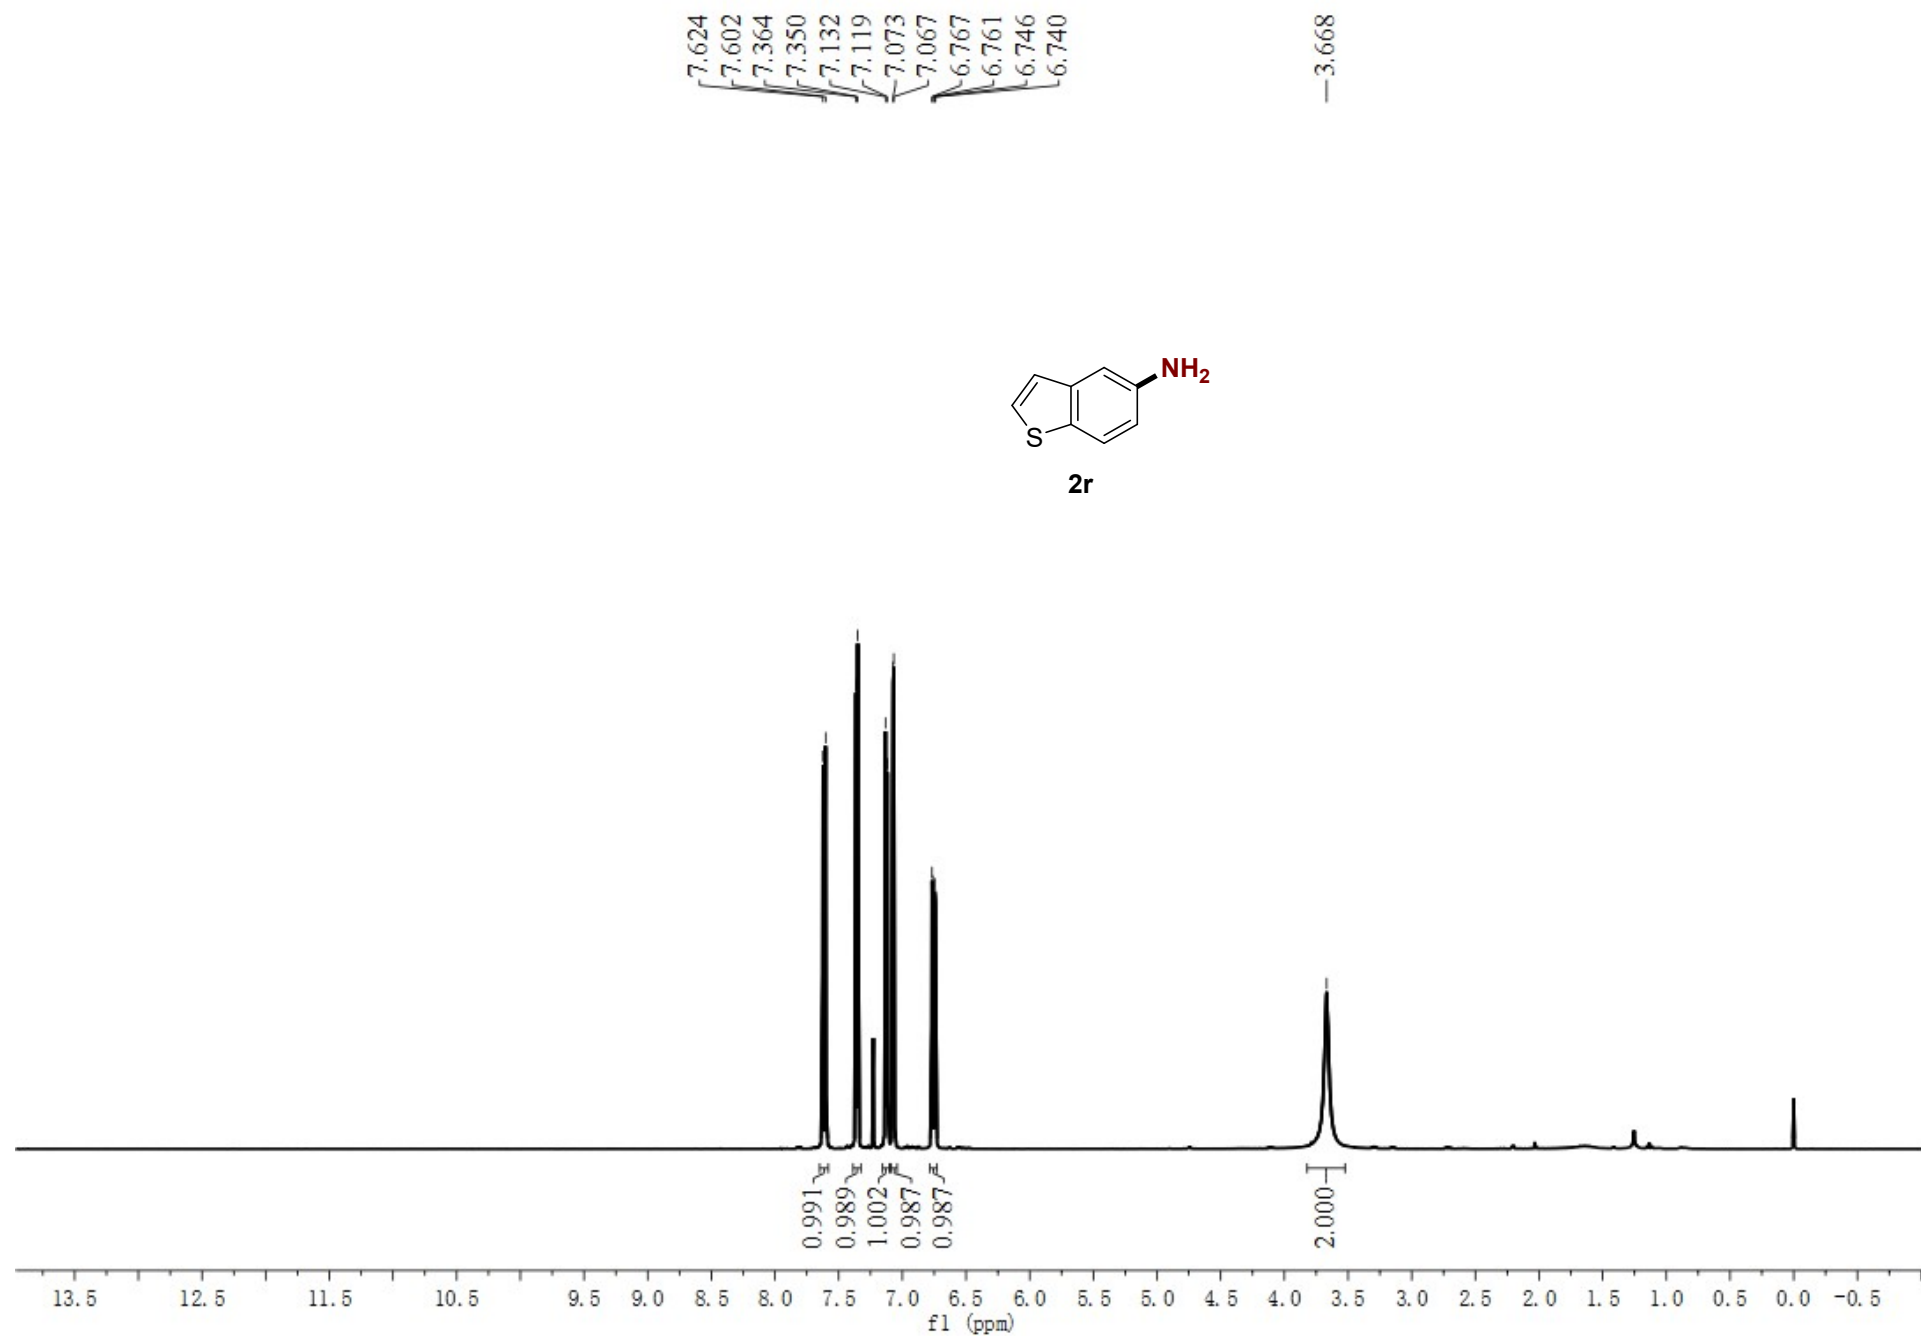

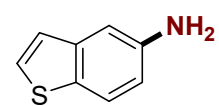

2r

~143.506  
~140.822  
  
~130.362  
~127.037  
~123.001  
~122.902  
~114.807  
~108.226

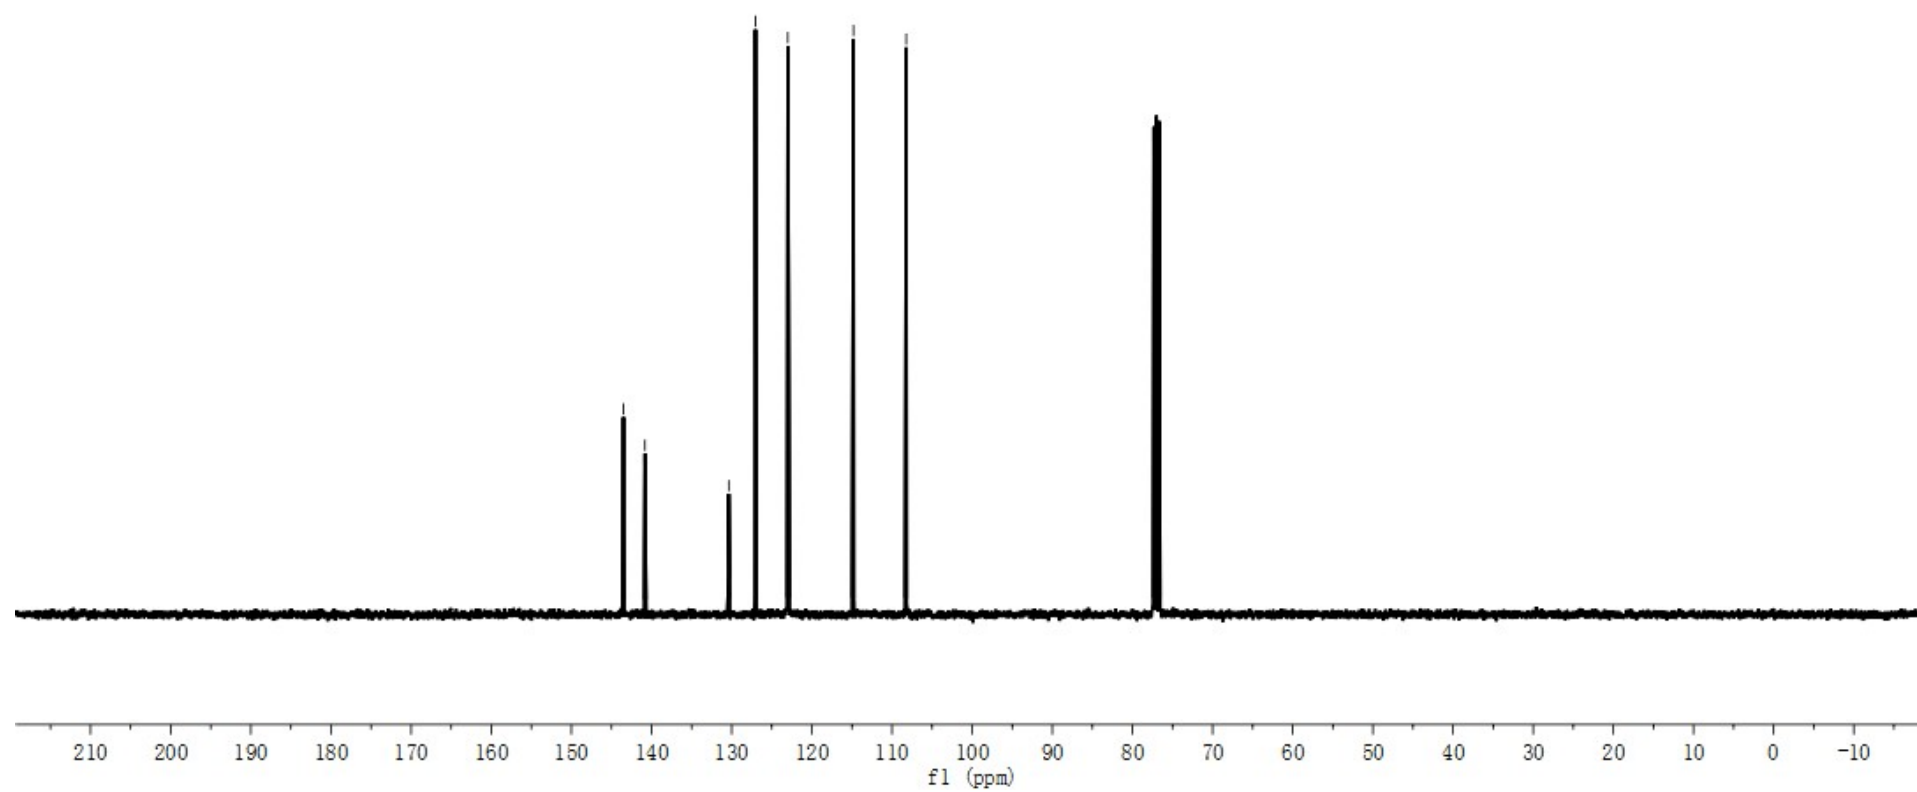

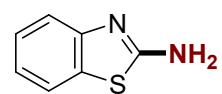

**2s**

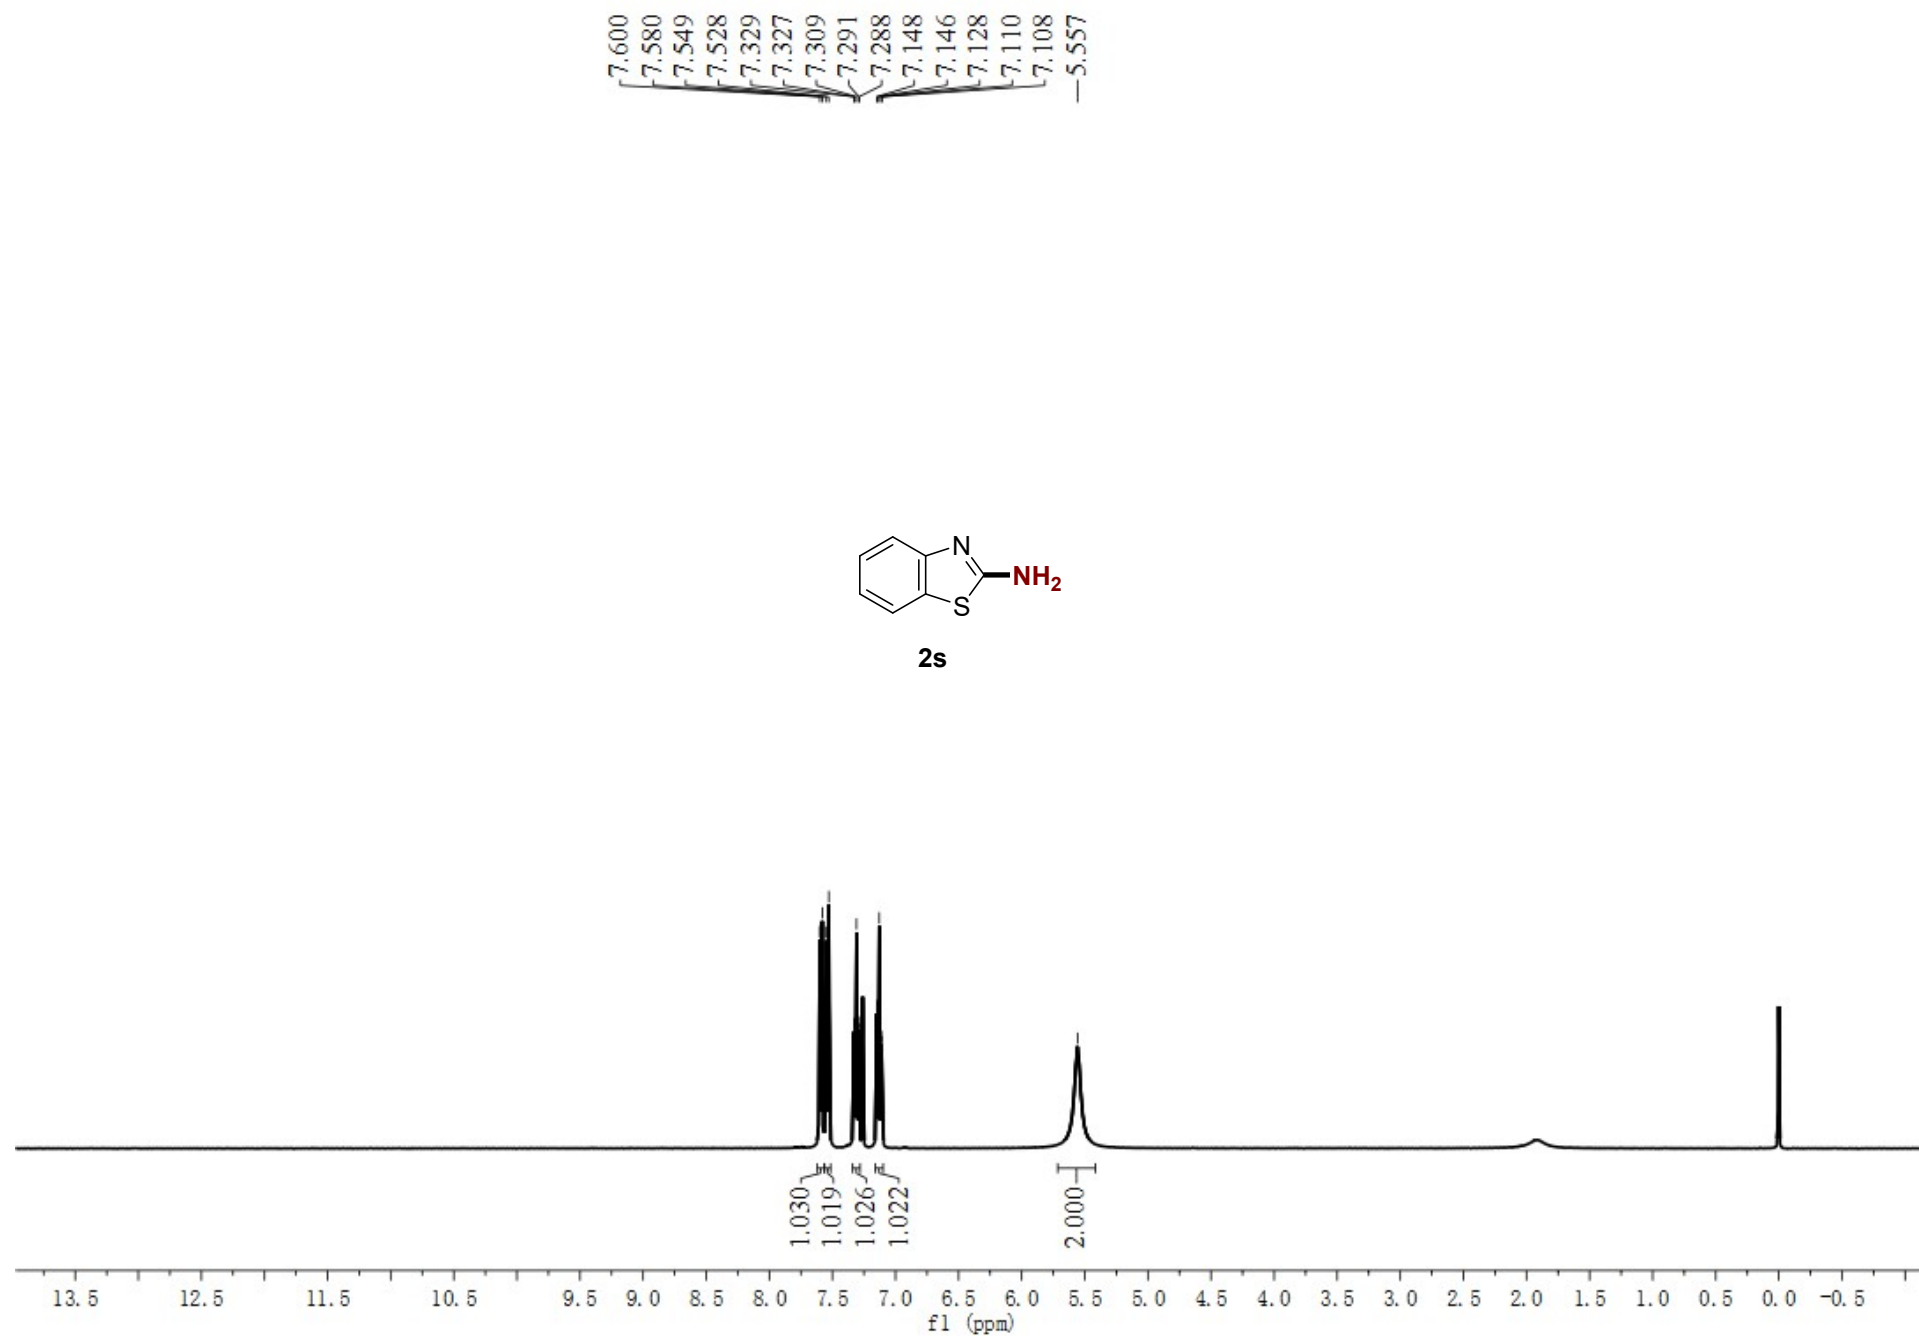

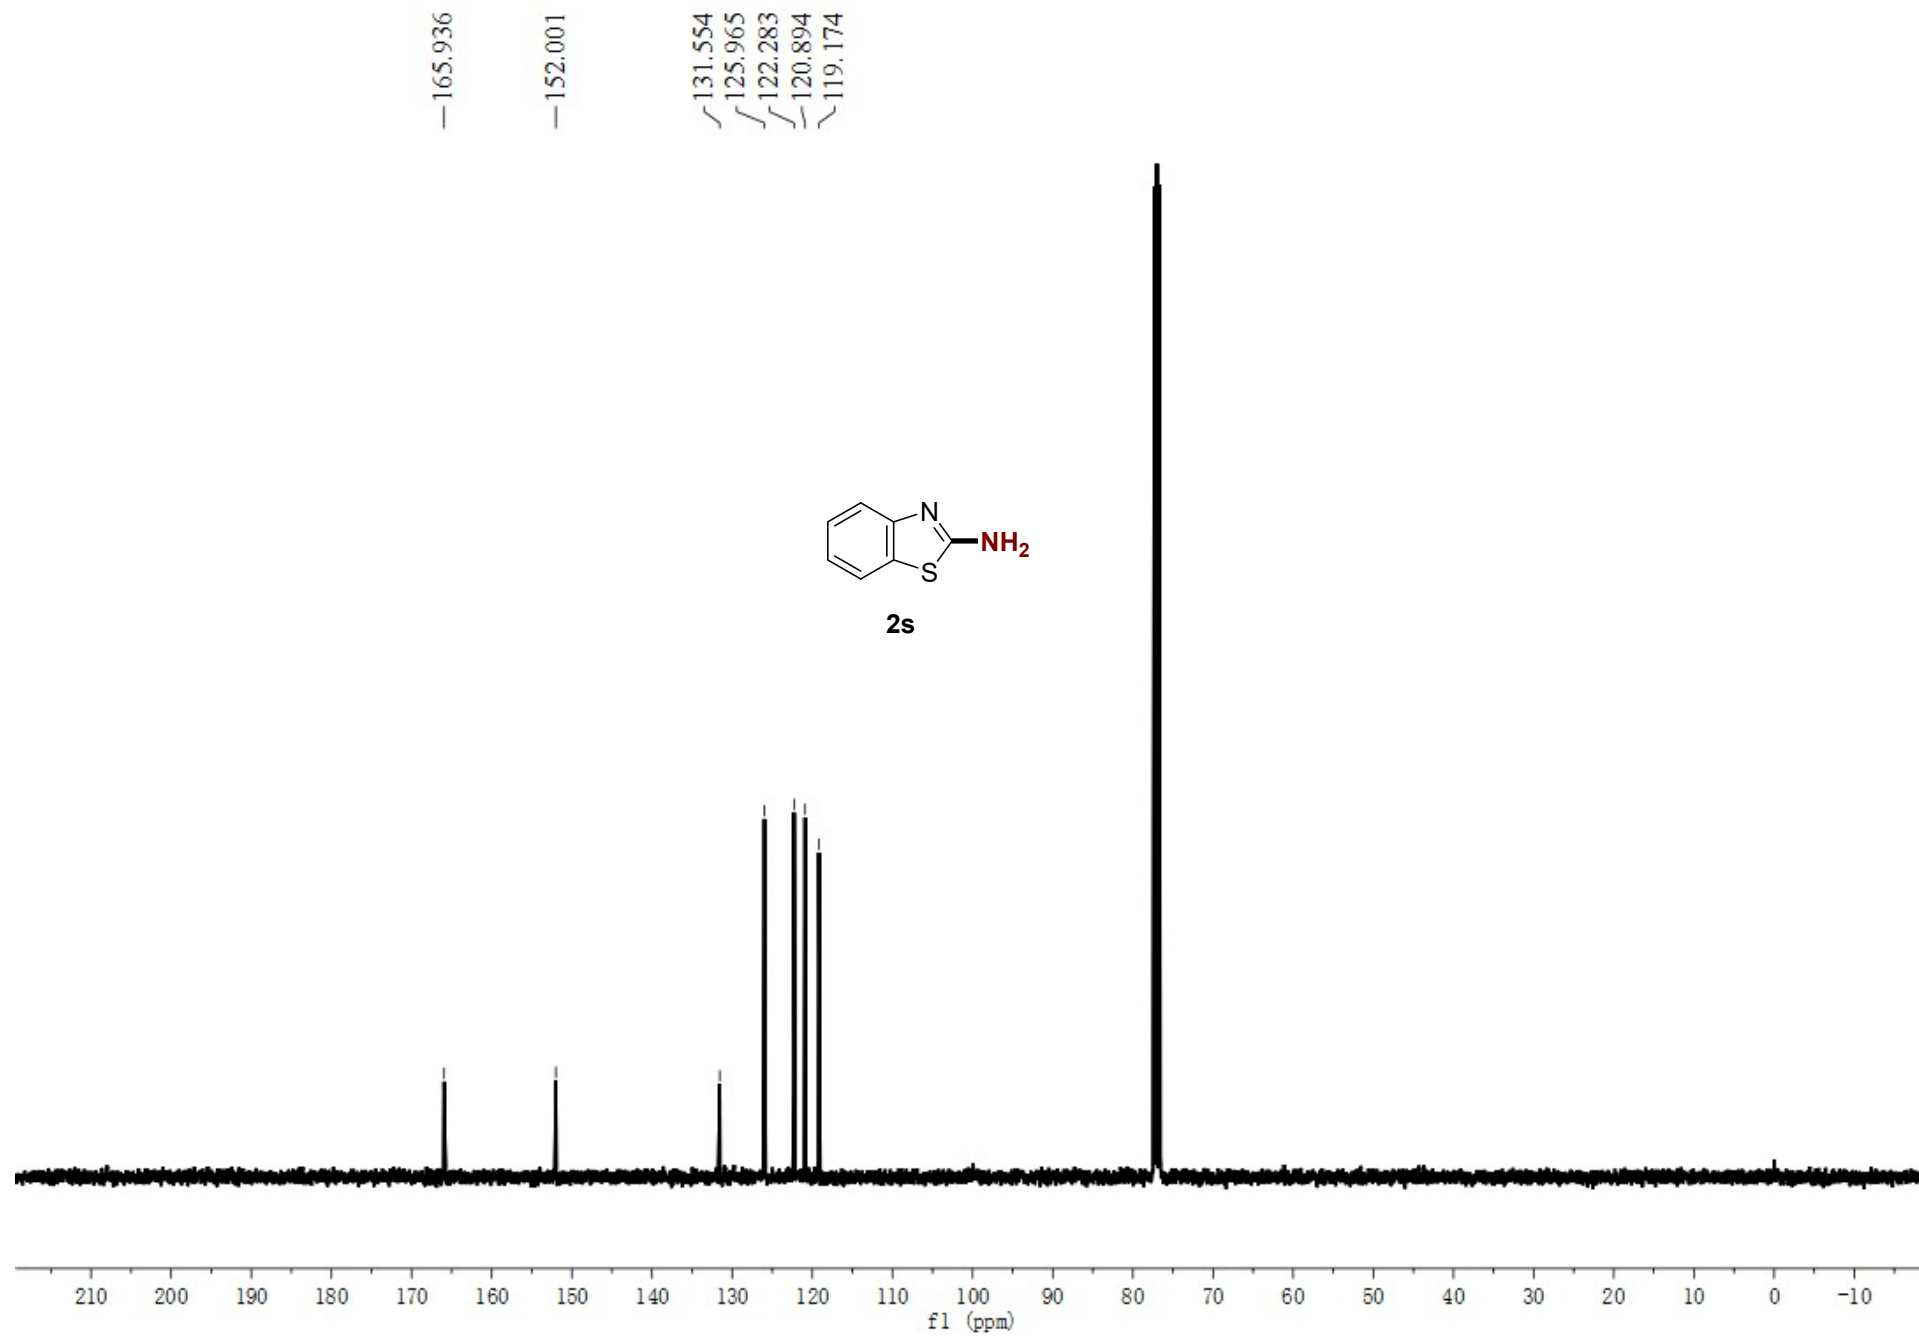

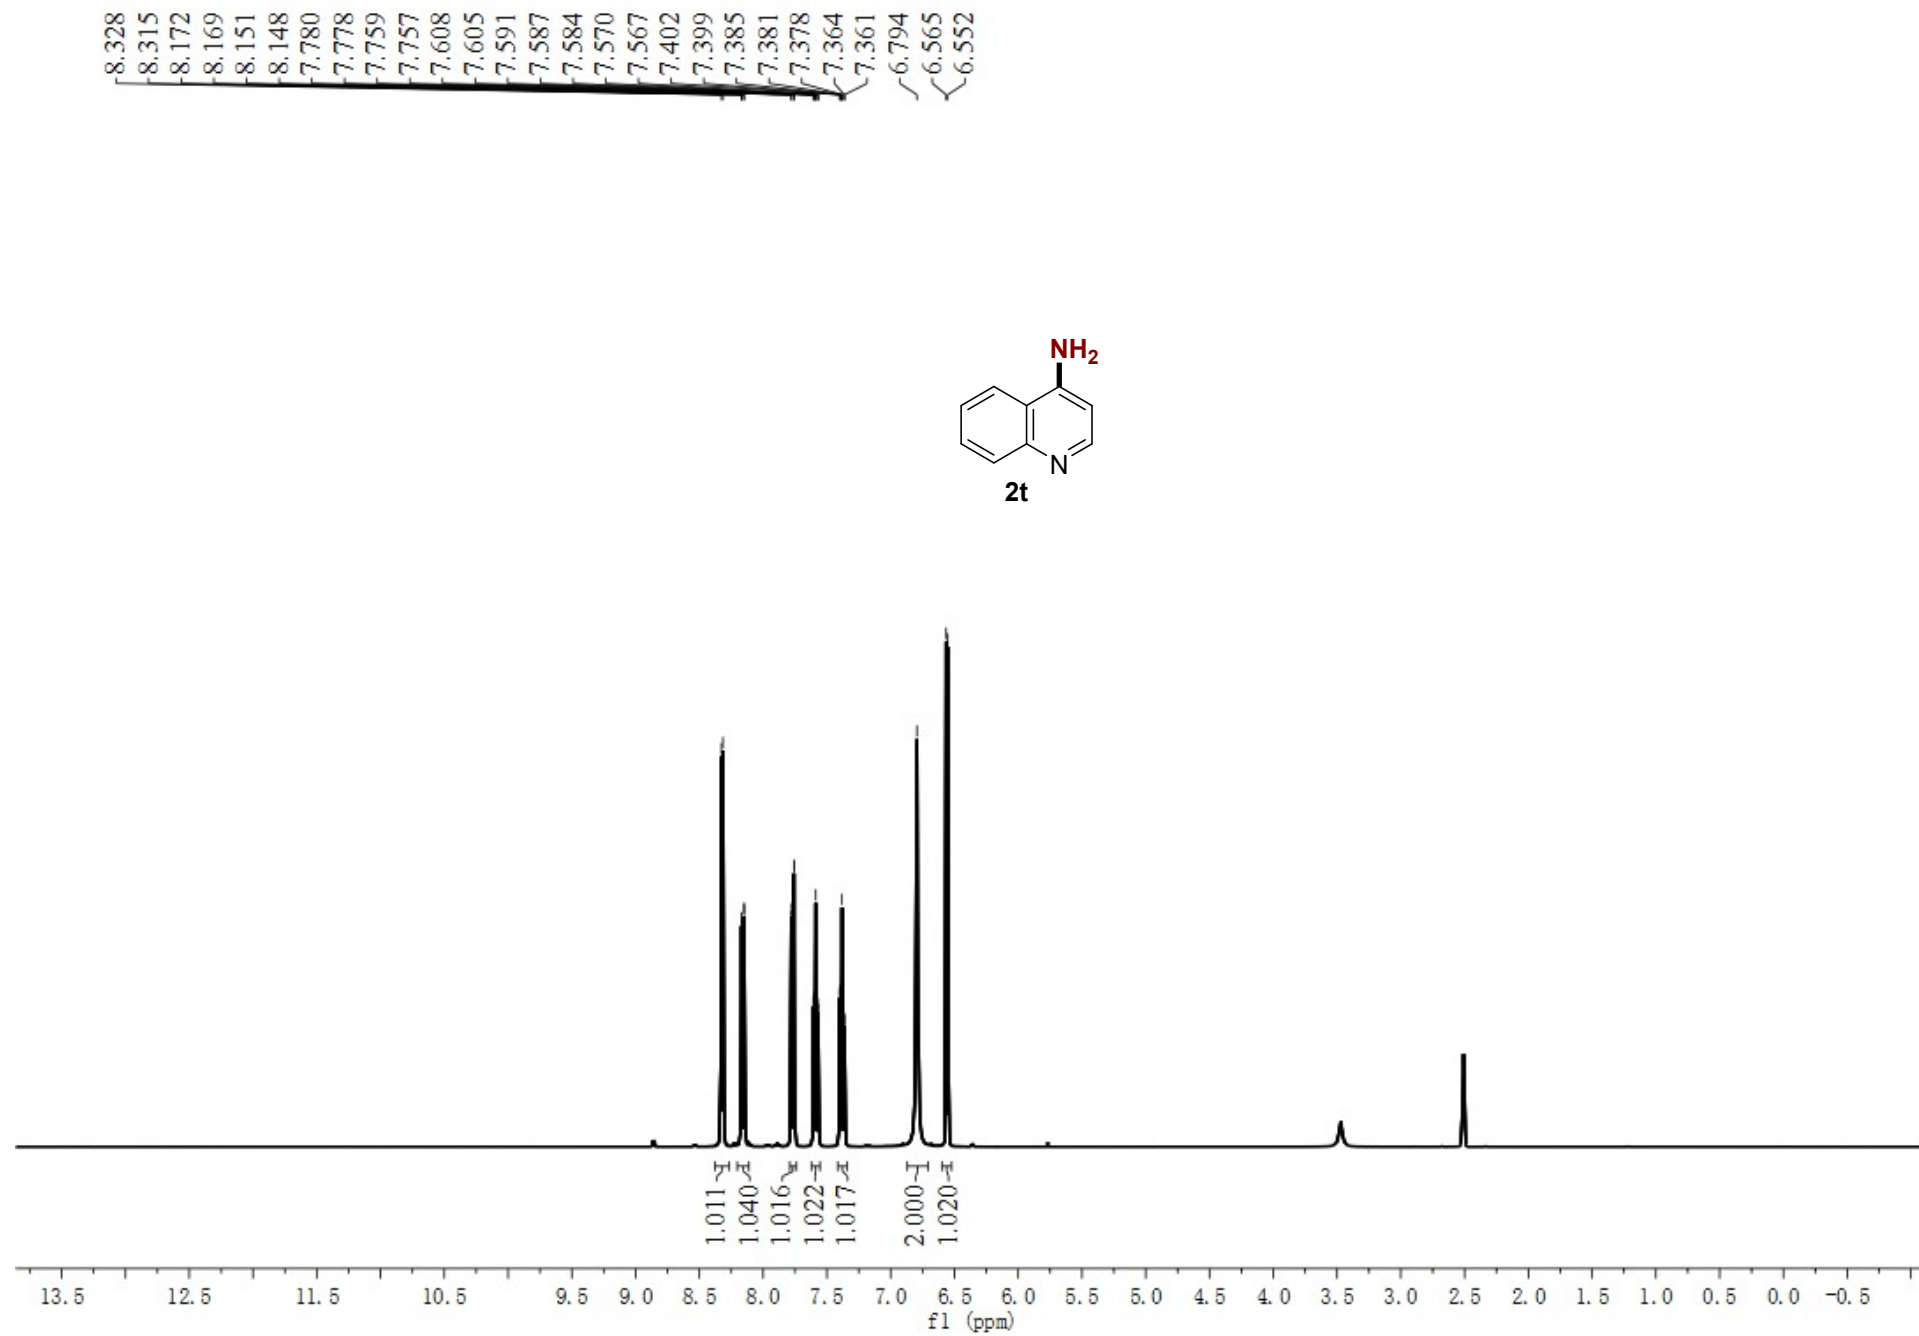

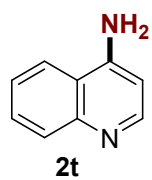

151.915  
 150.816  
 149.258  
 129.350  
 129.282  
 123.932  
 122.793  
 119.068  
 102.747

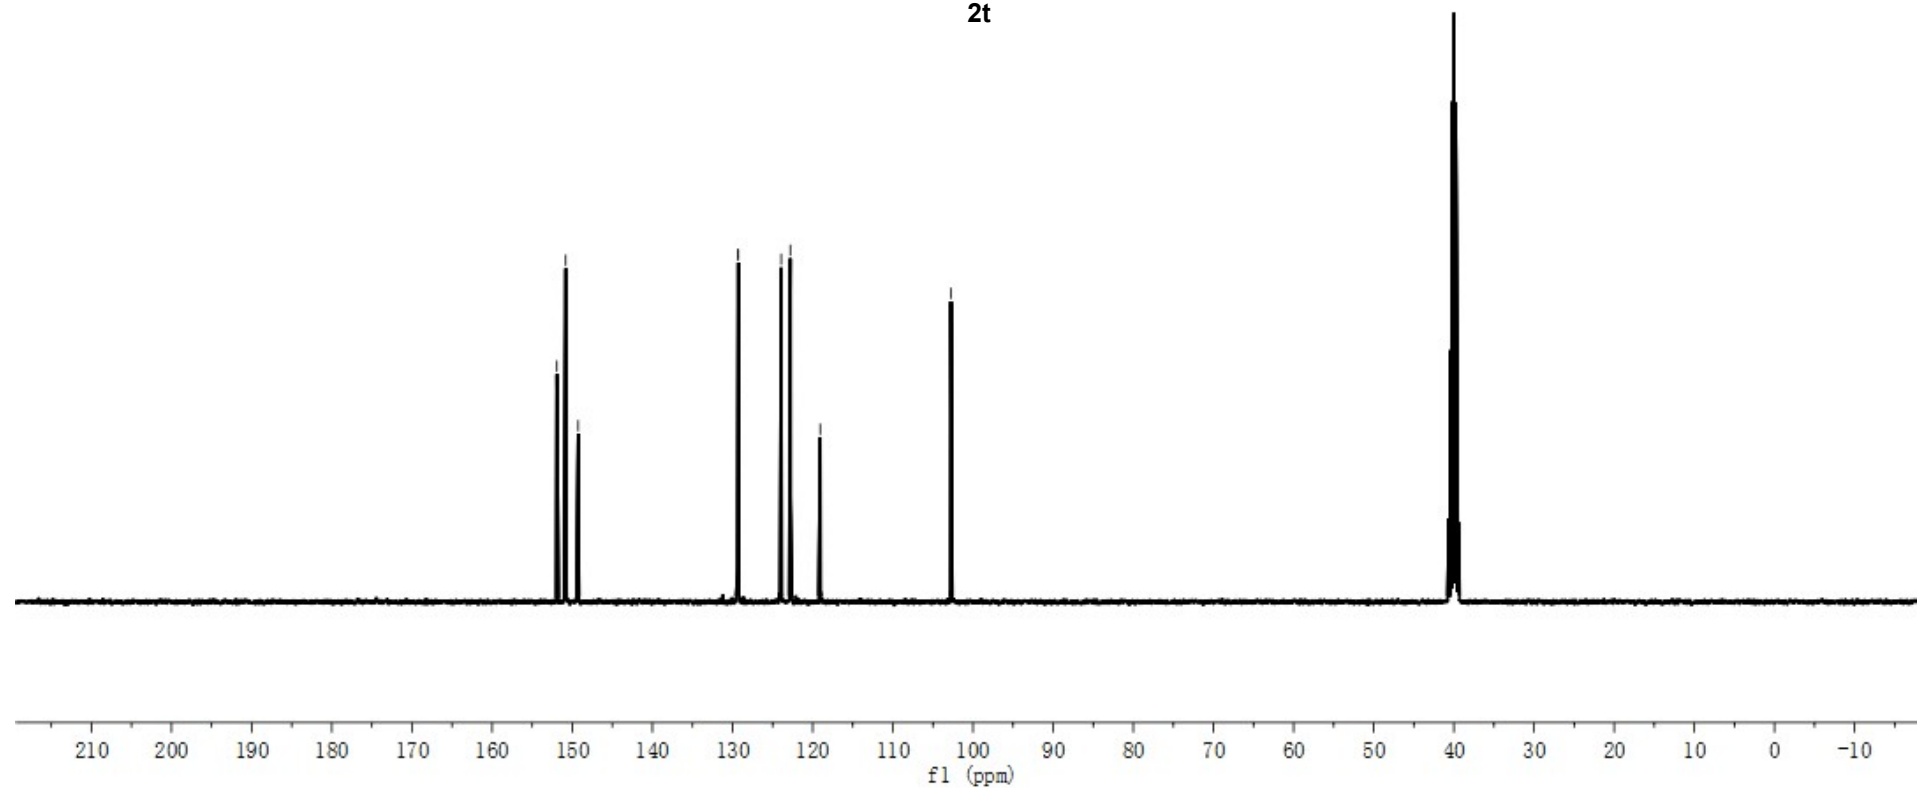

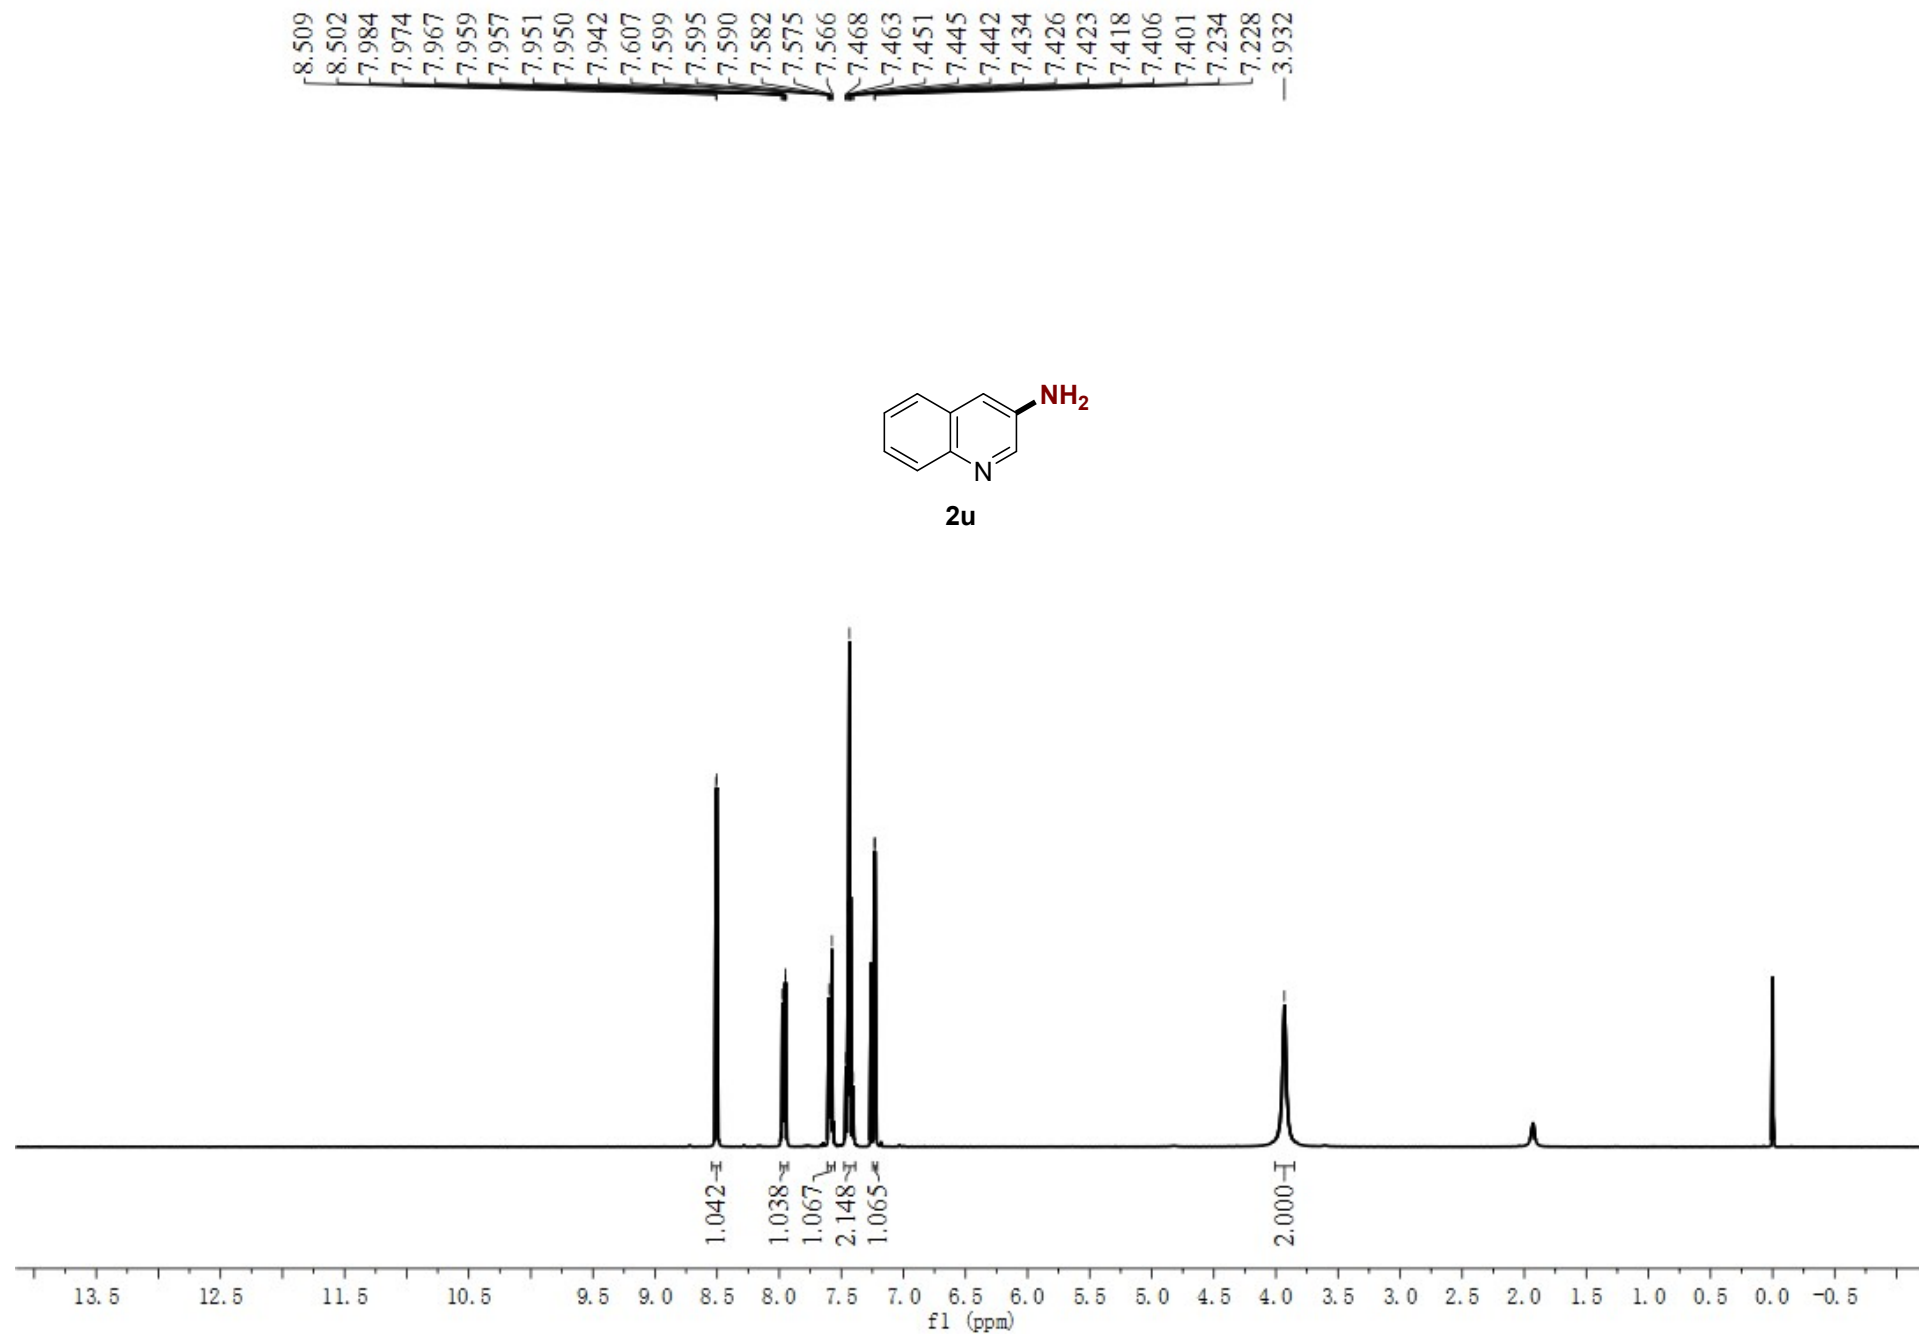

143.118  
142.750  
139.661  
129.072  
126.922  
125.824  
124.939

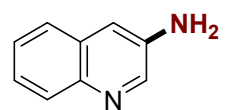

2u

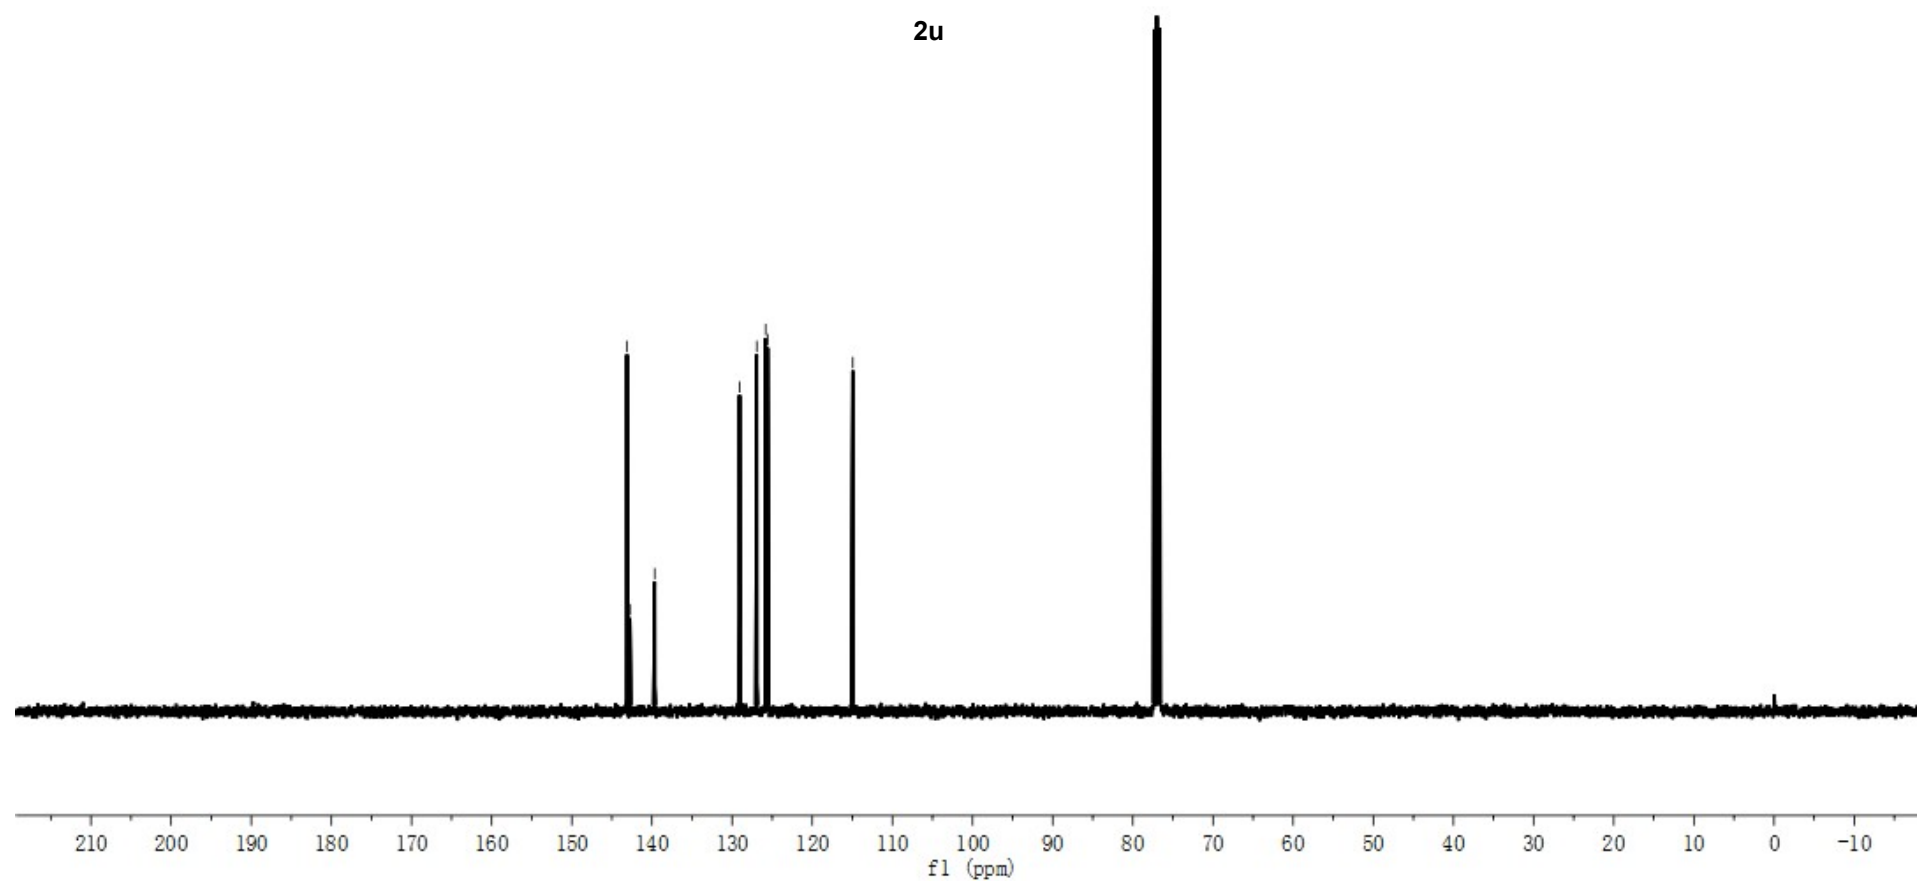

7.962  
7.959  
7.950  
7.947

6.446  
6.442  
6.434  
6.430  
5.950

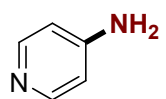

2v

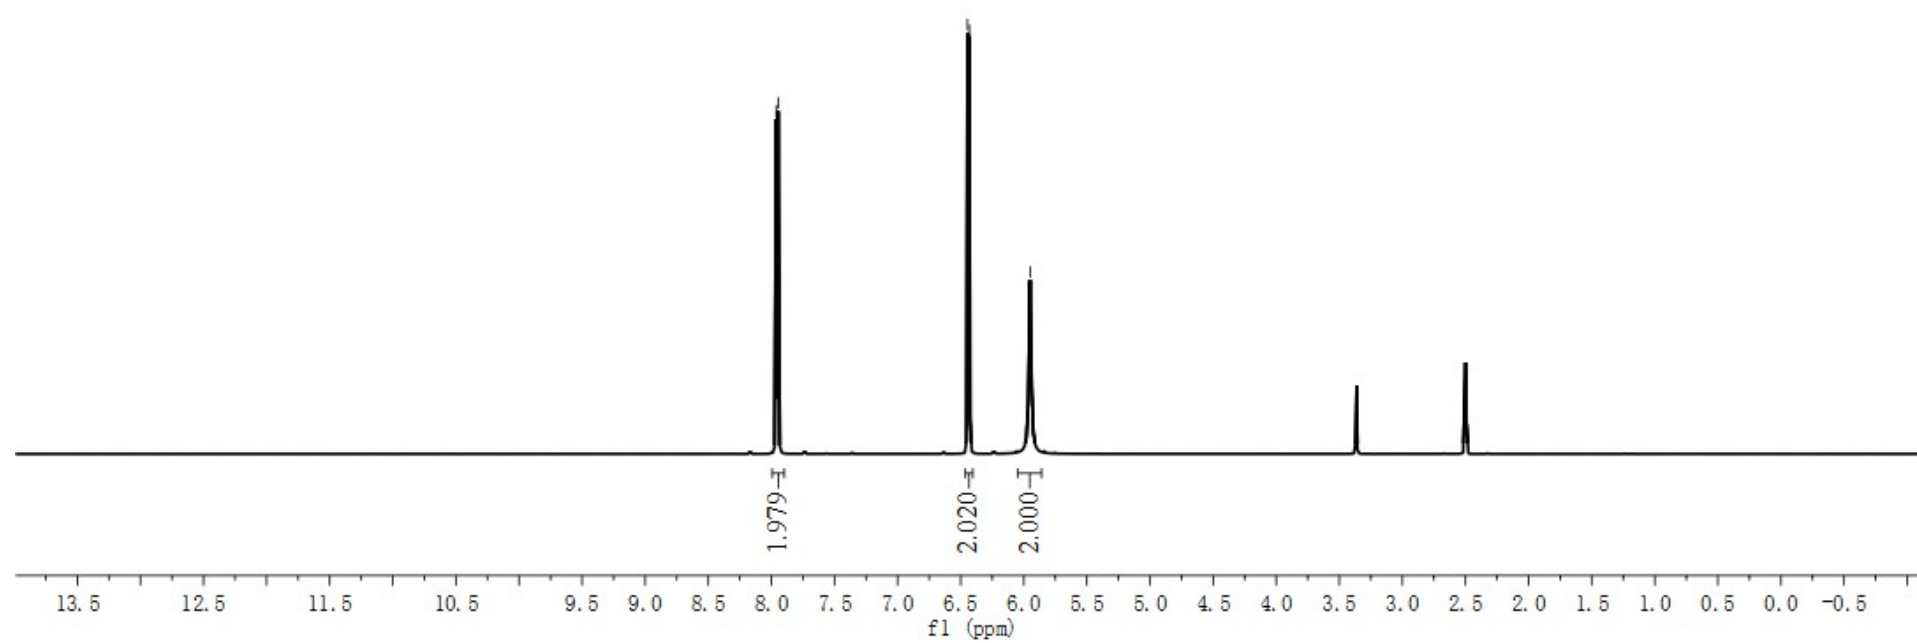

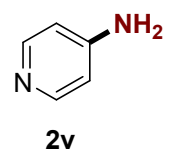

—154,646  
—149,950

—109,293

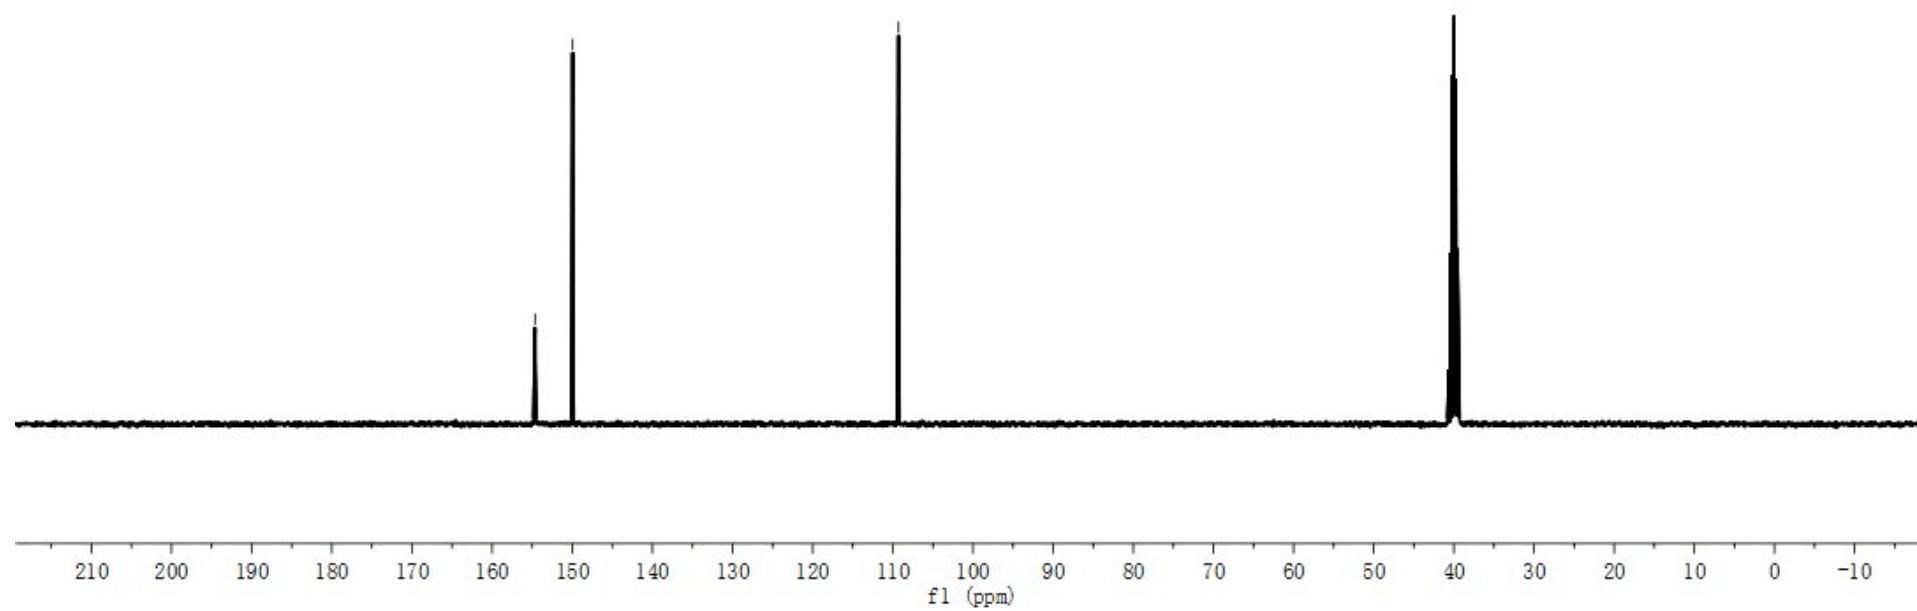

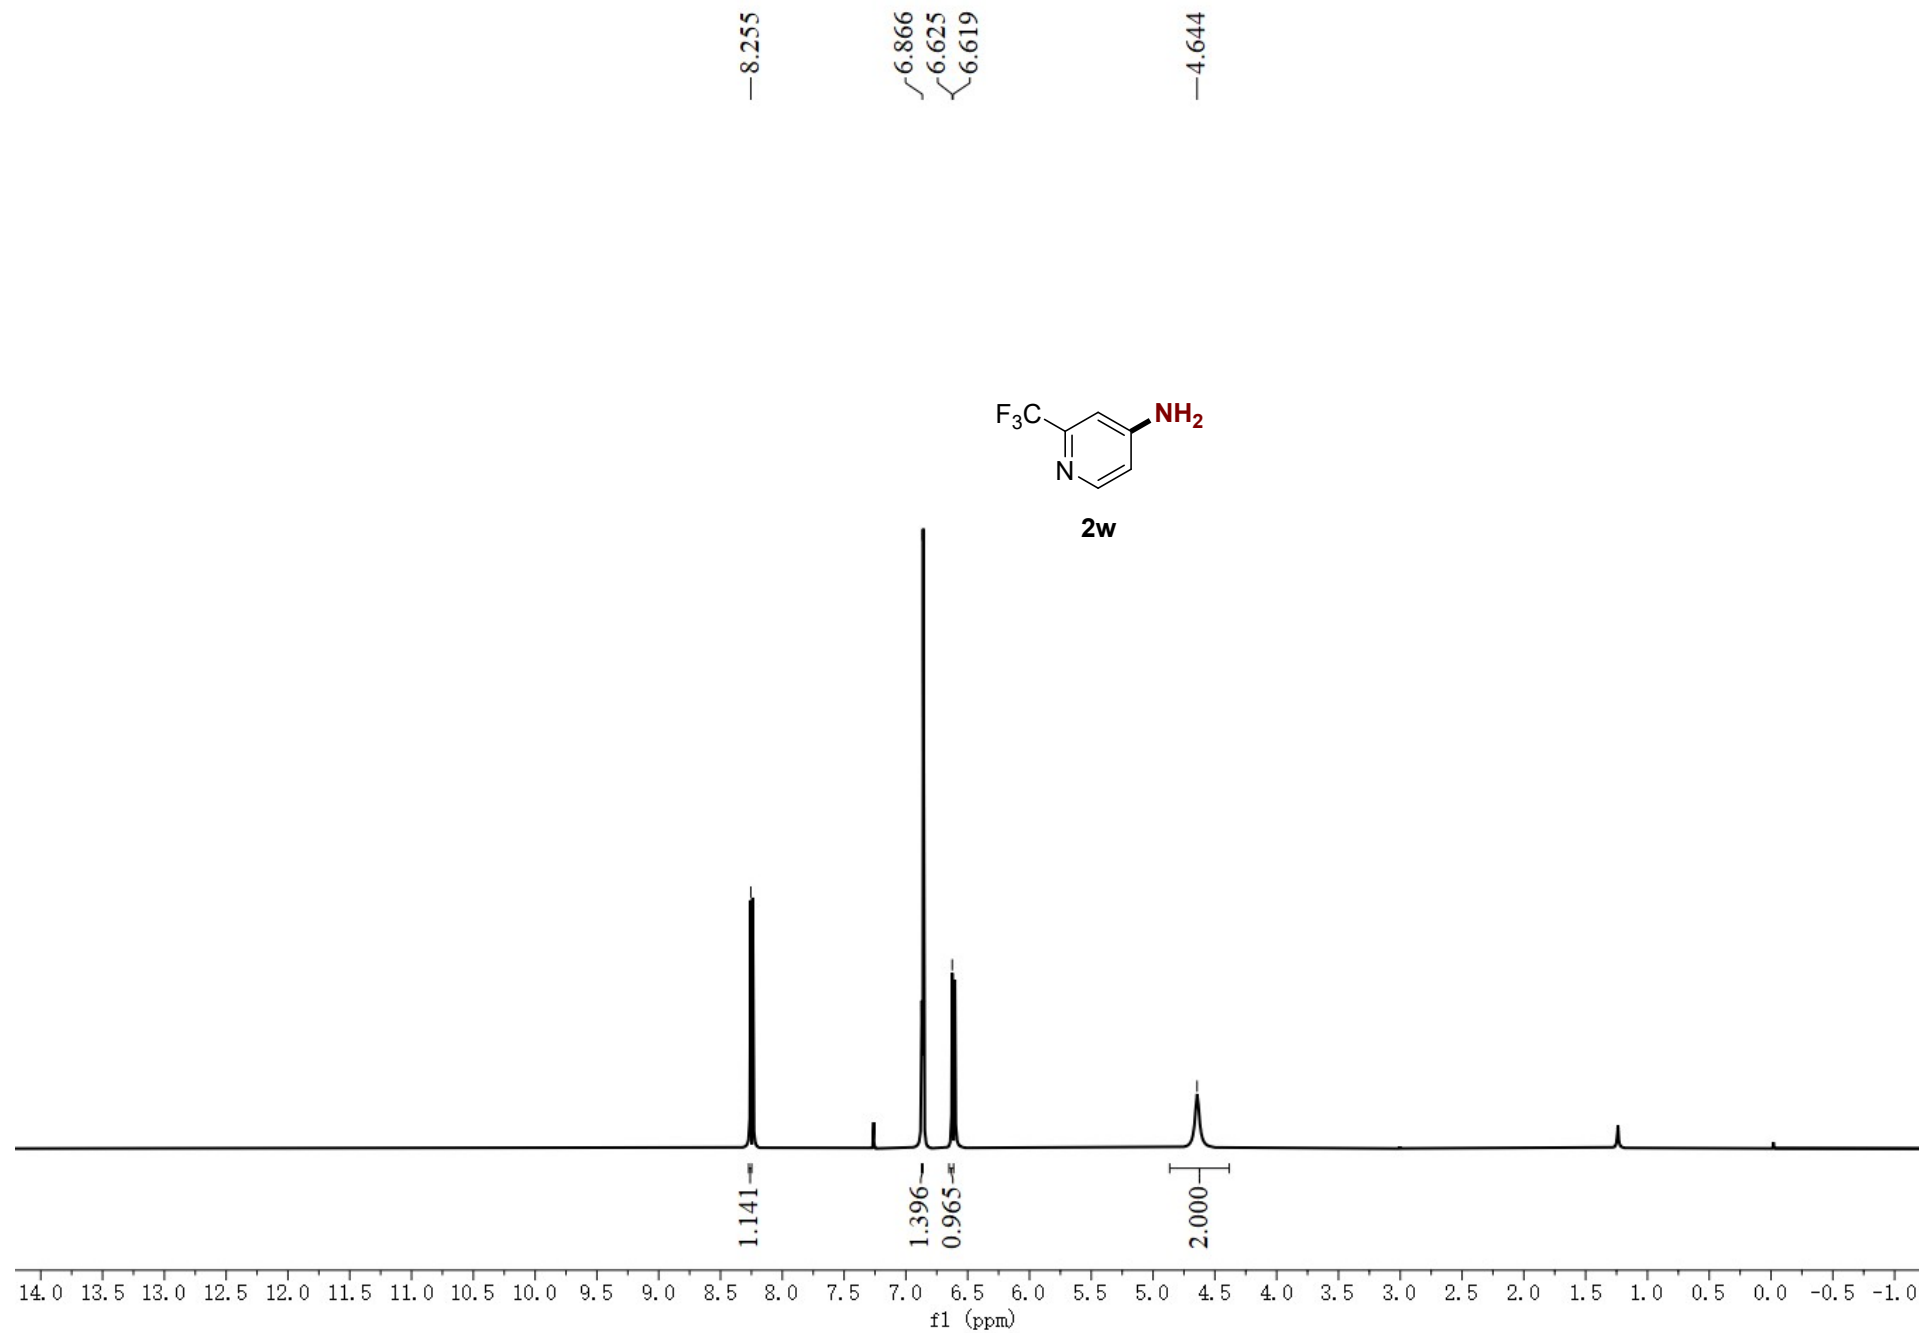

153.927  
150.291  
149.434  
149.098  
148.763  
148.430  
125.792  
123.068  
120.342  
117.618  
111.126  
106.287  
106.257  
106.225  
106.193

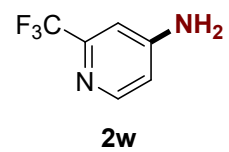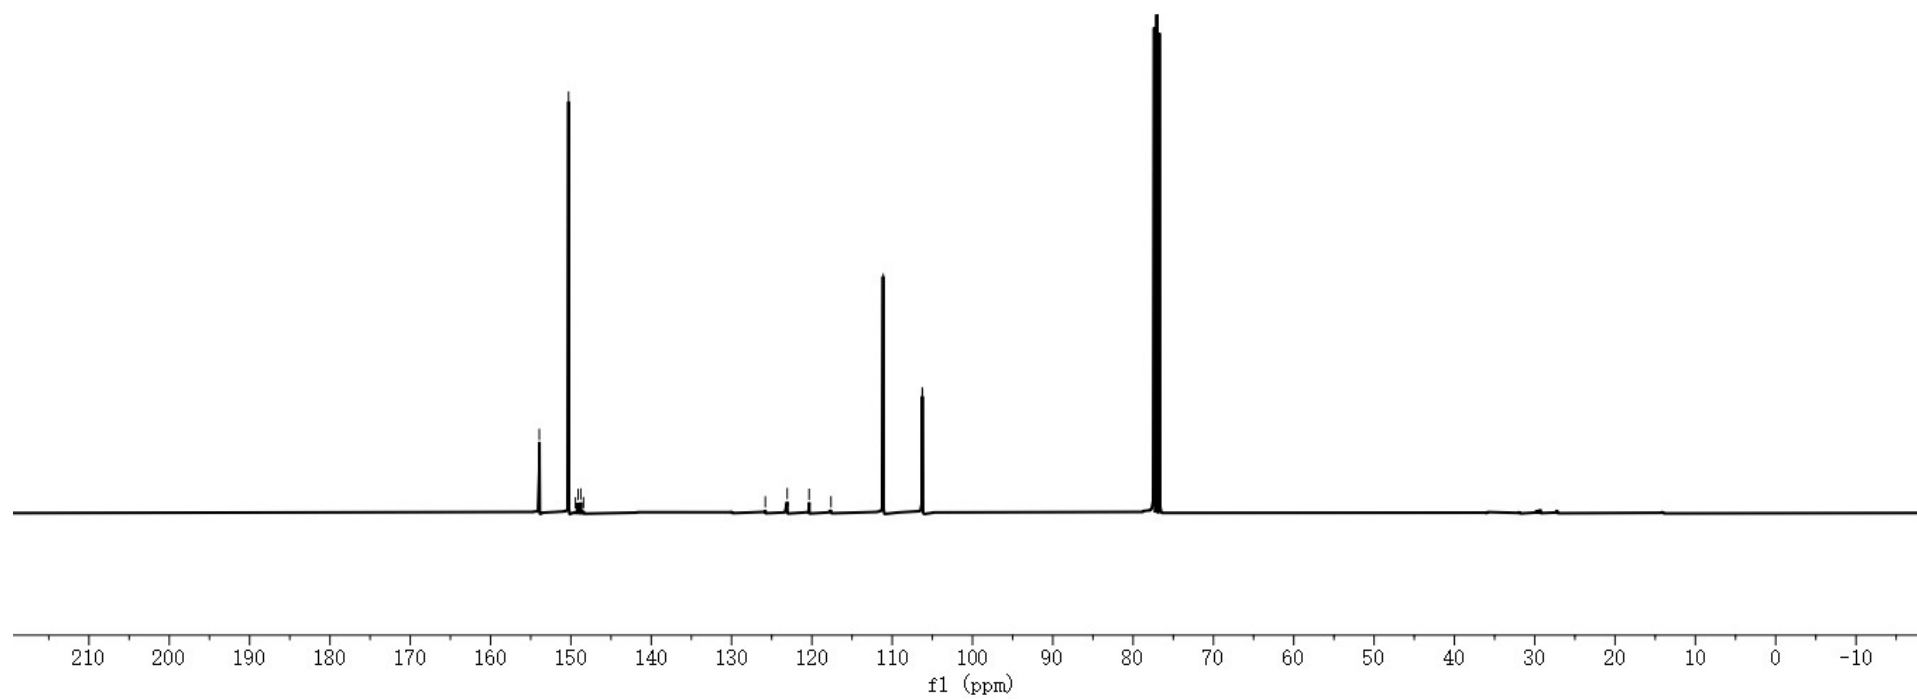

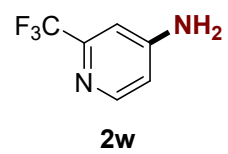

—68.533

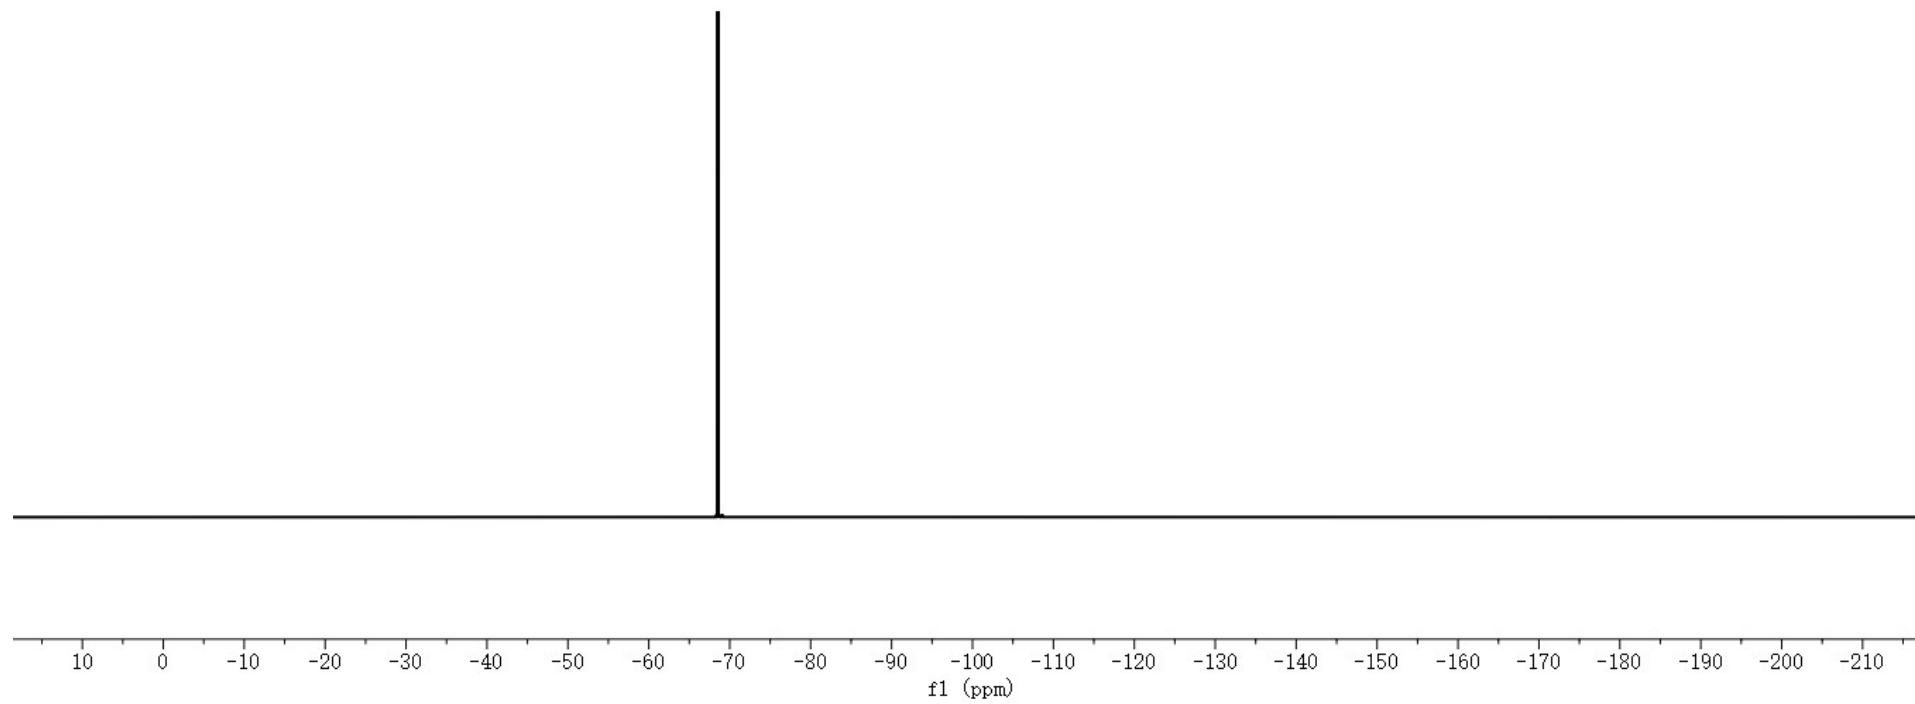

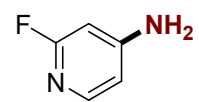

2x

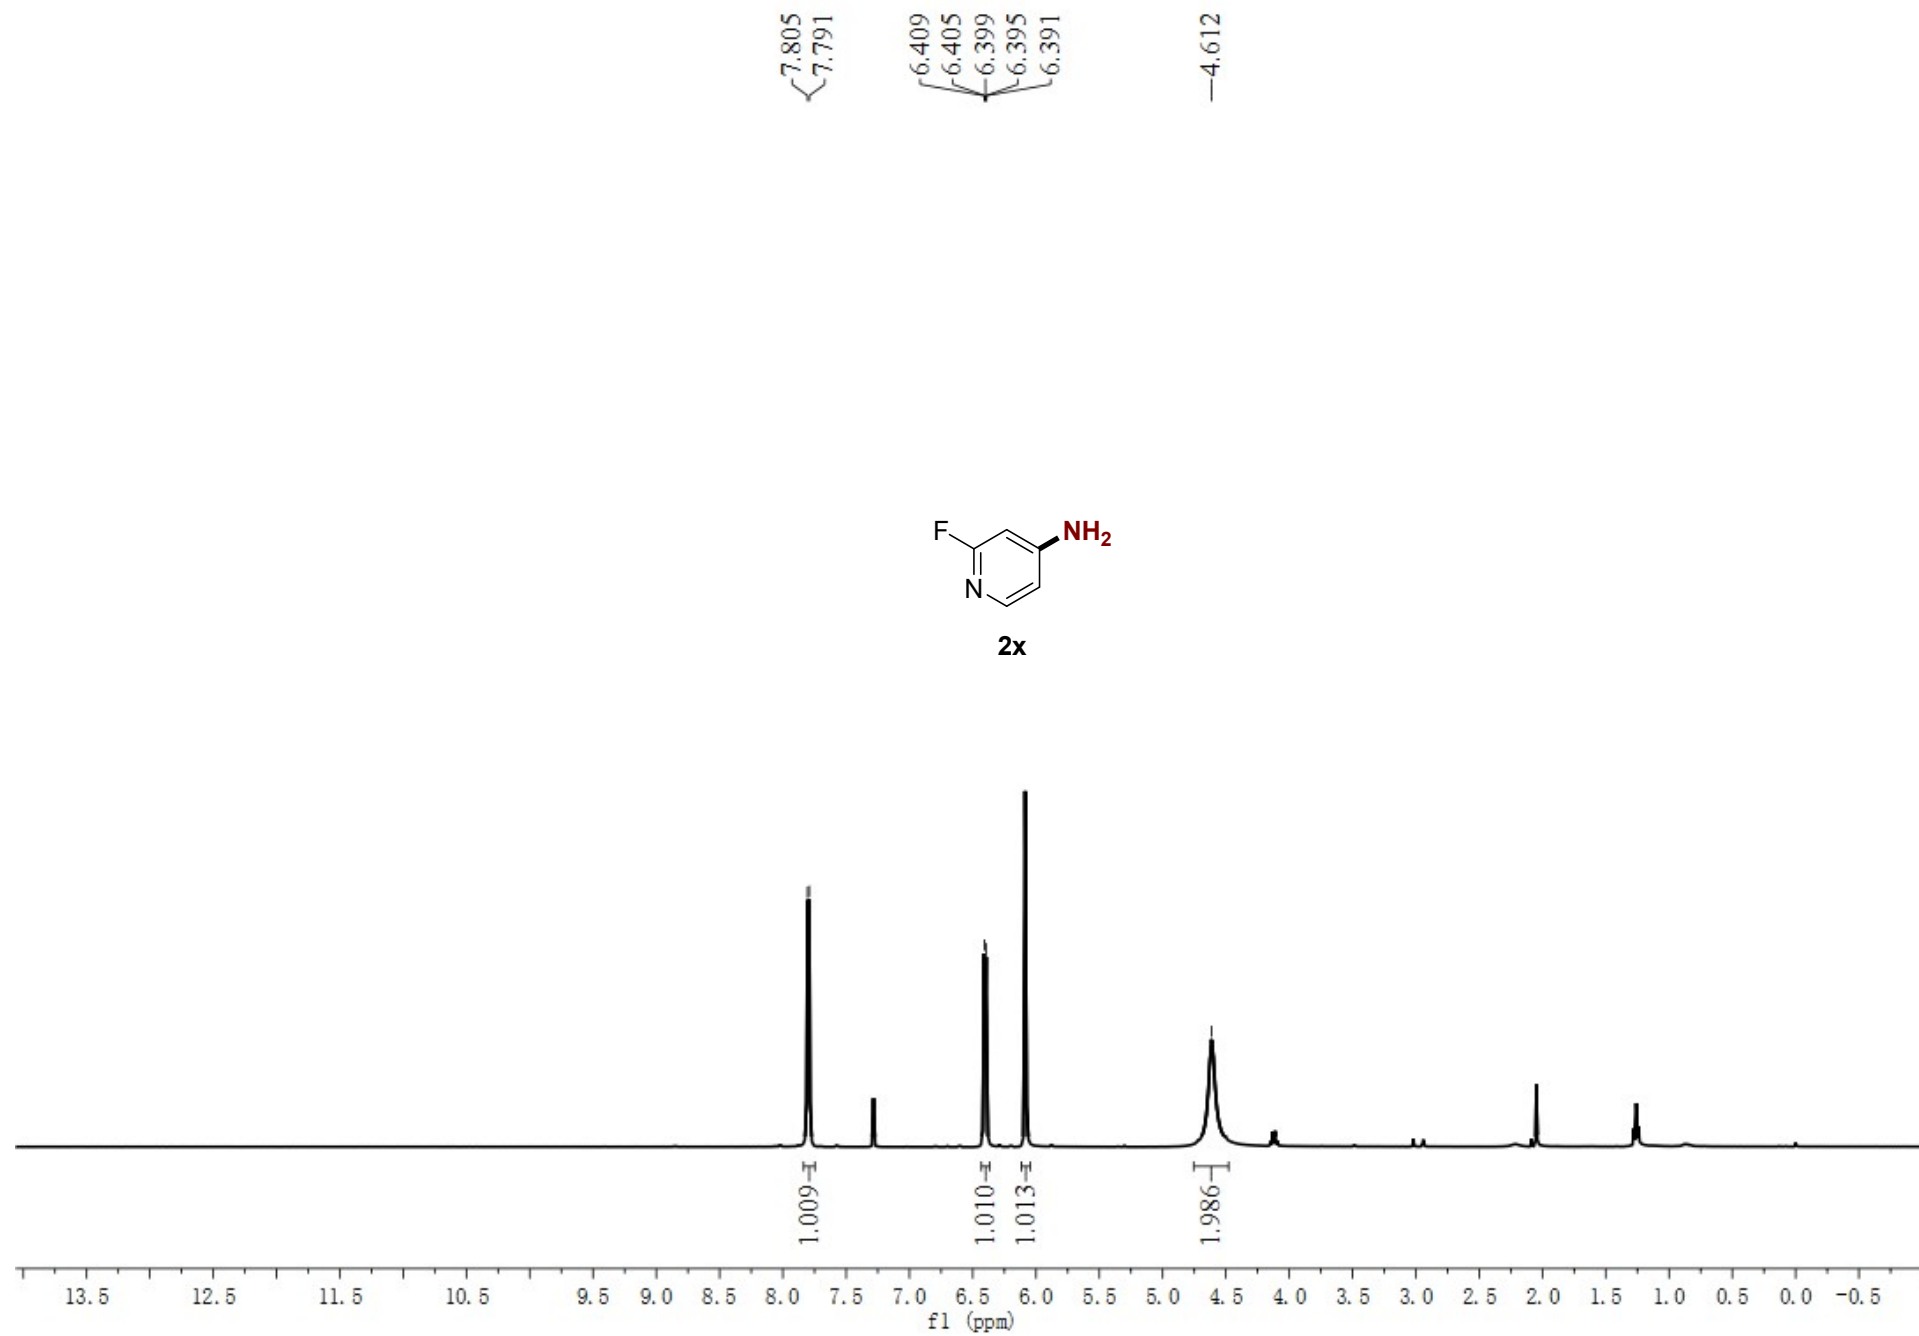

166.589  
164.281  
157.263  
157.147  
147.593  
147.408

108.222  
108.194

92.990  
92.574

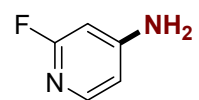

2x

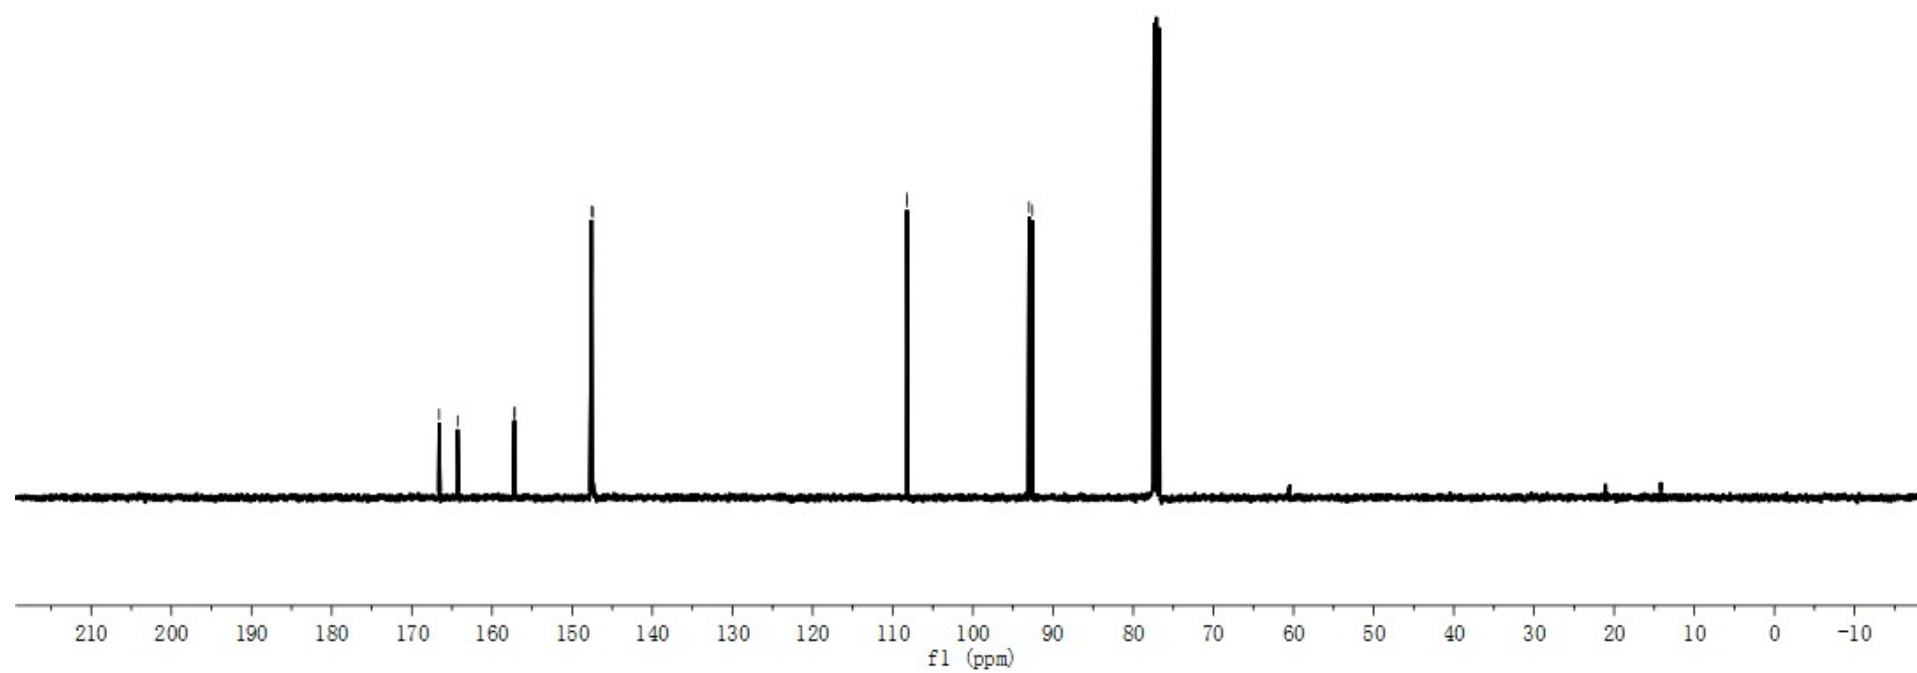

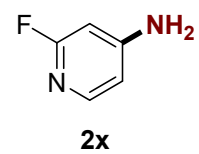

—69.927

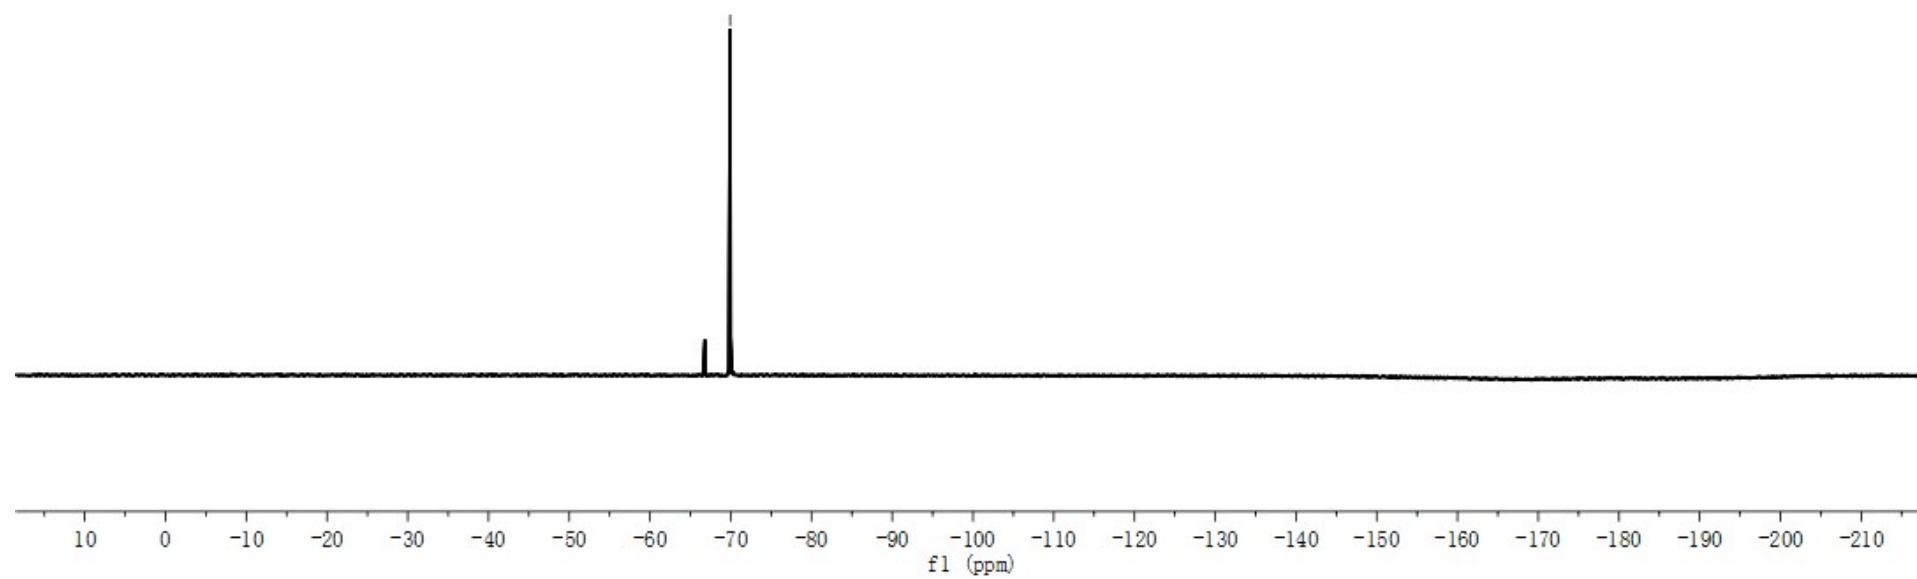

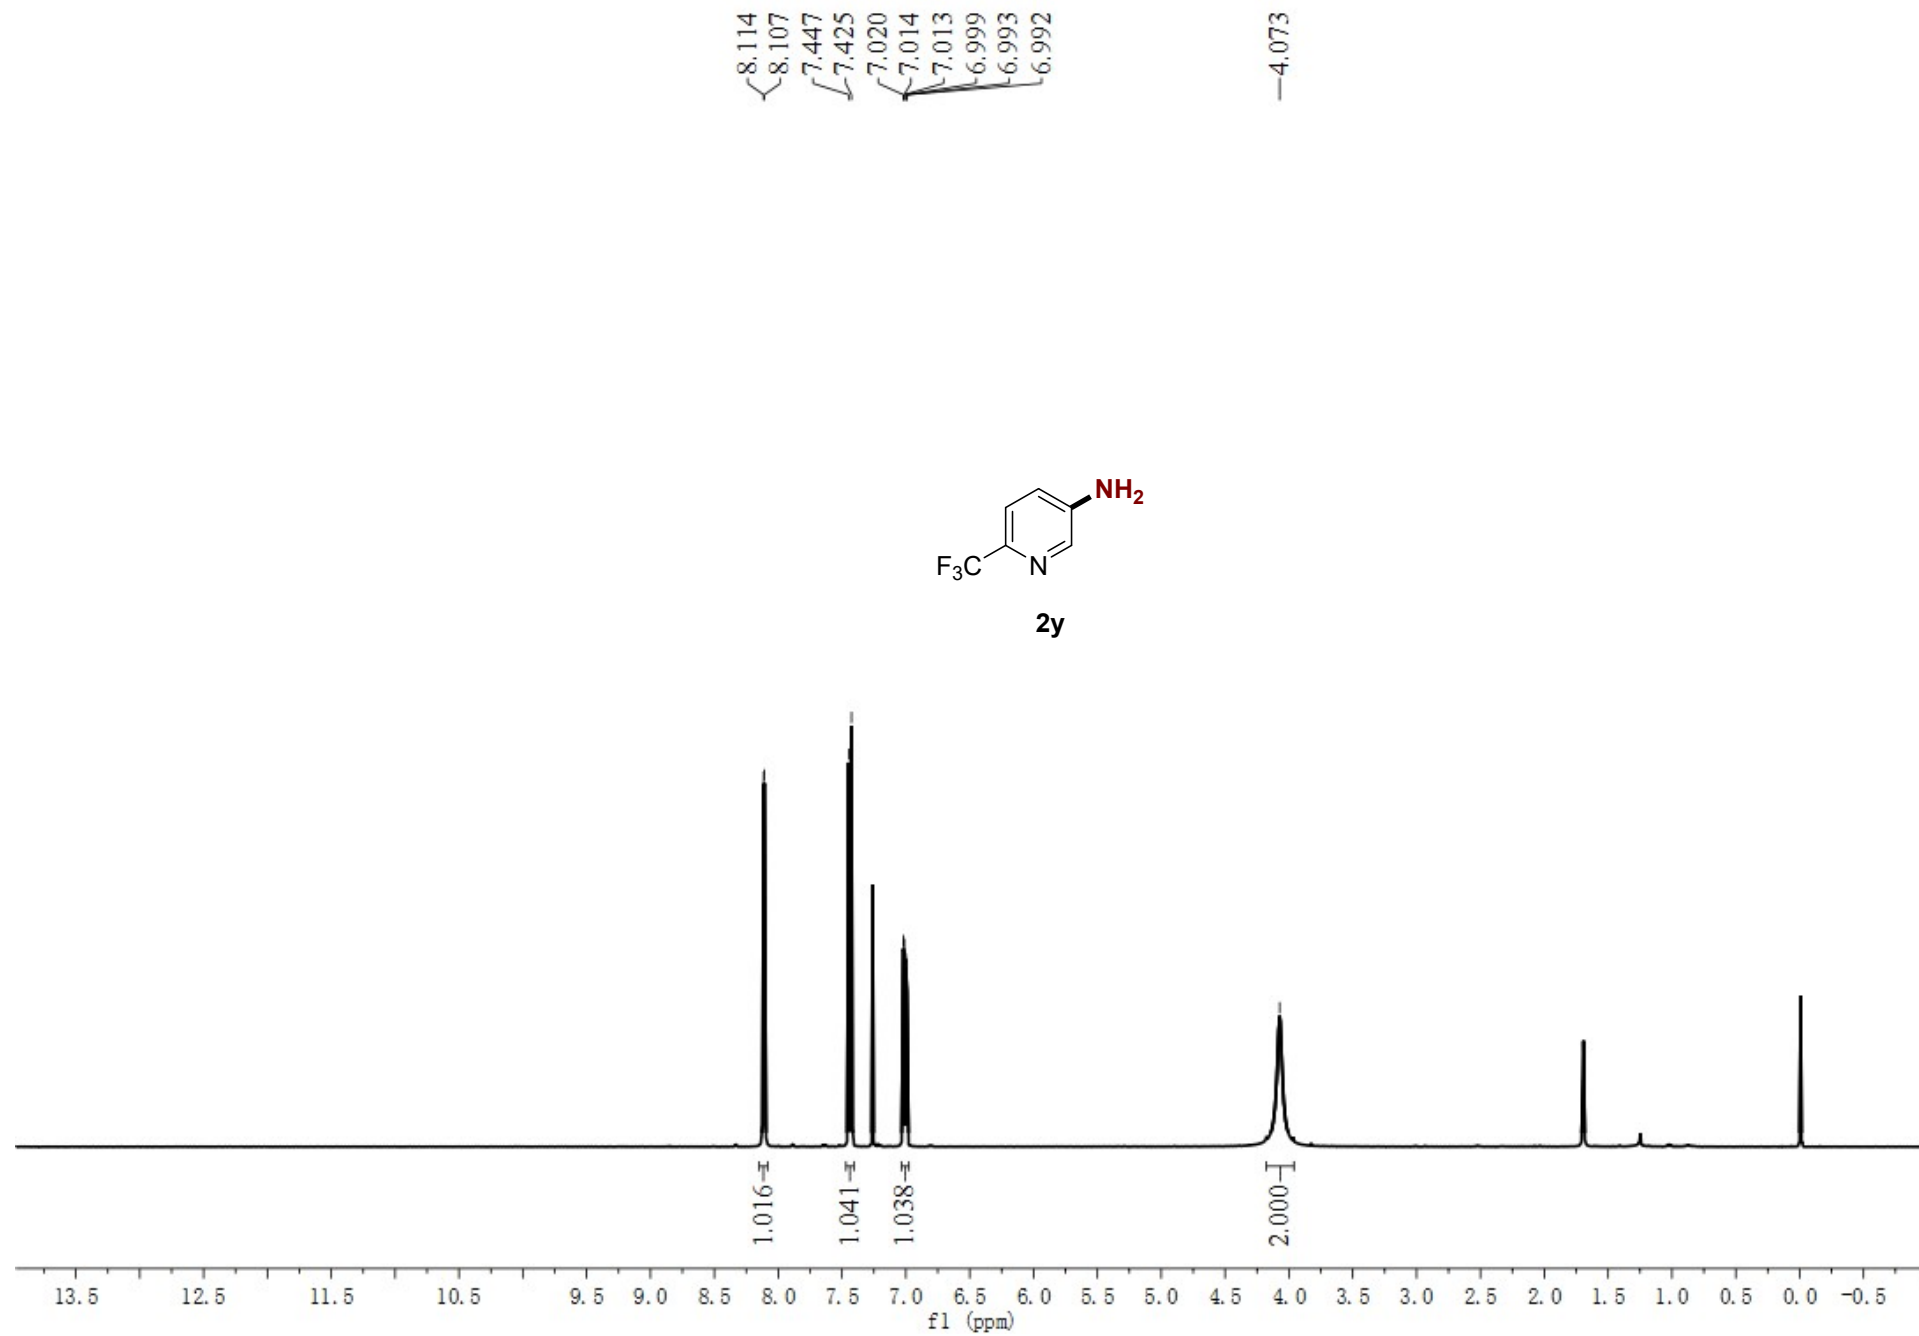

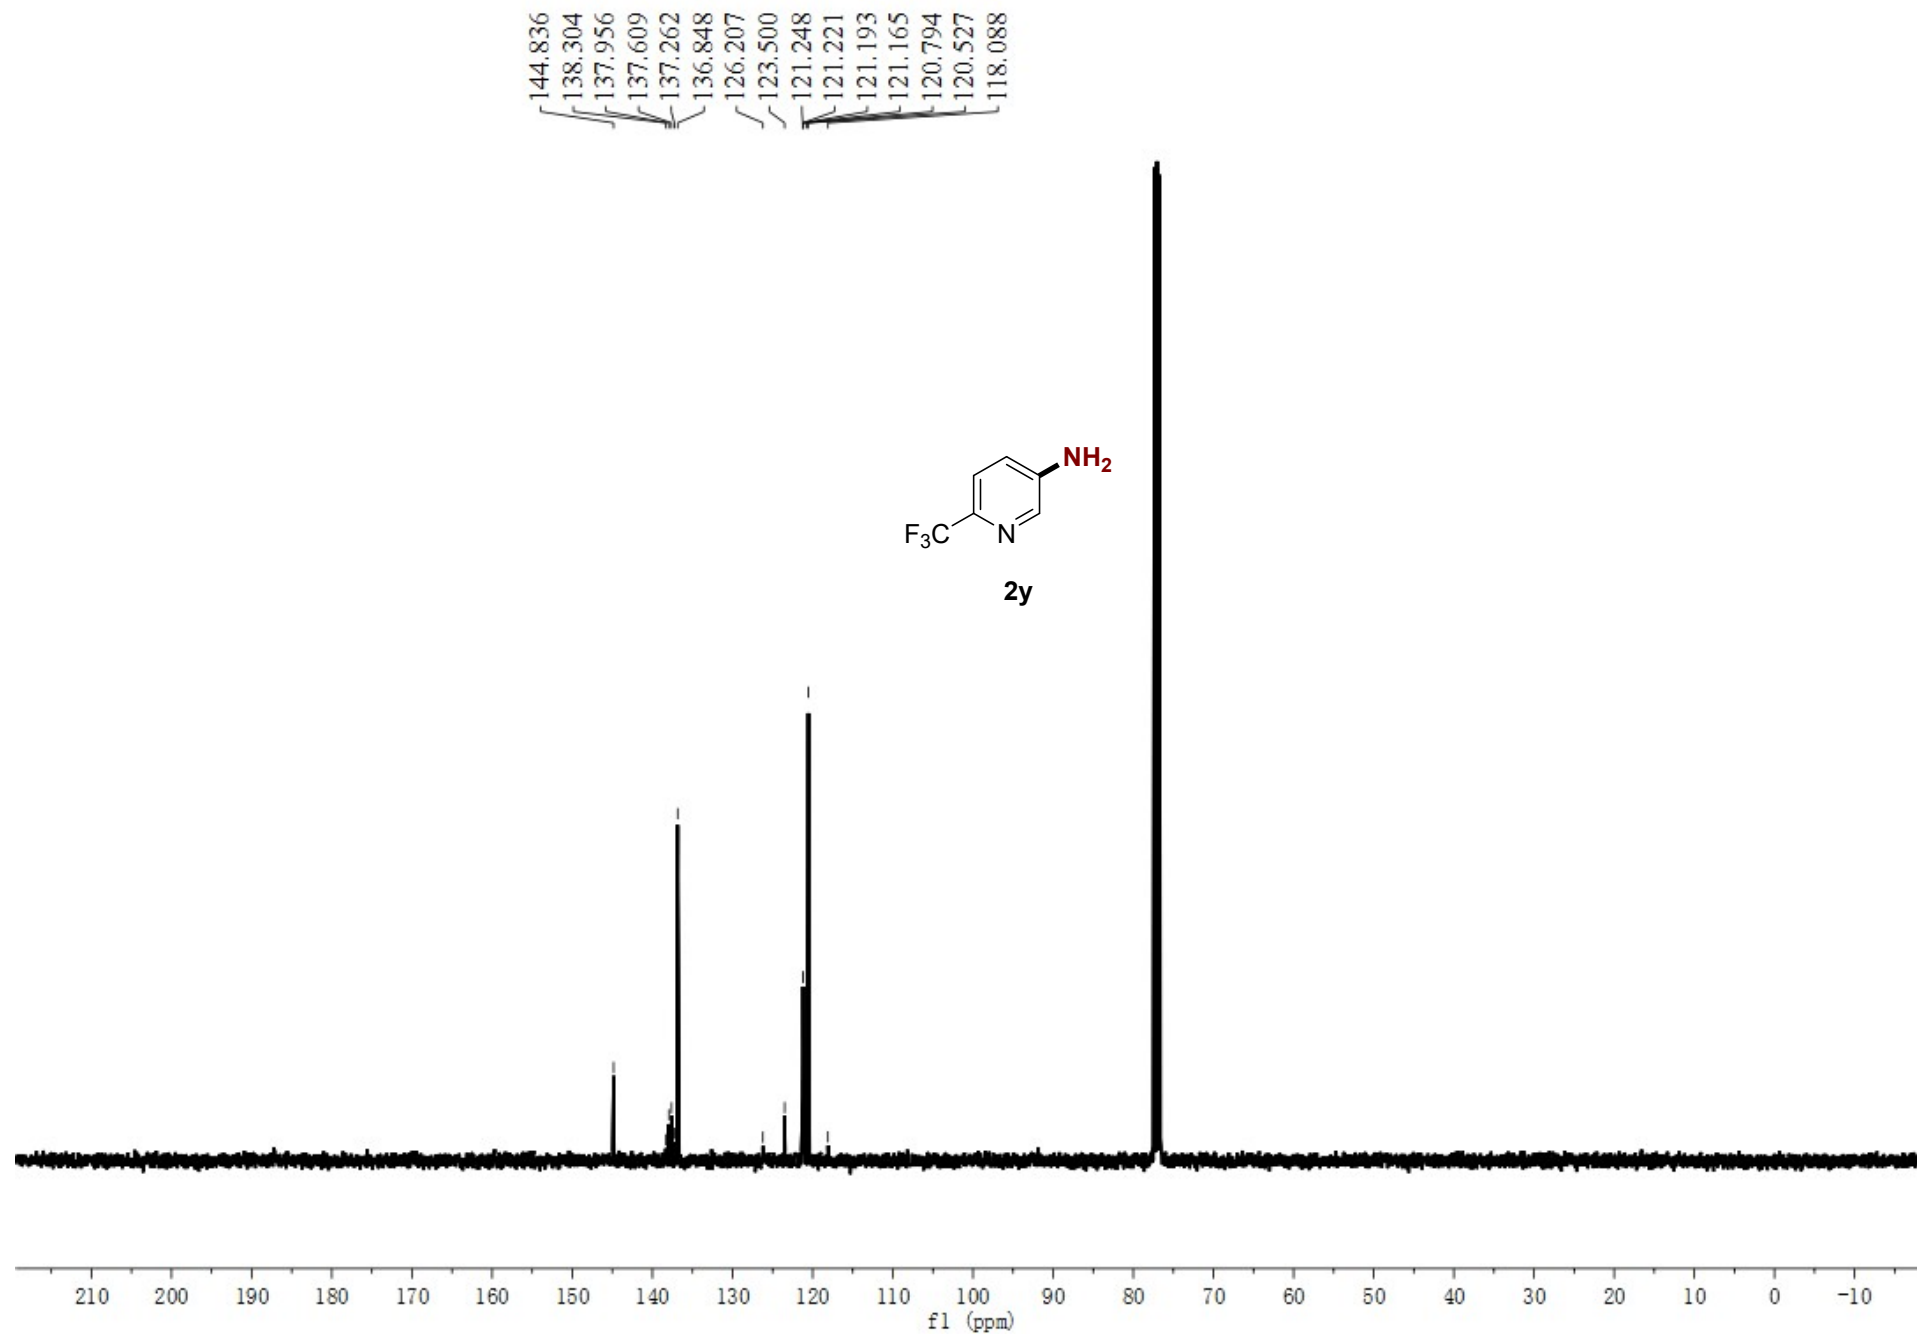

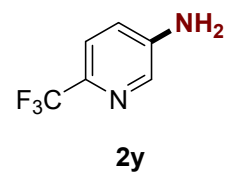

— -66.627

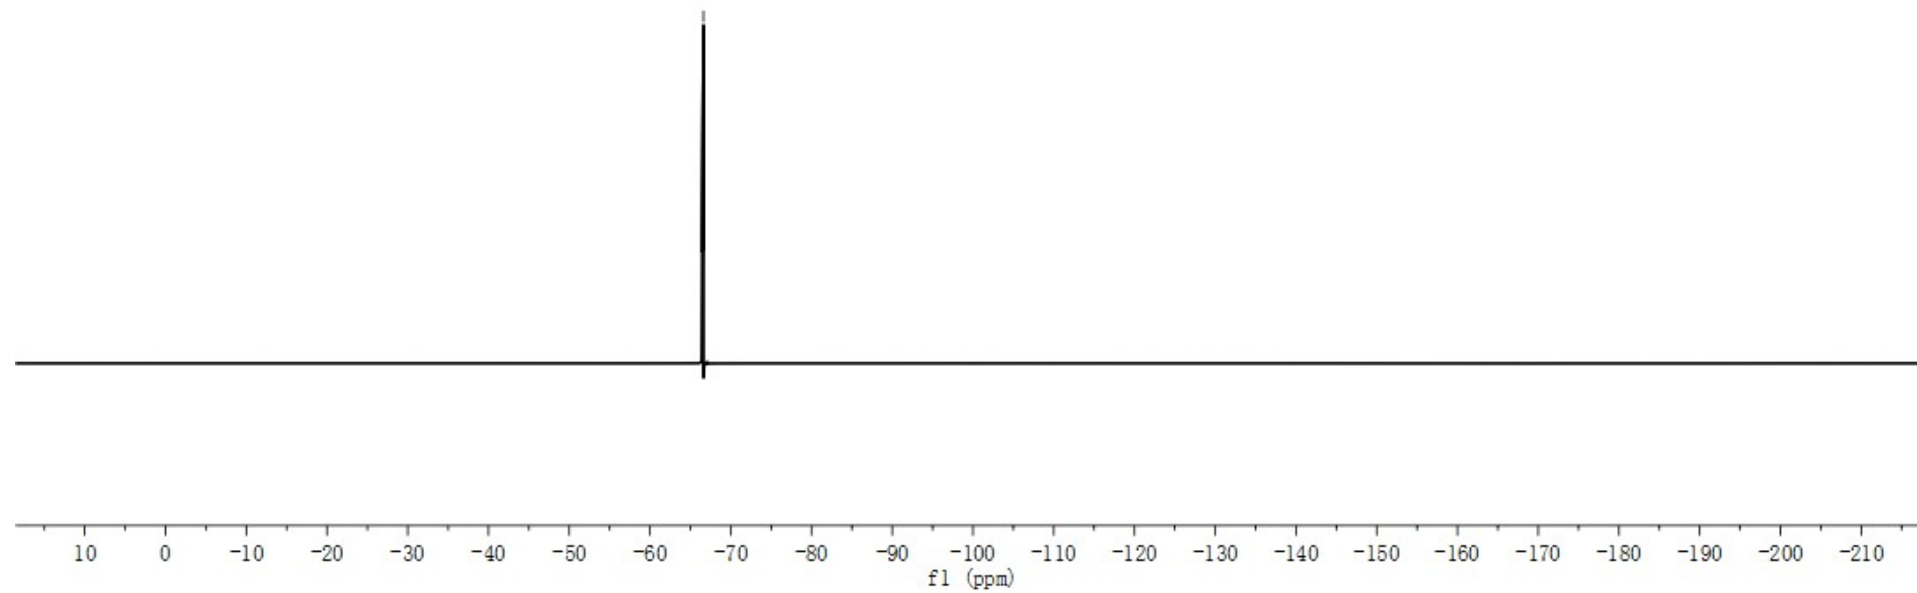

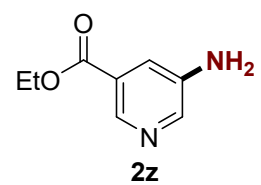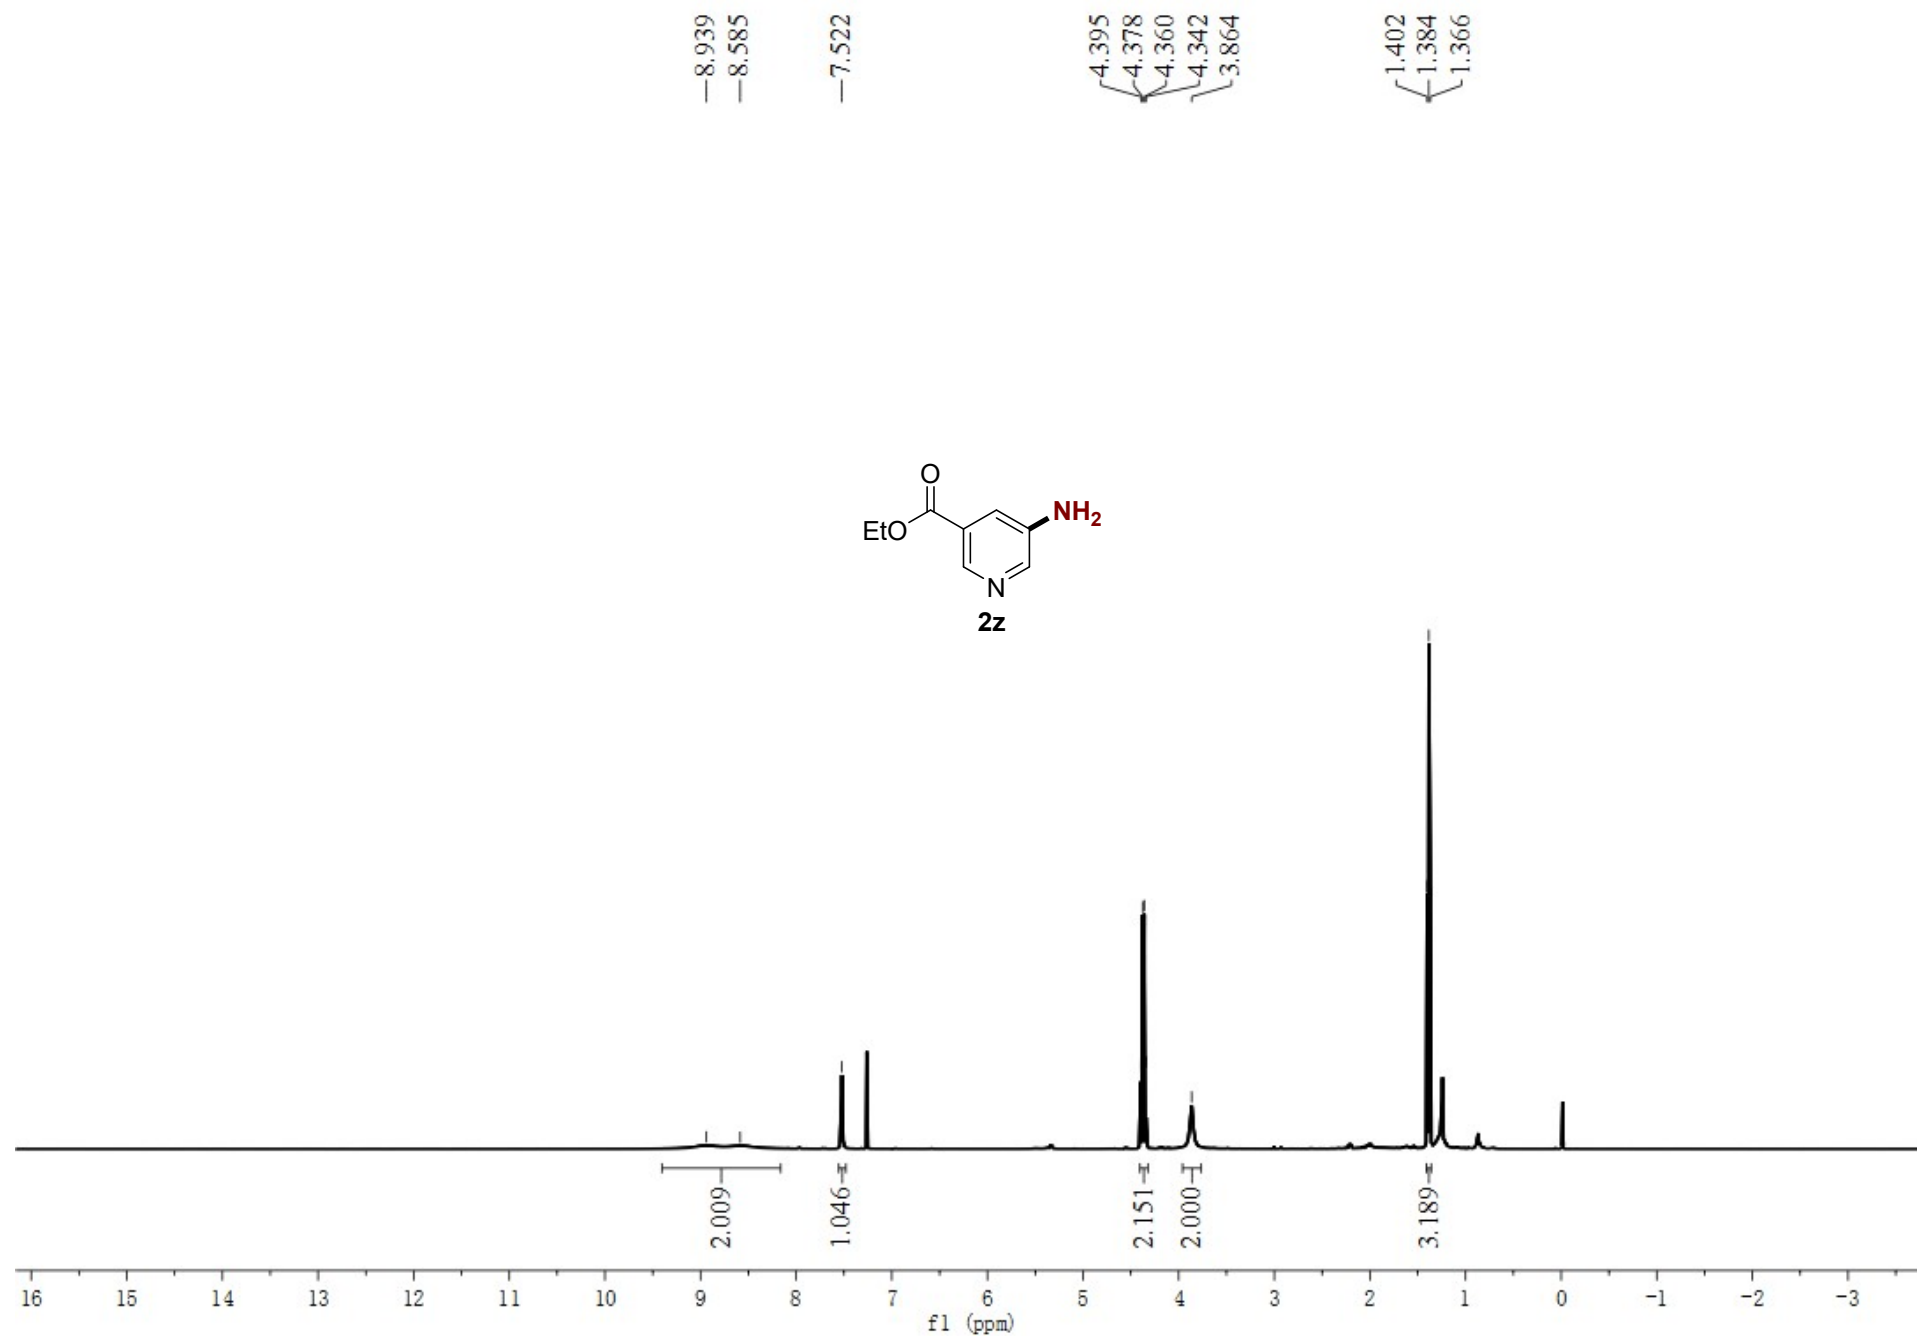

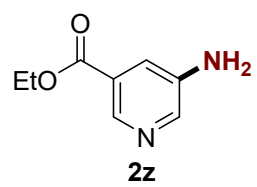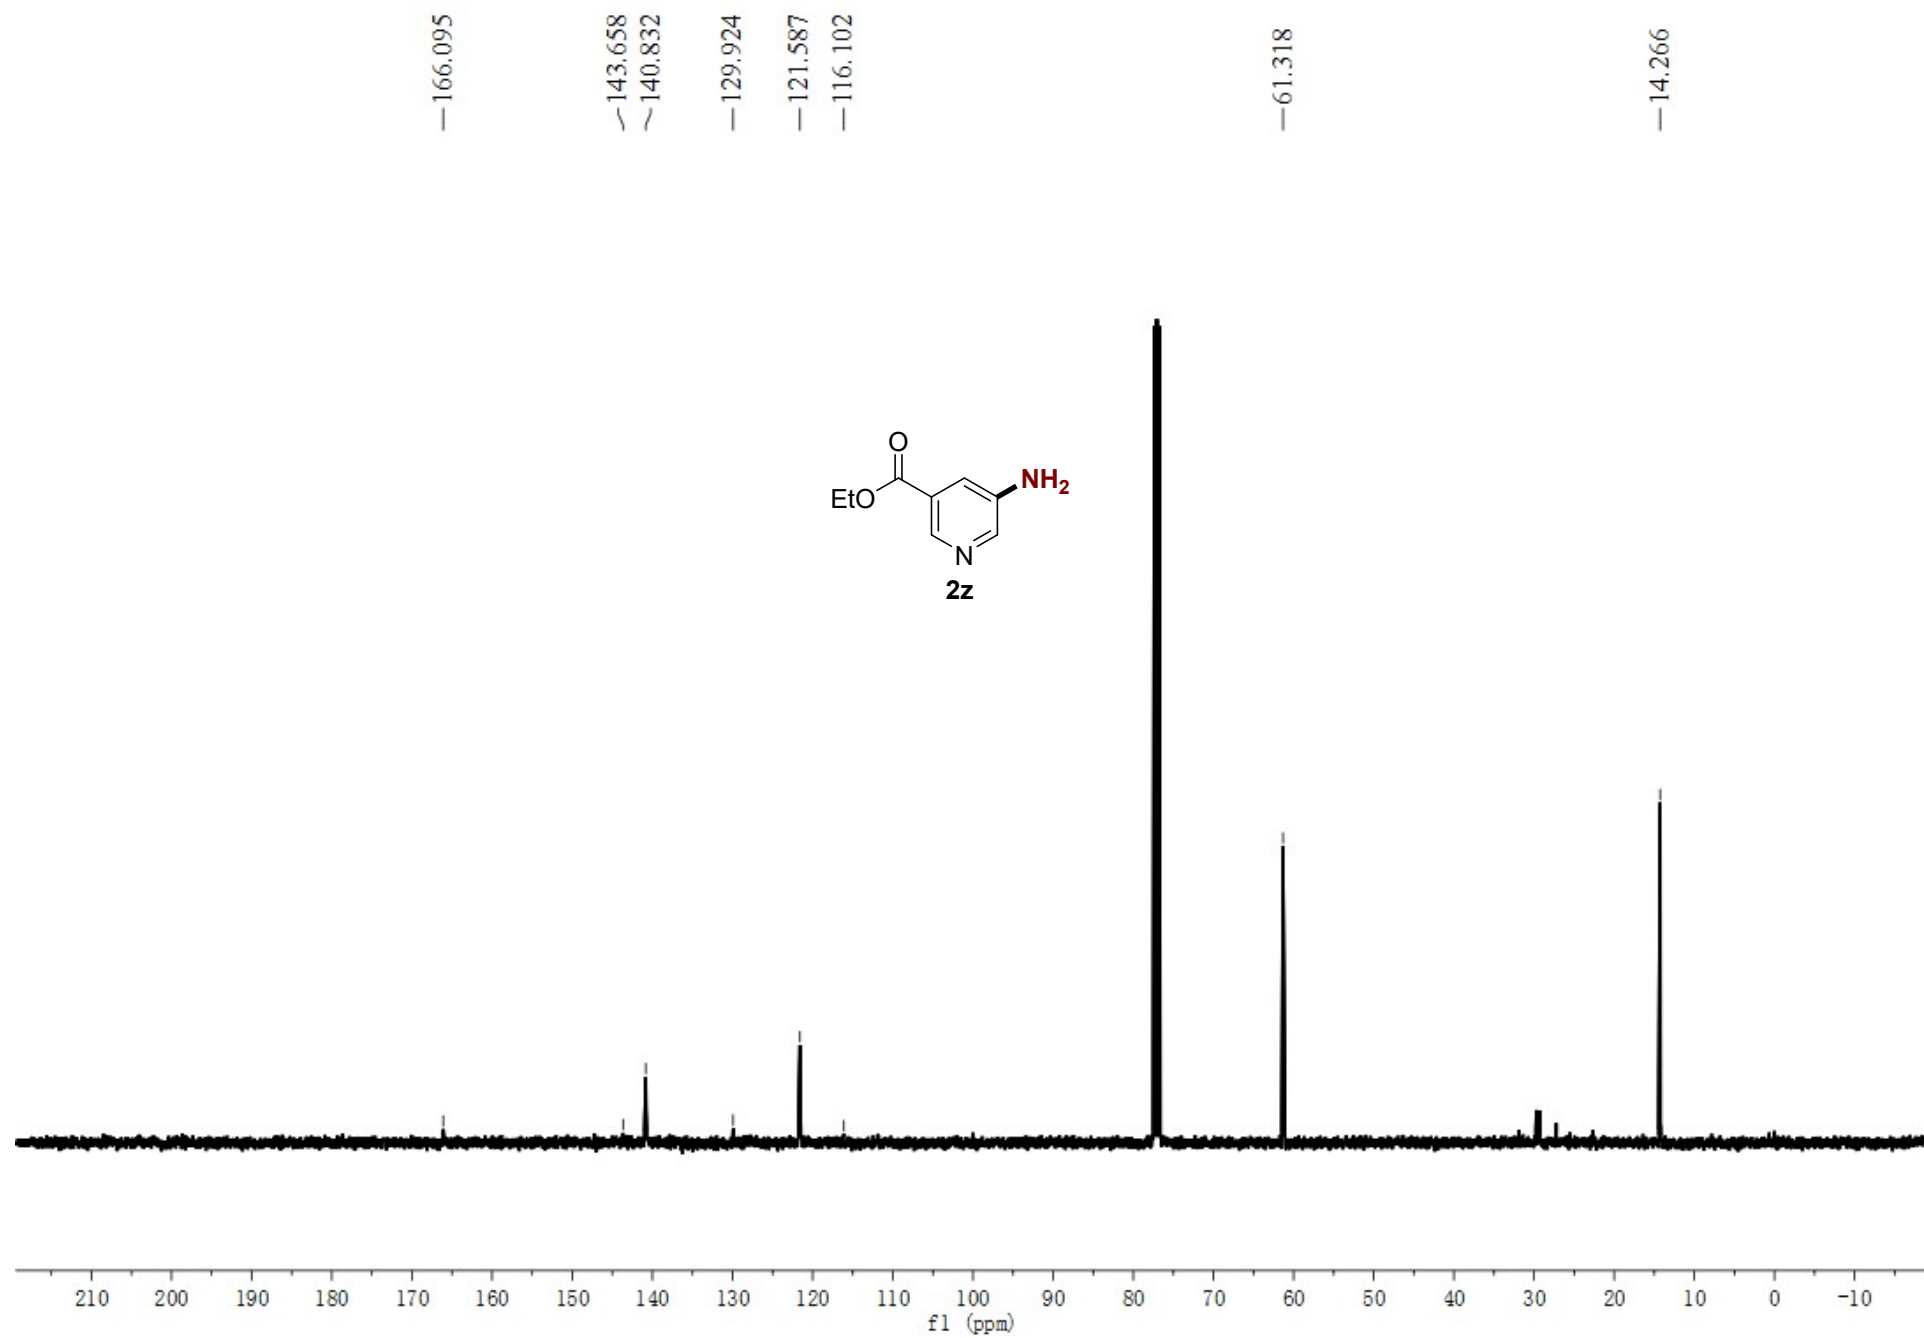

8.266  
8.262  
8.241  
8.234  
7.152  
7.146  
7.140

-3.991

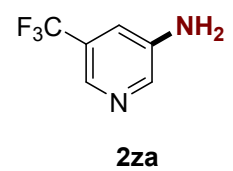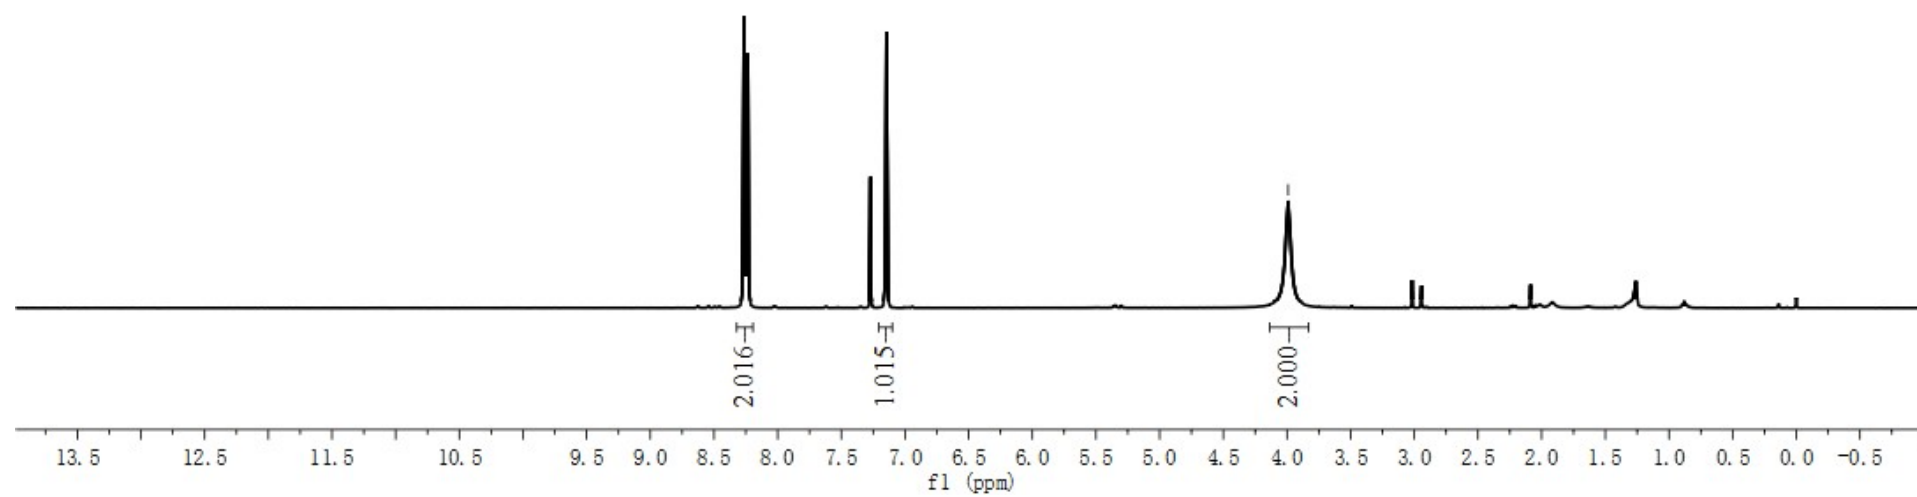

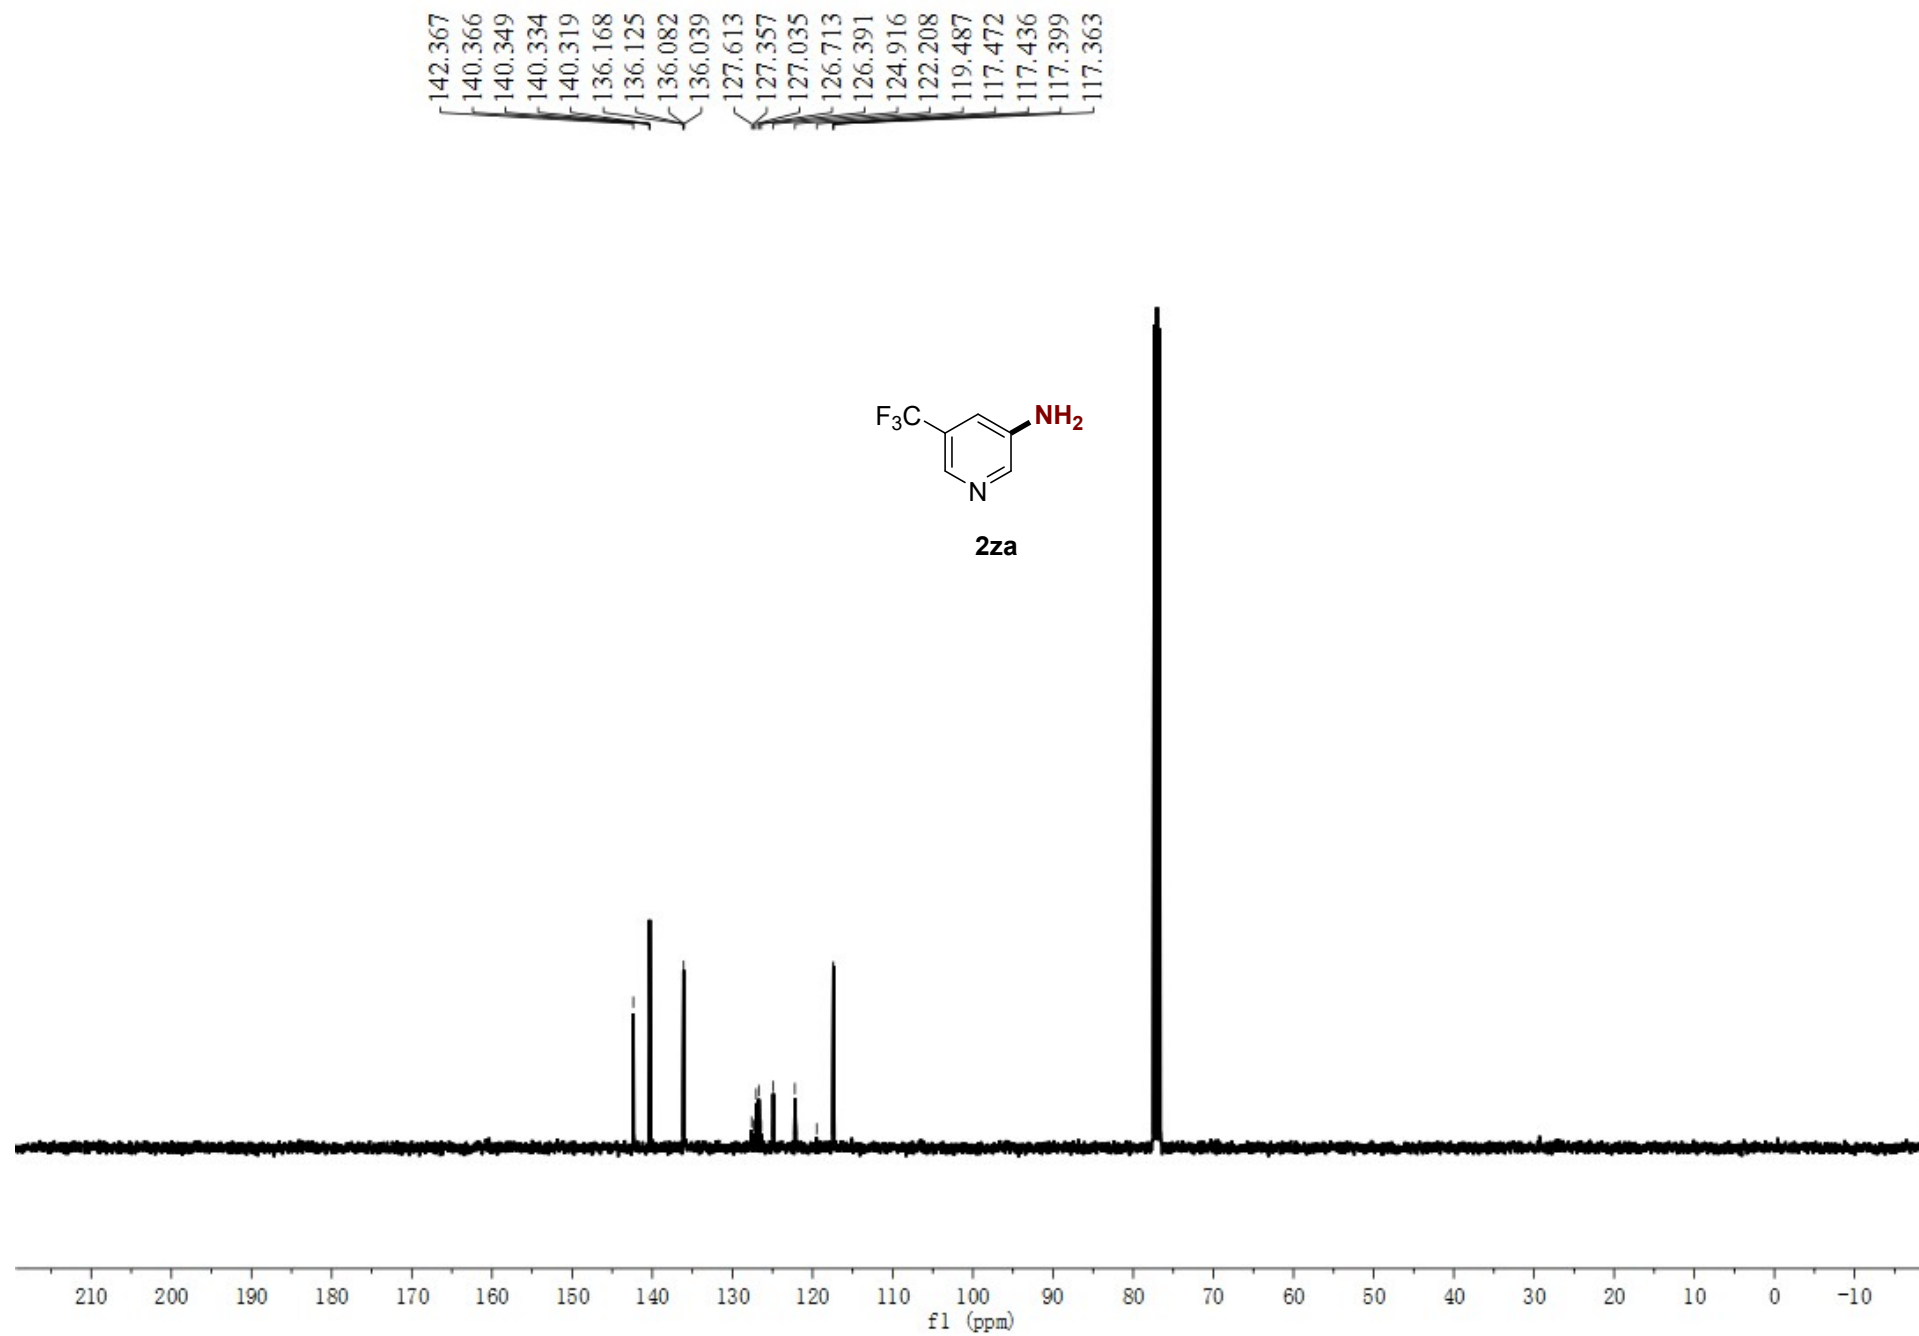

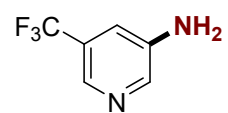

**2za**

— -62.726

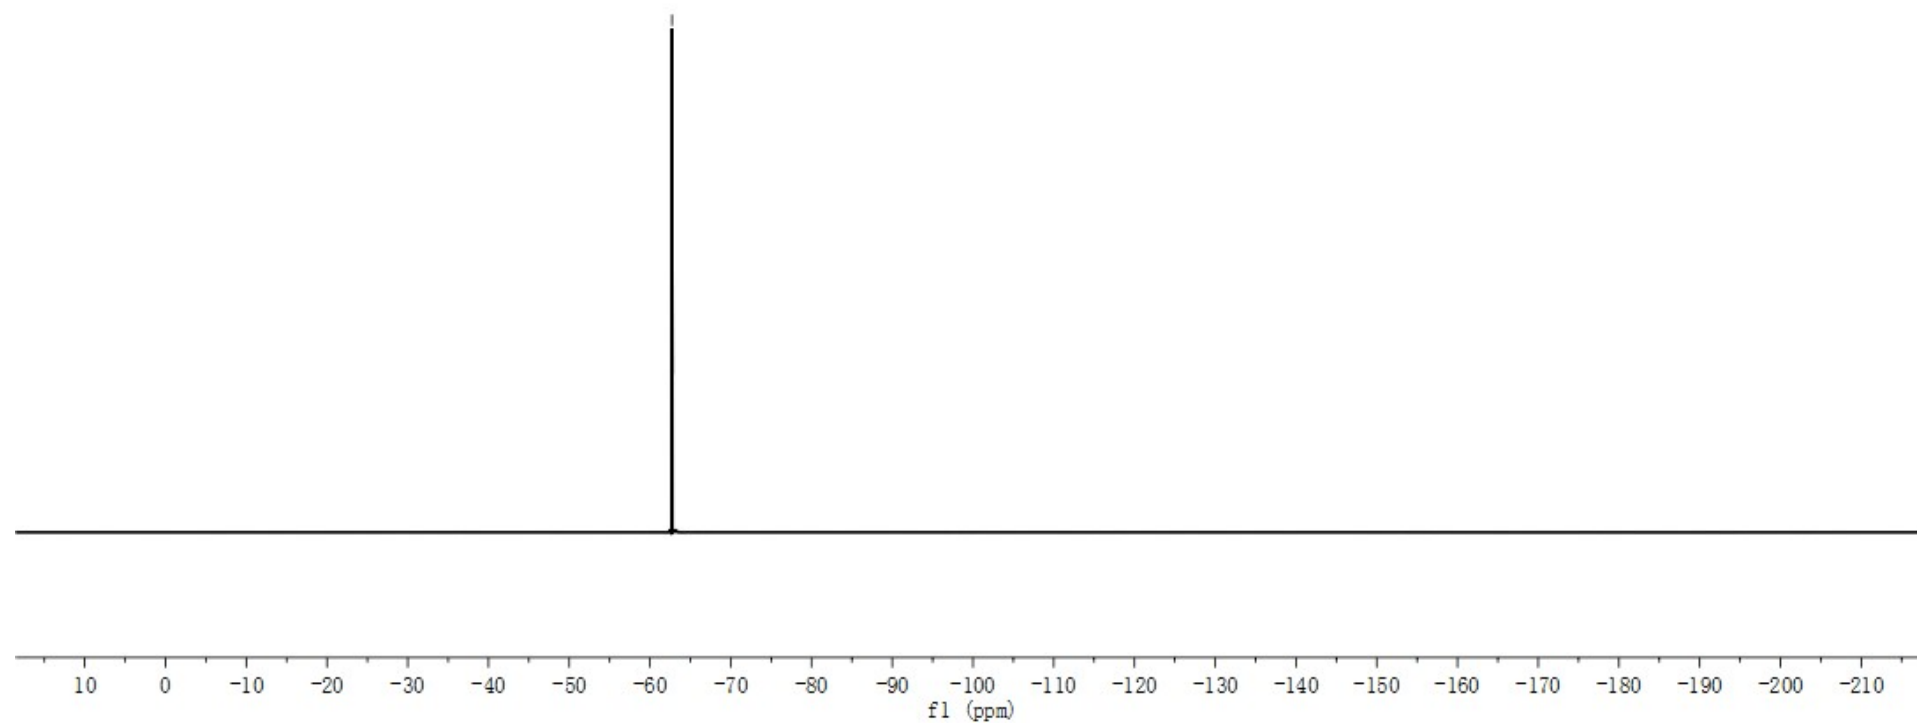

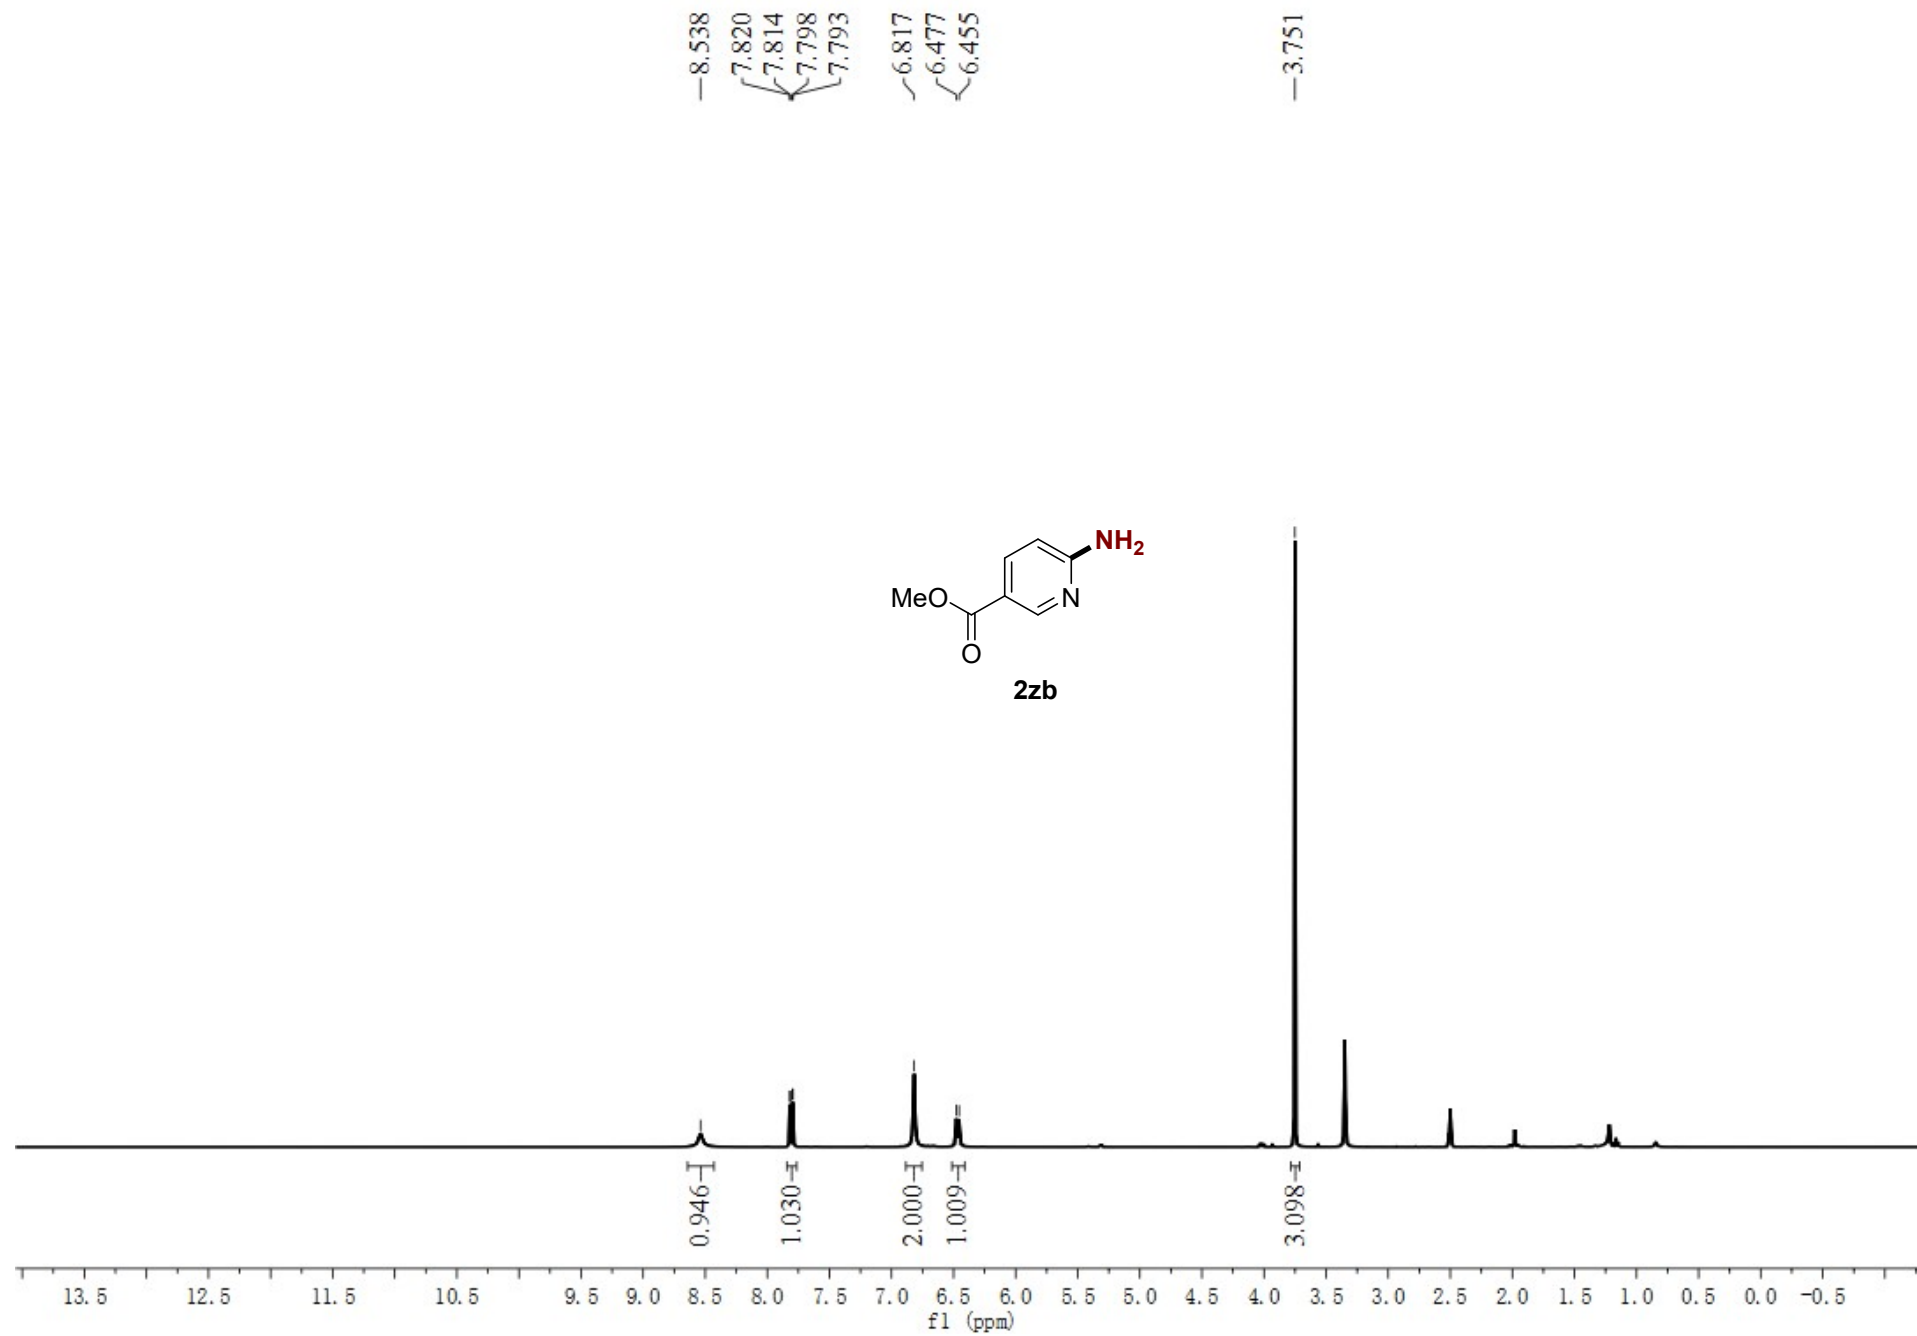

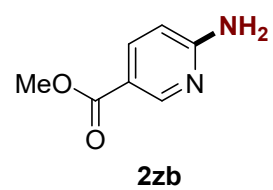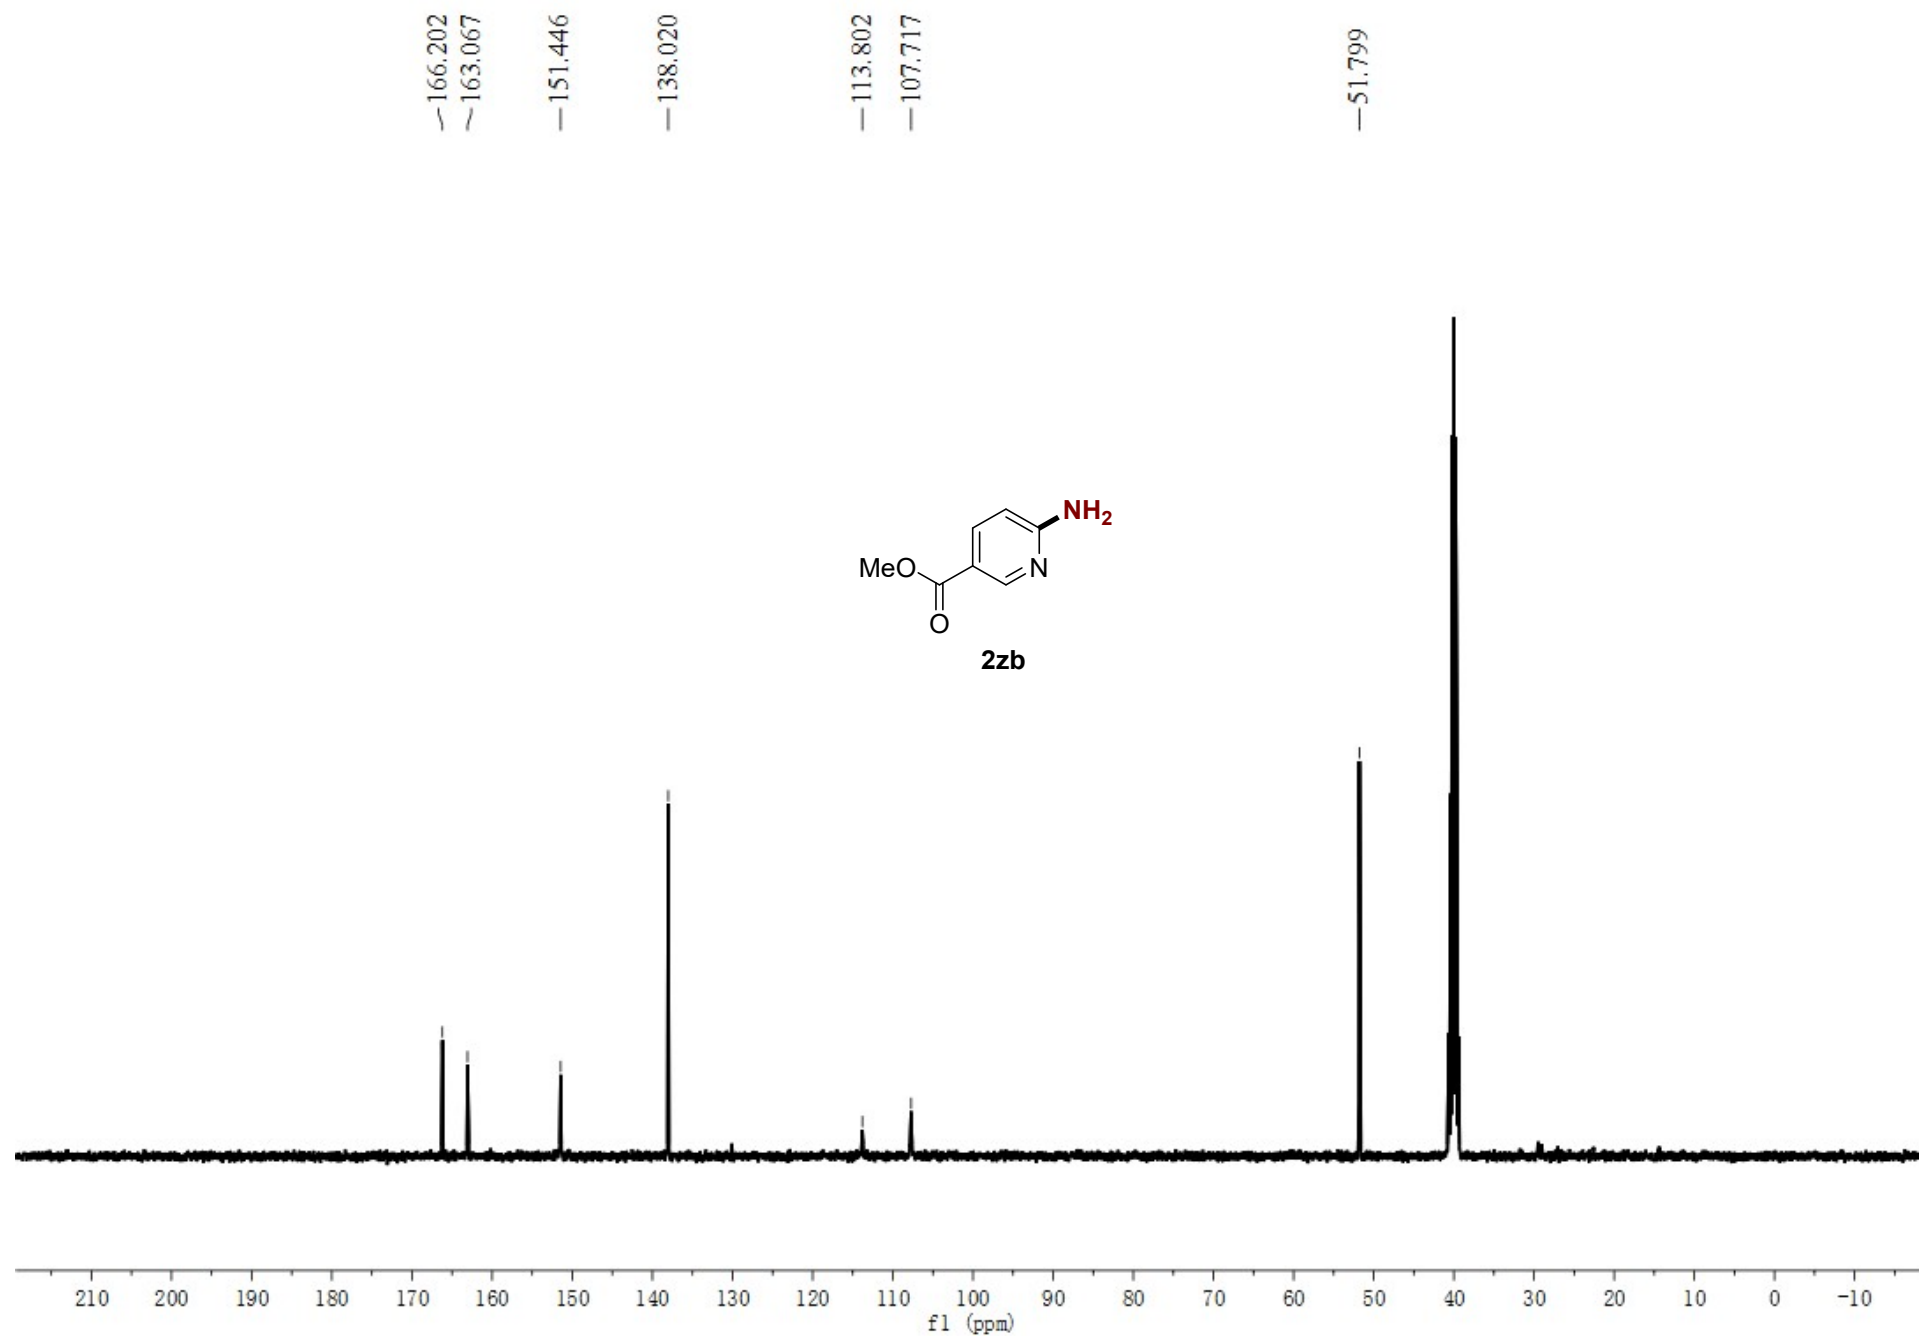

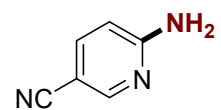

**2zc**

8.358  
8.354  
7.622  
7.617  
7.601  
7.595  
6.508  
6.486  
—5.039

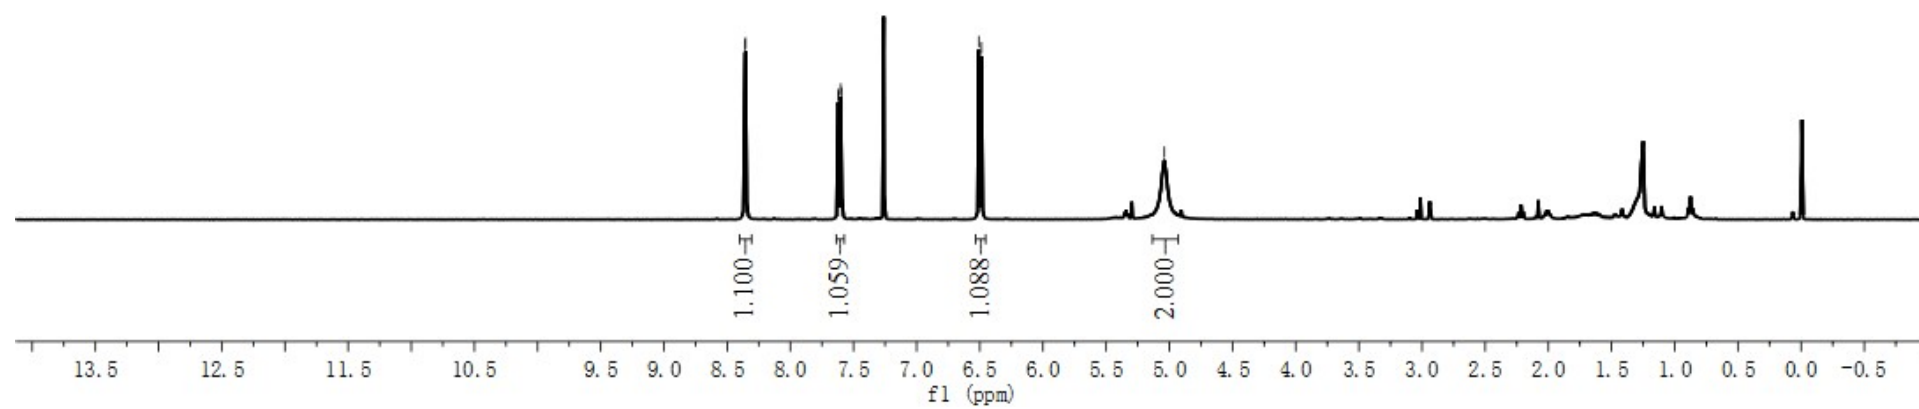

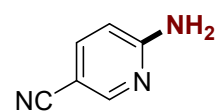

**2zc**

—160.128  
—153.168  
—140.236  
—118.123  
—108.005  
—98.479

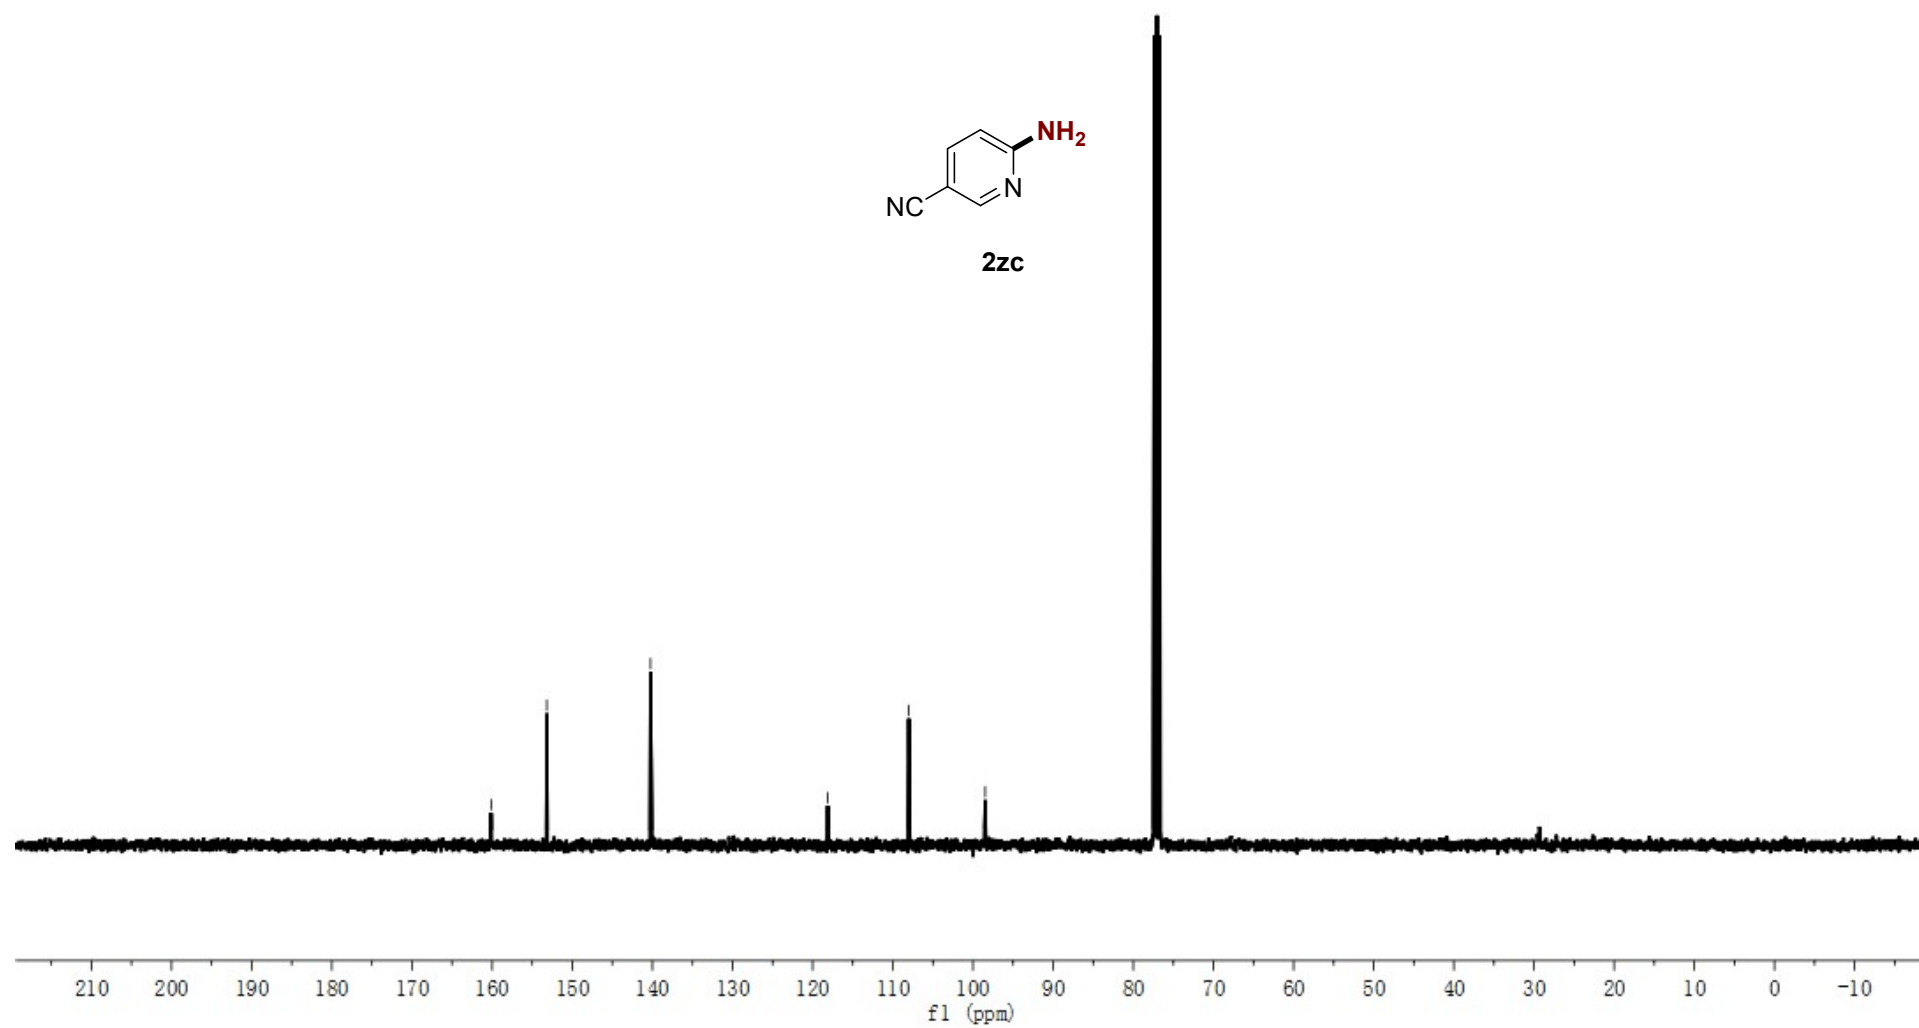

7.517  
7.499  
7.496  
7.478  
7.044  
7.042  
7.026  
7.024  
6.689  
6.687  
6.668  
6.666  
-4.853

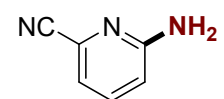

2zd

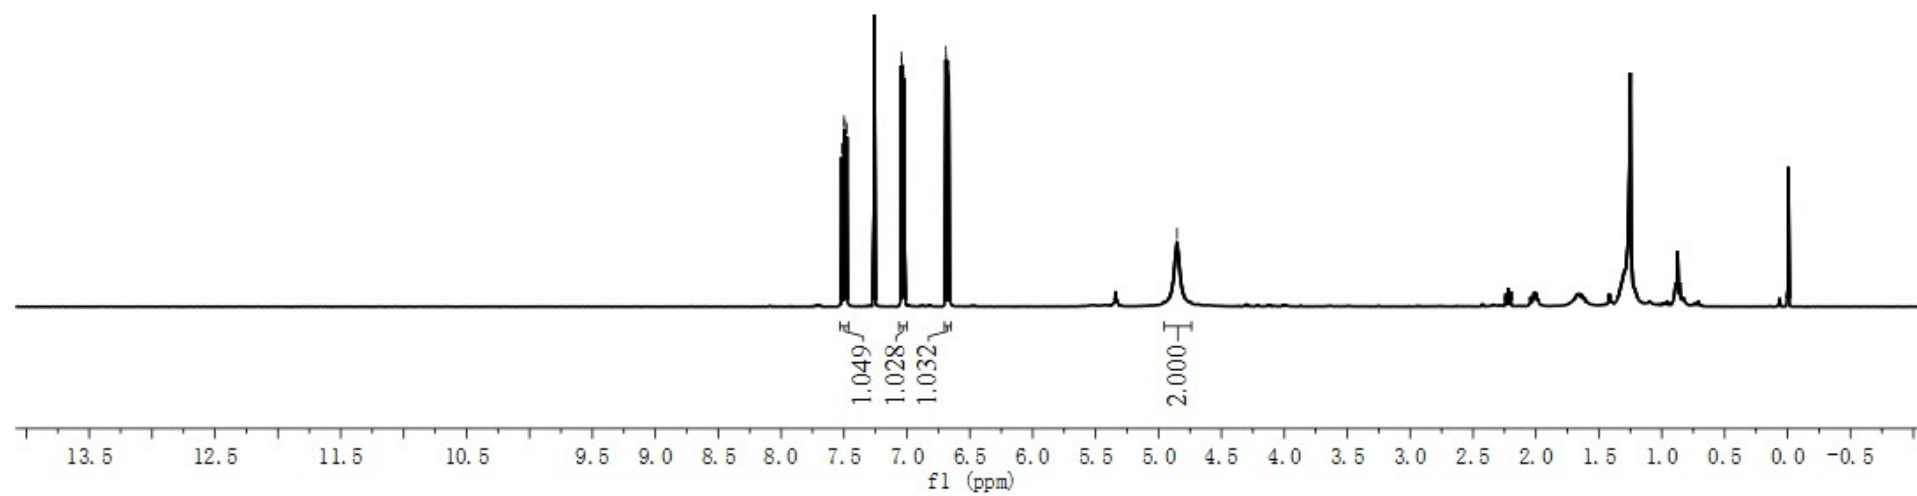

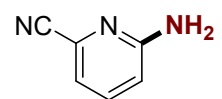

**2zd**

—158.892

—138.160

—131.621

~118.971

~117.598

~112.801

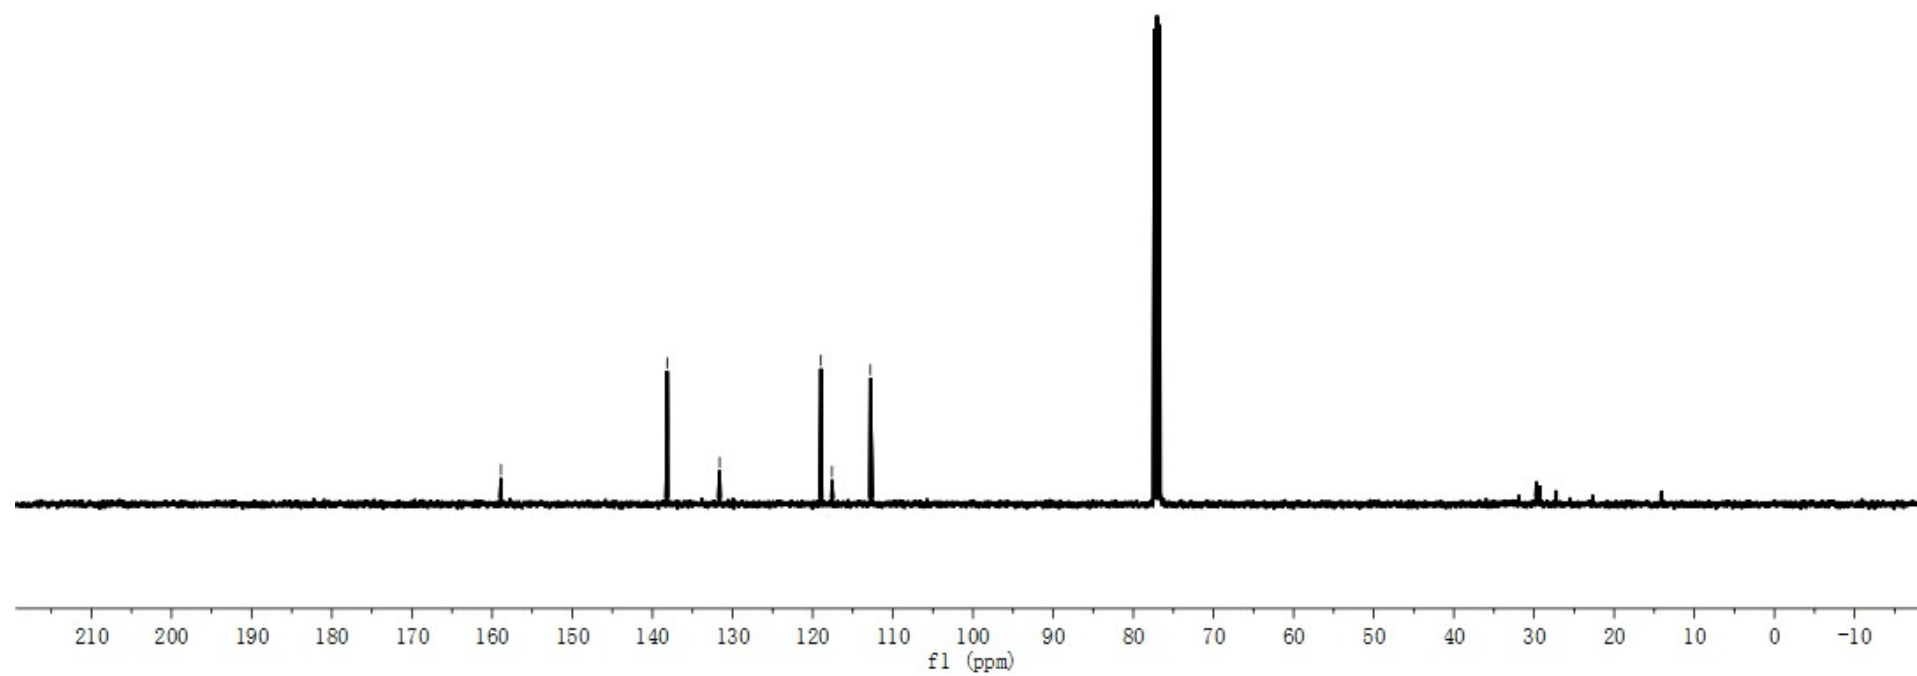

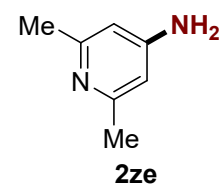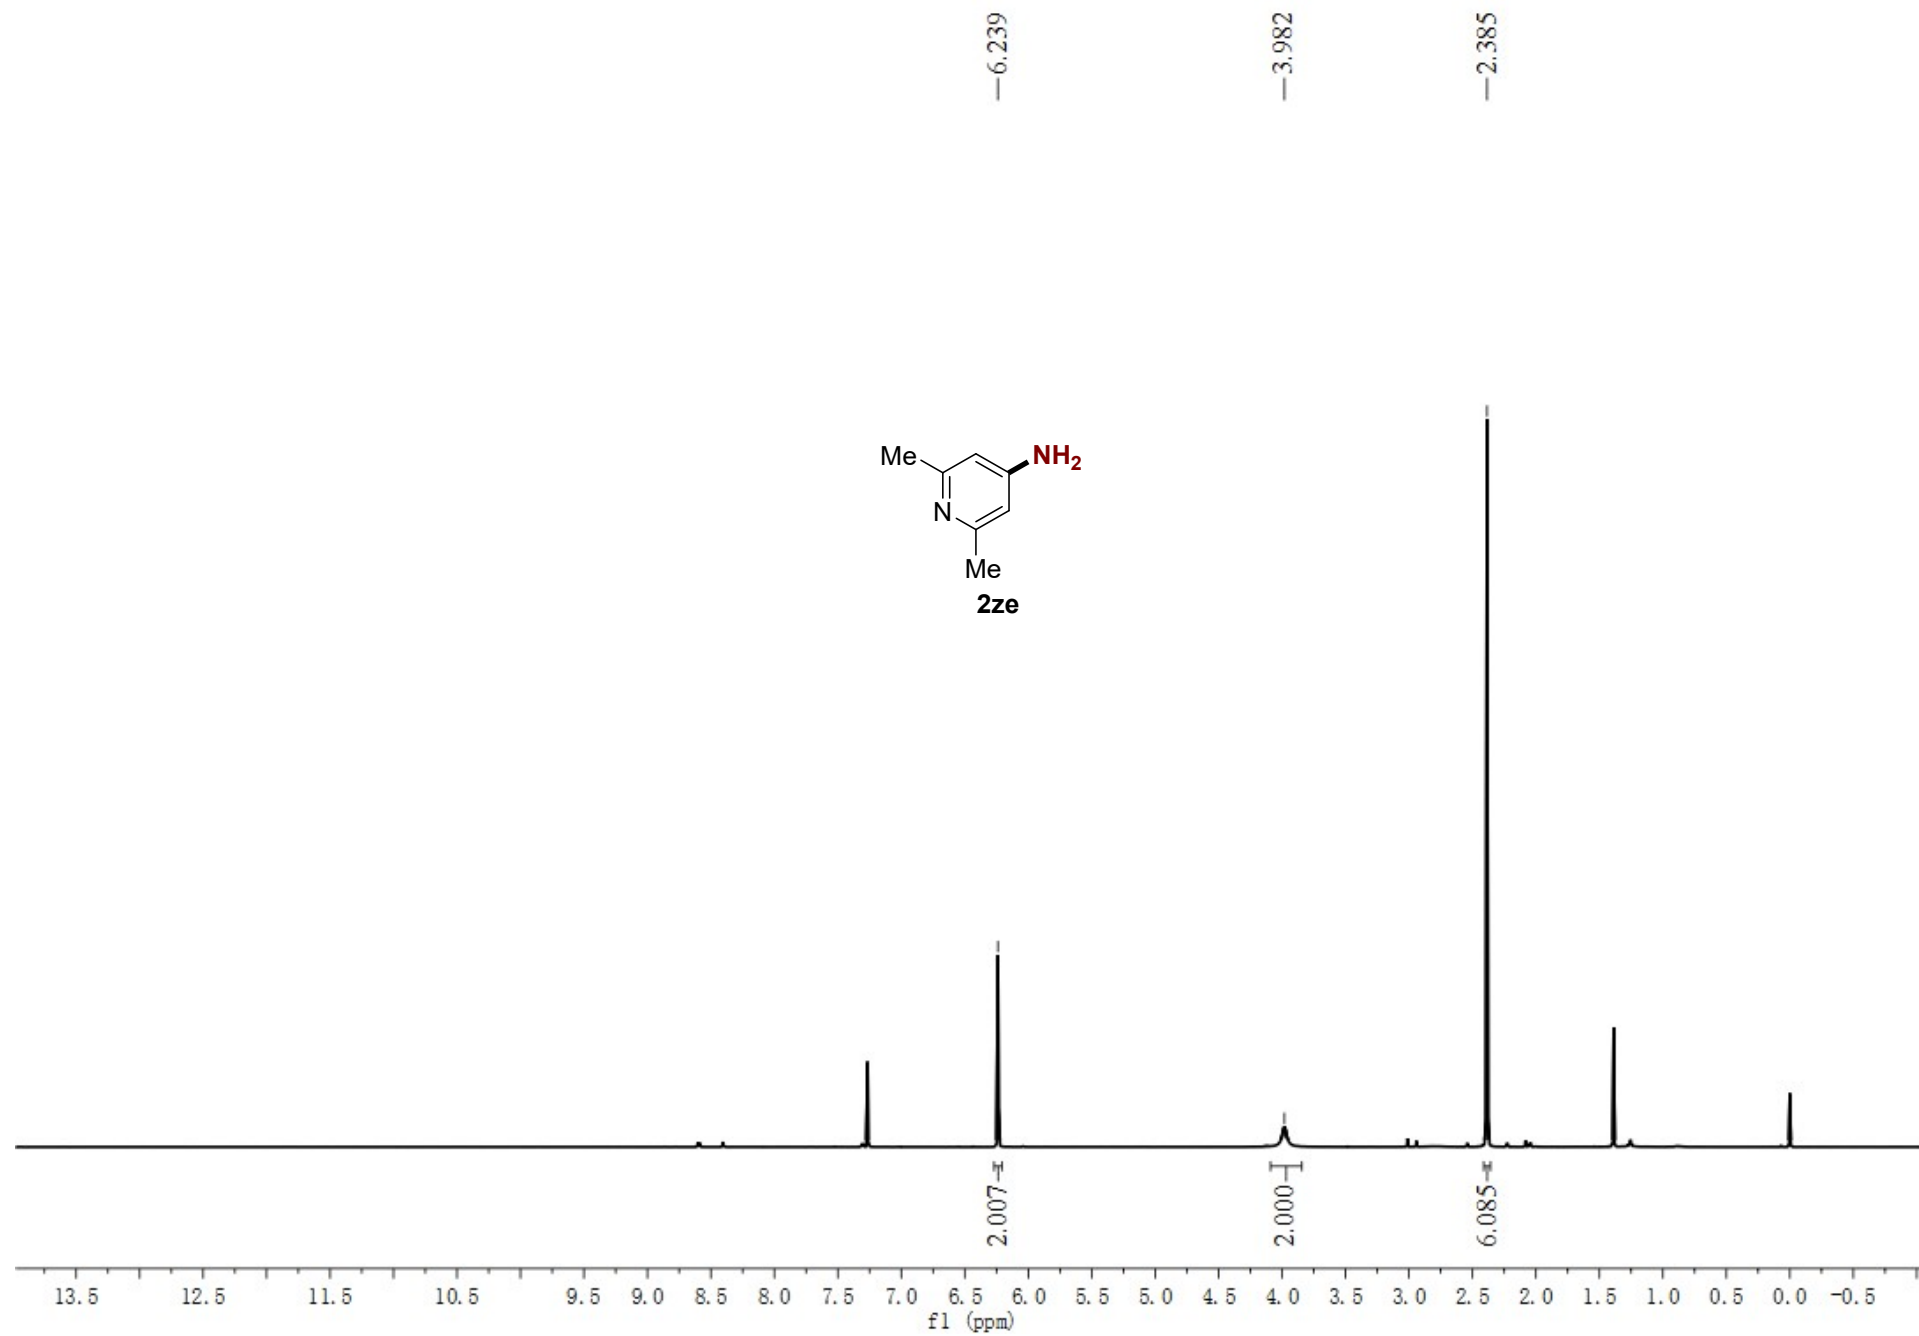

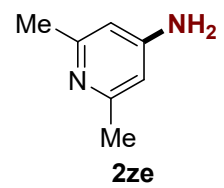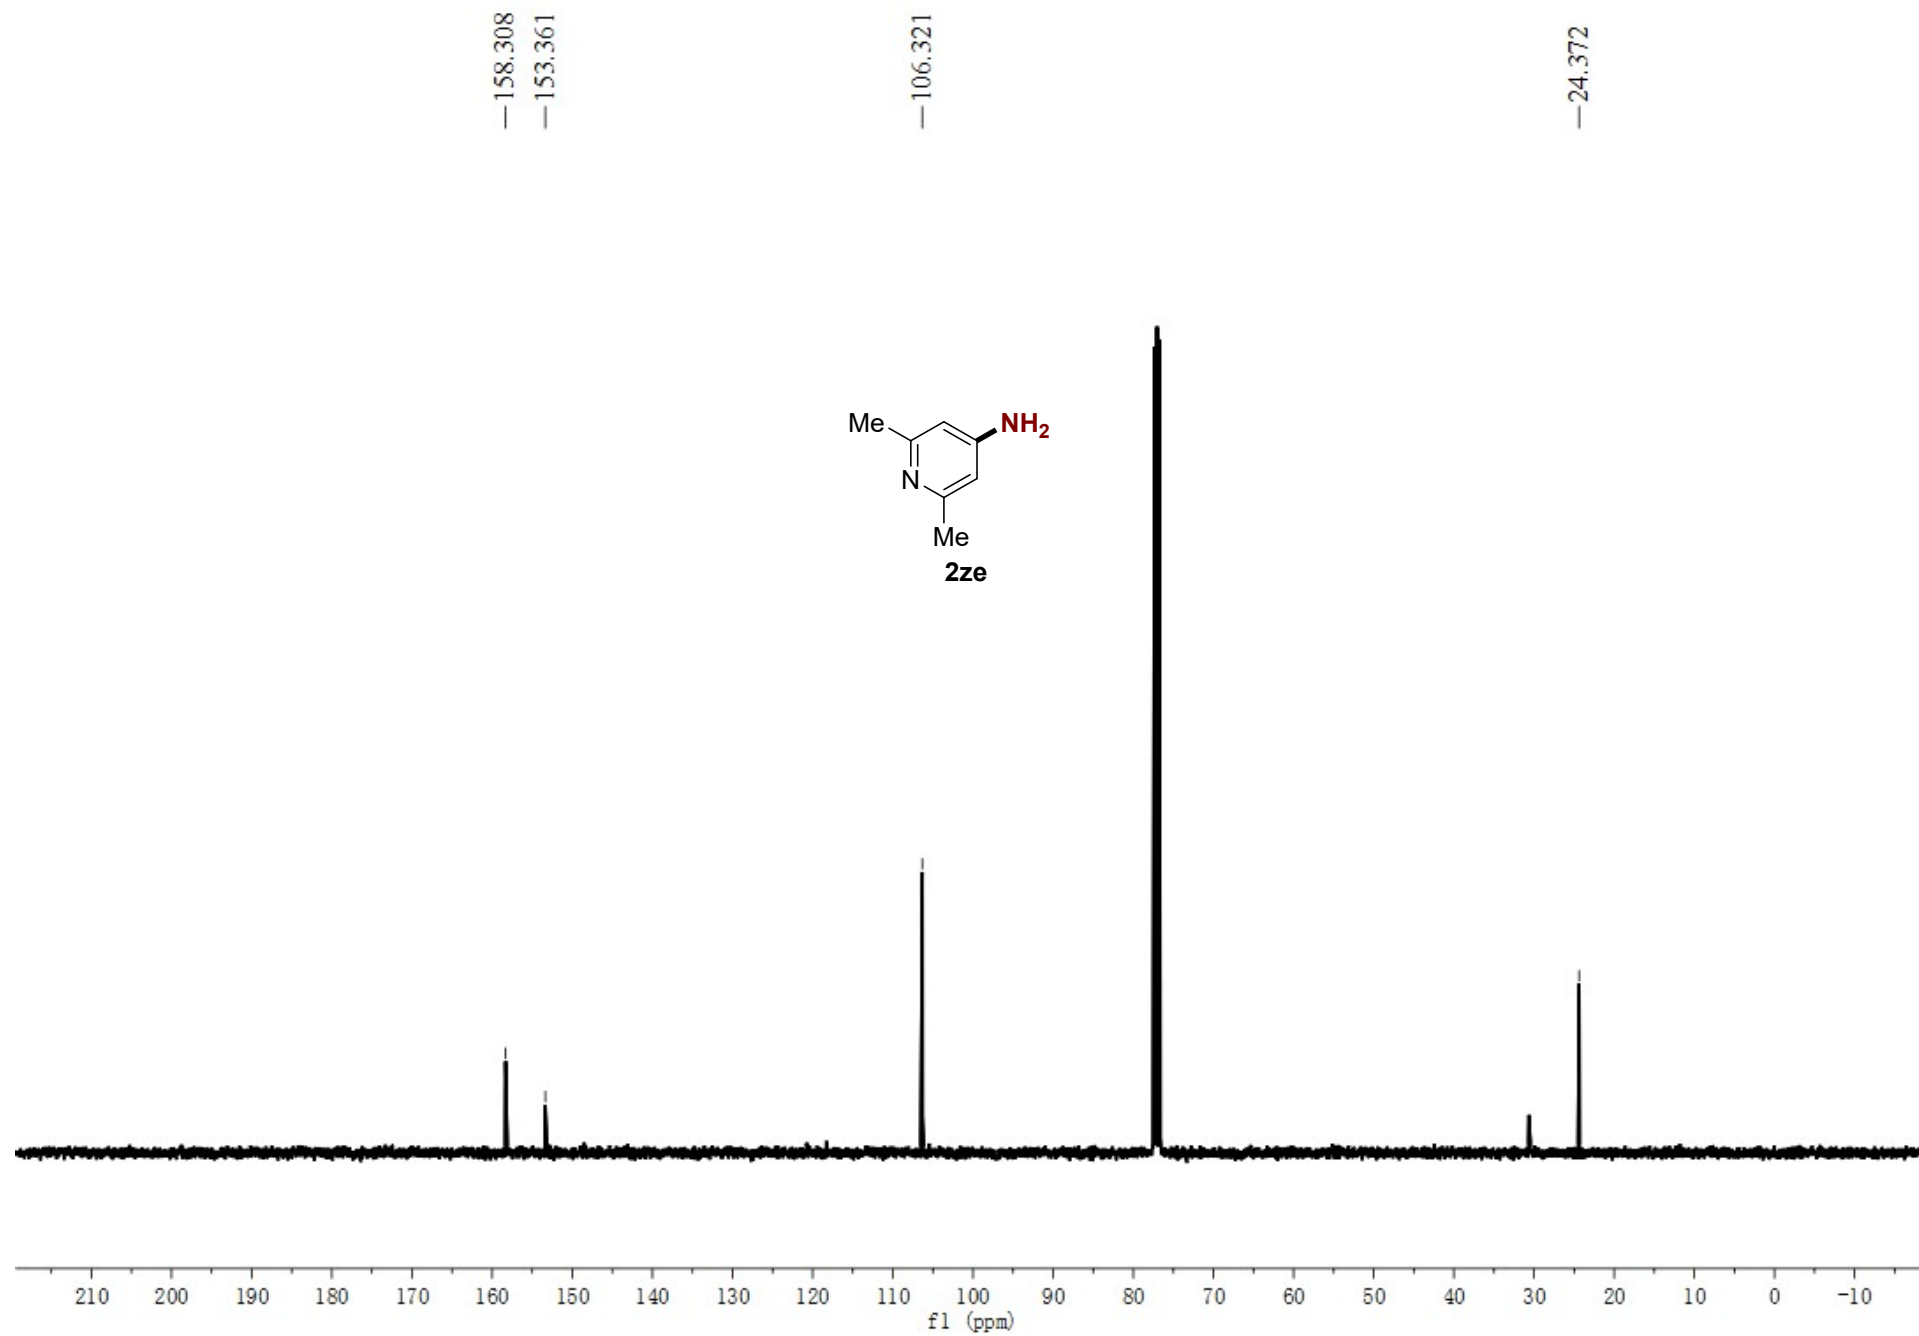

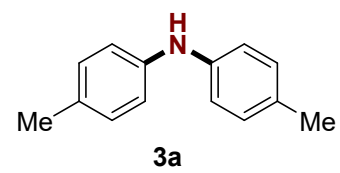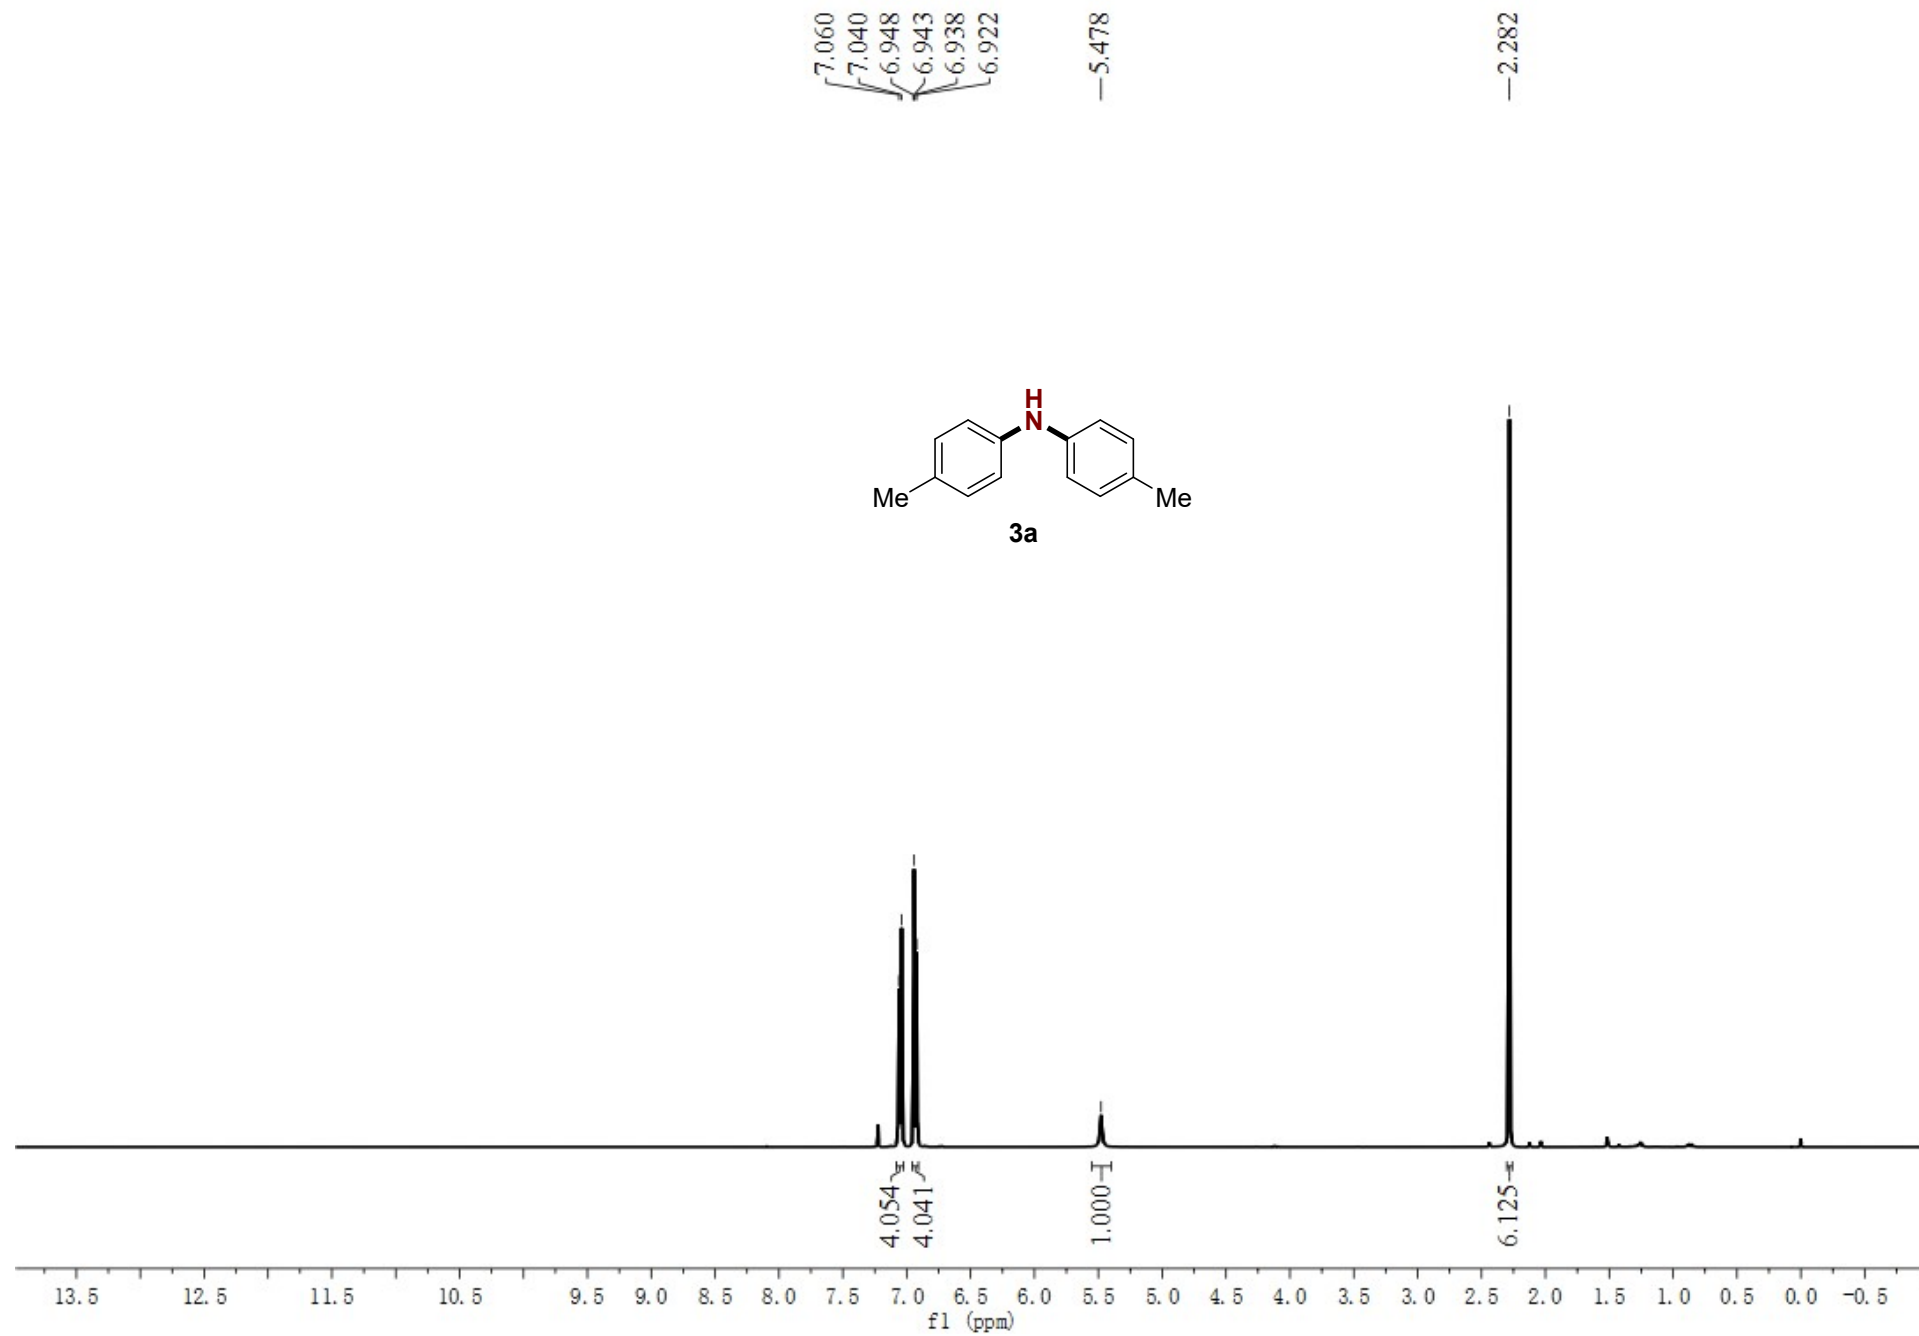

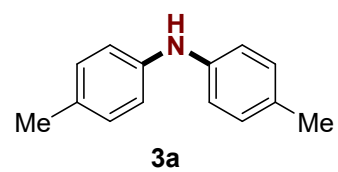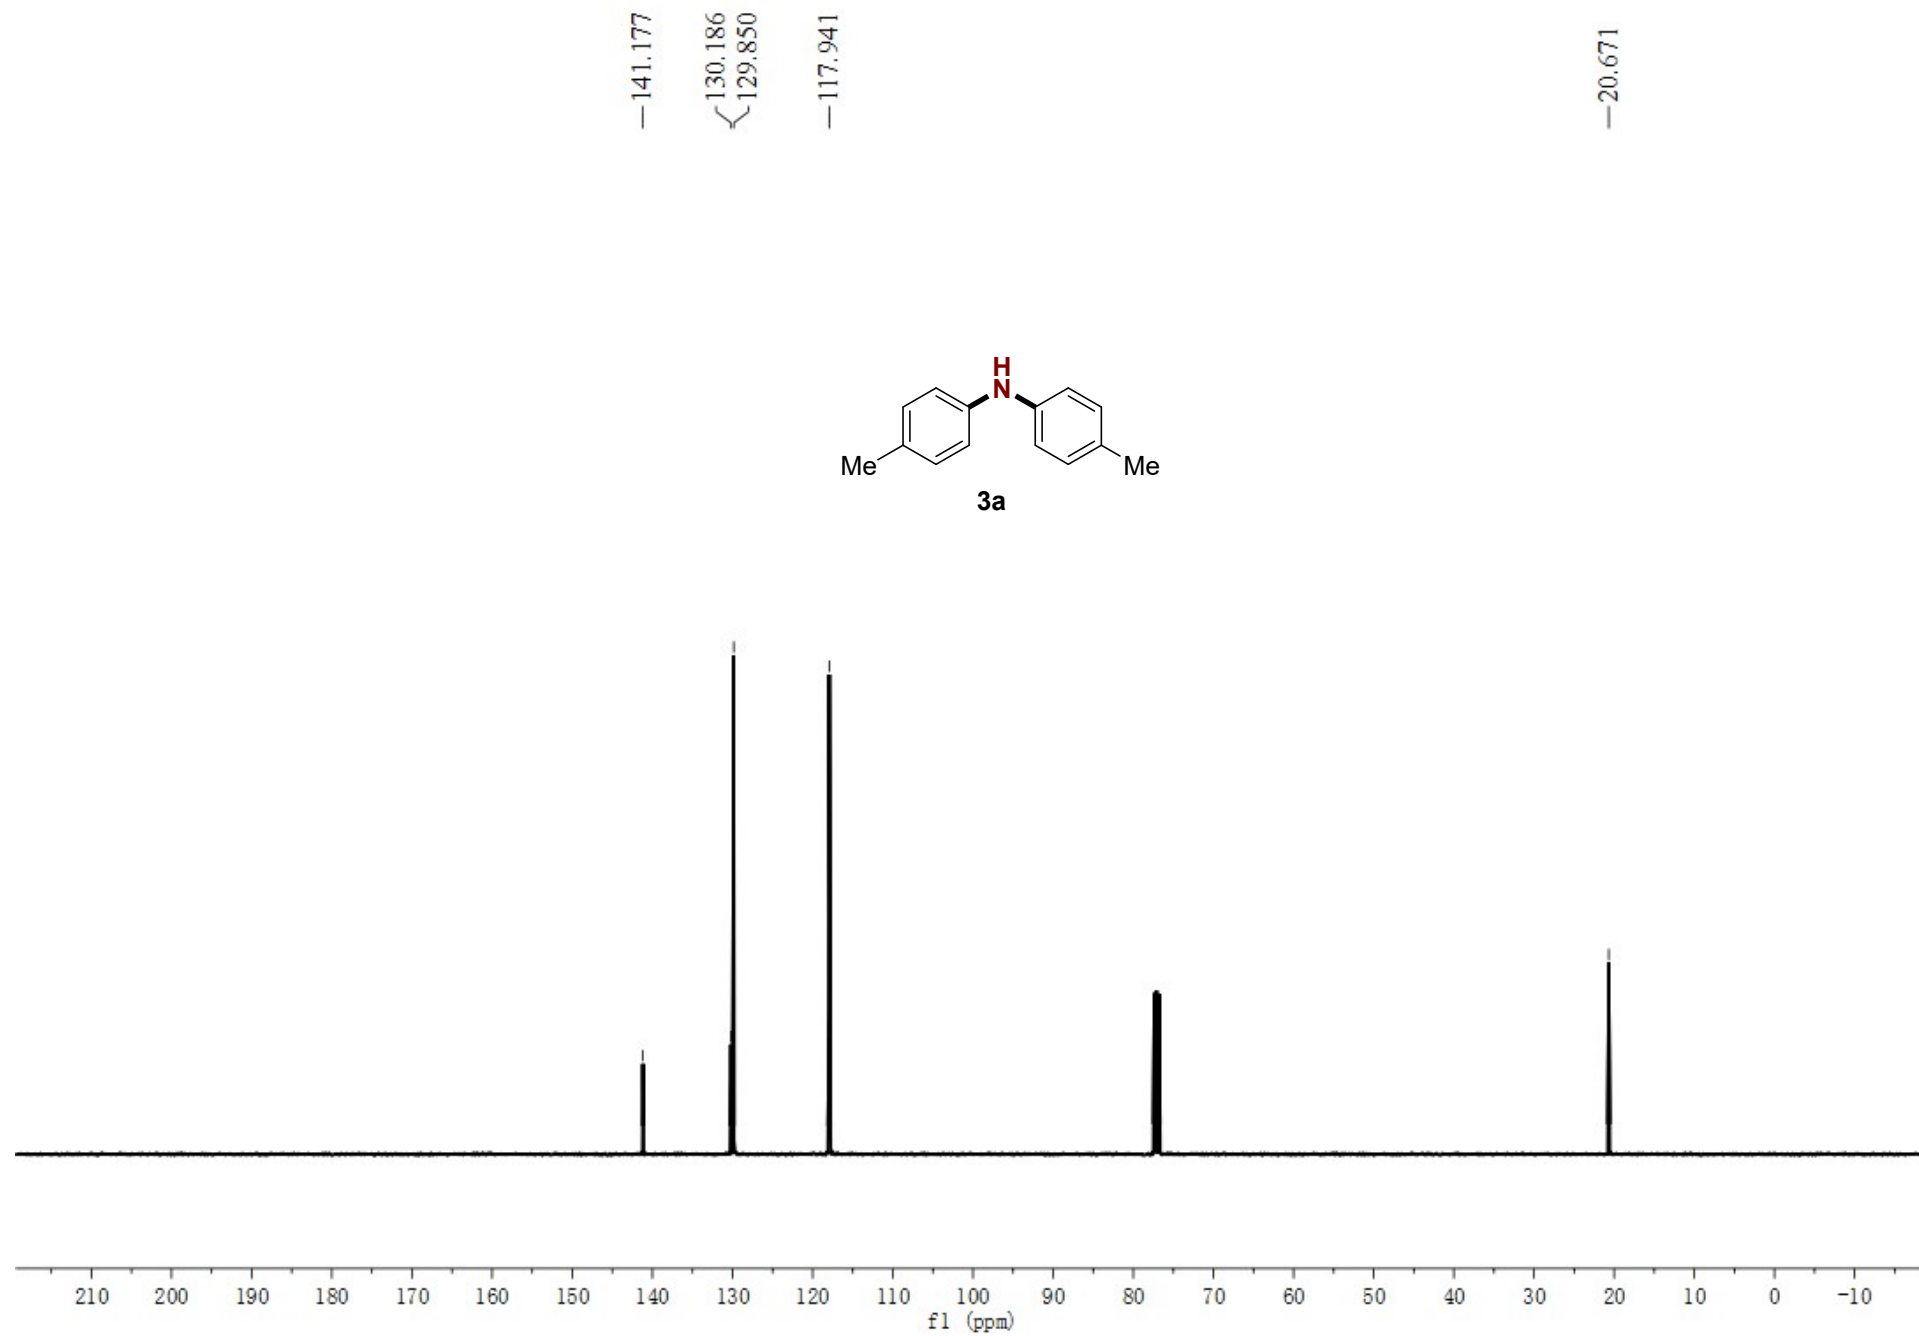

7.091  
7.069  
6.984  
6.978  
6.973  
6.962  
6.957

— 5.517

2.615  
2.596  
2.577  
2.558

1.235  
1.216  
1.197

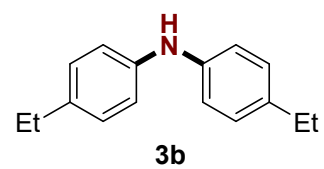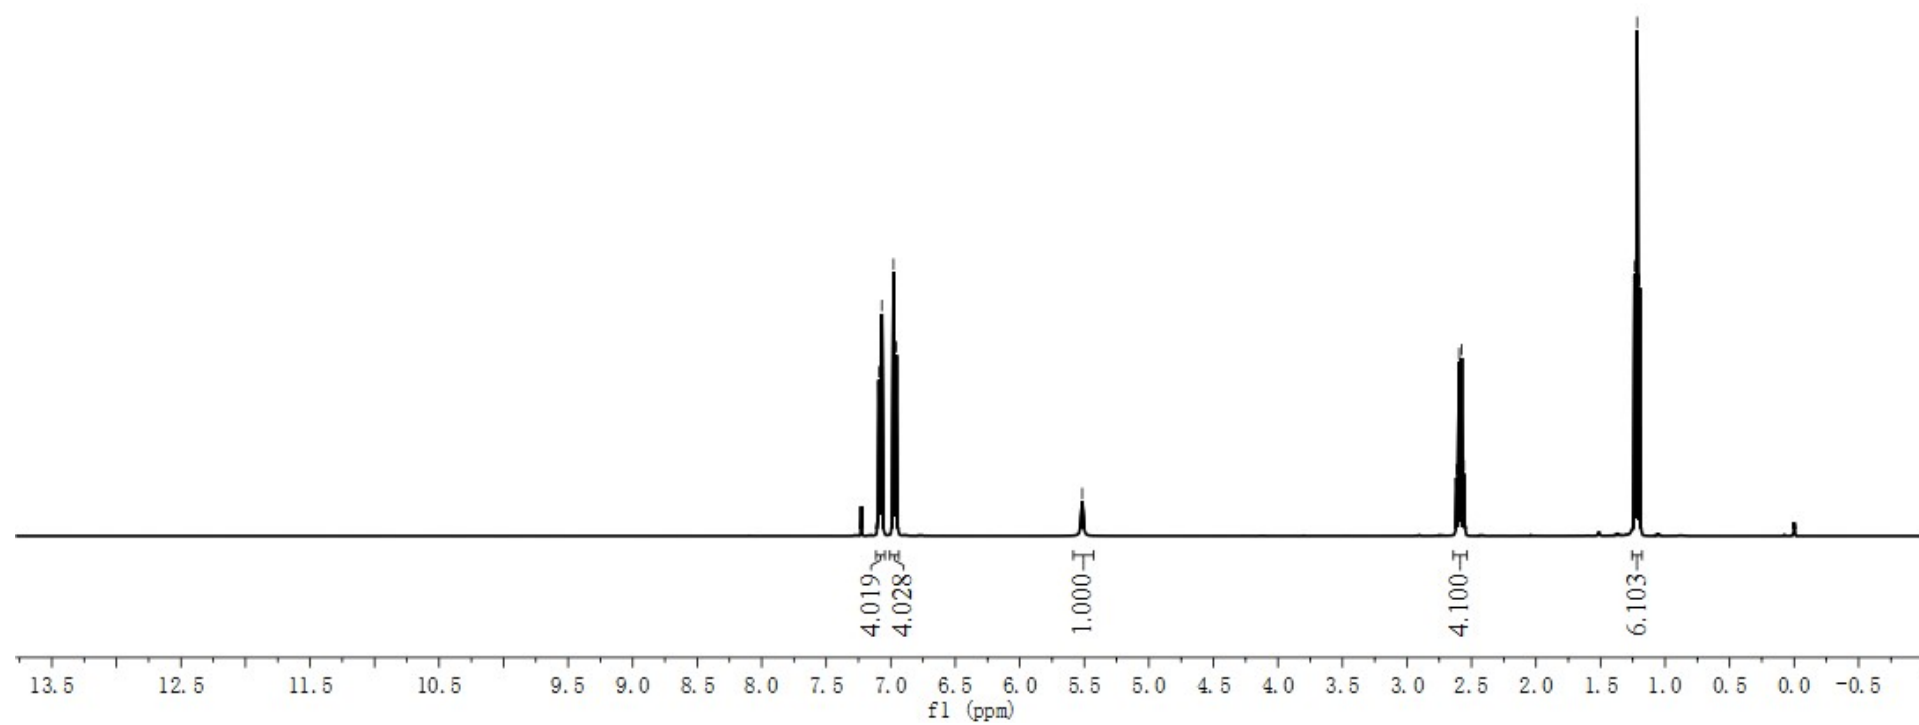

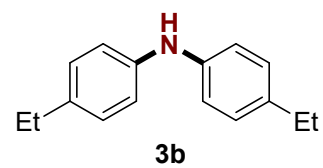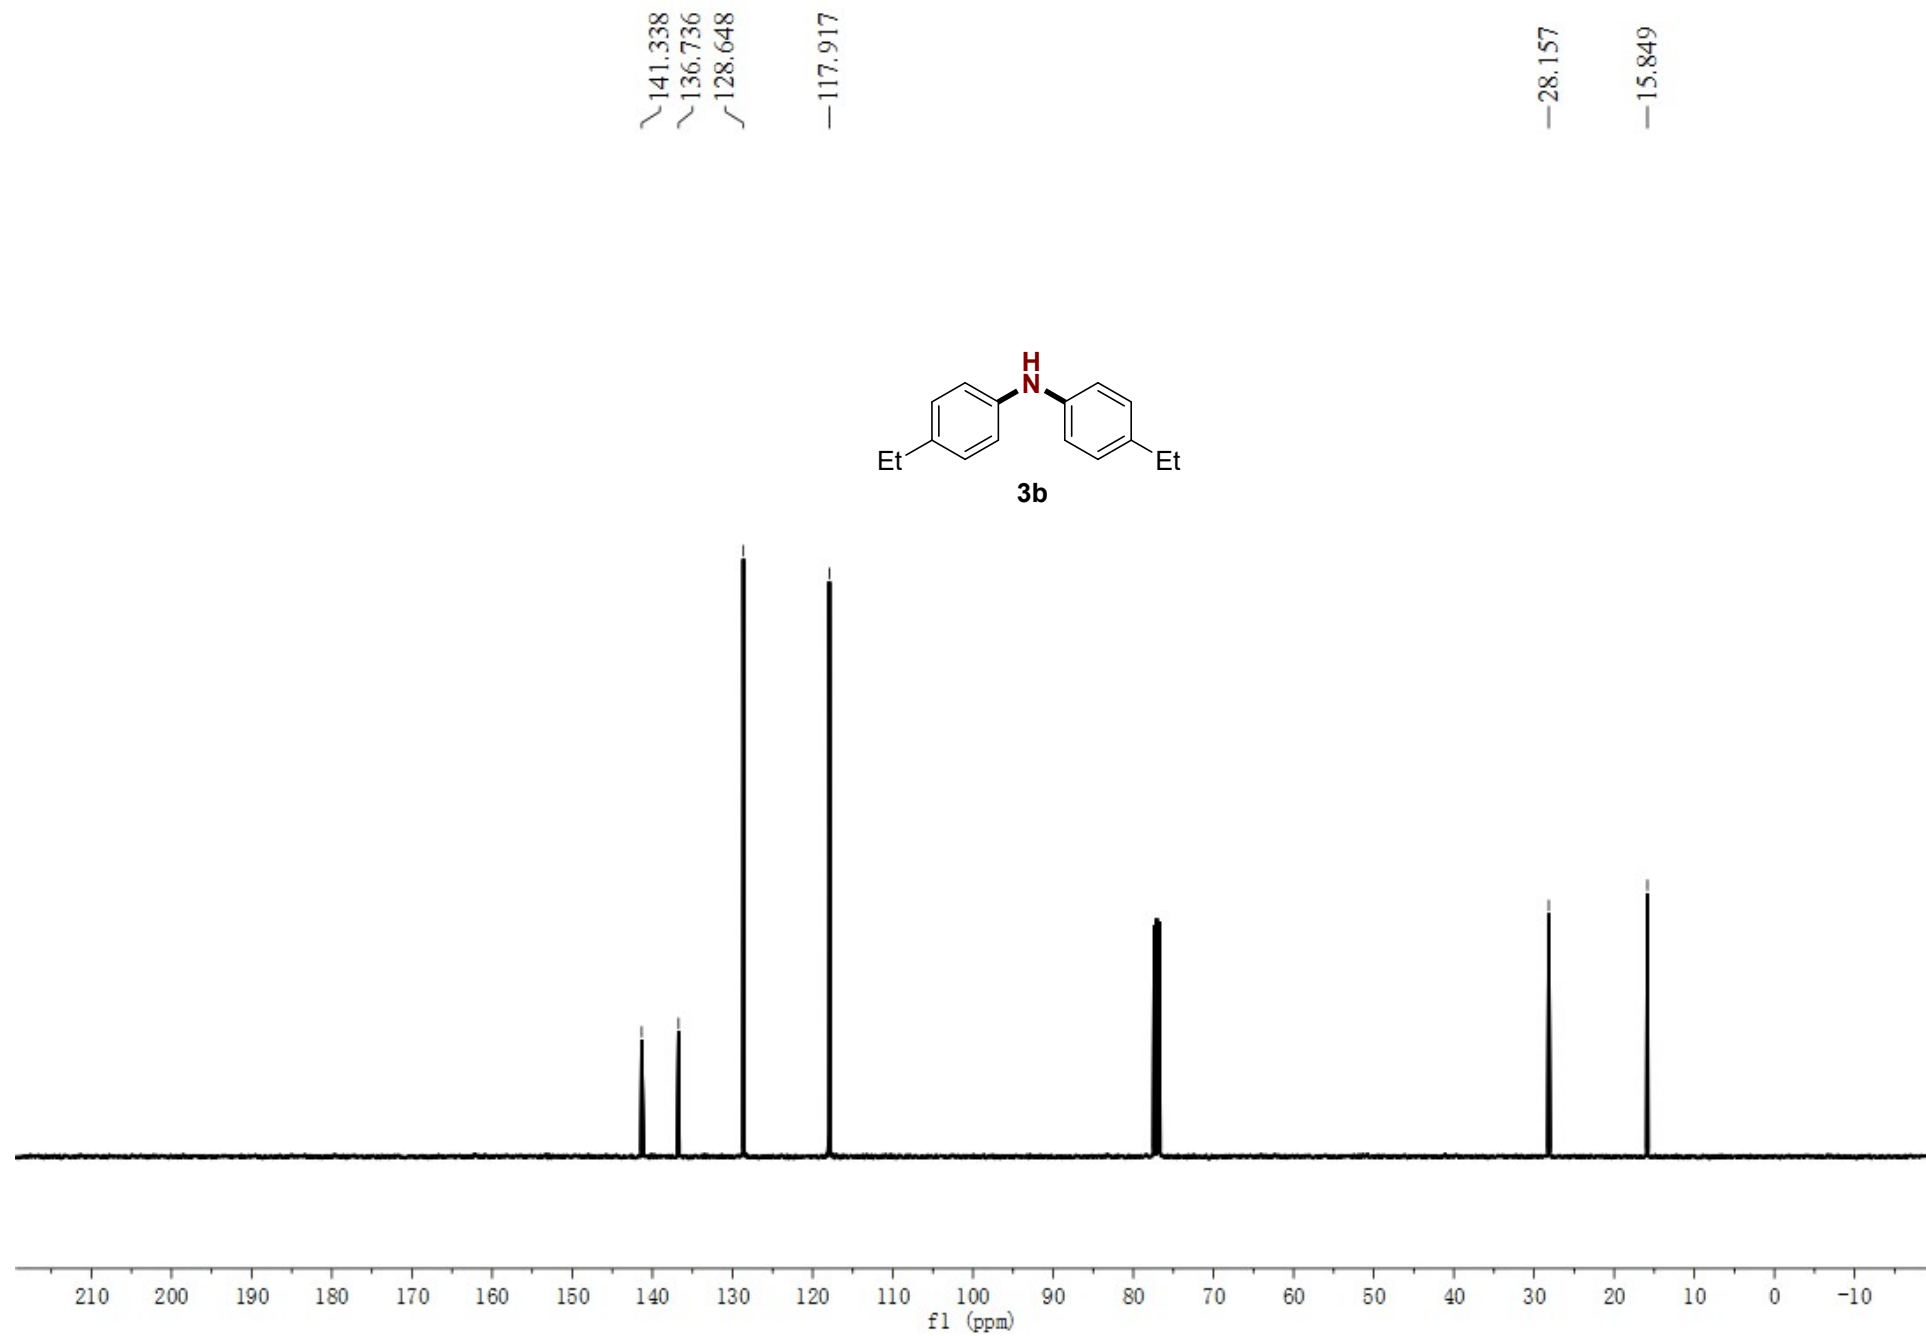

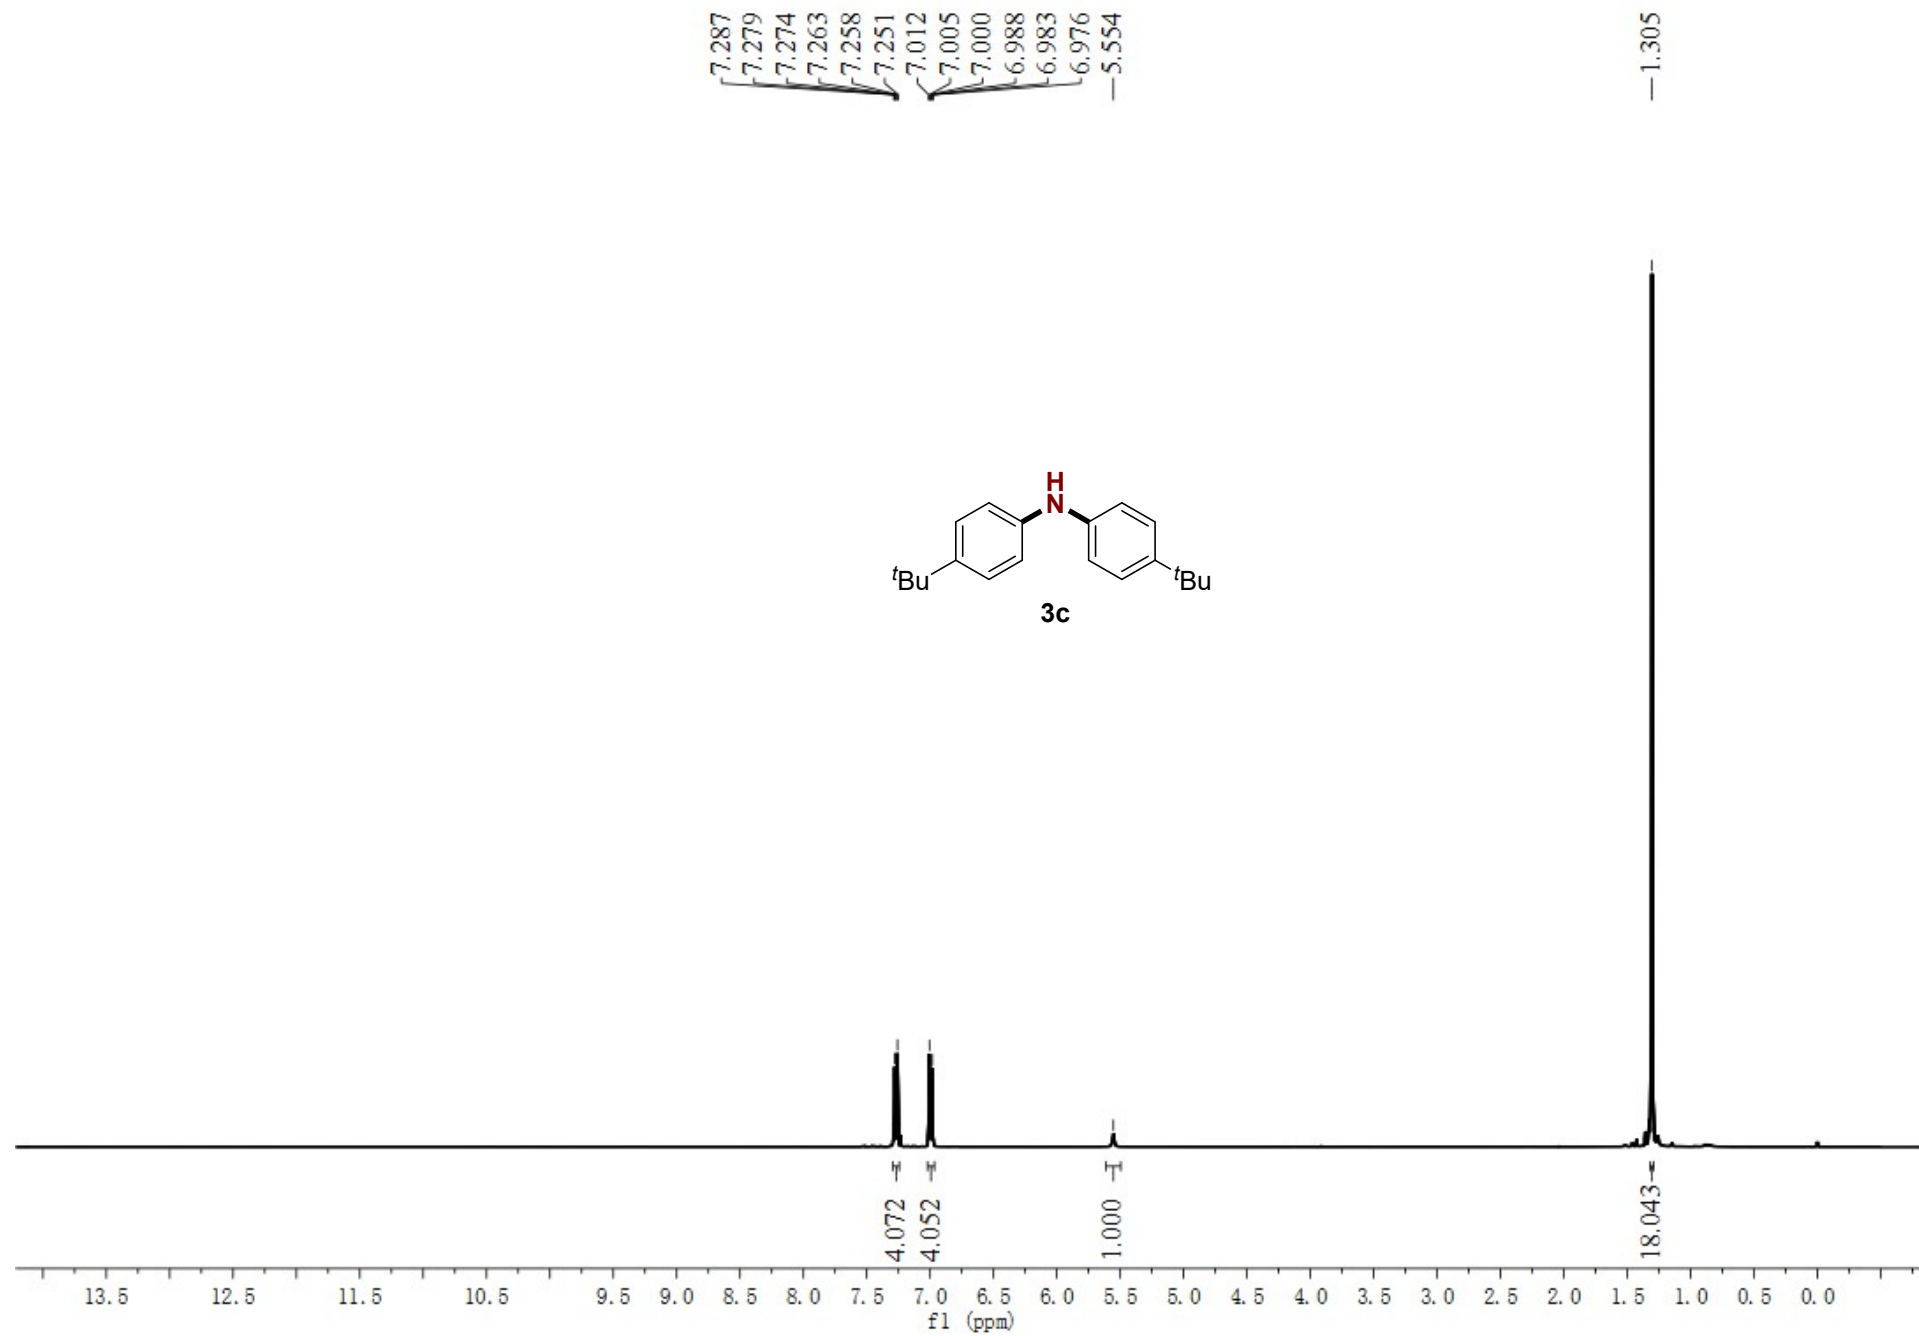

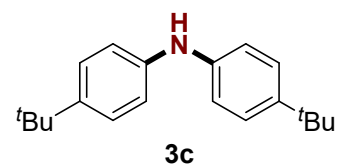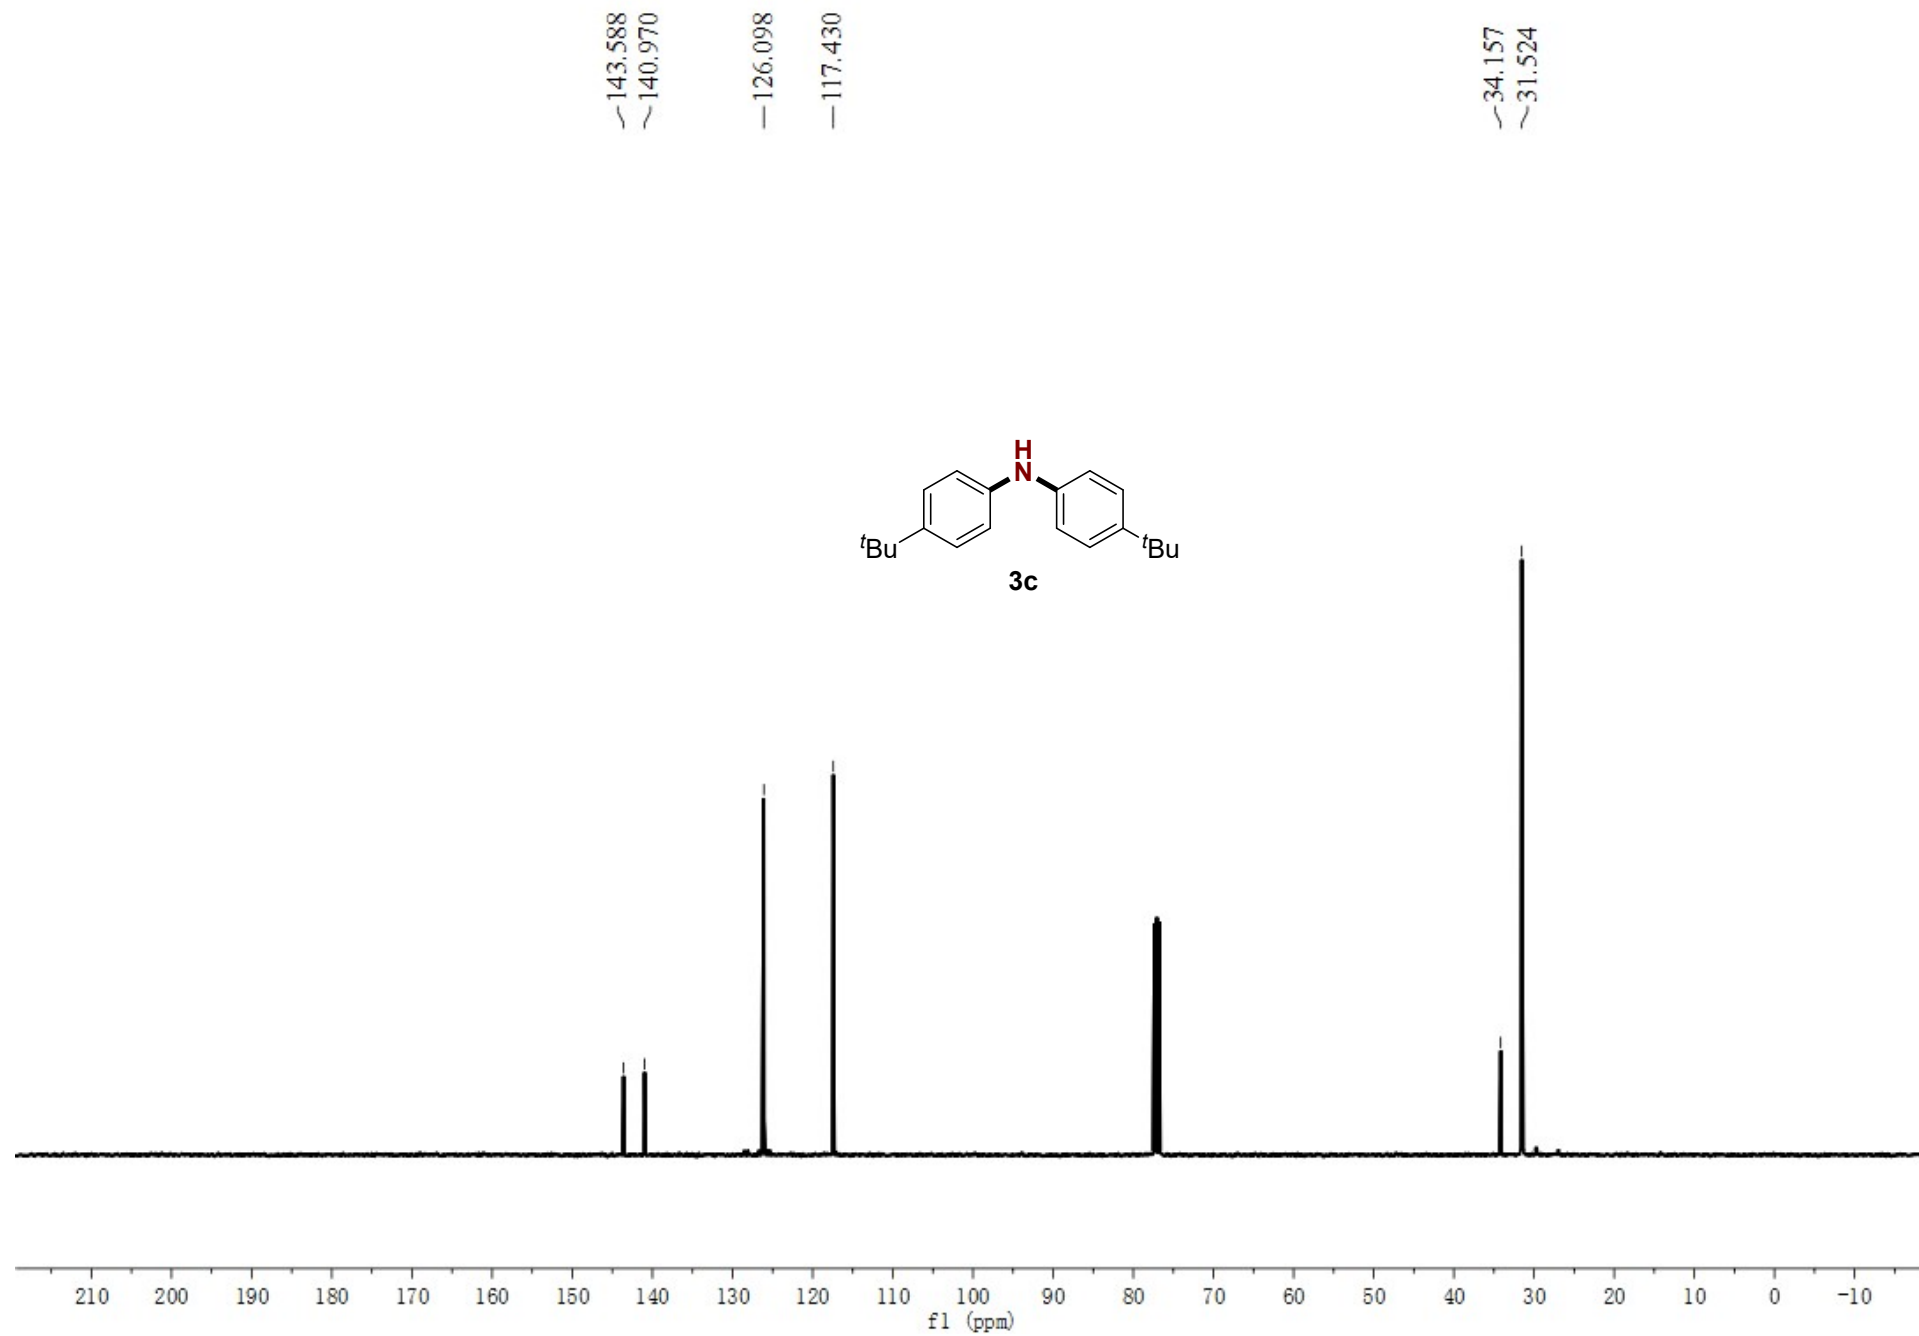

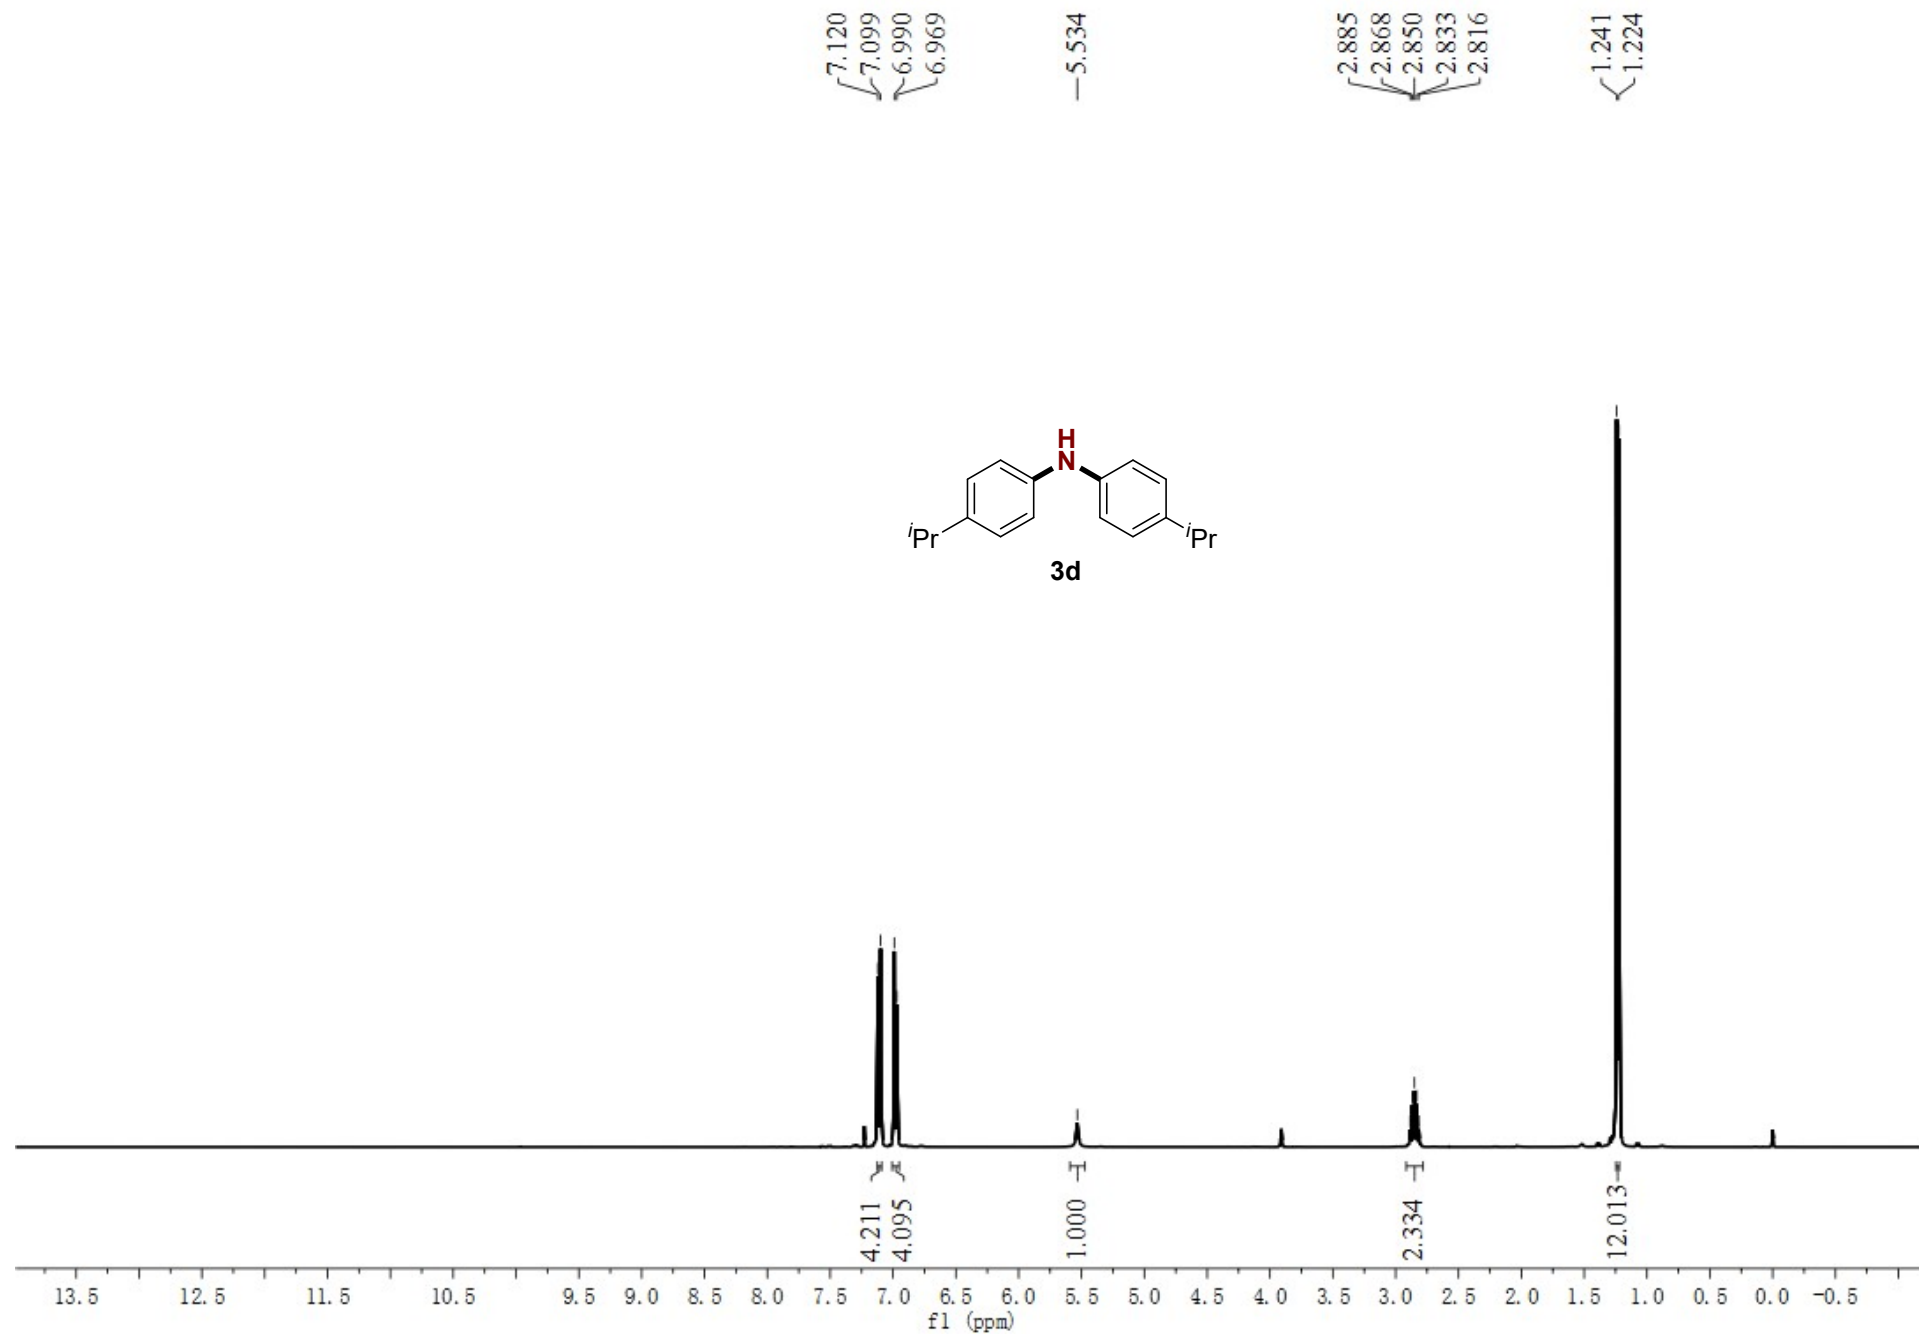

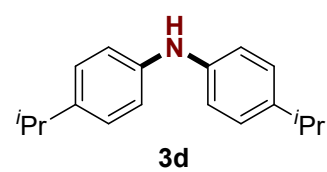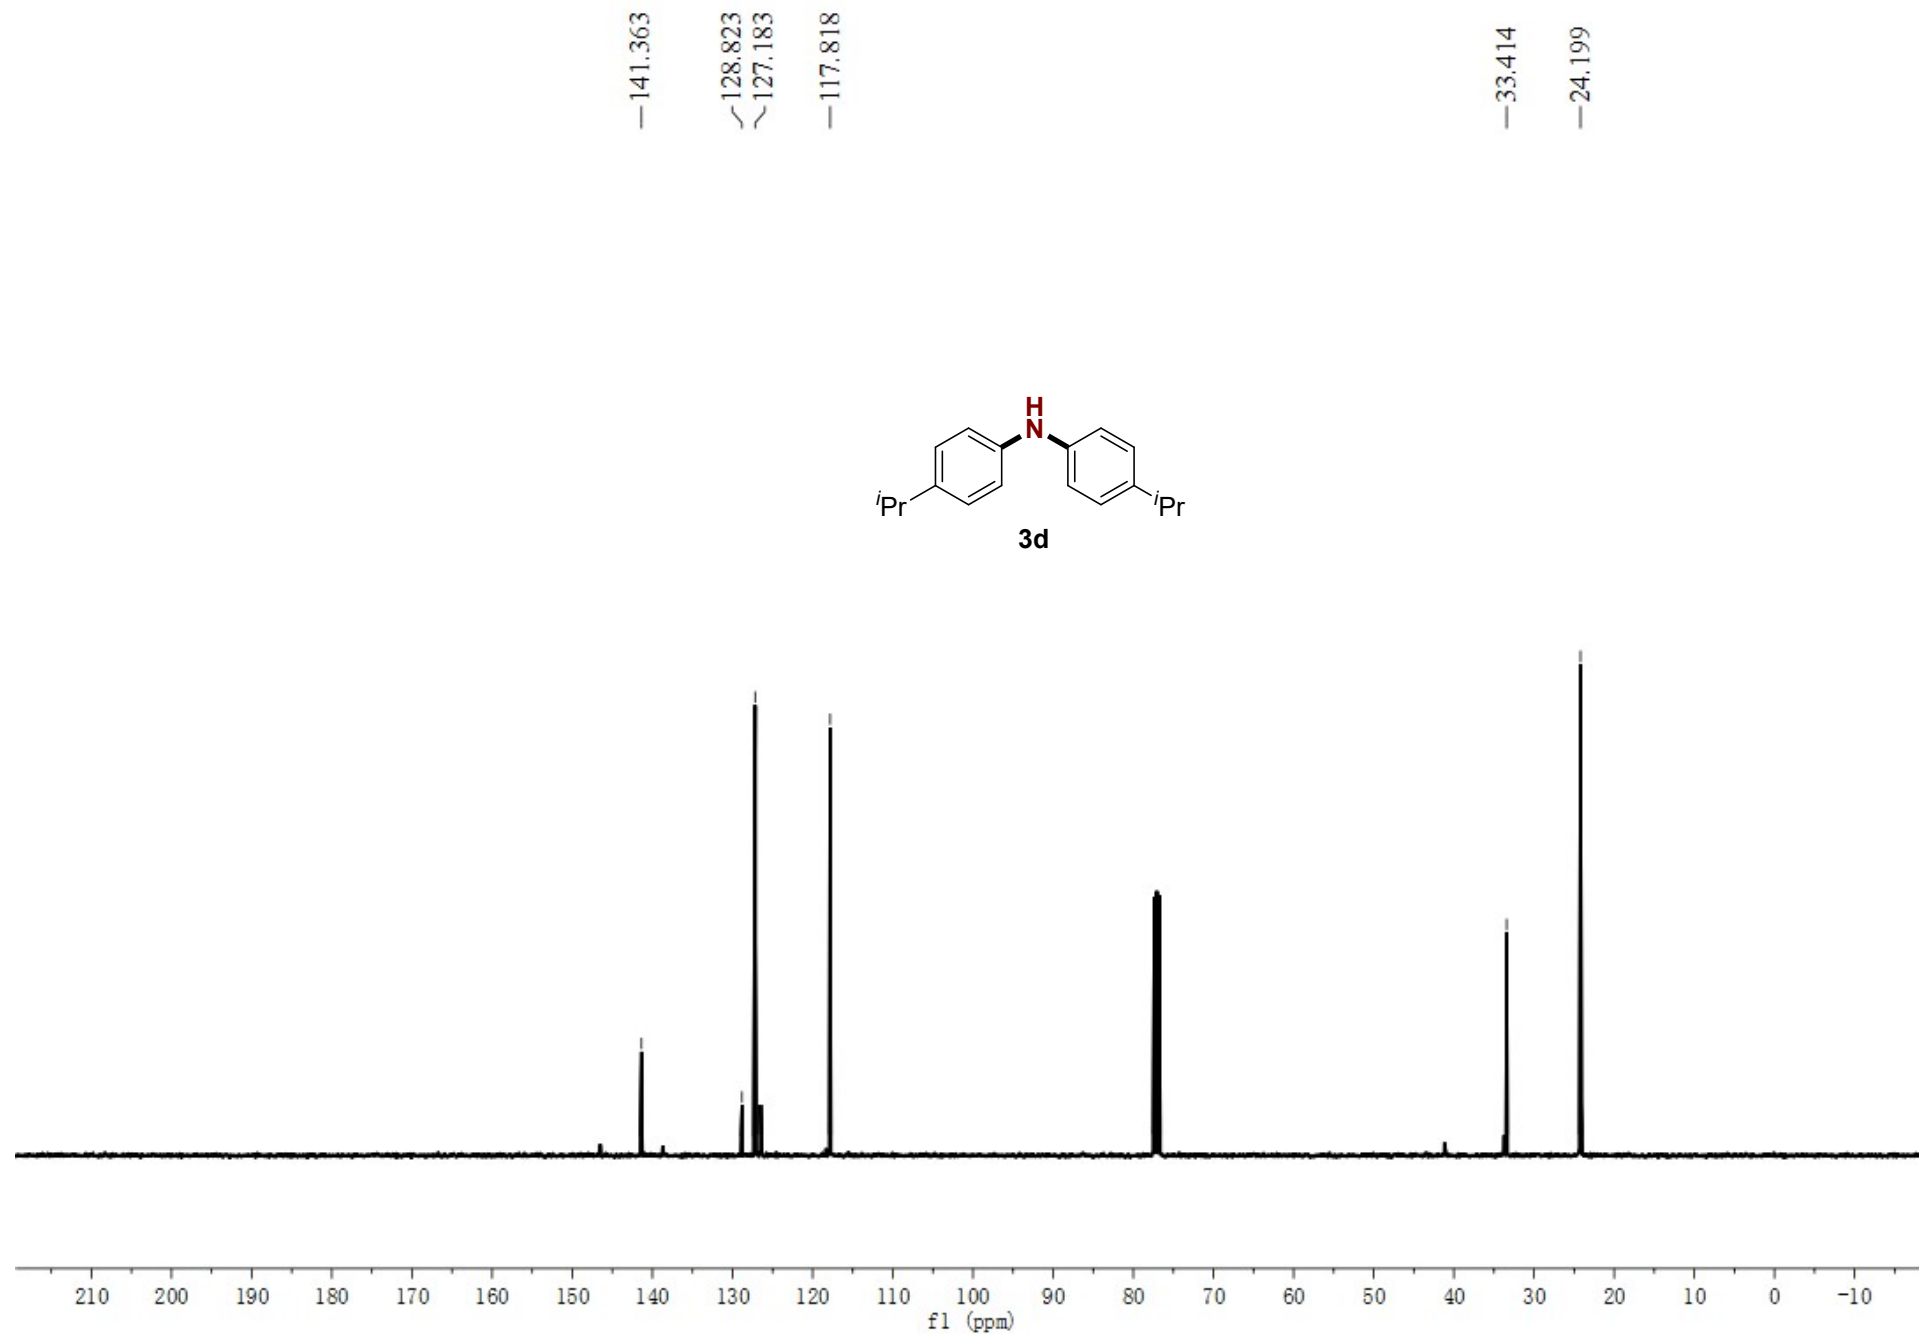

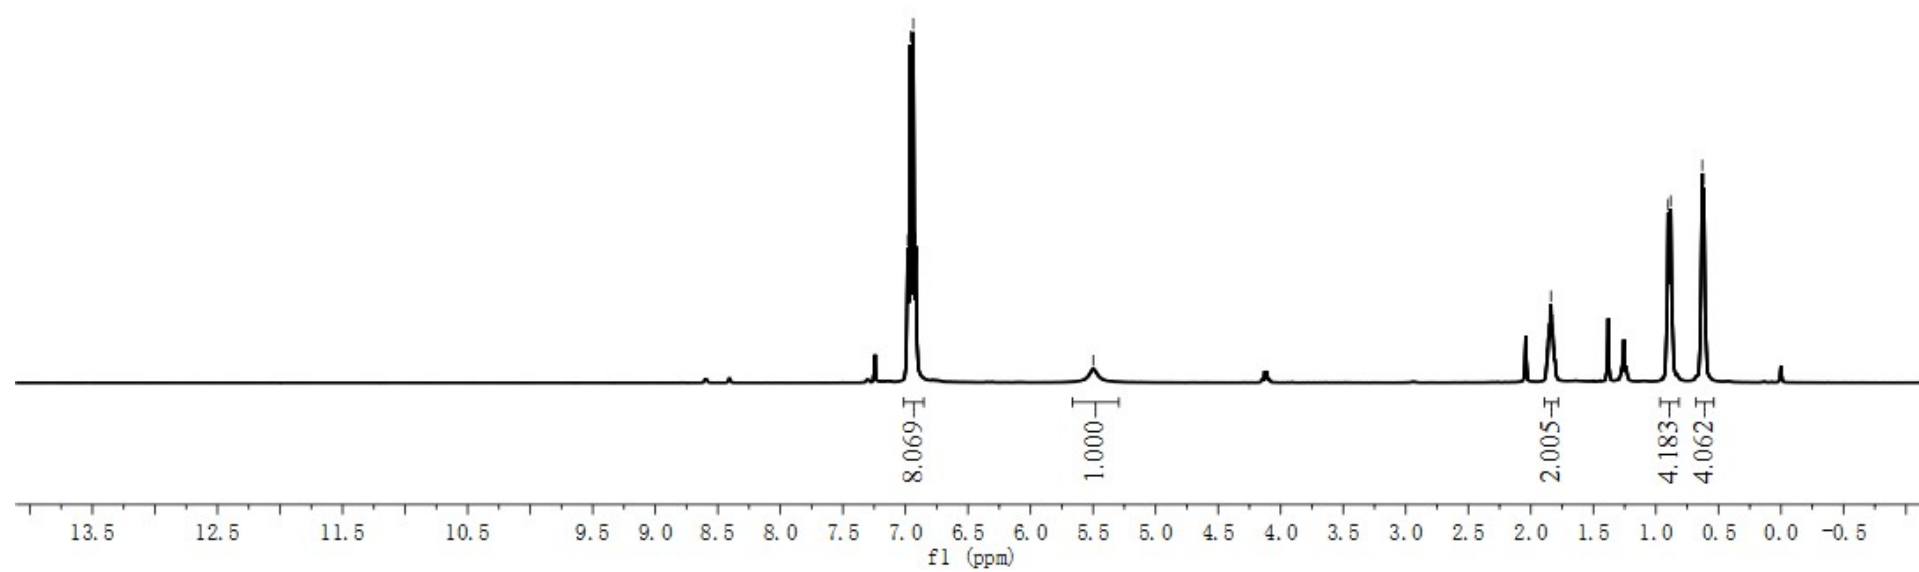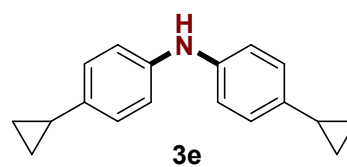

6.981  
6.960  
6.938  
6.917

5.499

1.873  
1.860  
1.851  
1.839  
1.827  
1.819  
1.806  
0.914  
0.902  
0.882  
0.867  
0.640  
0.629  
0.617  
0.602

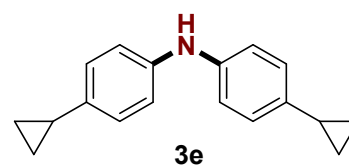

—141.202  
—136.219  
—126.706  
—117.932

—14.791  
—8.579

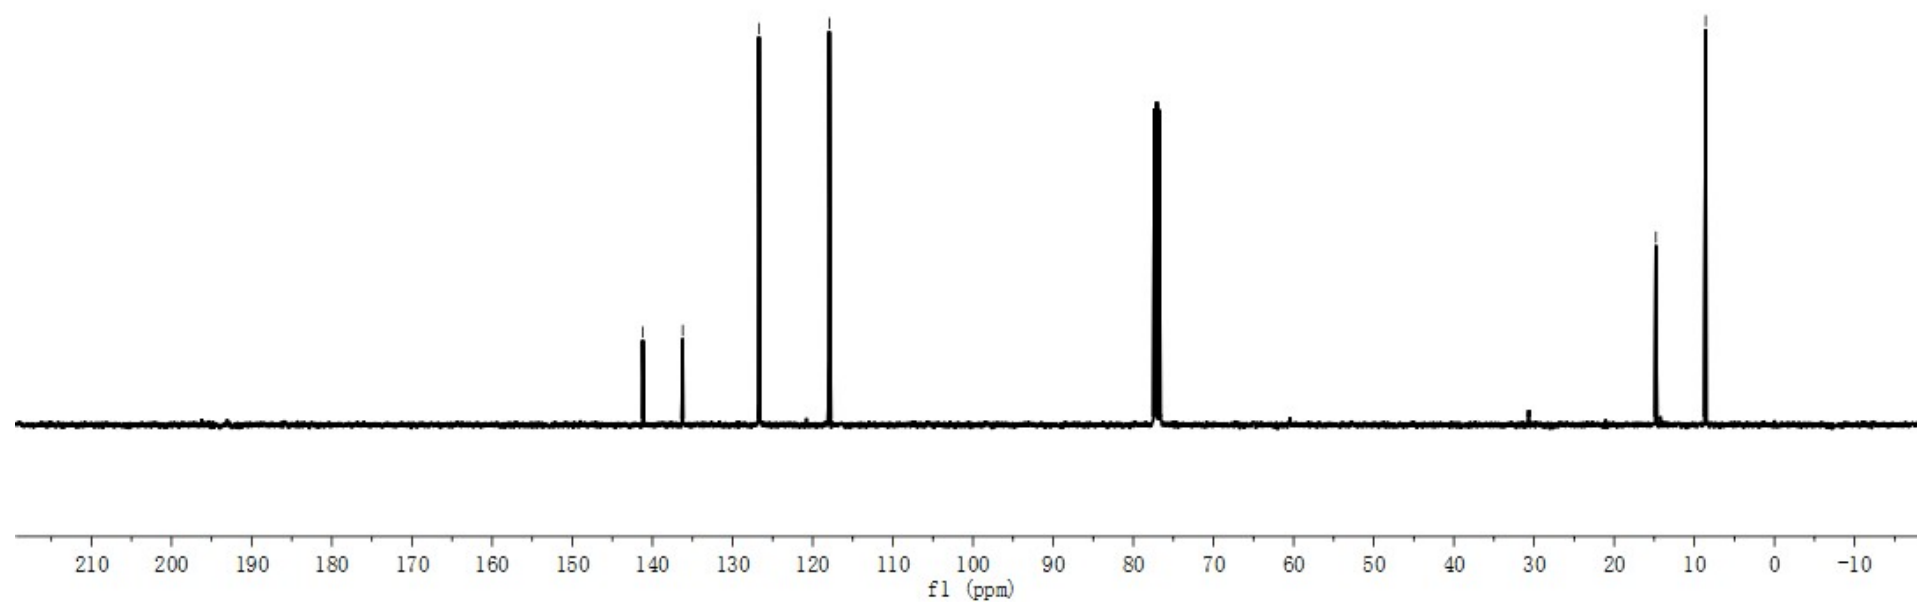

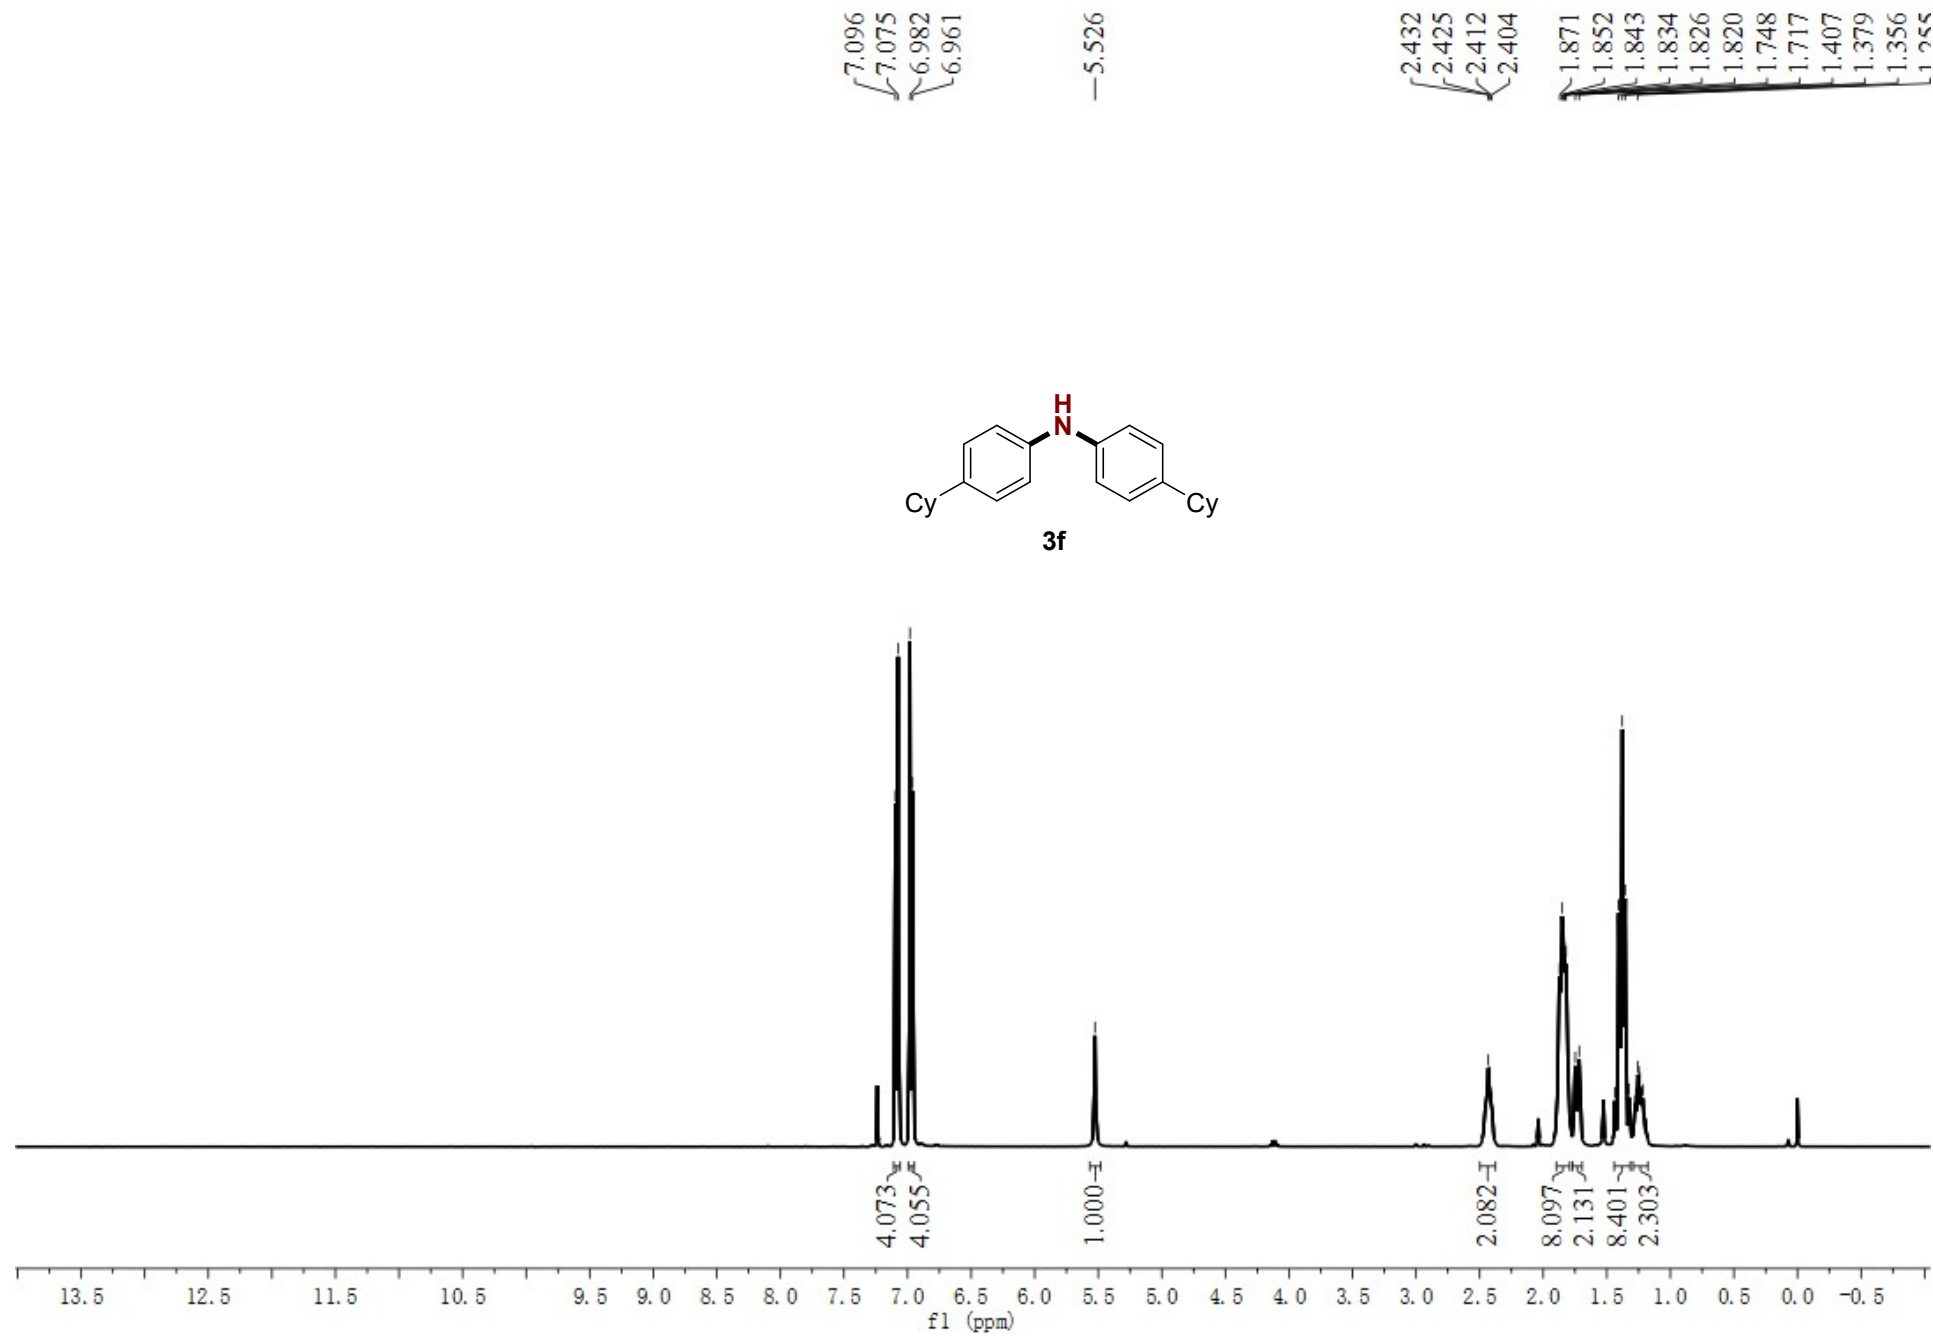

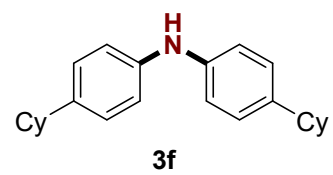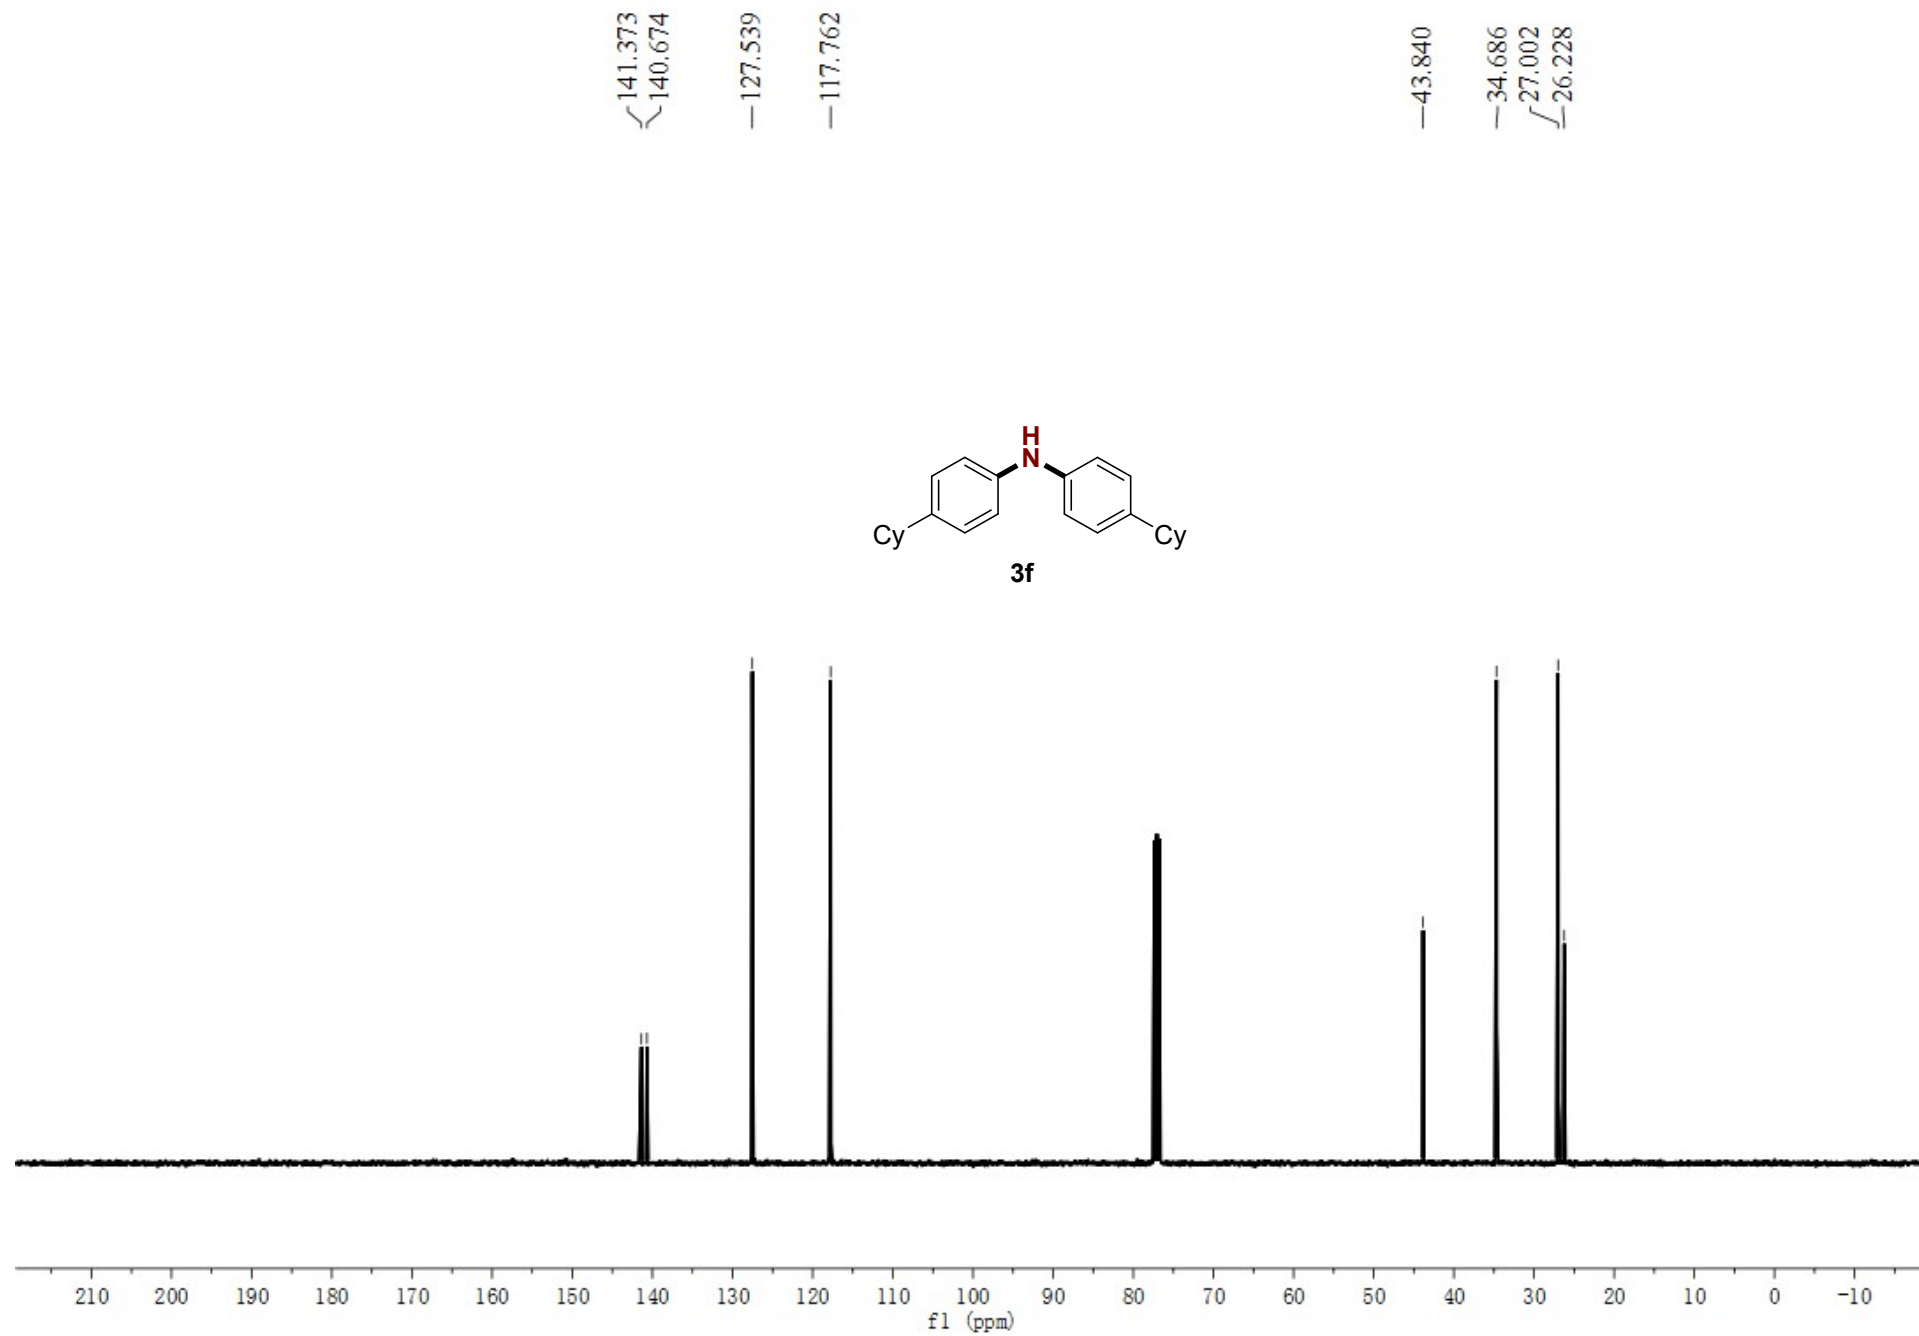

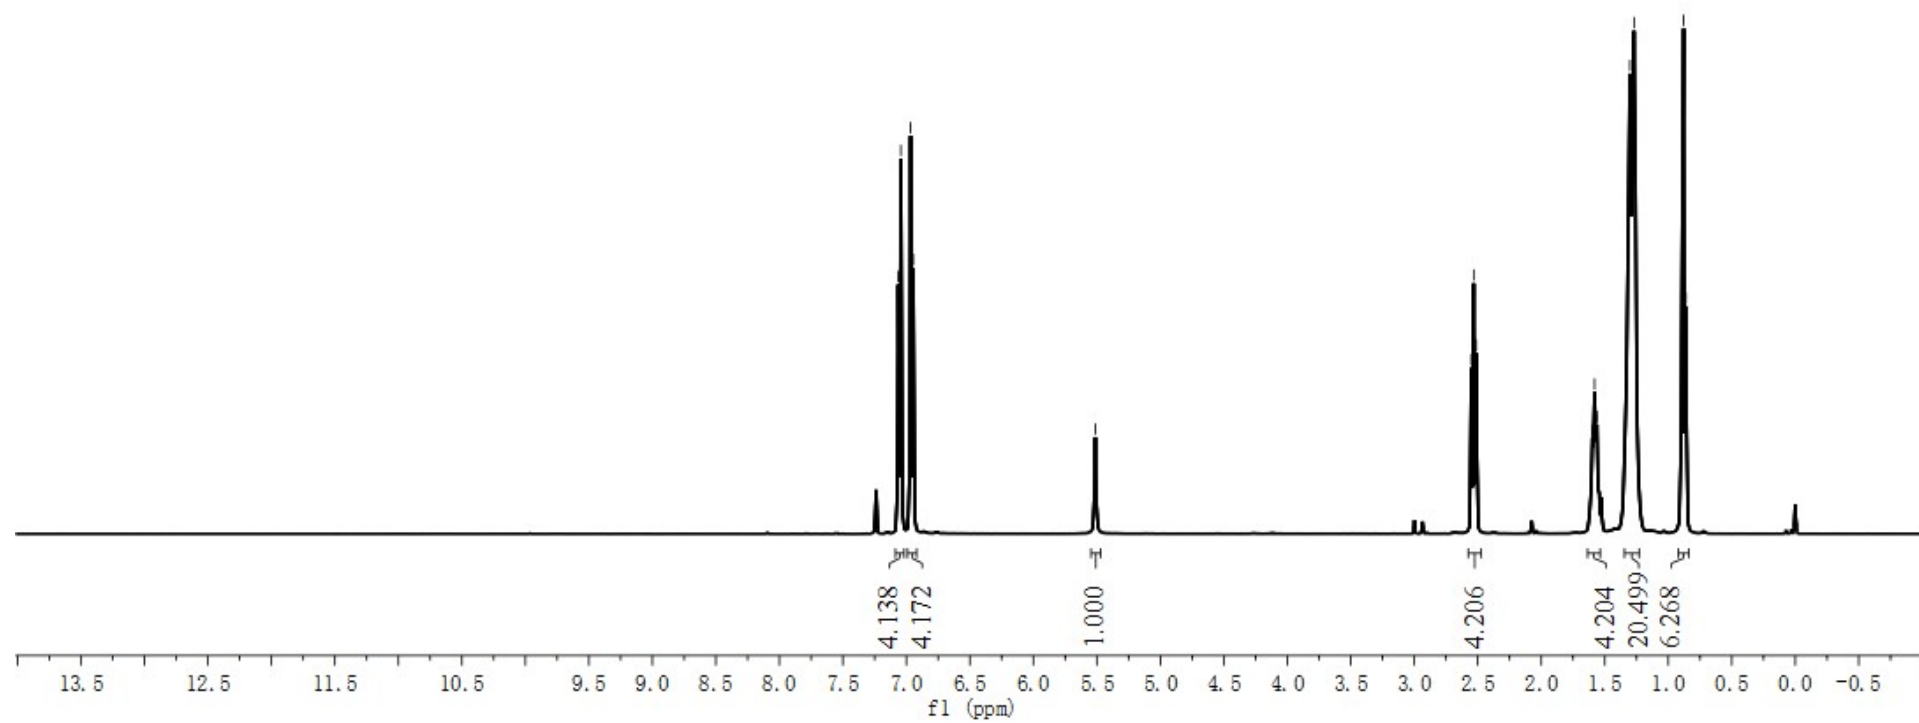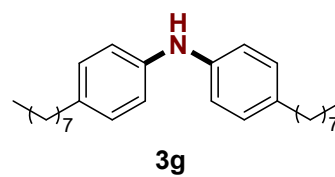

7.064  
7.043  
6.967  
6.946

5.512

2.551  
2.532  
2.512  
1.598  
1.581  
1.562  
1.544  
1.303  
1.270  
0.895  
0.879  
0.861

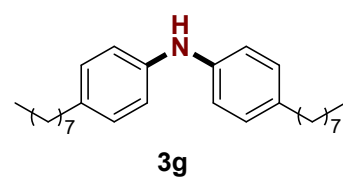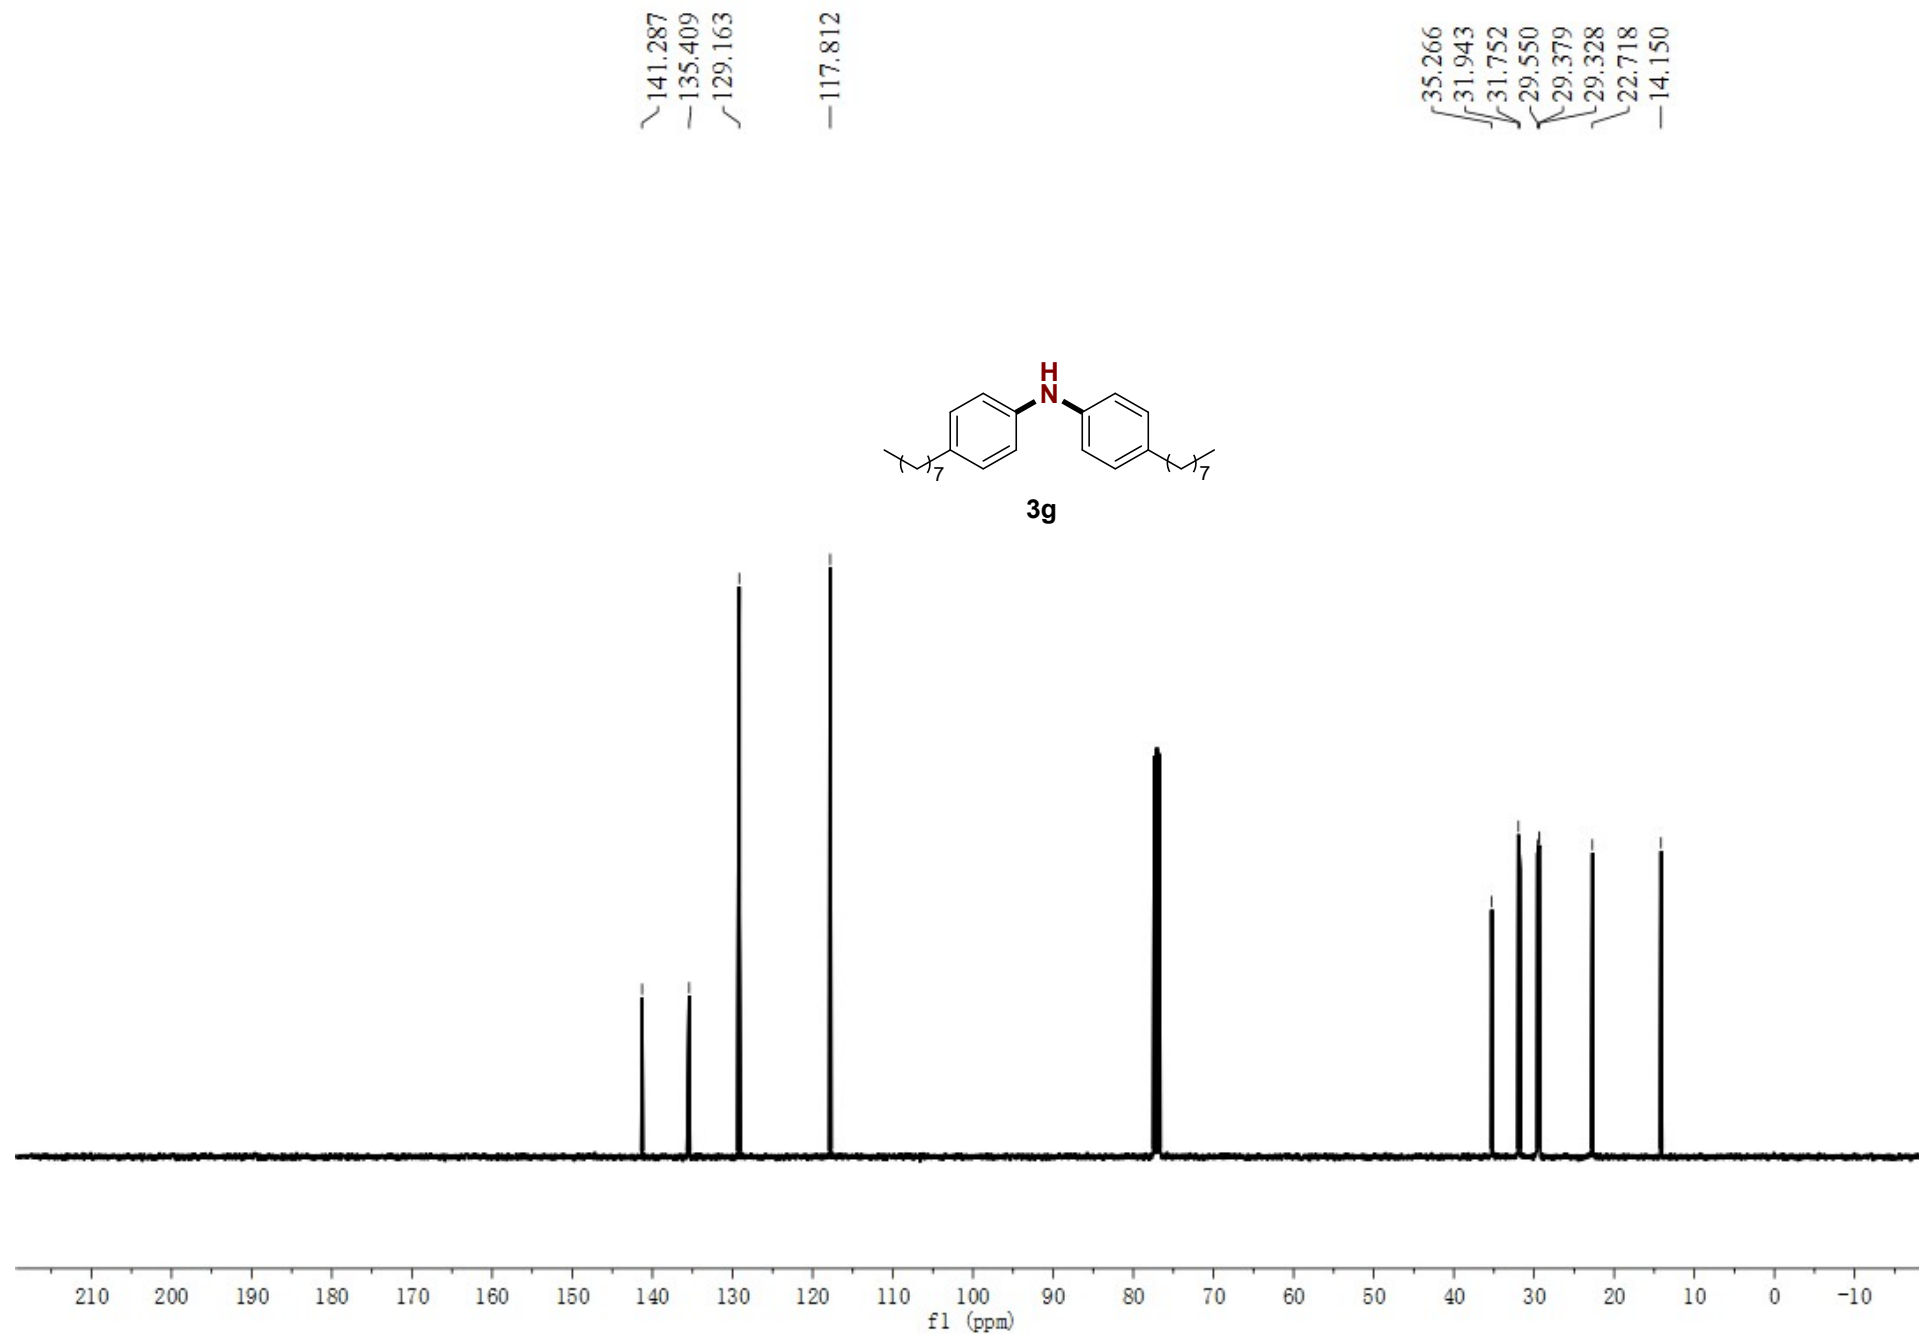

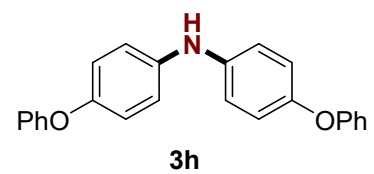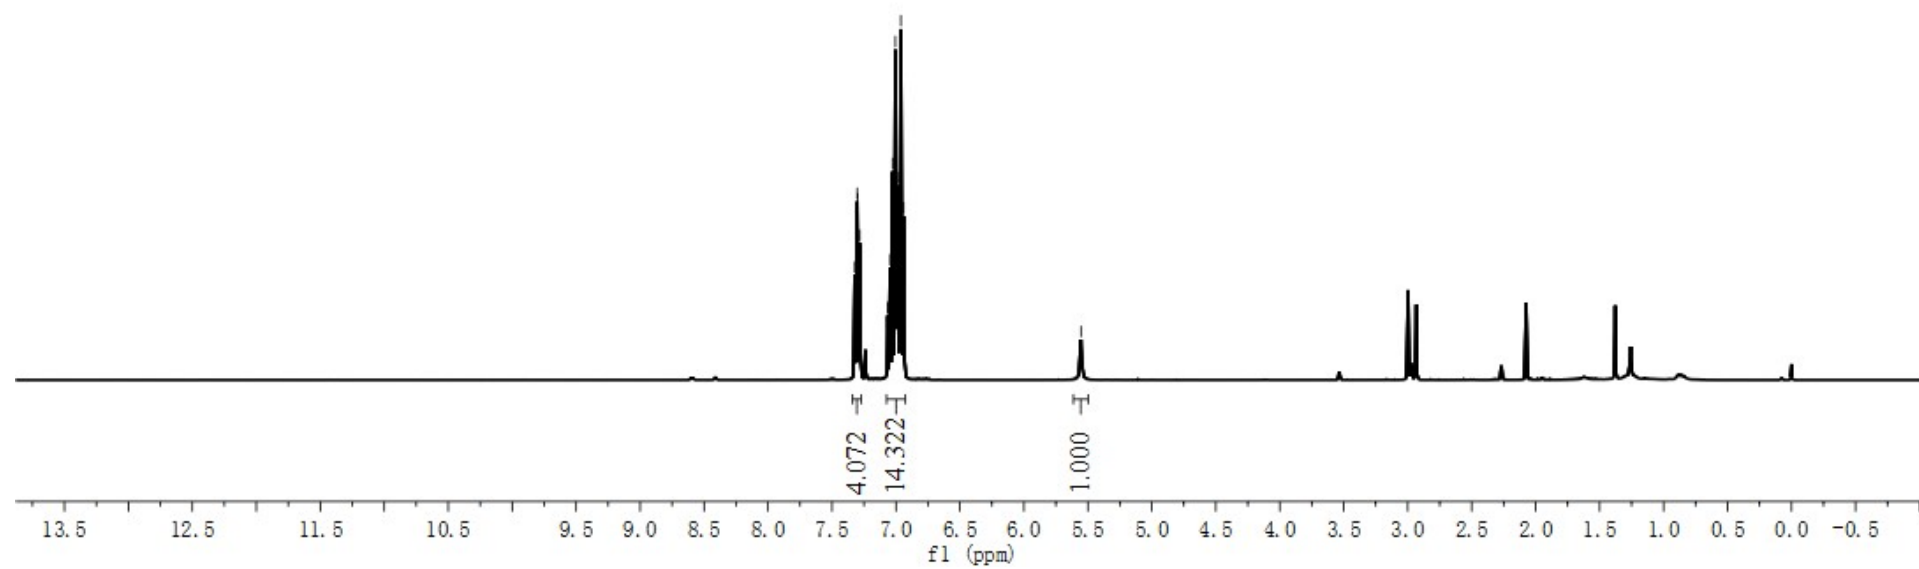

7.322  
 7.318  
 7.303  
 7.301  
 7.282  
 7.277  
 7.064  
 7.046  
 7.027  
 7.022  
 7.010  
 7.005  
 6.997  
 6.988  
 6.968  
 6.962  
 6.956  
 6.945  
 6.939  
 6.932  
 — 5.554

—158.310  
 —150.767  
 —139.693  
 ✓129.670  
 ✓122.591  
 ✓120.696  
 ✓119.317  
 ✓117.843

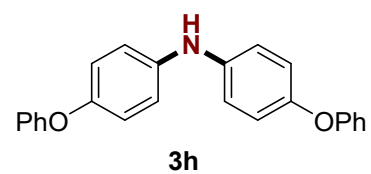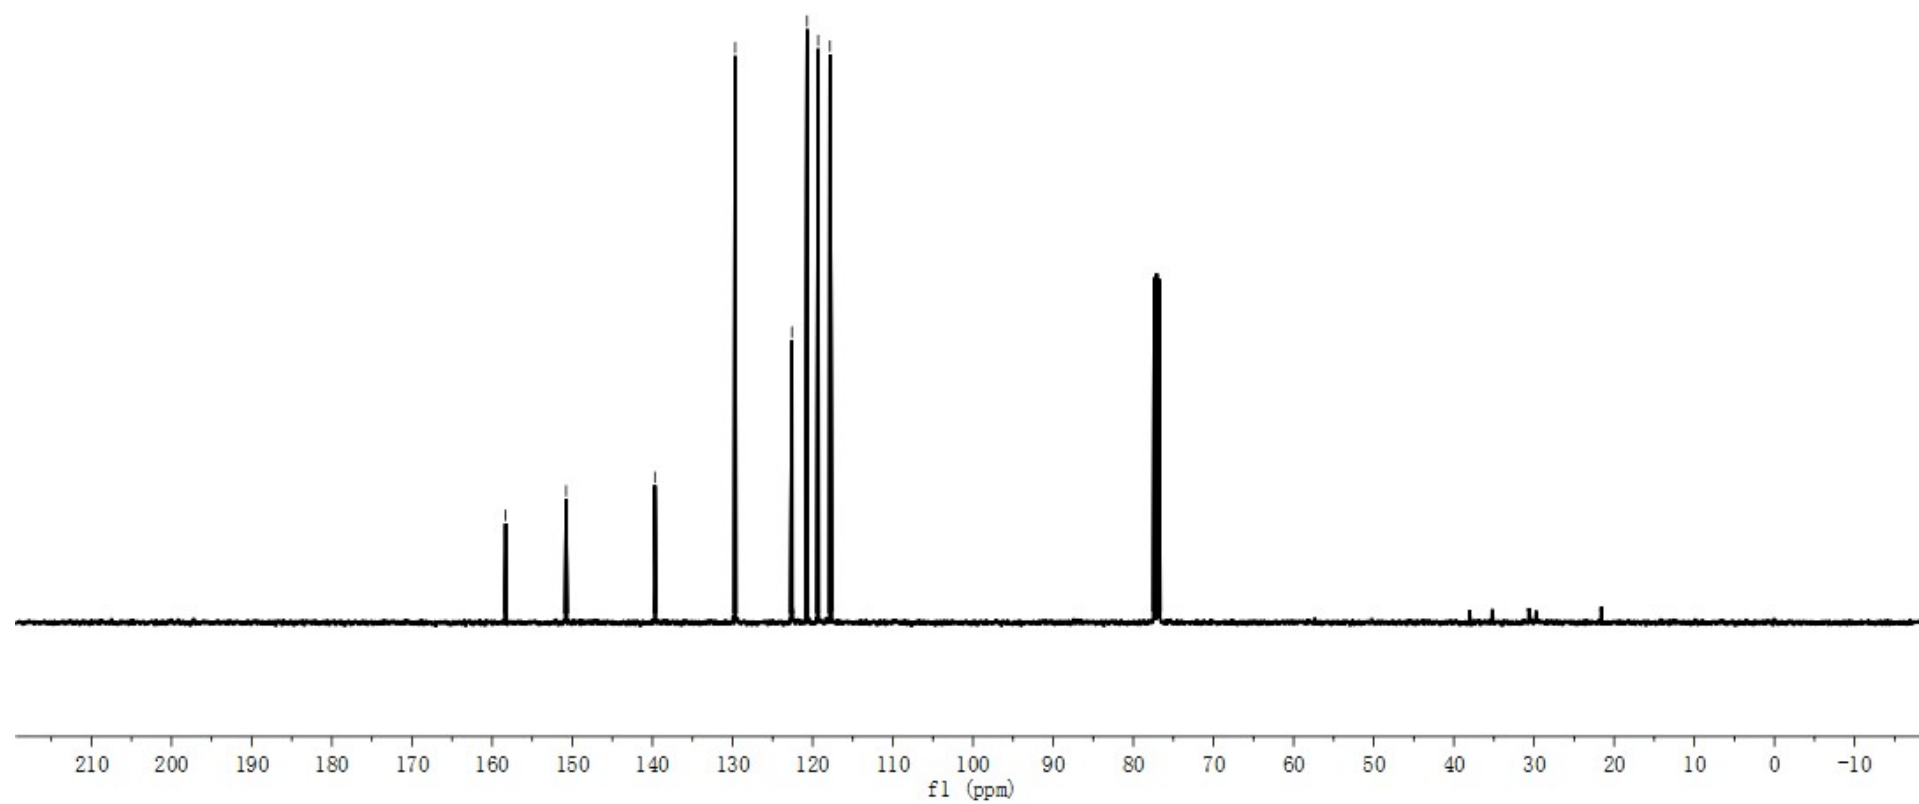

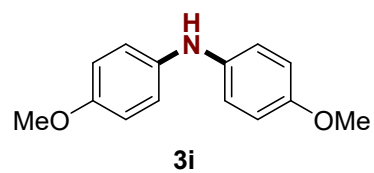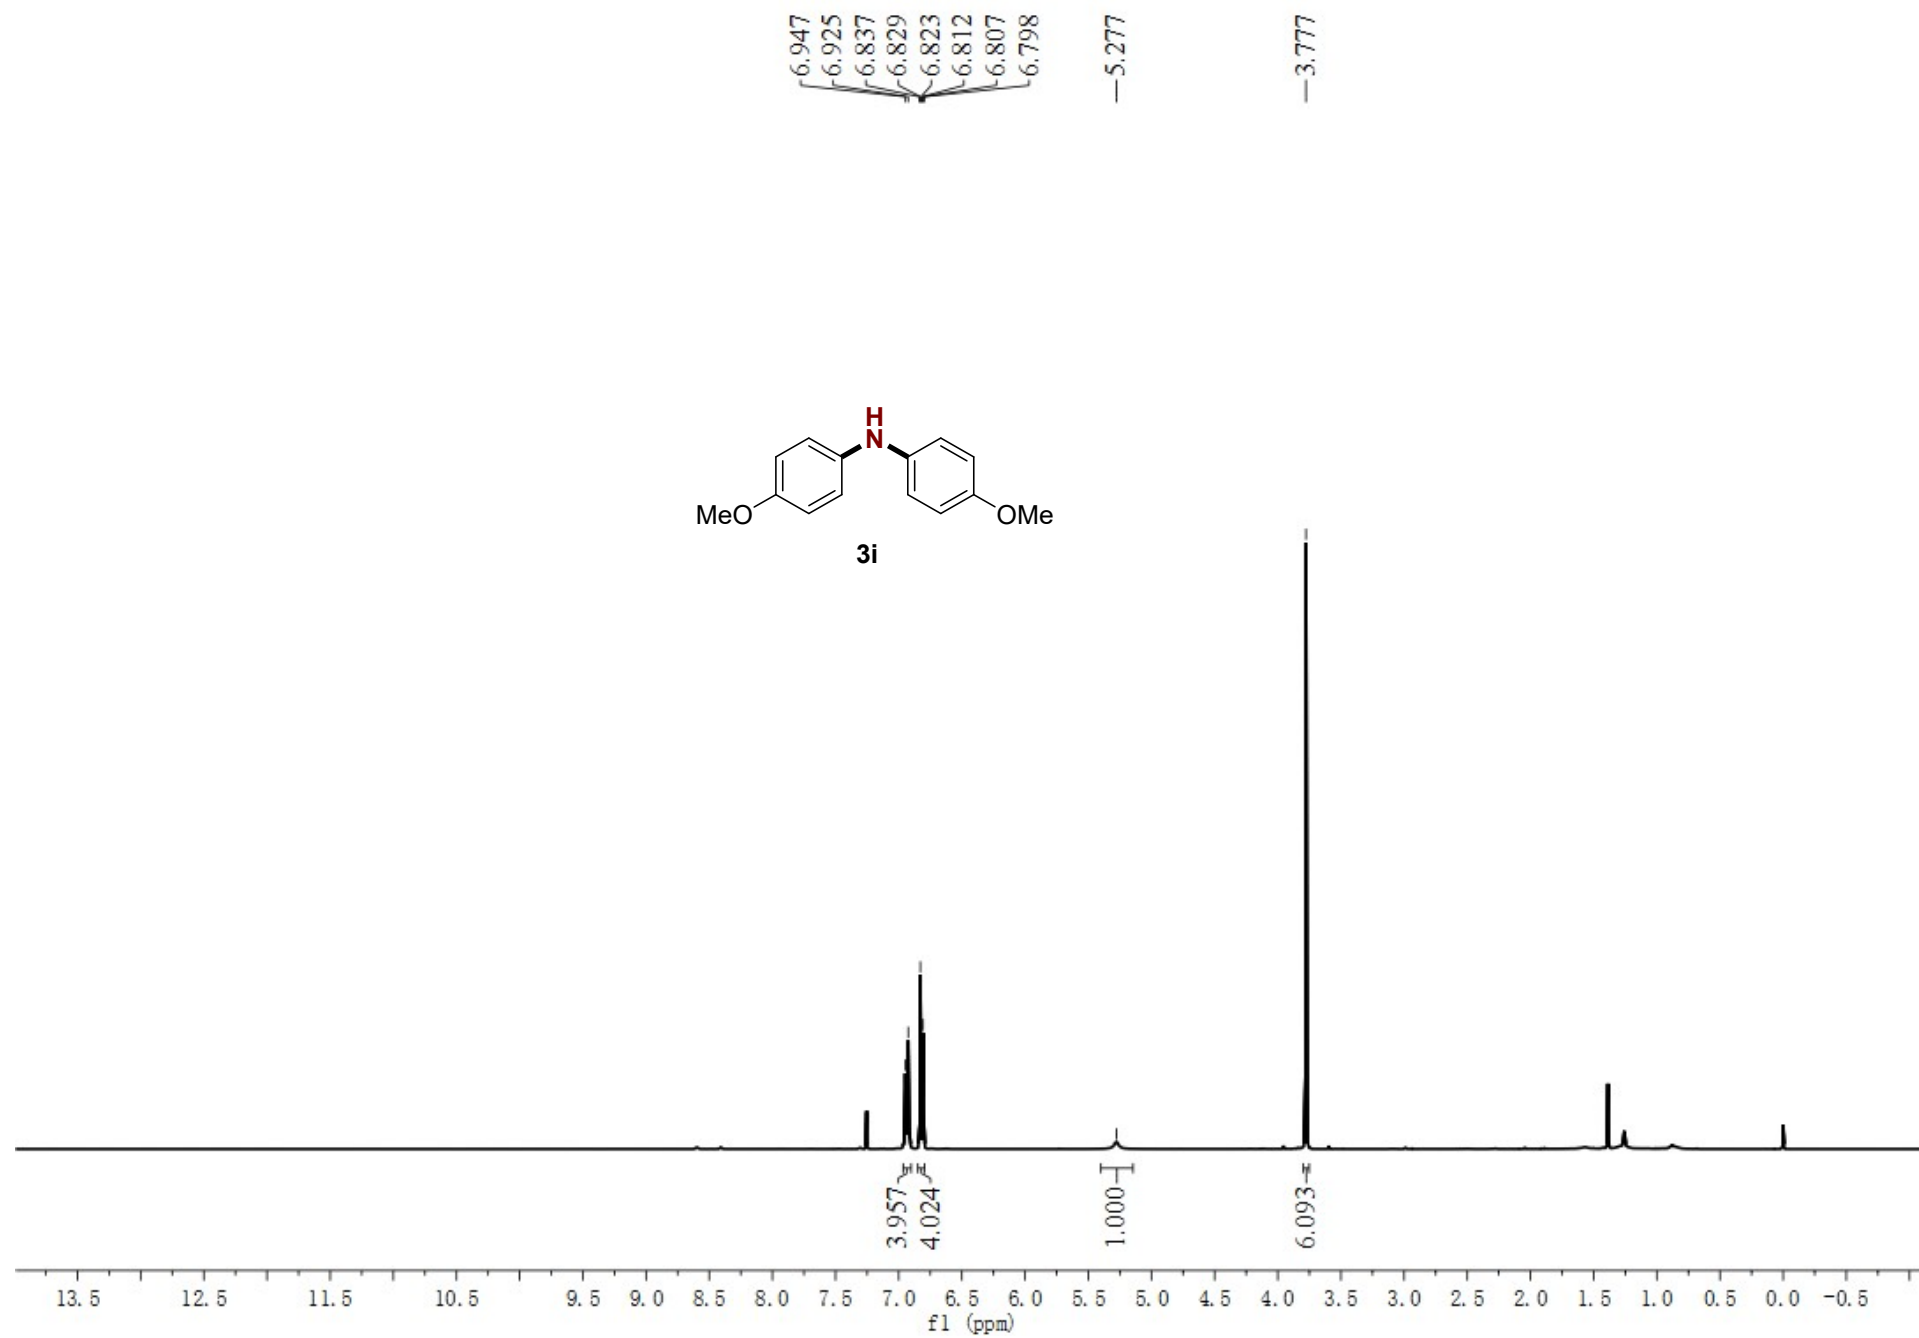

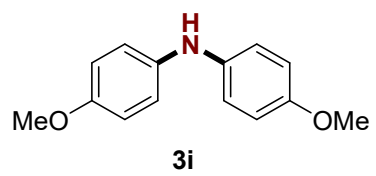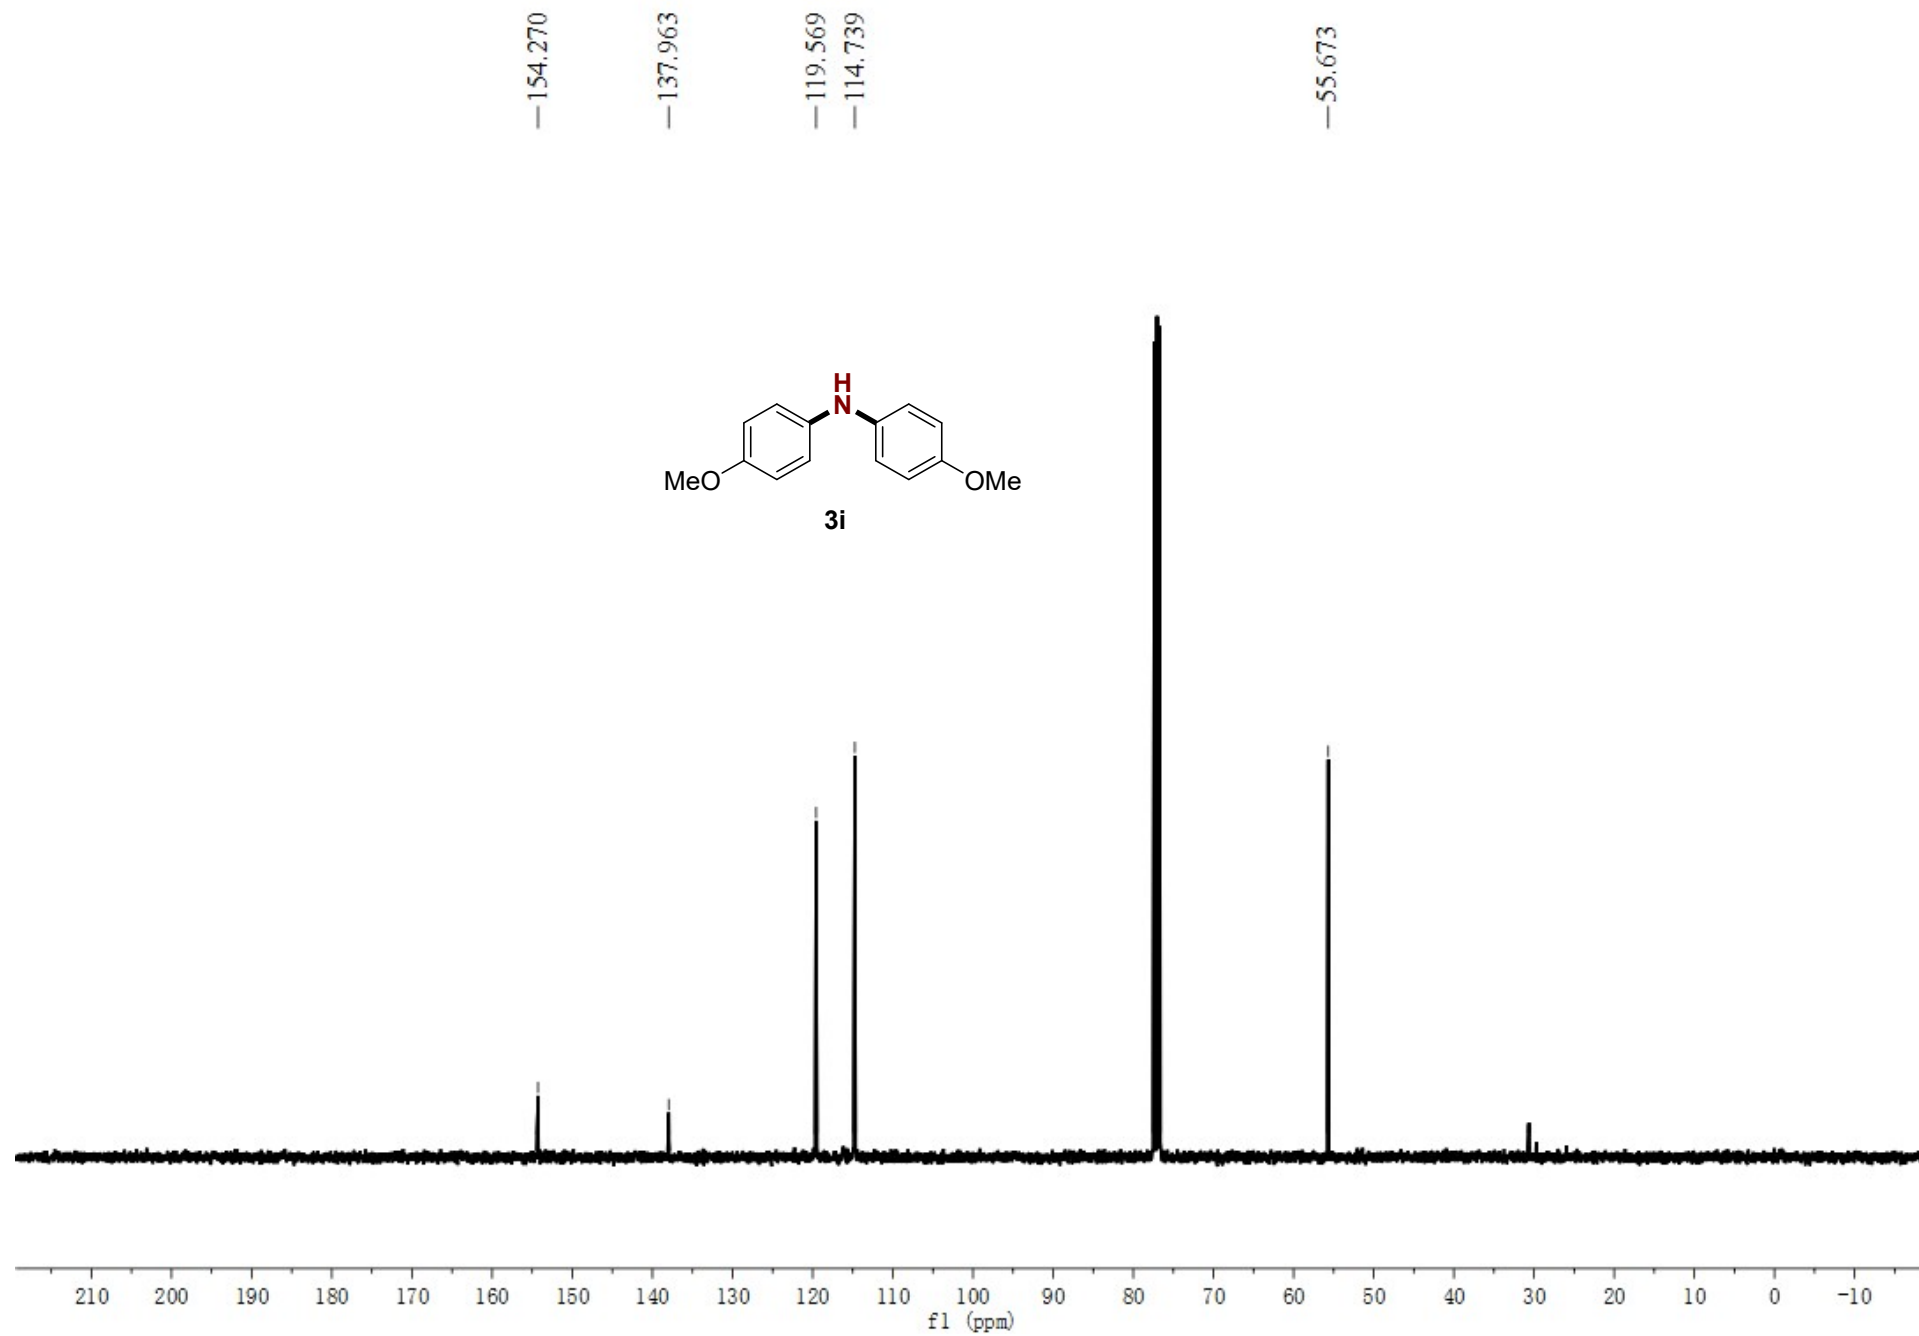

7.280  
7.261  
7.260  
7.240  
7.079  
7.077  
7.058  
6.941  
6.923  
6.904  
— 5.680

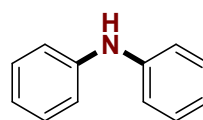

3j

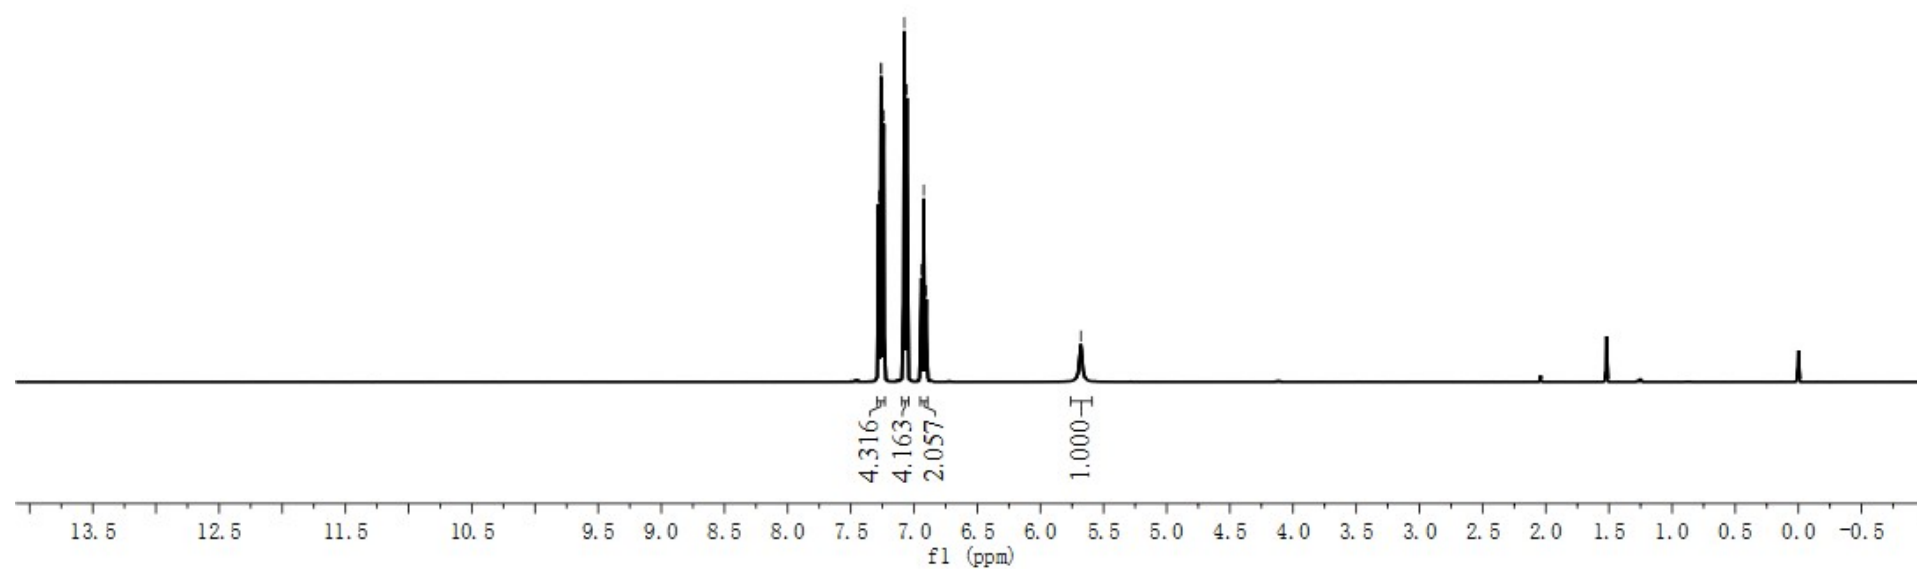

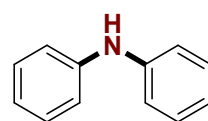

3j

— 143.146  
— 129.370  
— 121.026  
— 117.839

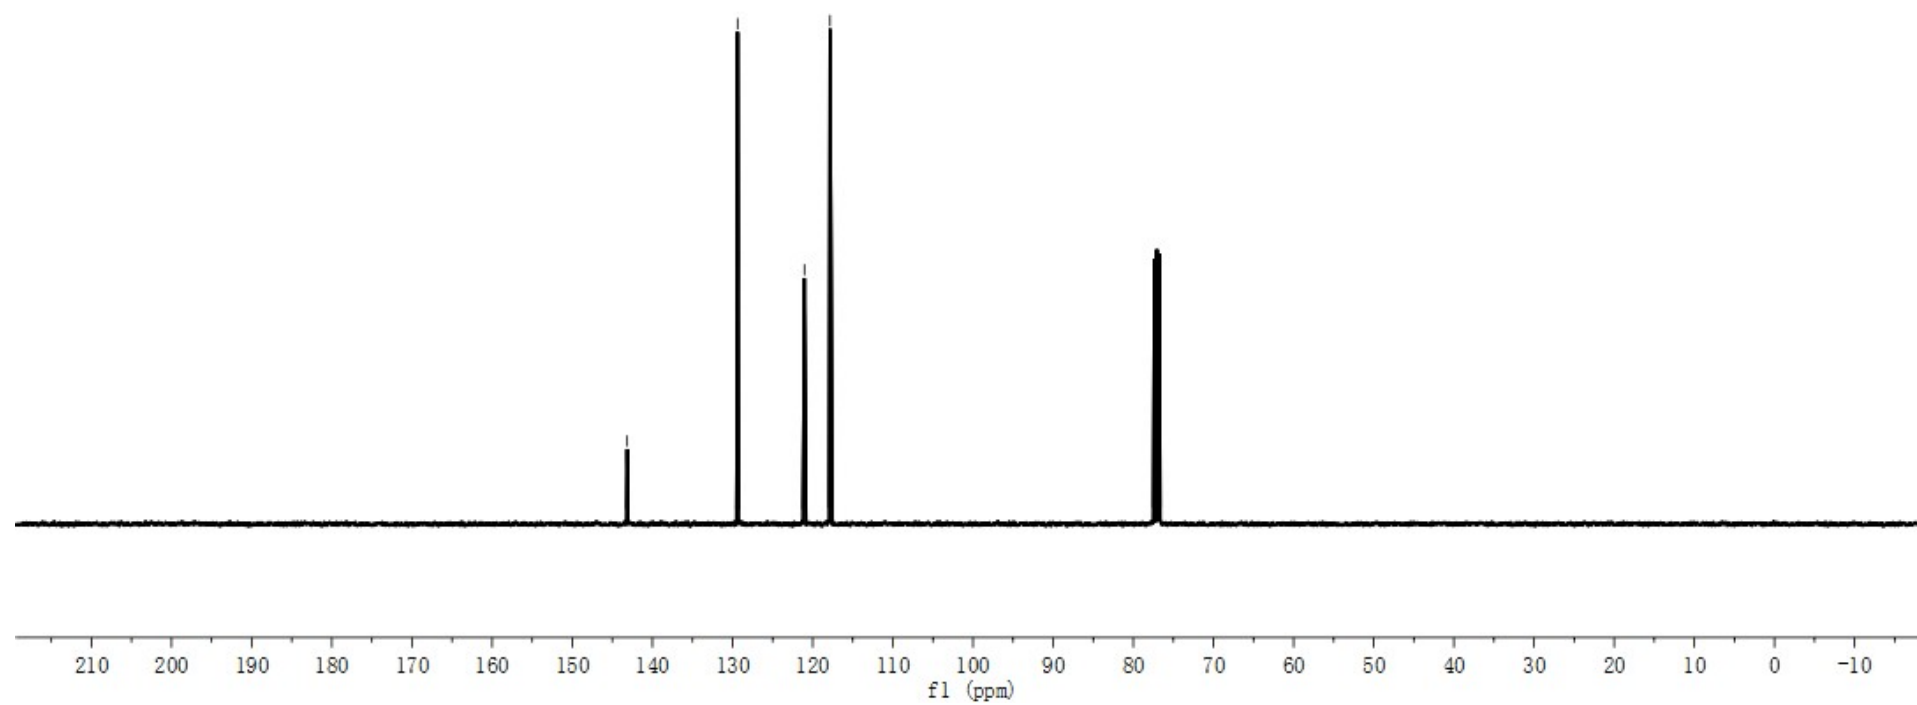

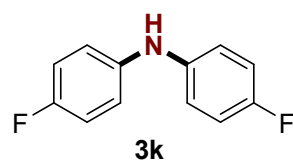

6.960  
6.945

5.457

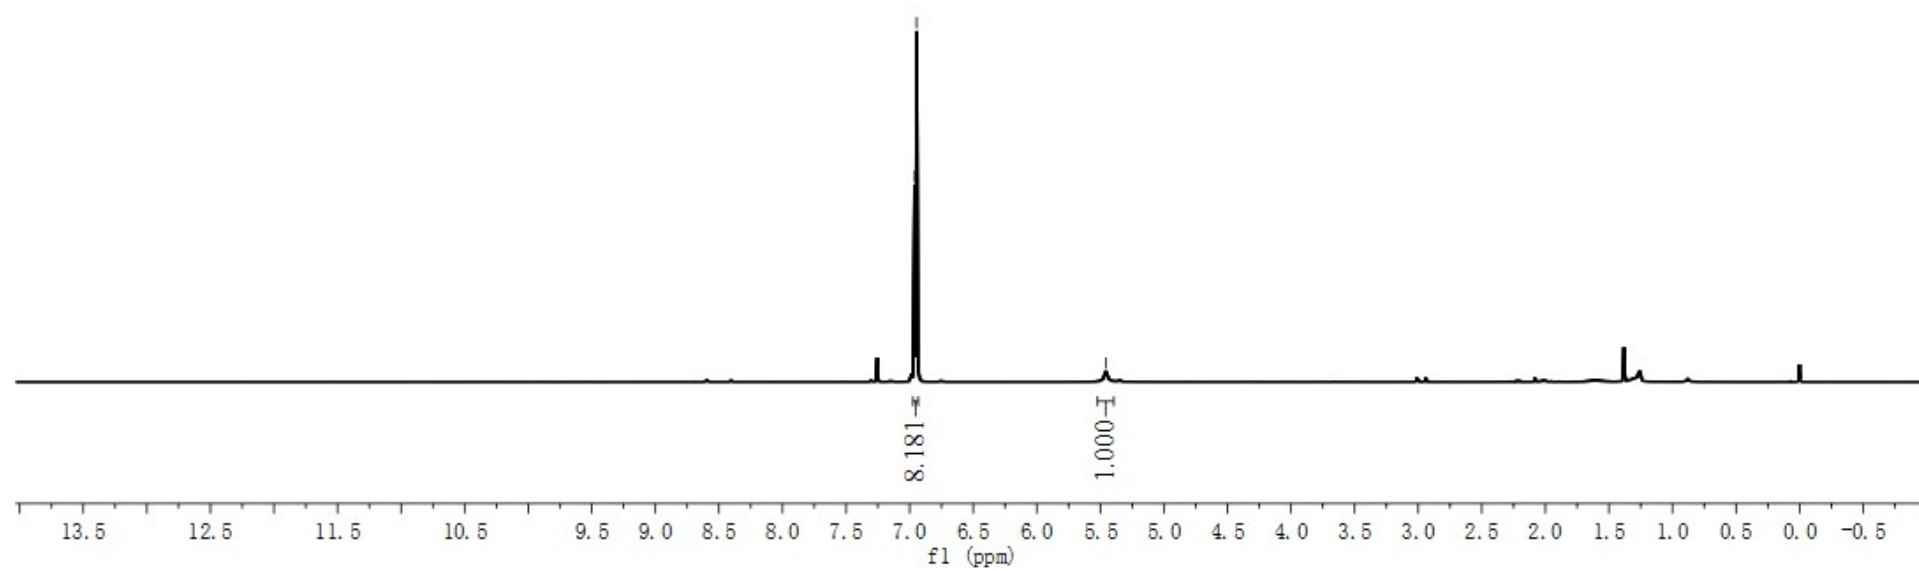

~158.997  
~156.614

139.808  
139.785

119.463  
119.386  
116.103  
115.879

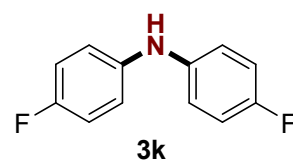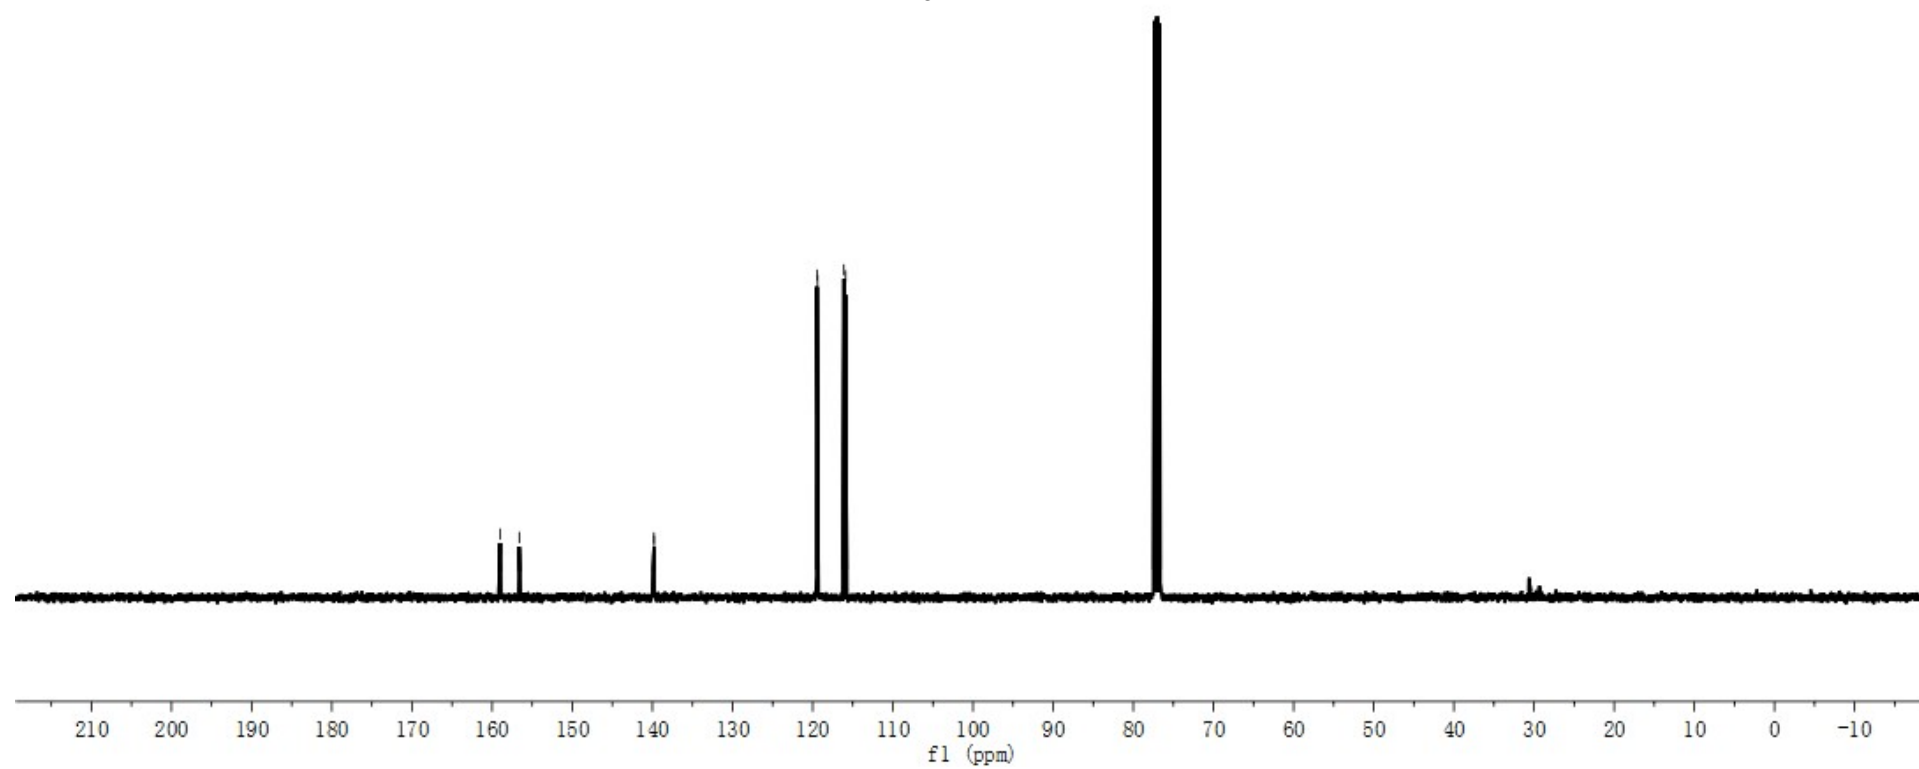

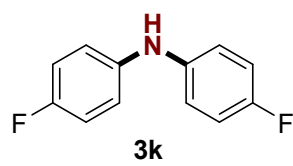

—122.629

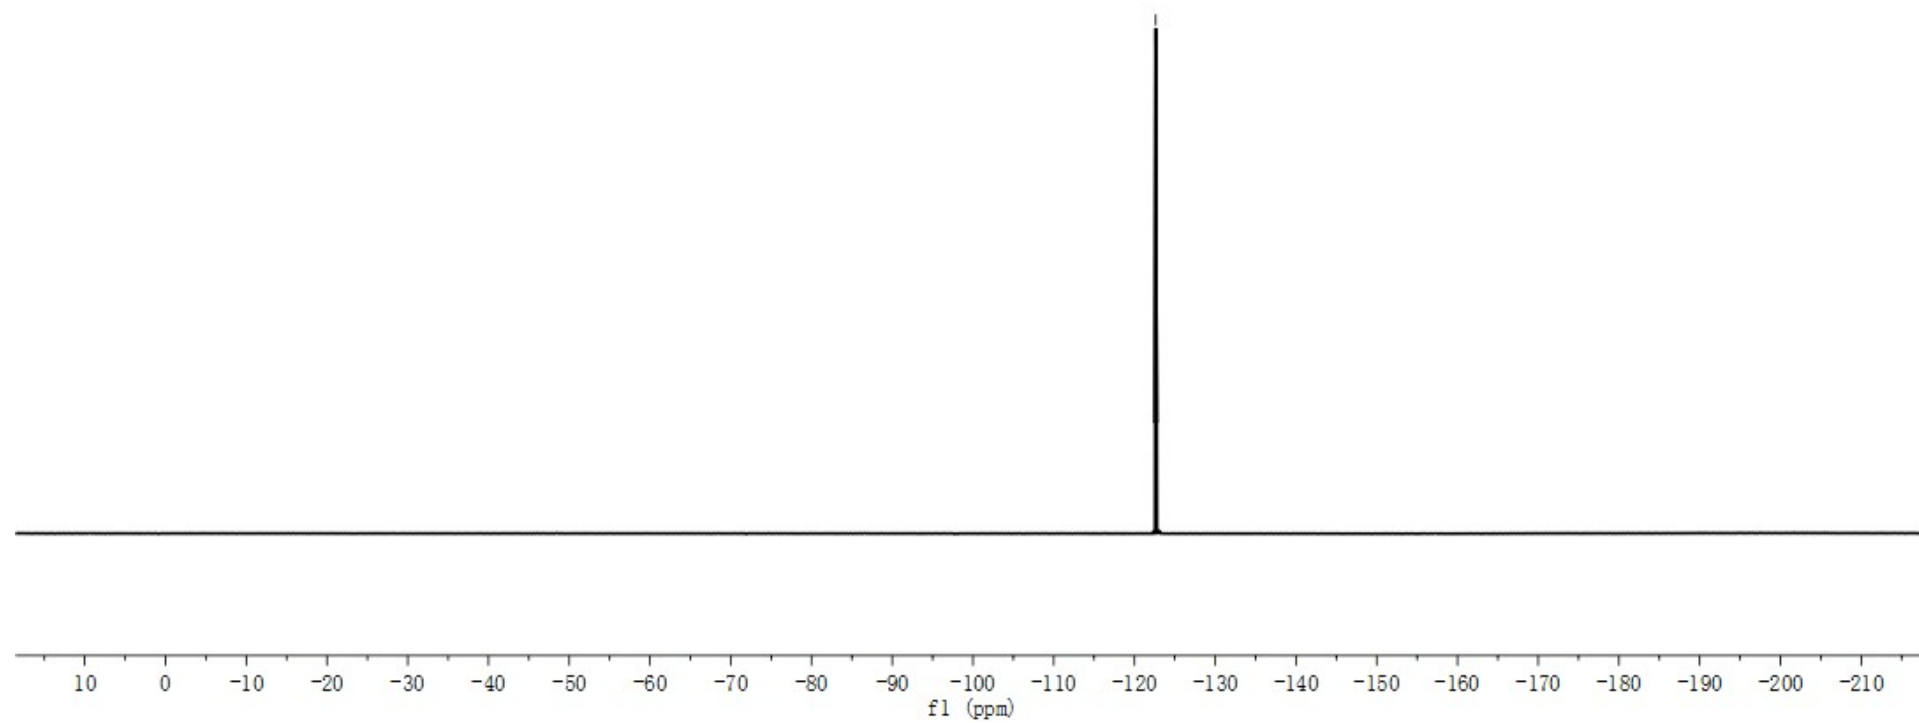

7.256  
7.235  
6.998  
6.976  
5.663

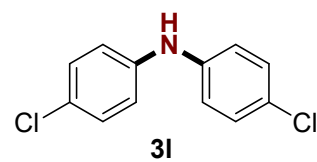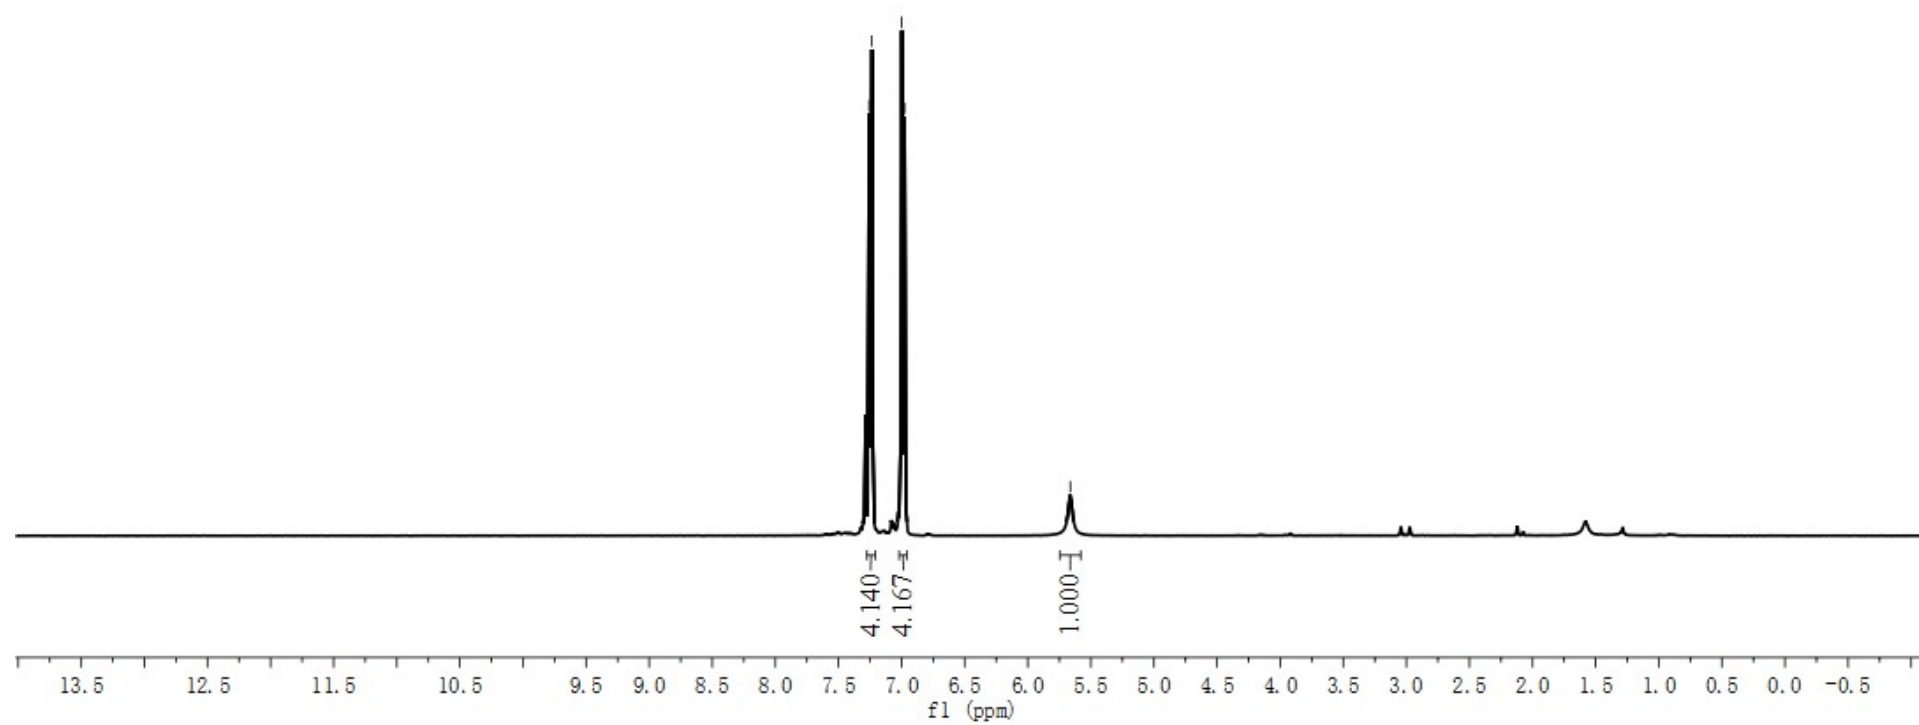

—141.408  
~129.415  
~126.105  
~119.137

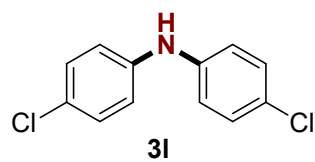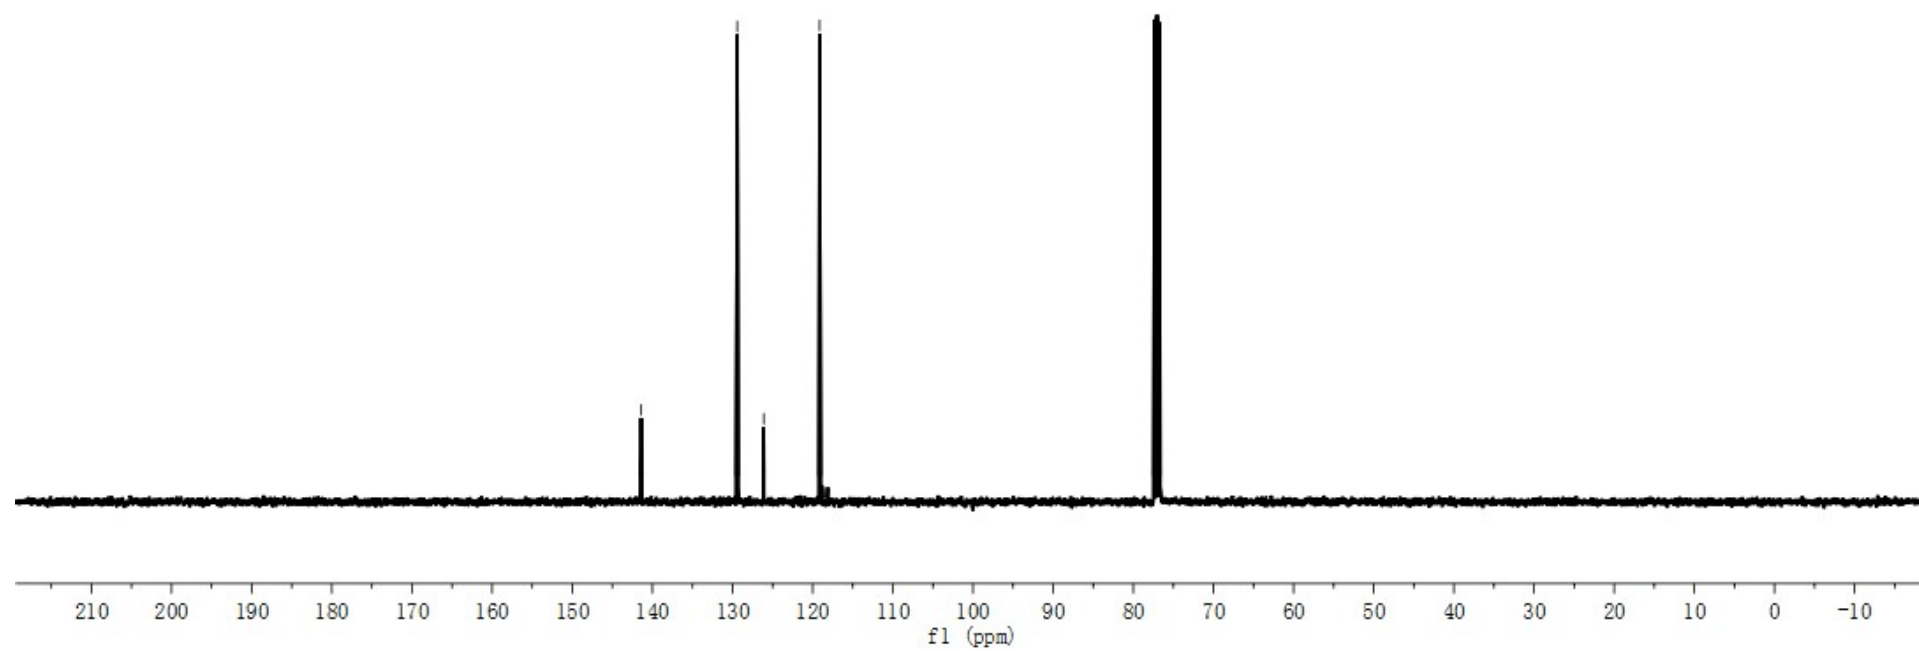

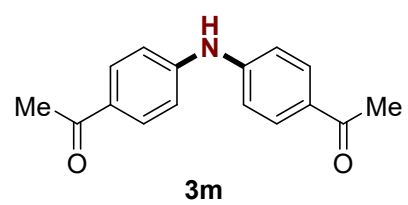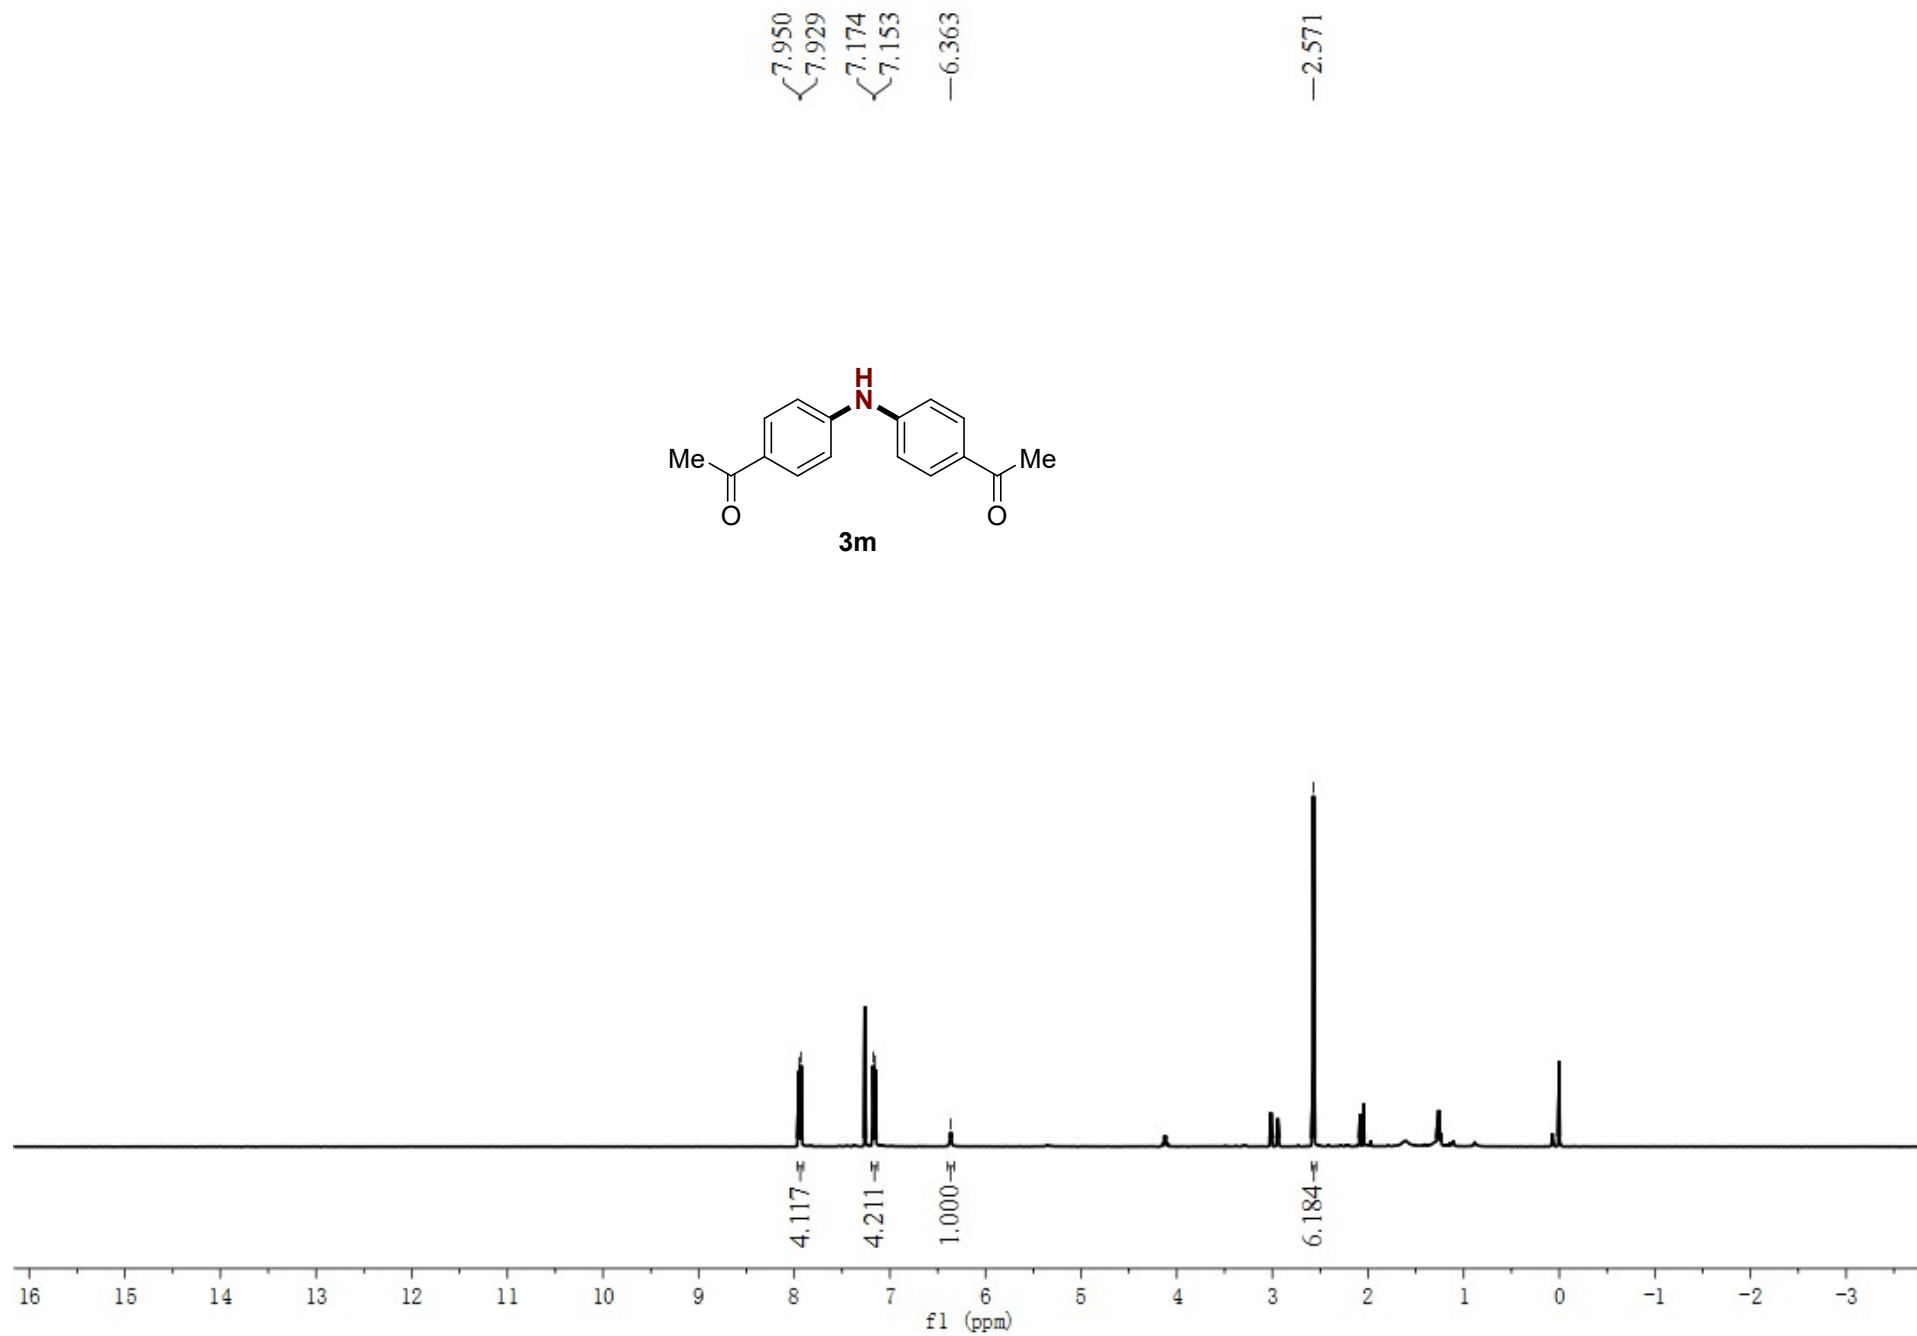

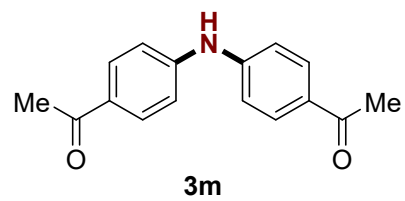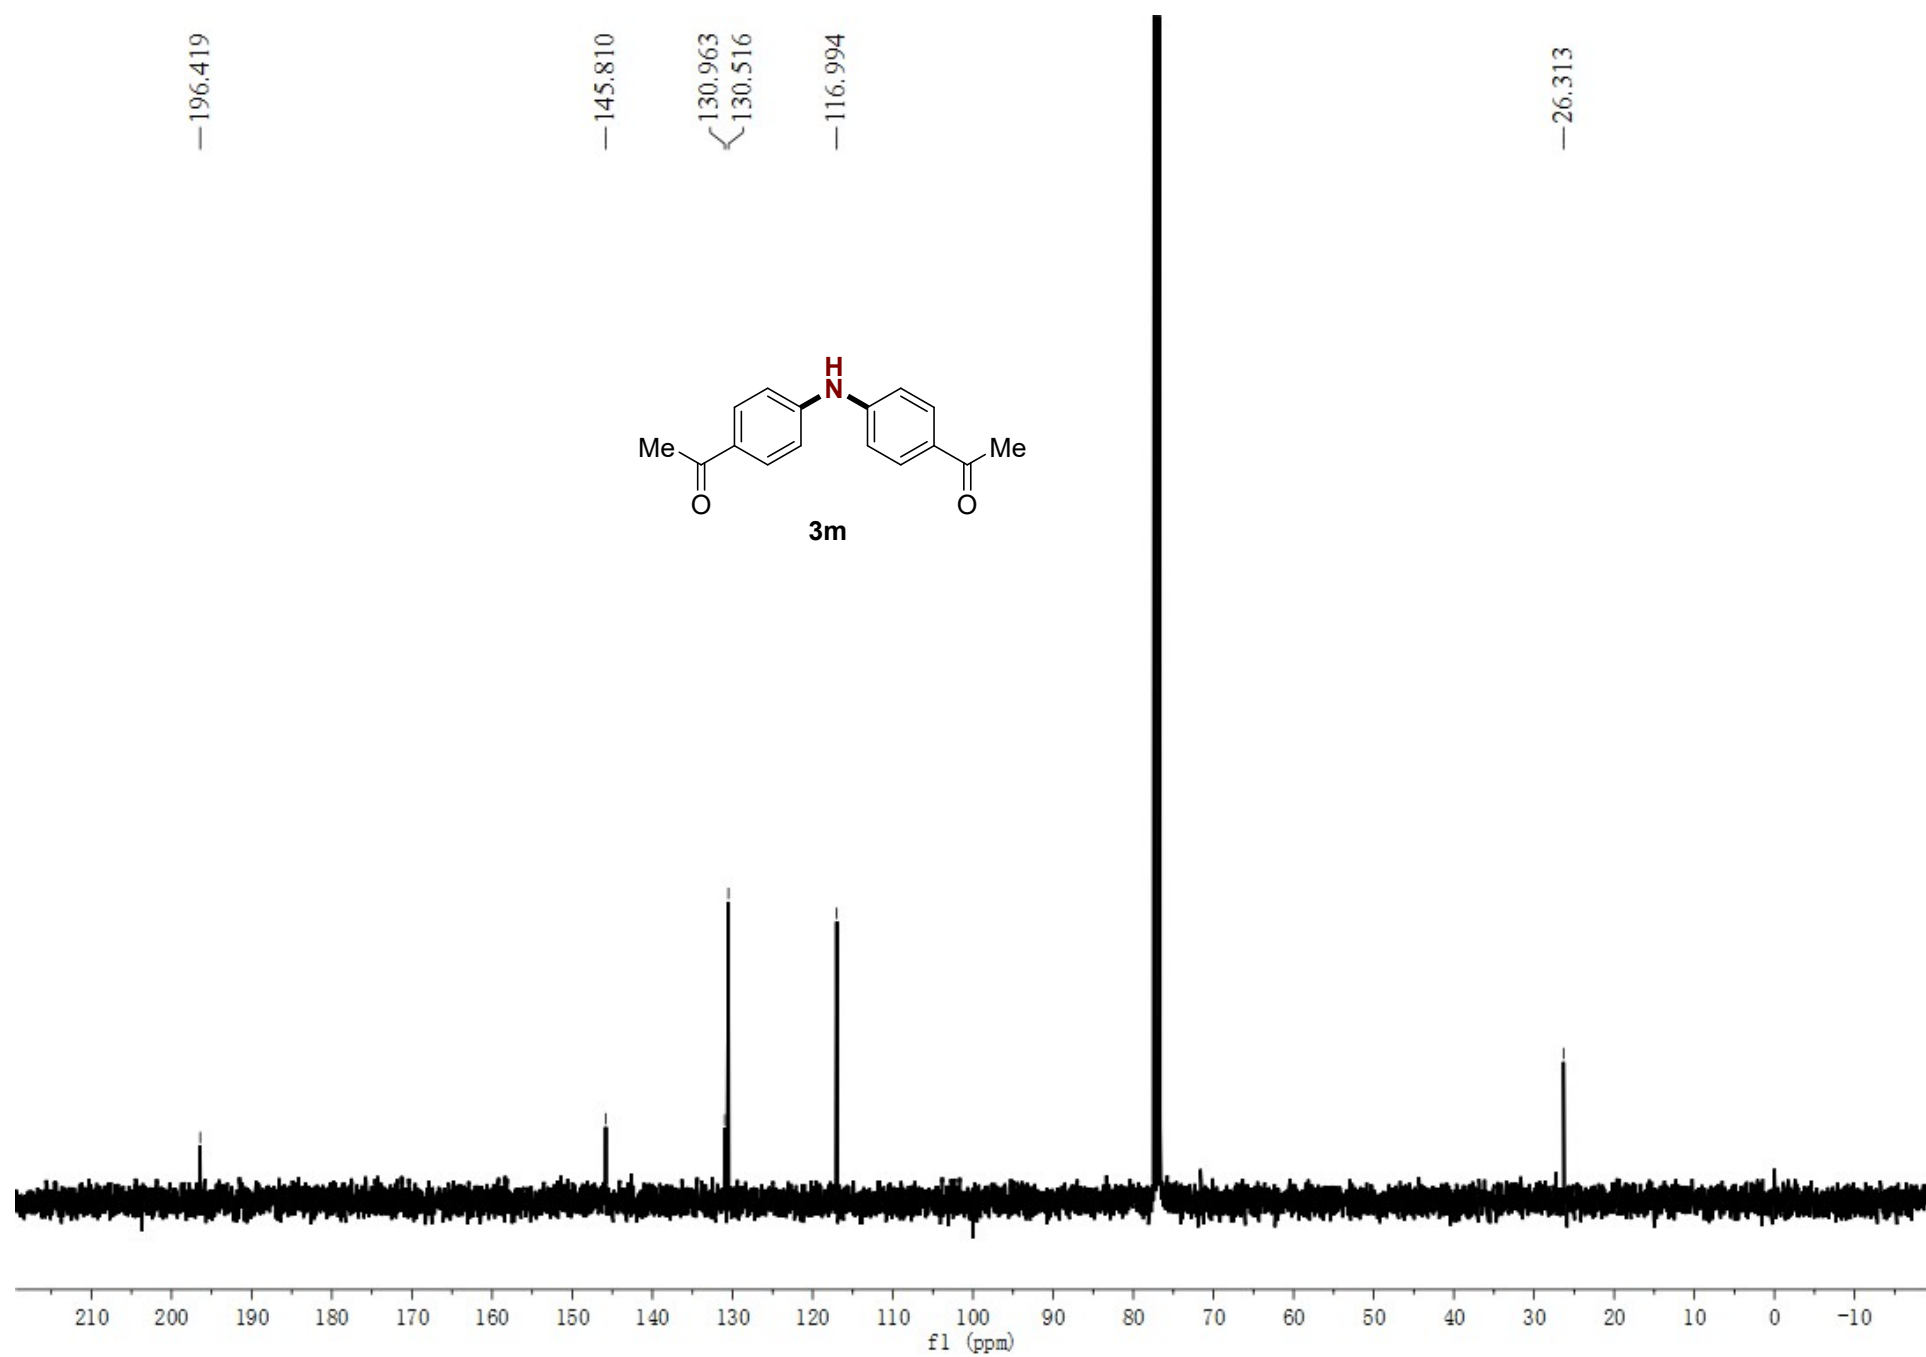

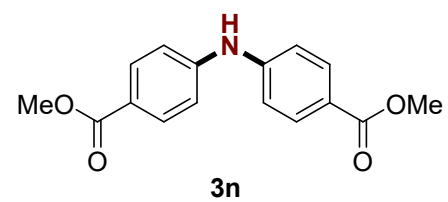

$\delta$  7.987  
 $\delta$  7.966  
 $\delta$  7.144  
 $\delta$  7.122  
 $\delta$  6.435  
 $\delta$  3.894

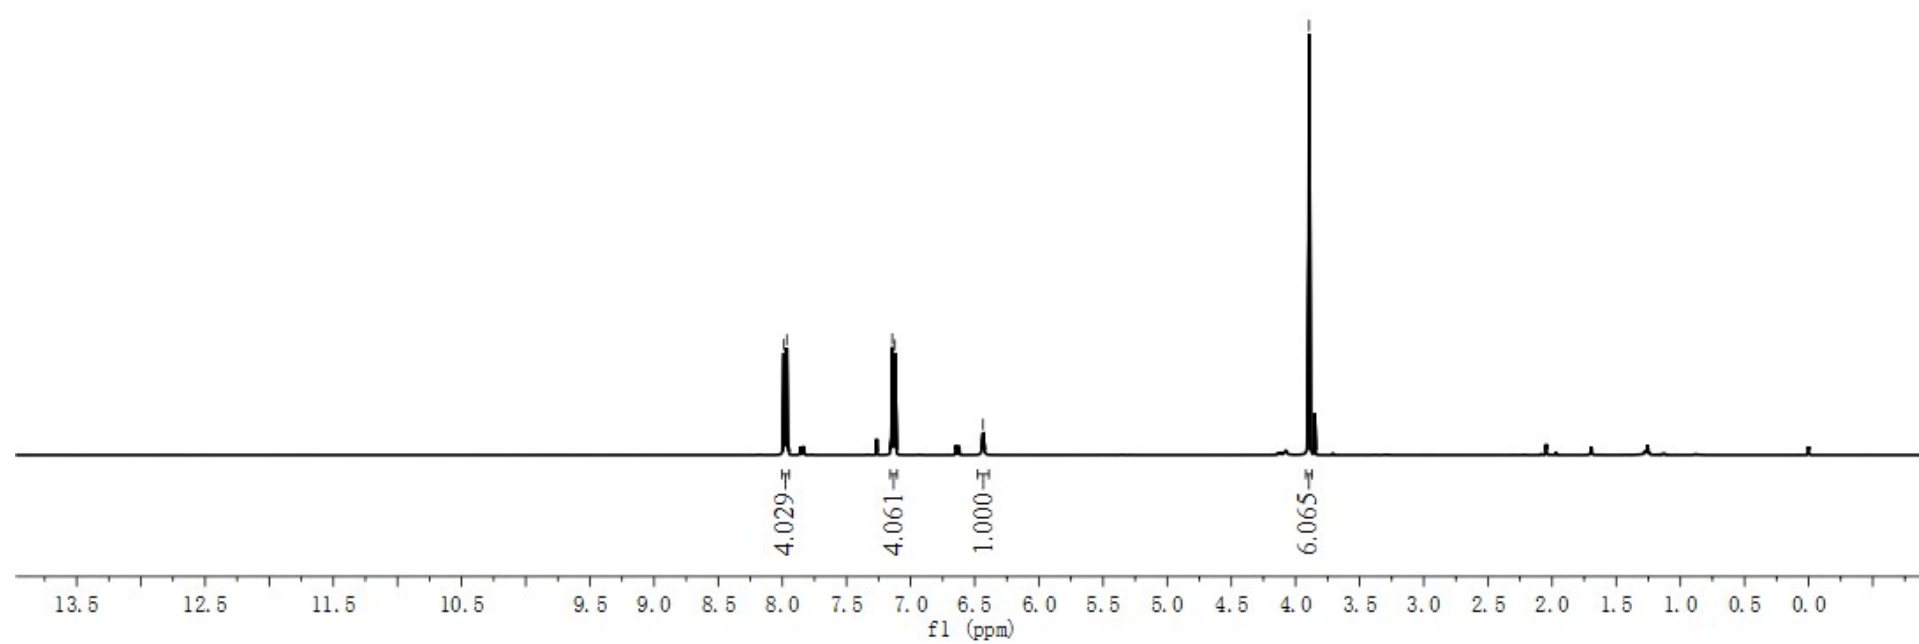

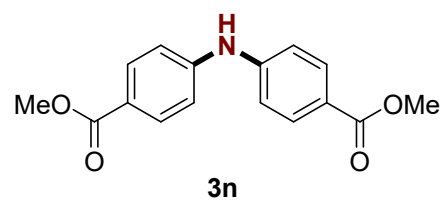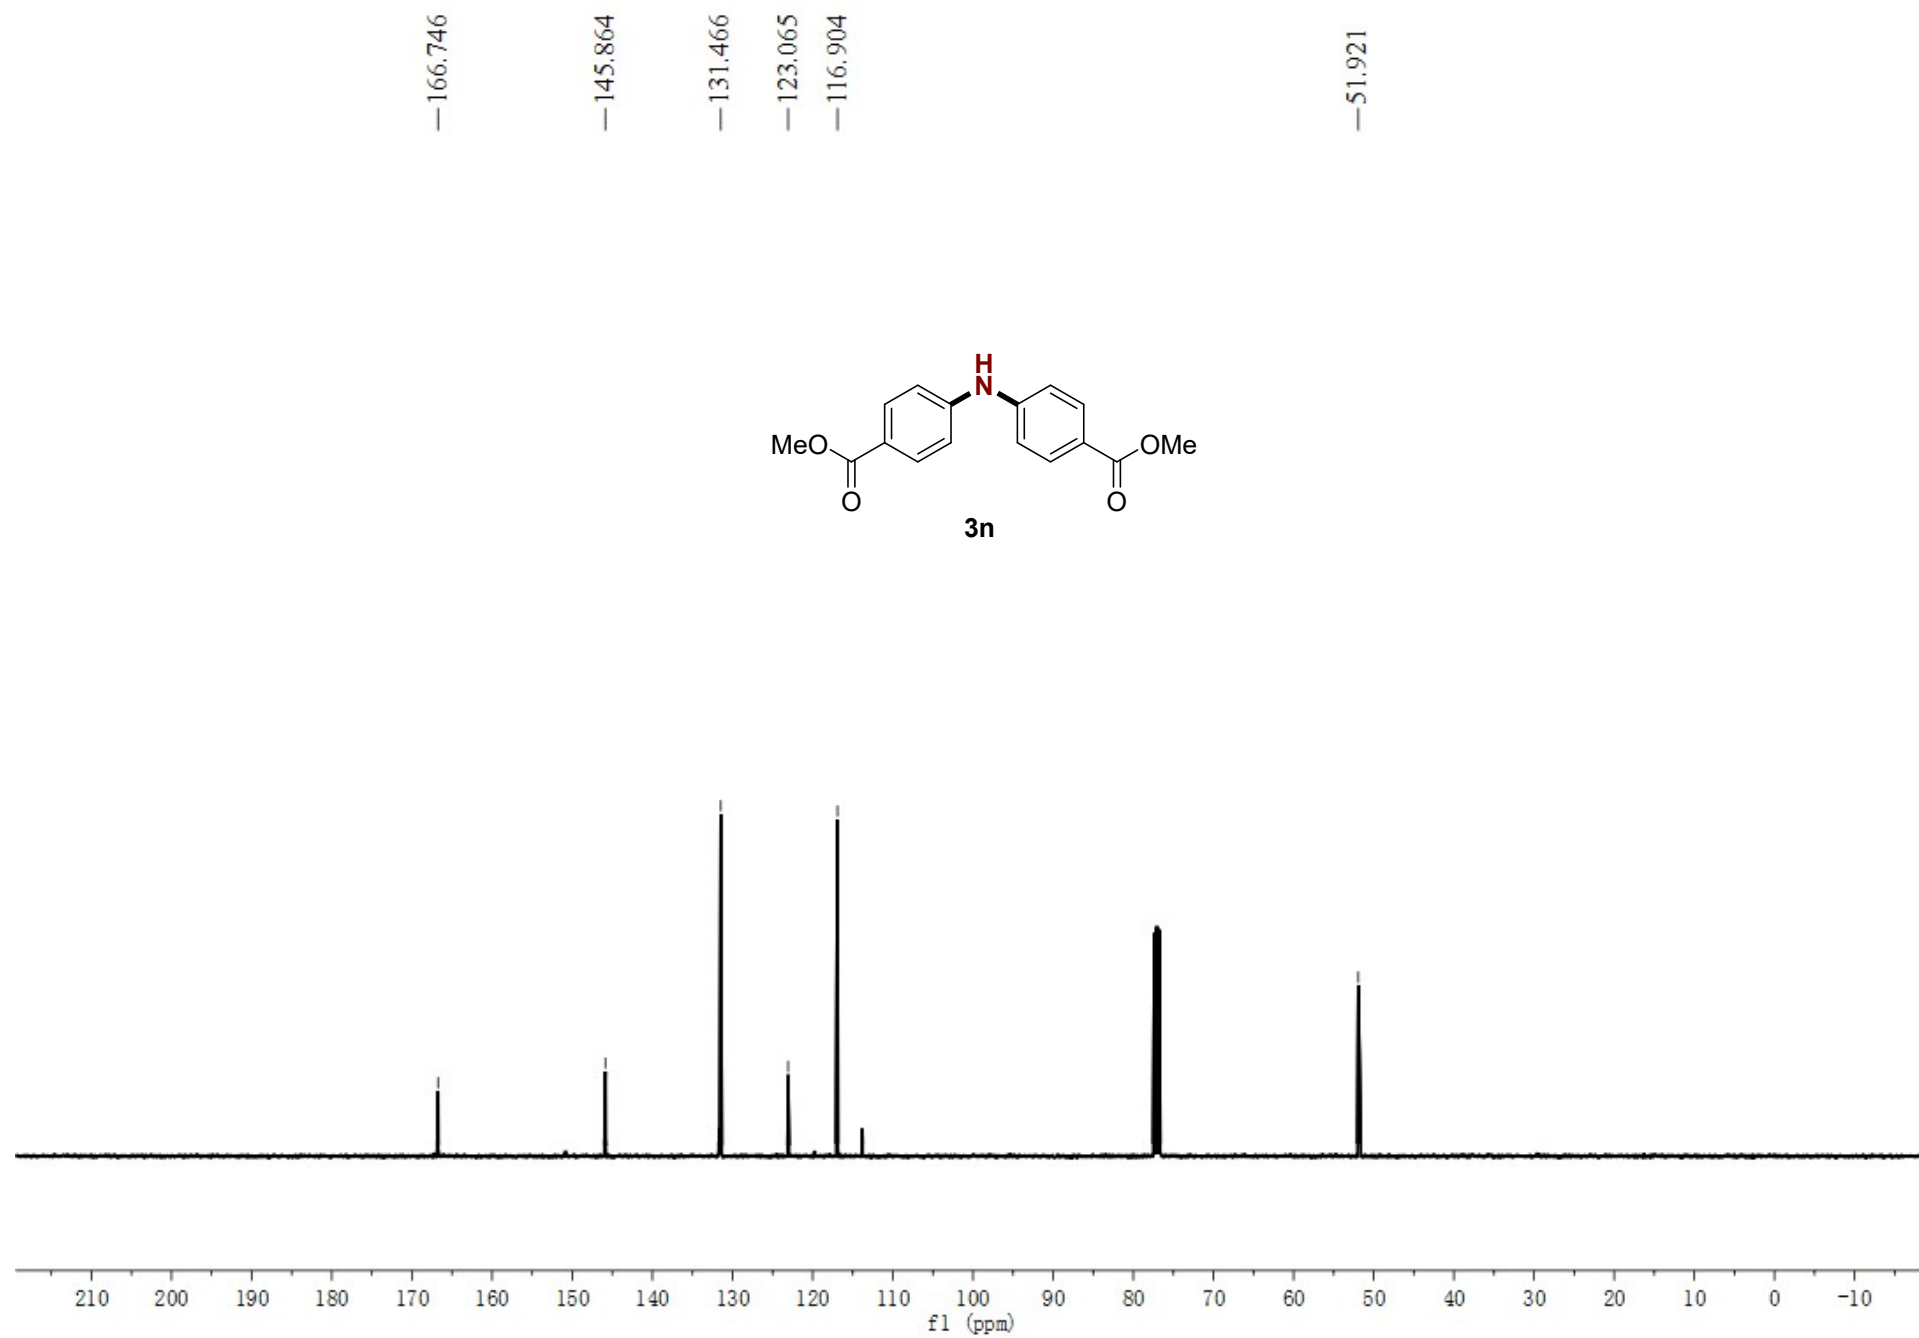

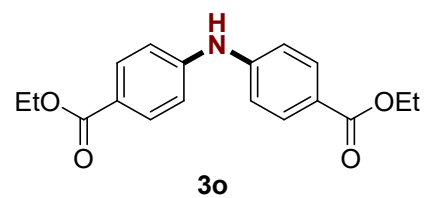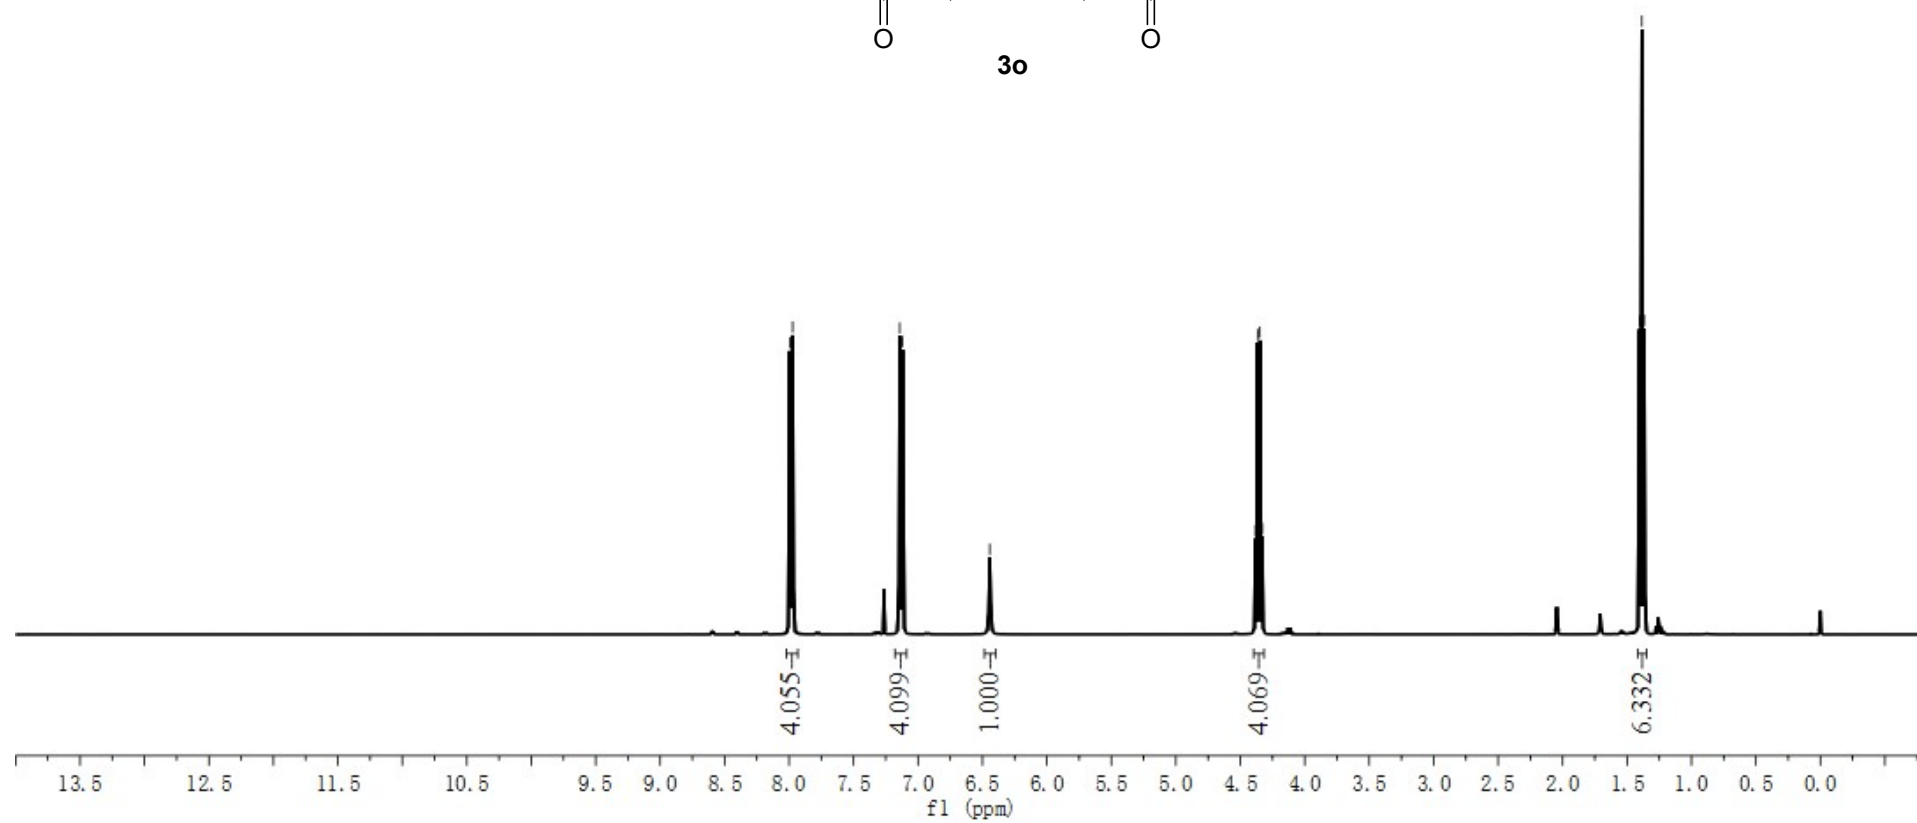

7.994  
7.972

7.141  
7.120

6.443

4.383  
4.365  
4.348  
4.330

1.403  
1.385  
1.367

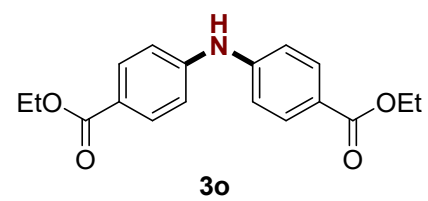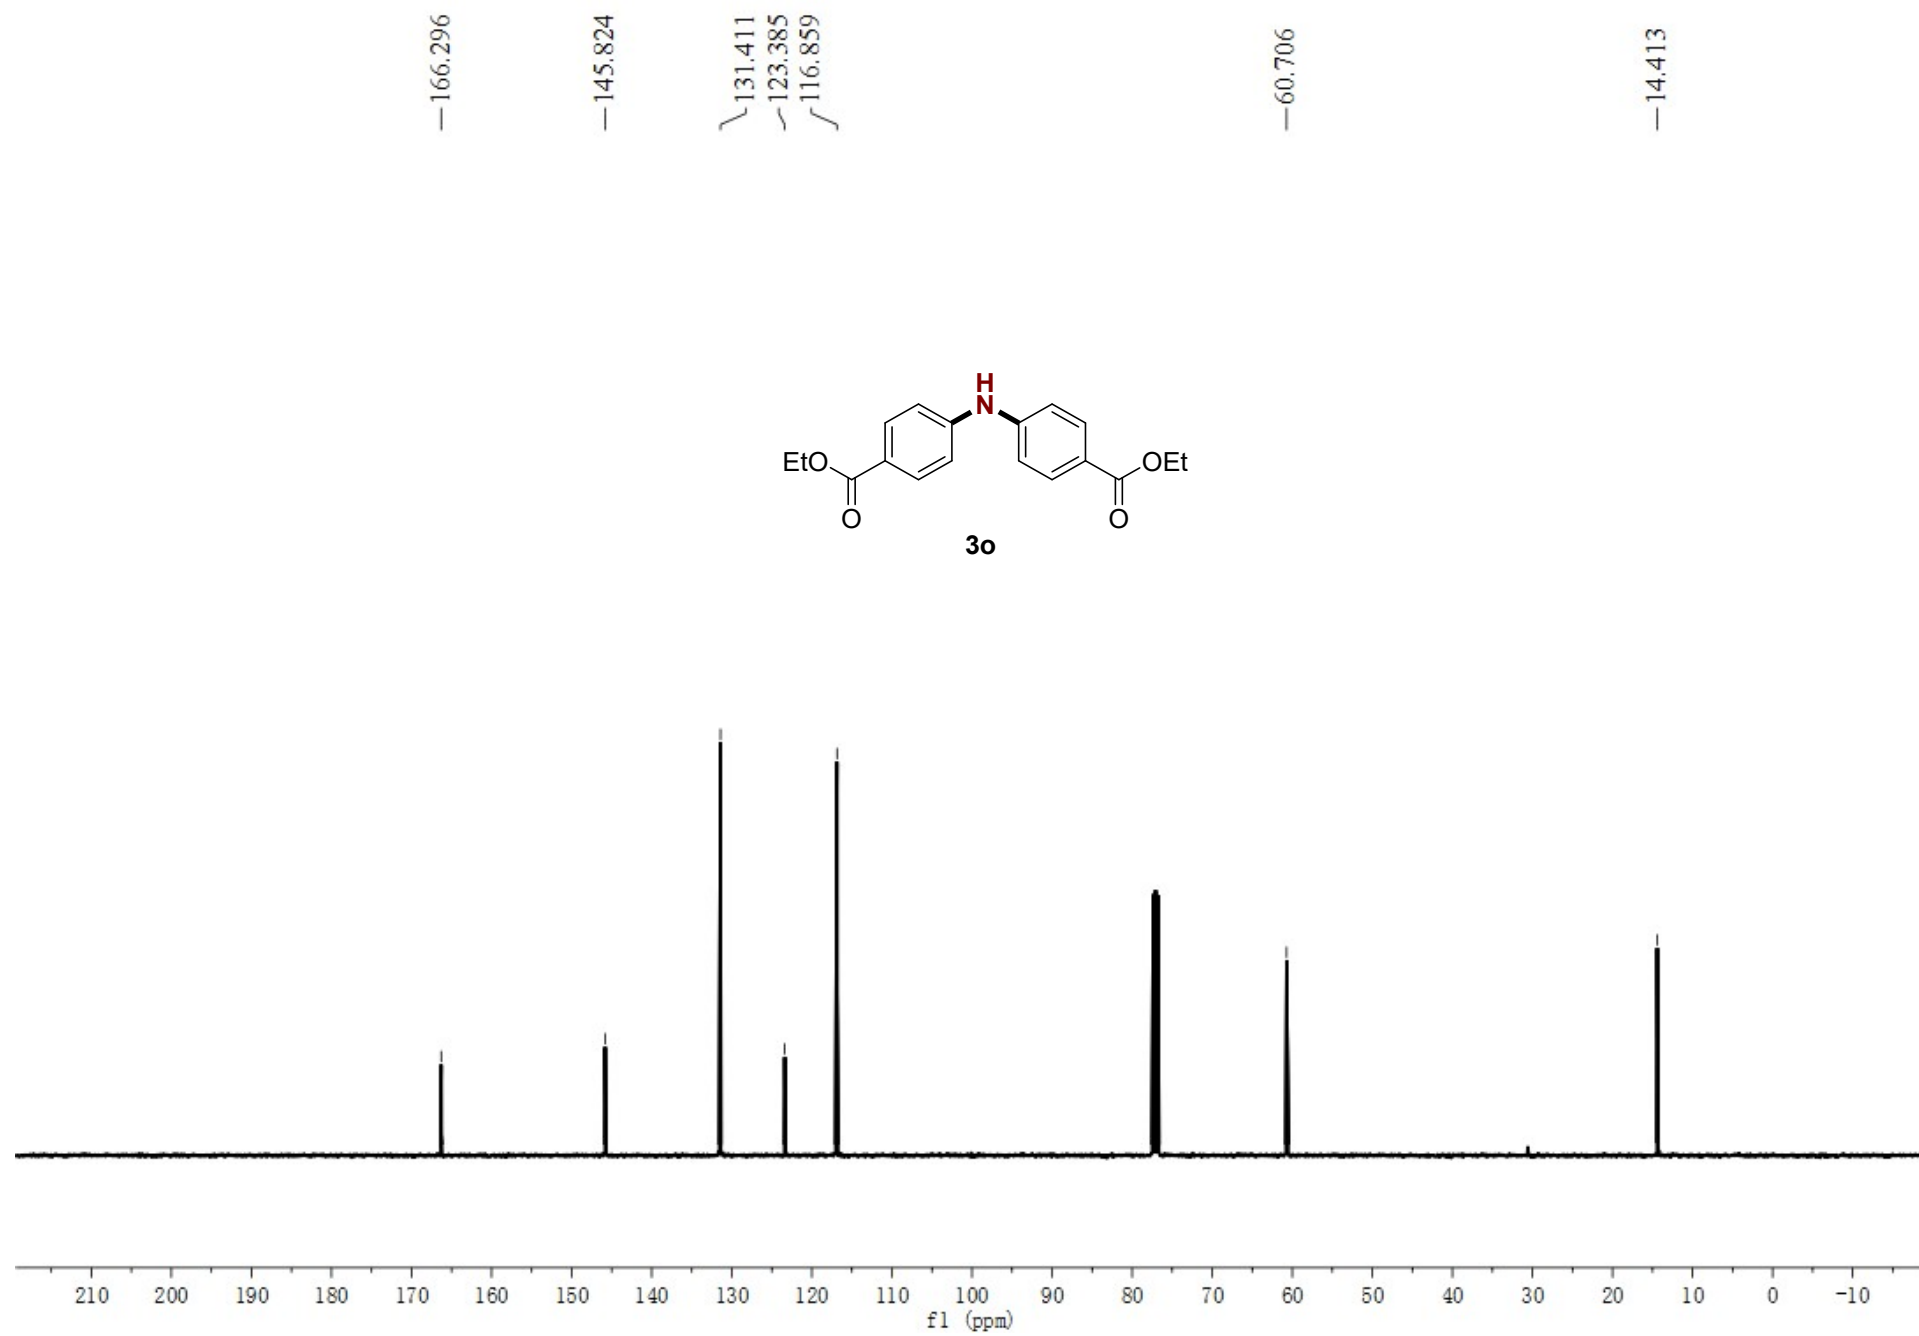

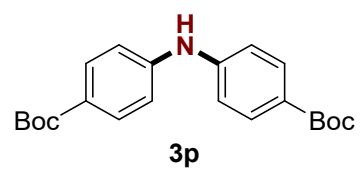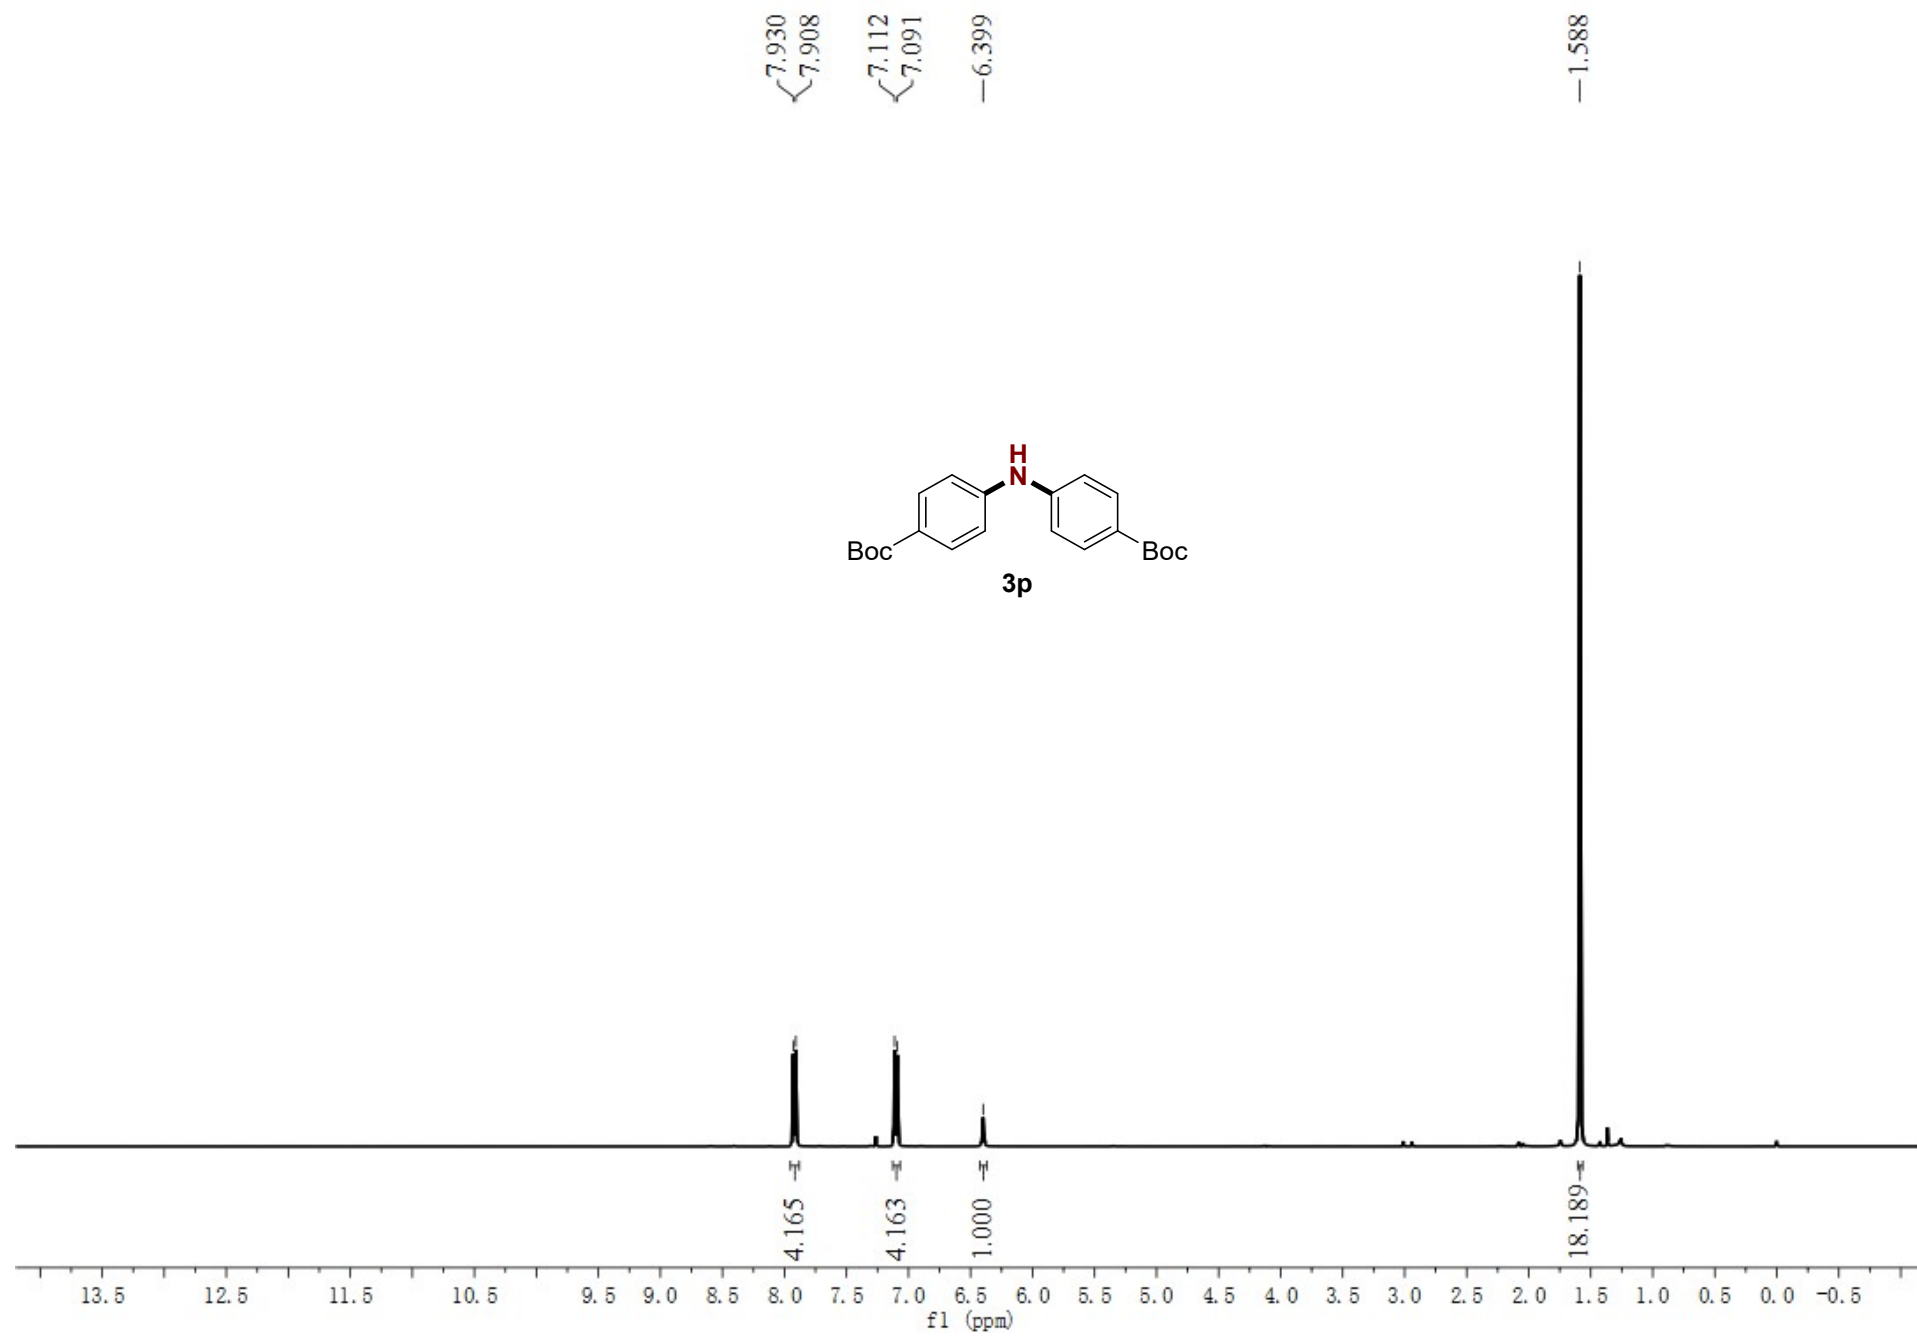

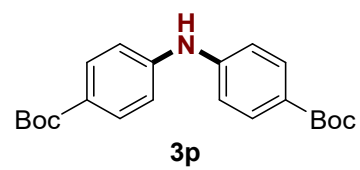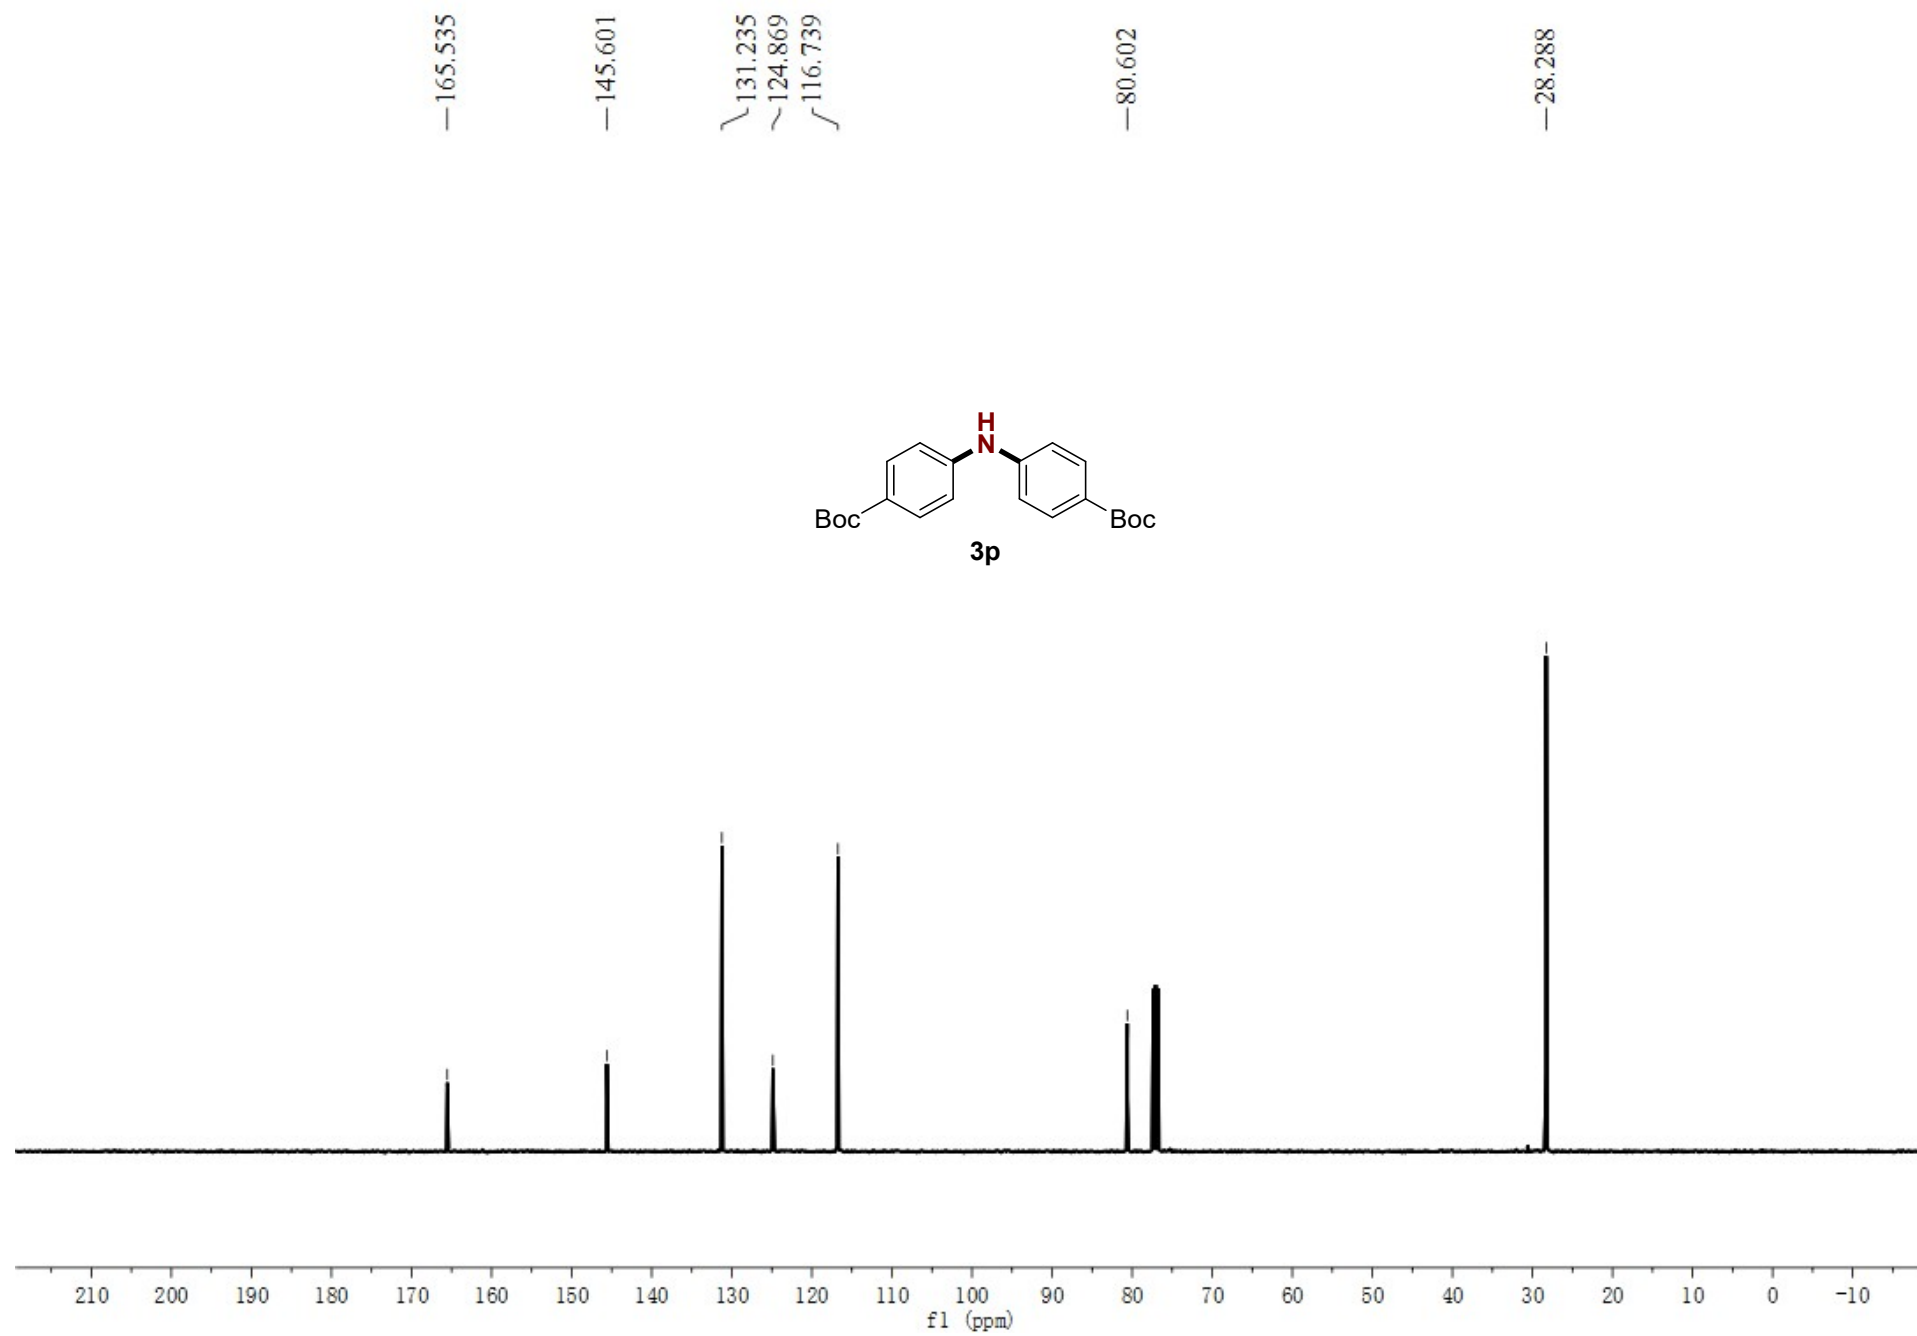

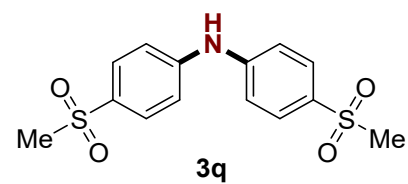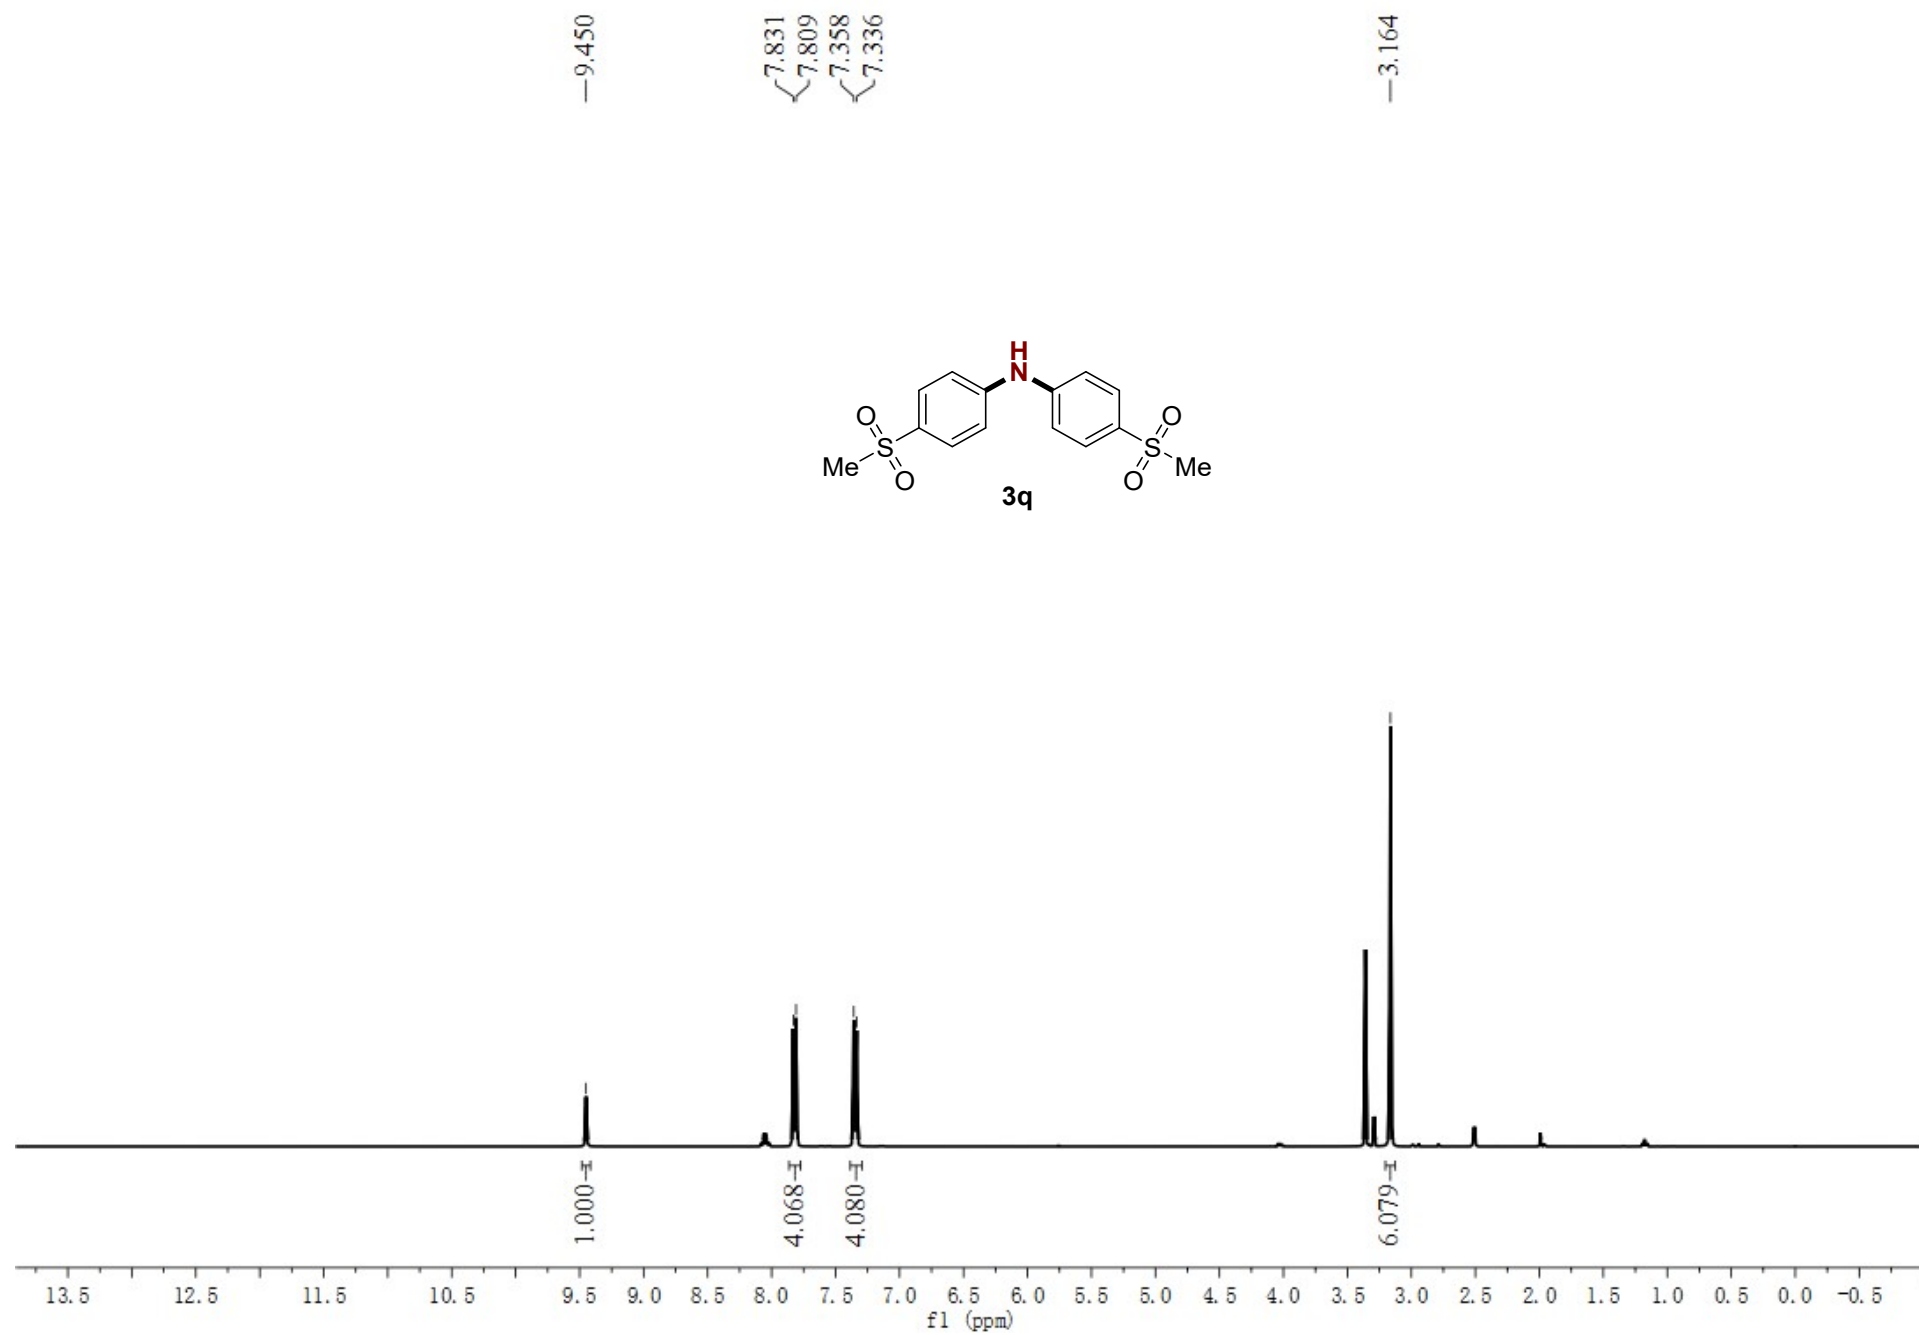

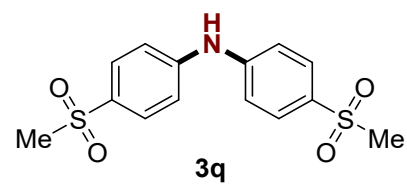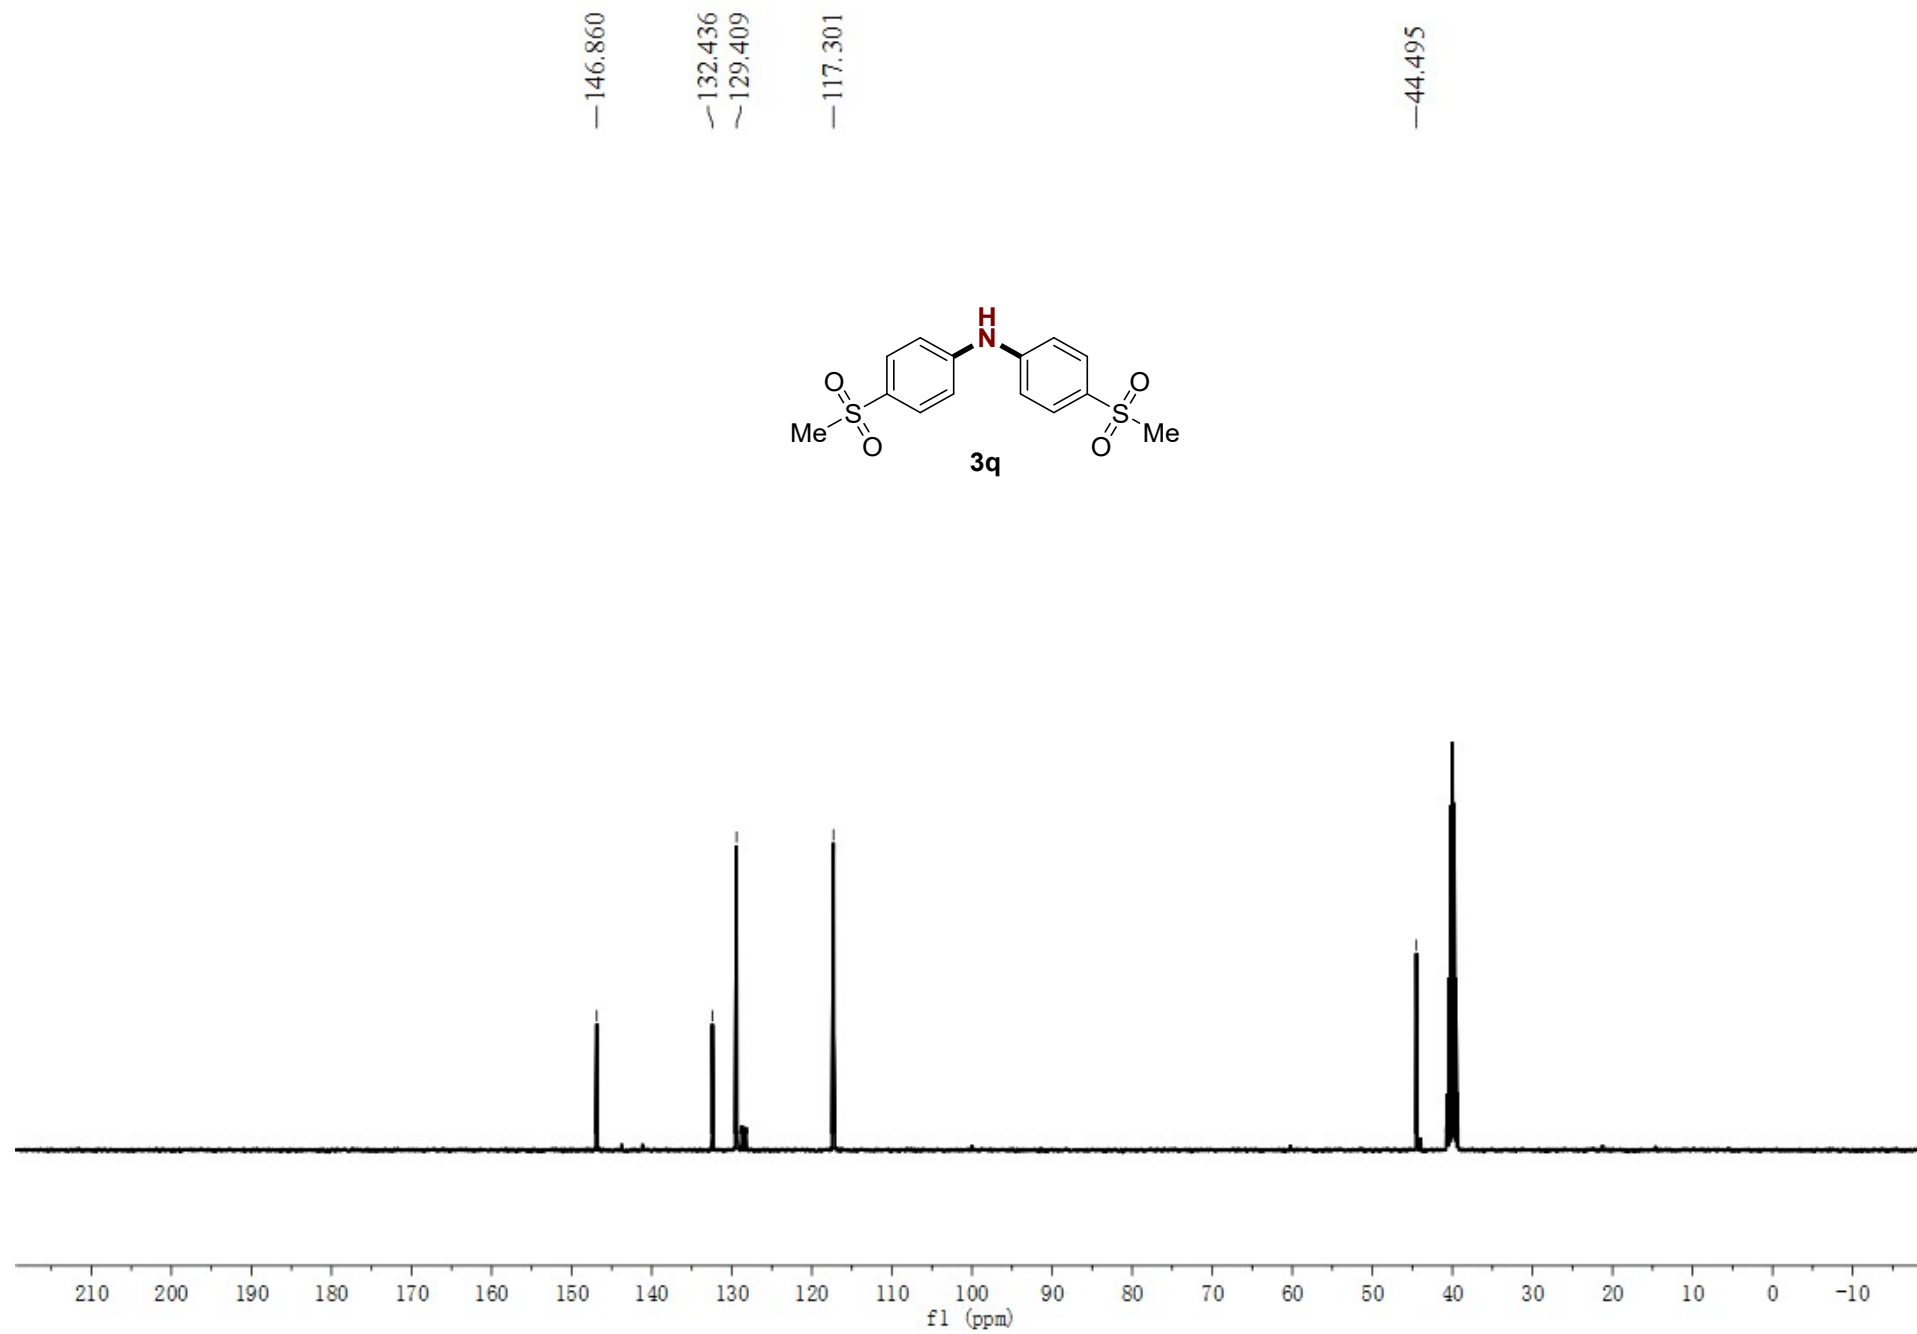

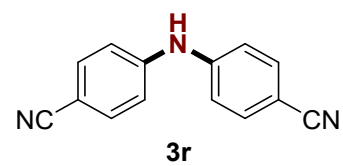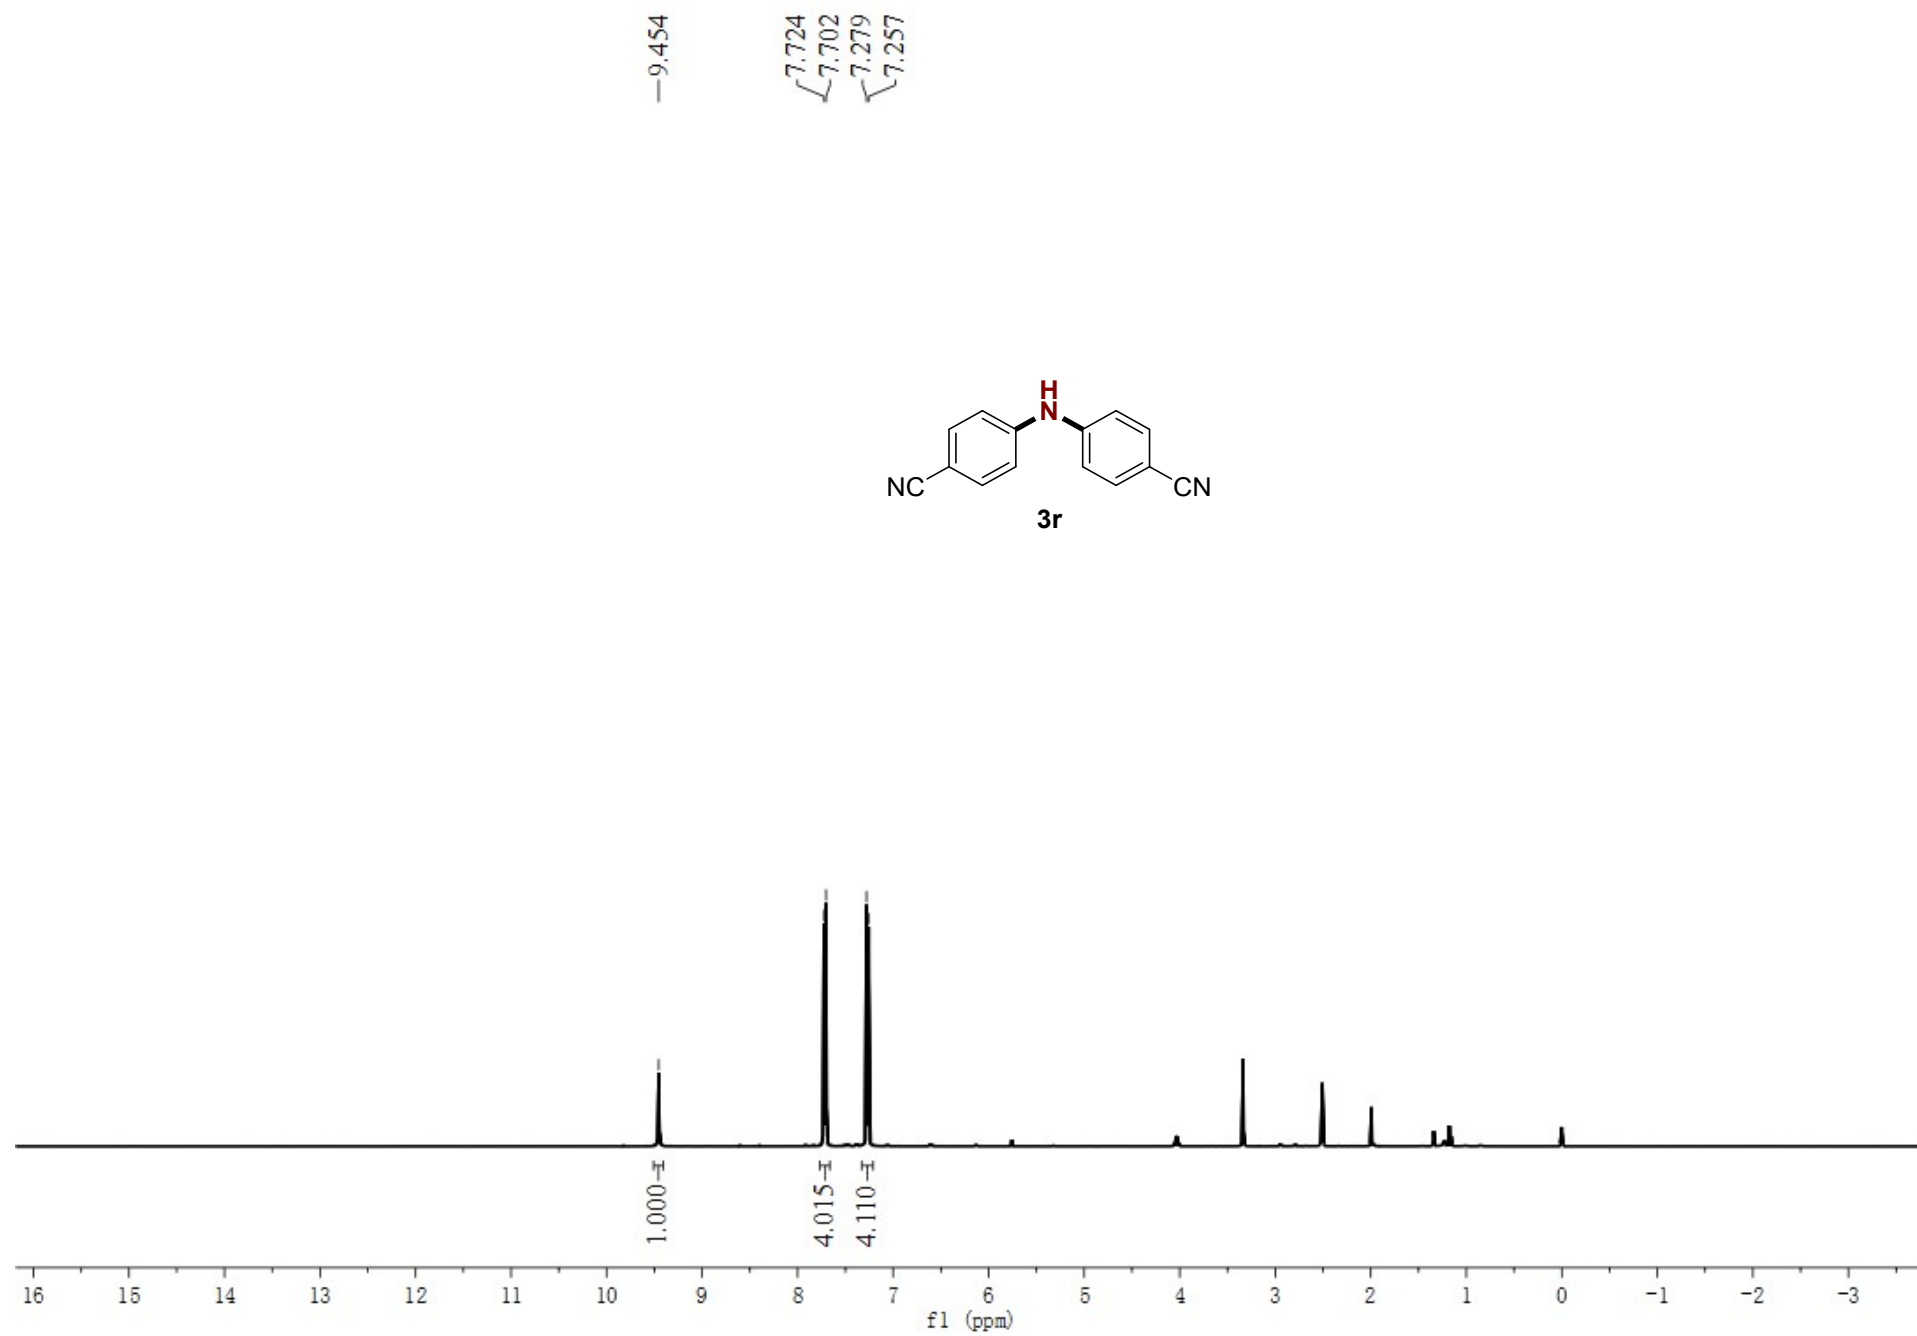

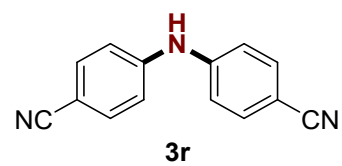

—146.224  
—134.252  
~119.903  
~117.760  
—102.573

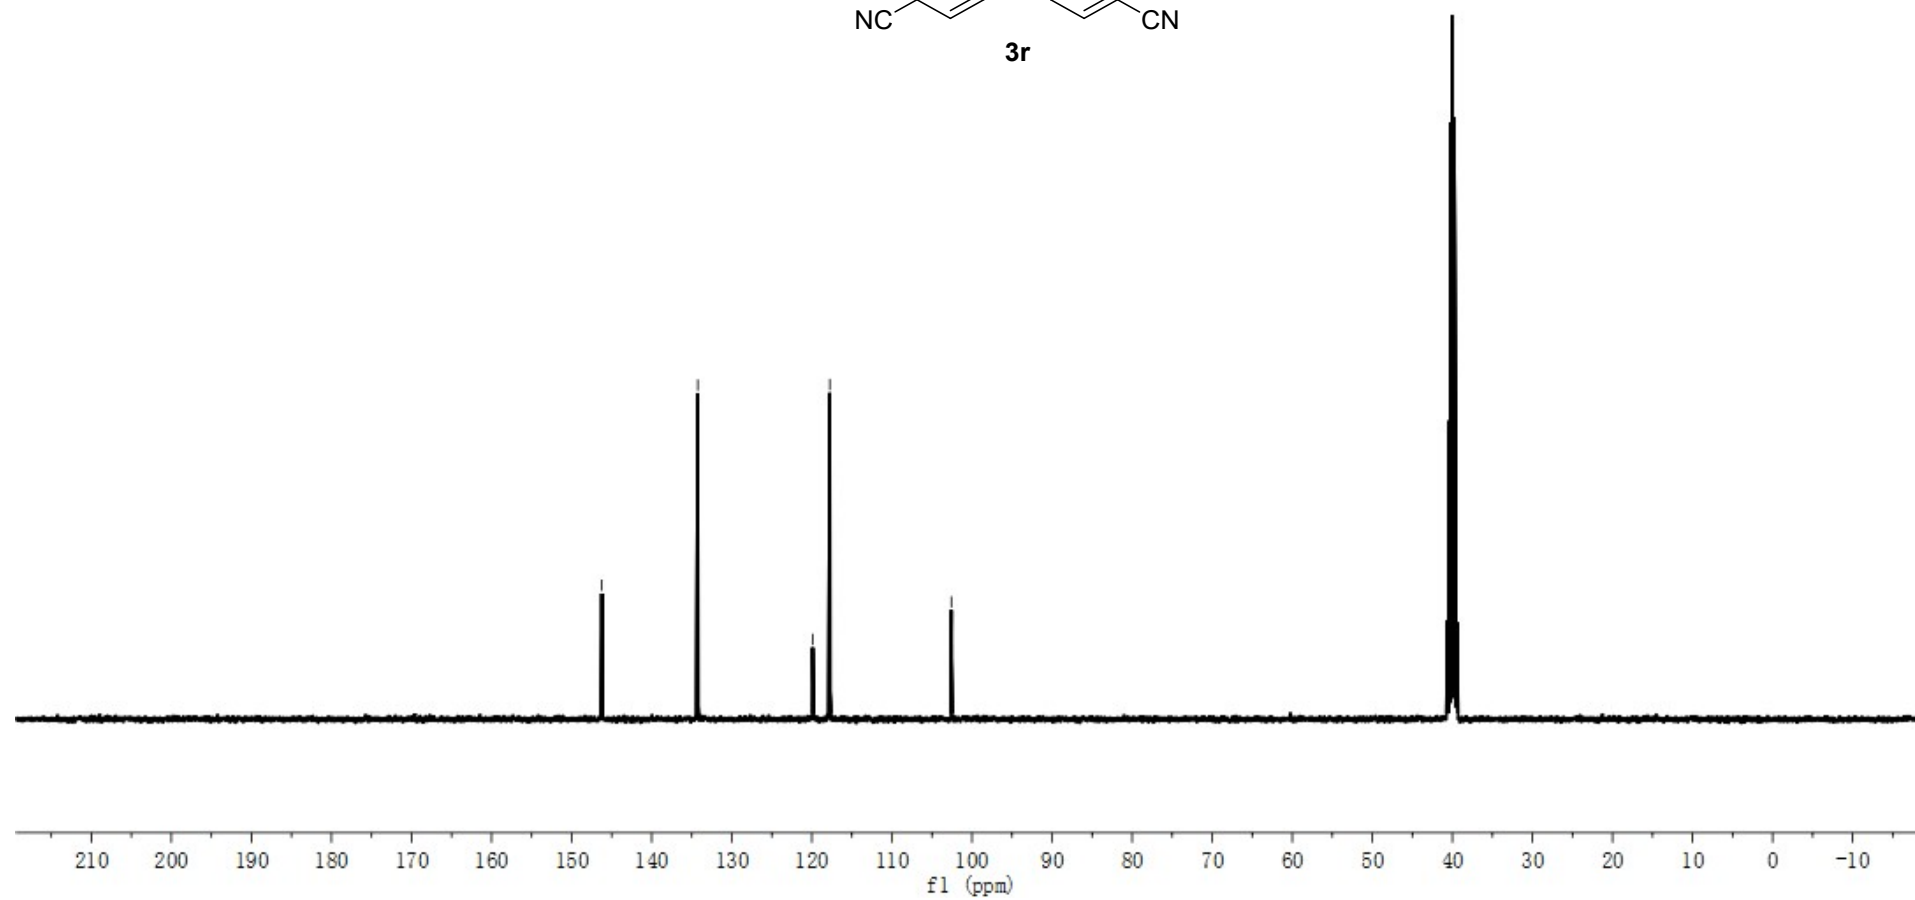

7.336  
7.315  
7.033  
7.012  
6.693  
6.666  
6.649  
6.622  
5.796  
5.640  
5.596  
5.135  
5.107

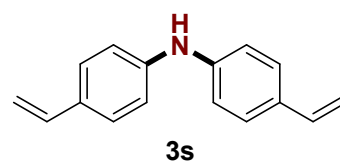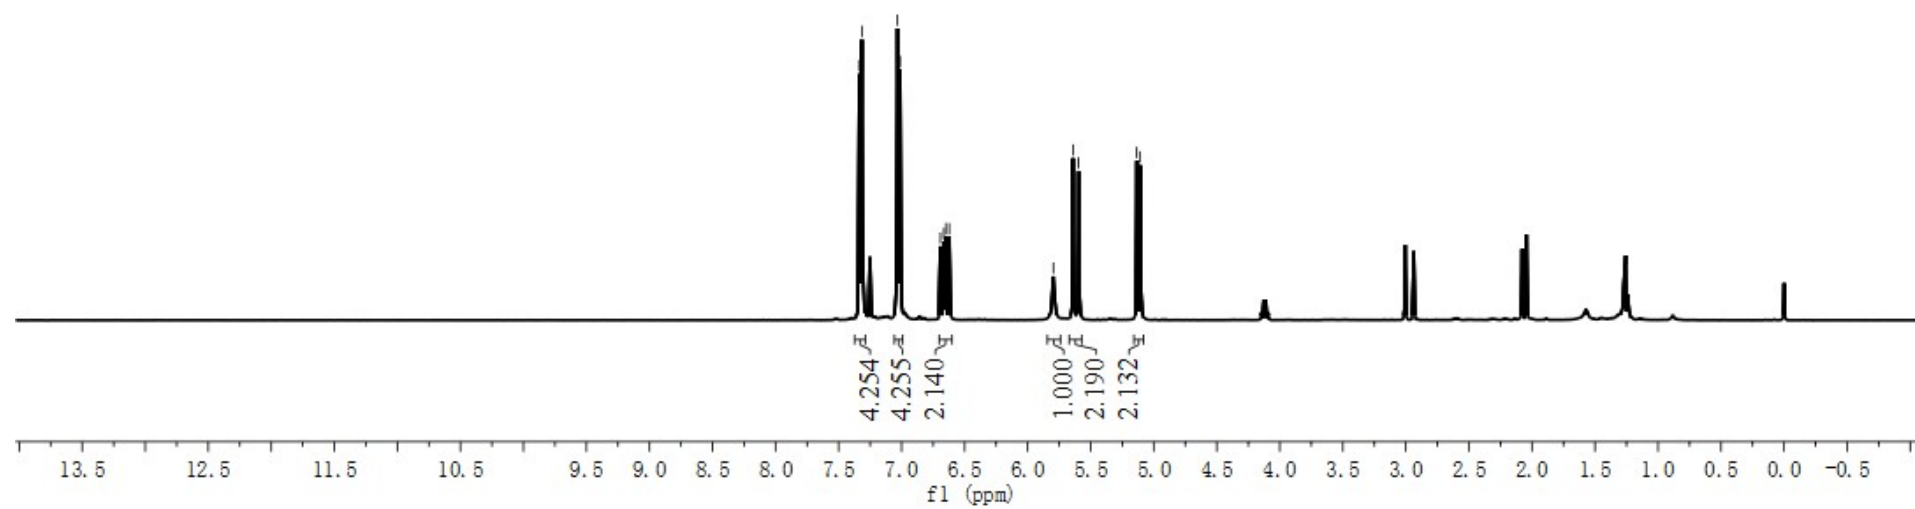

142.465  
136.298  
130.732  
127.329  
117.687  
111.358

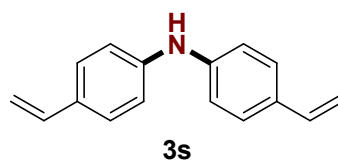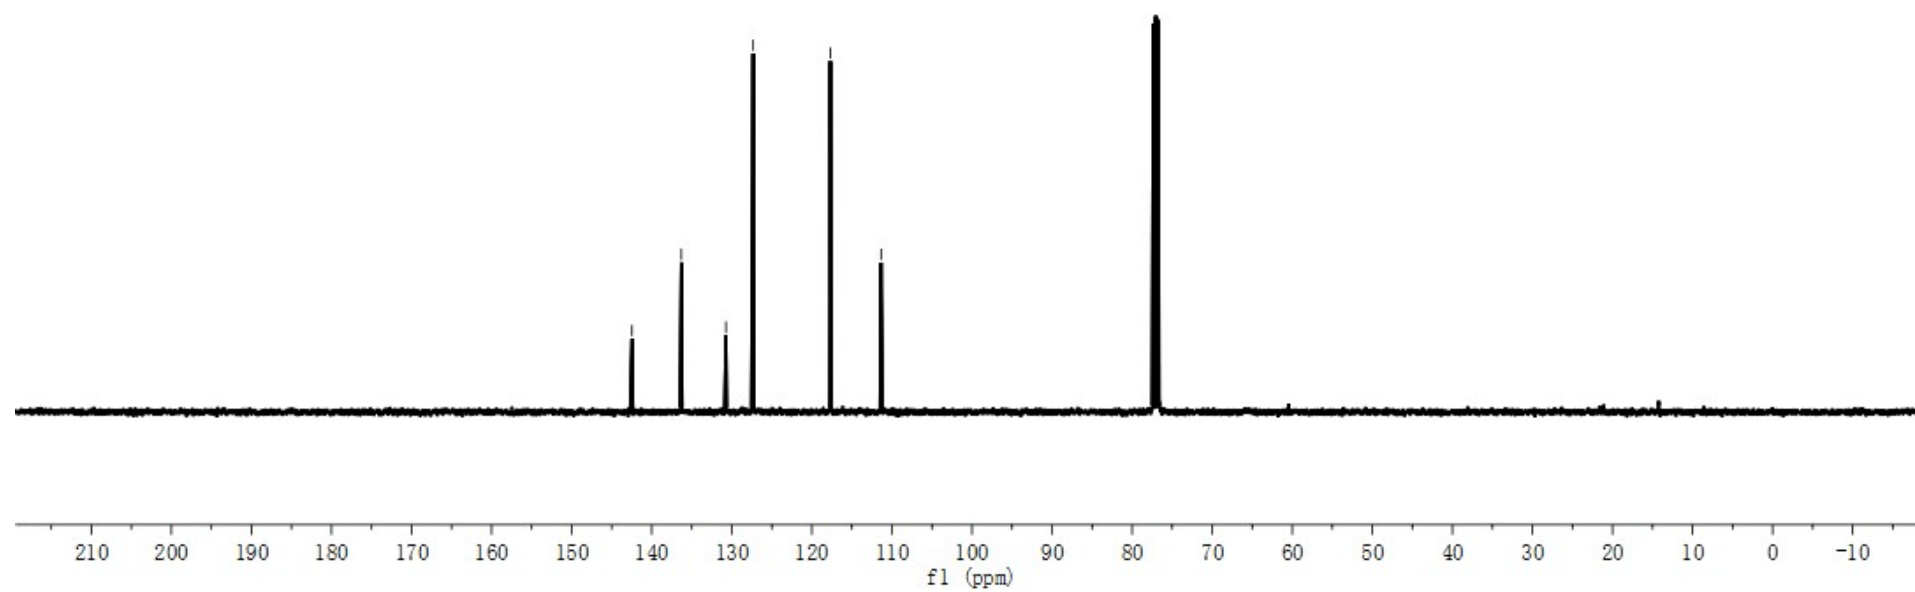

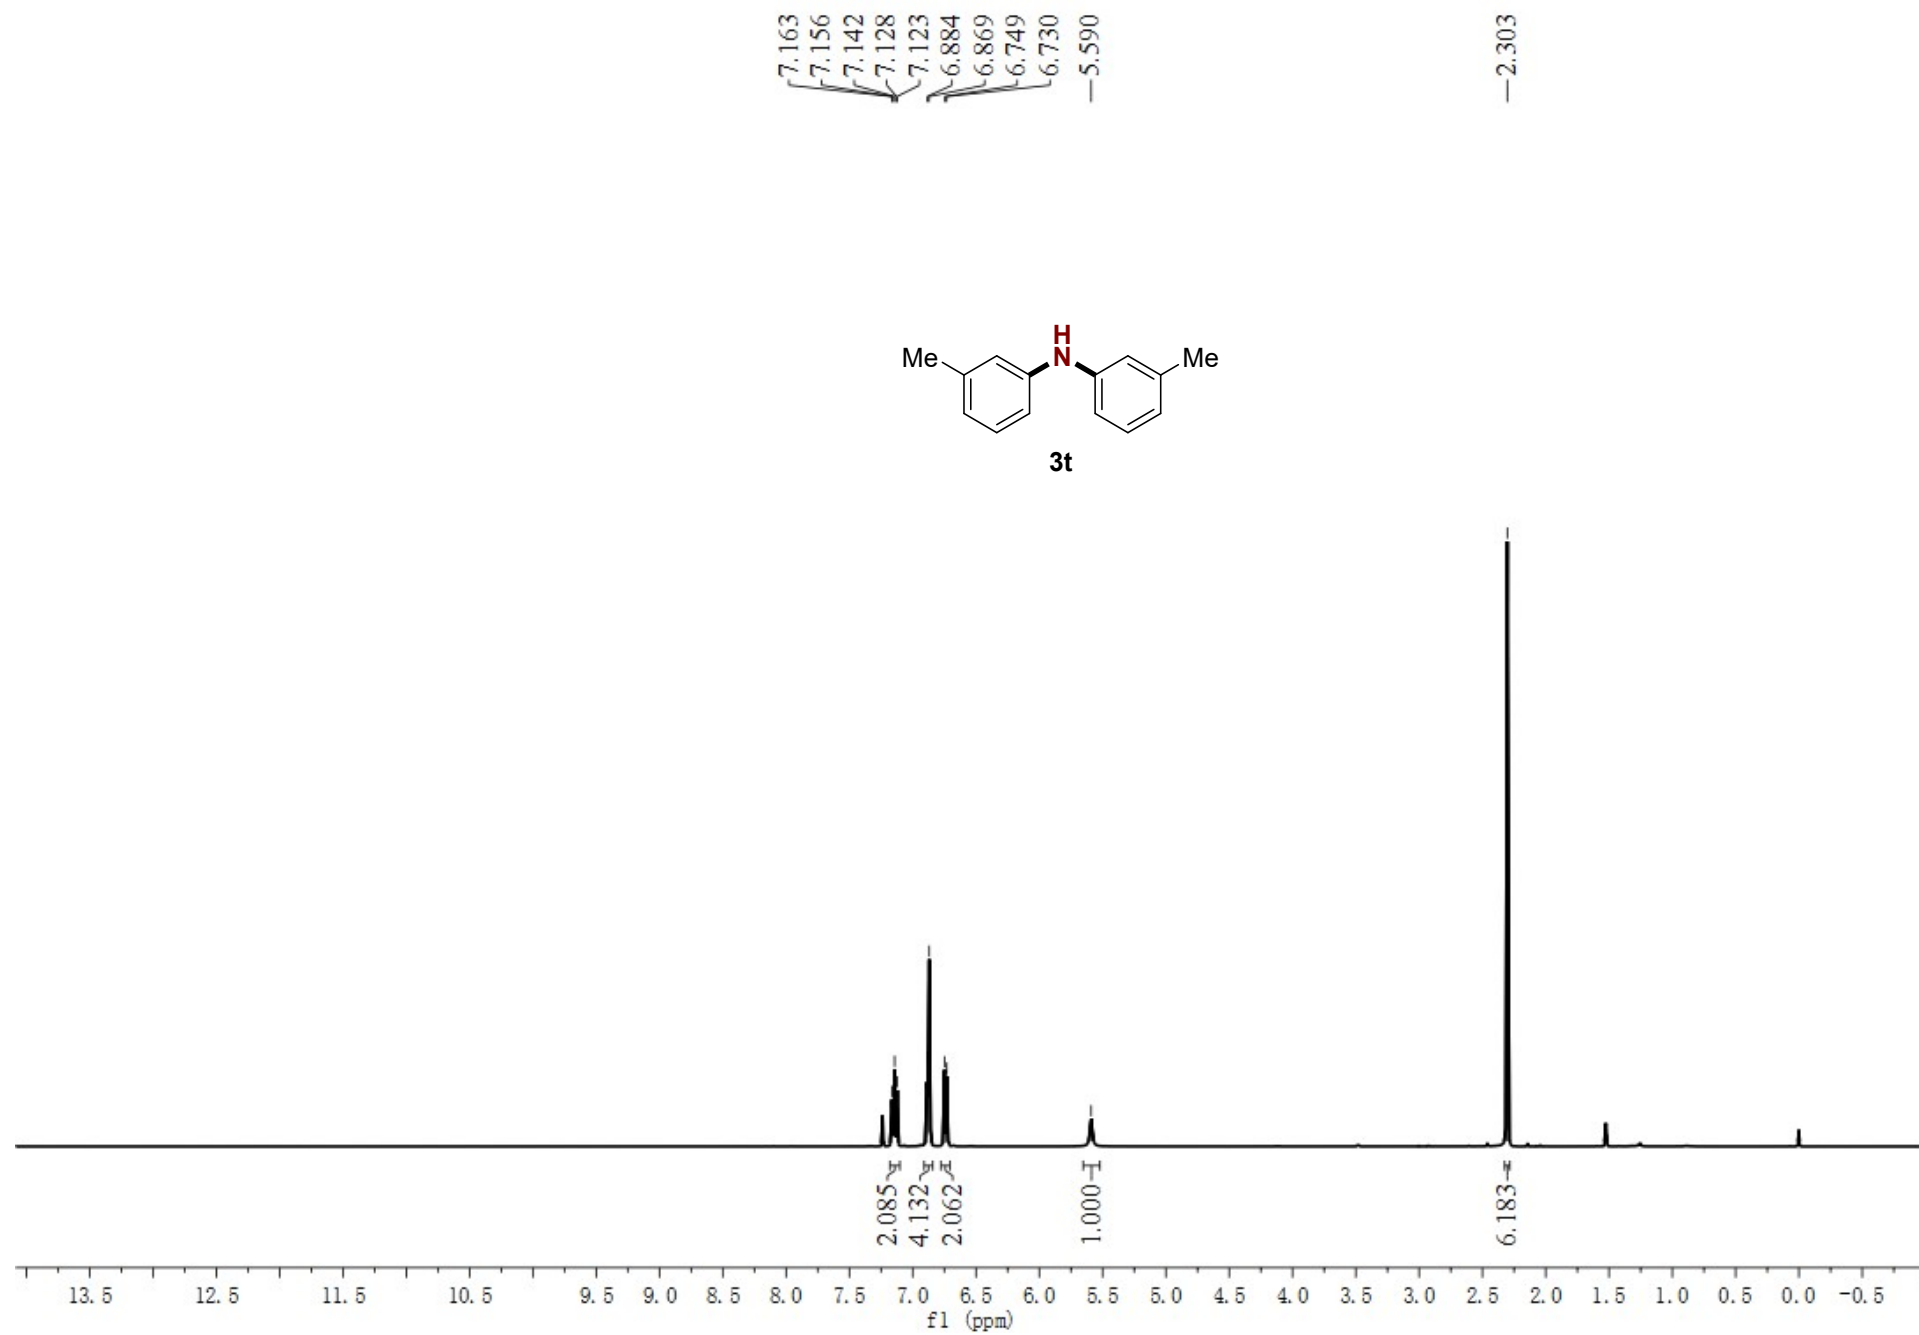

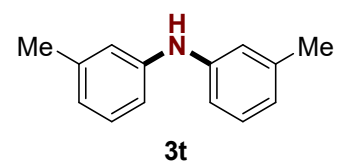

-143.217  
 -139.221  
 ~129.168  
 /121.794  
 /118.583  
 /114.961

-21.557

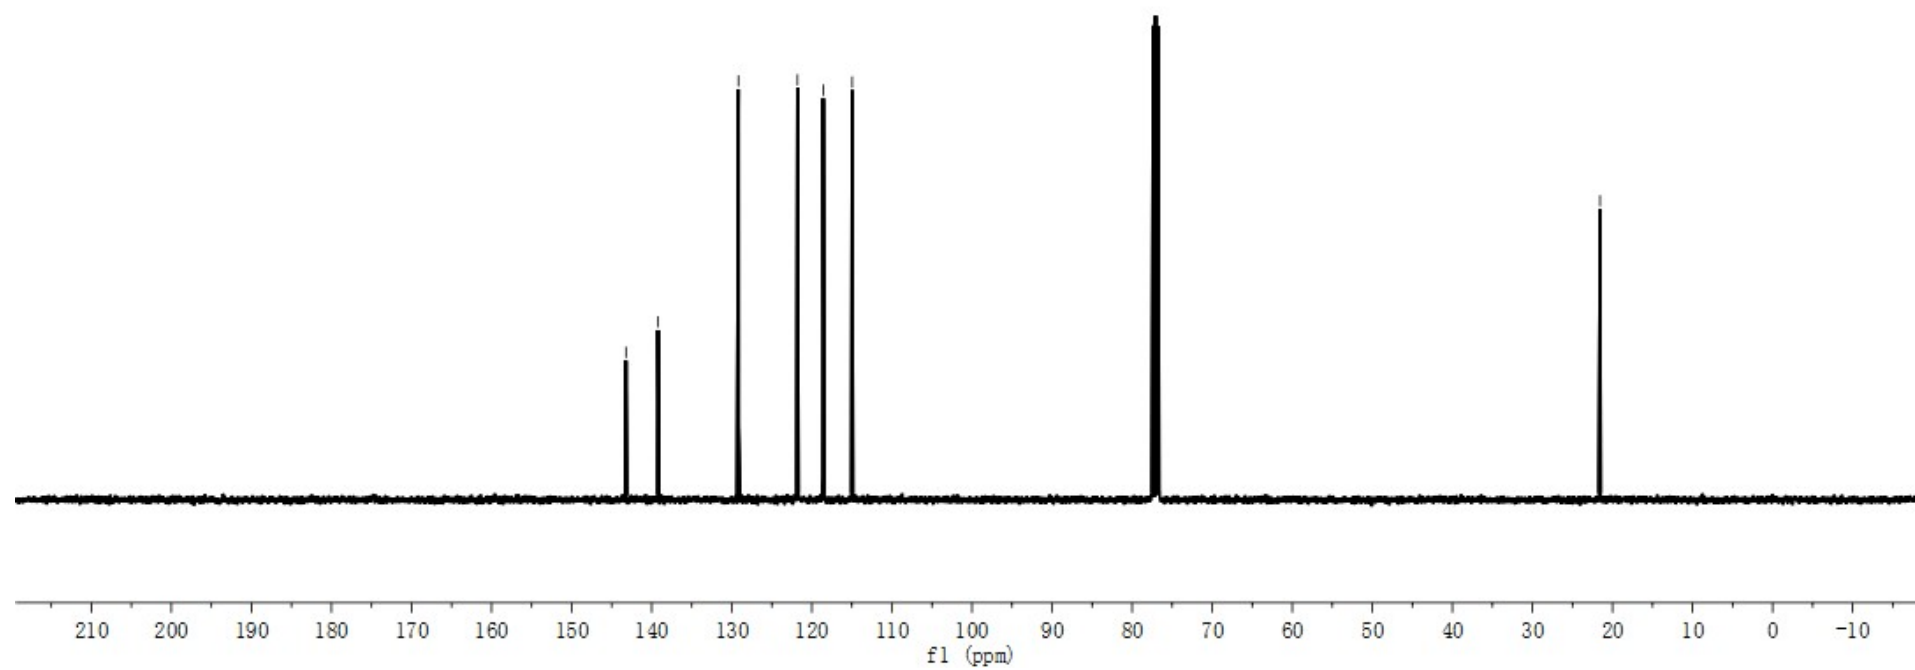

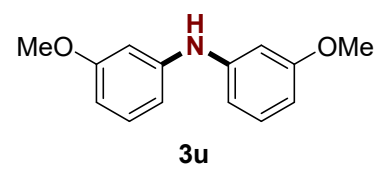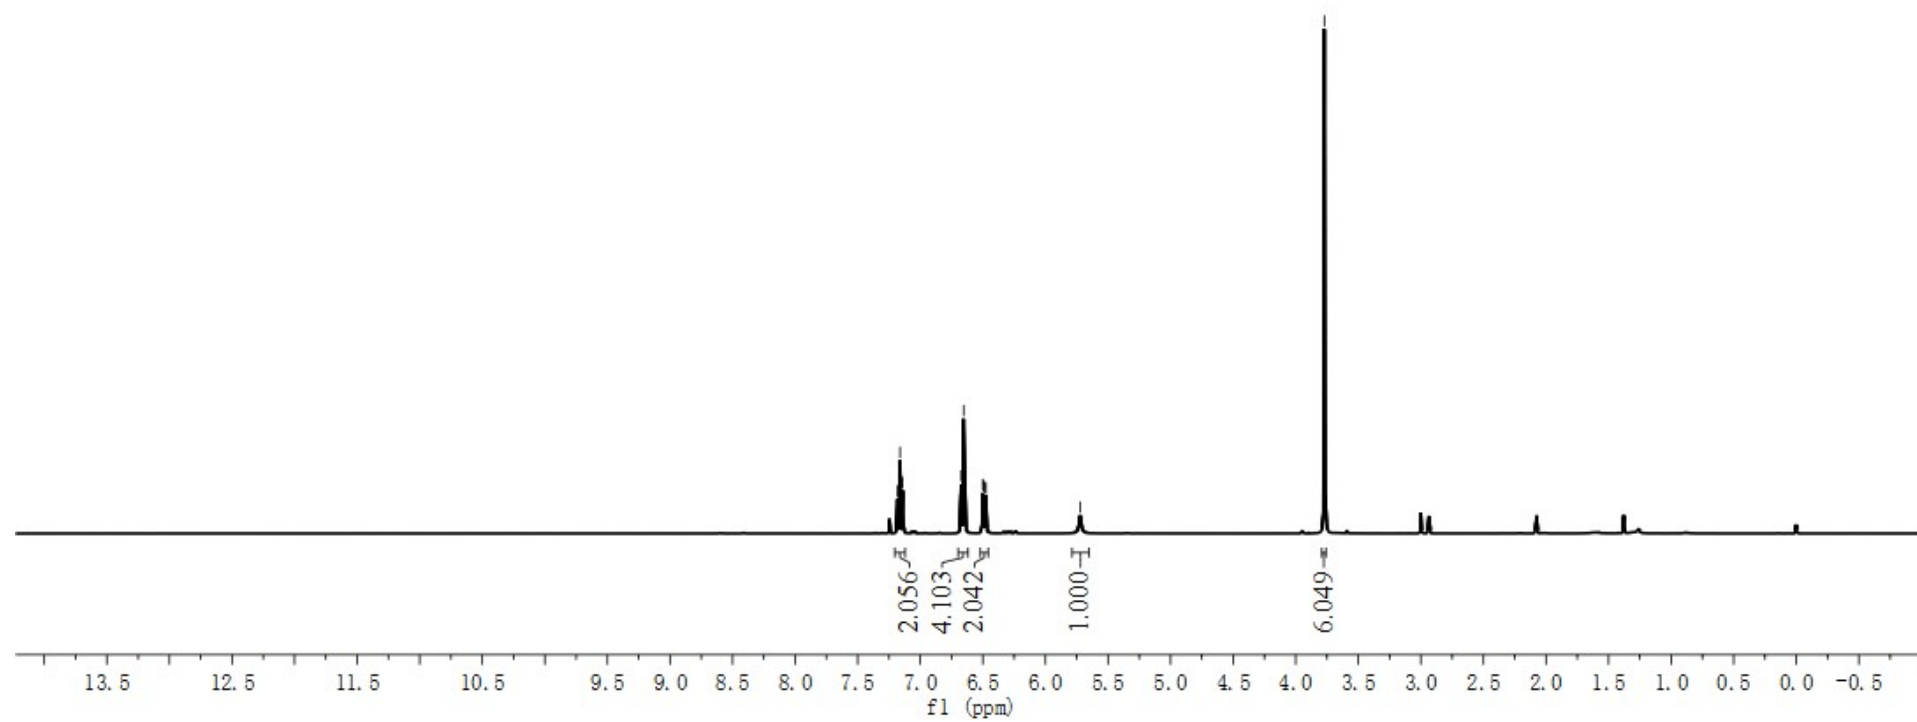

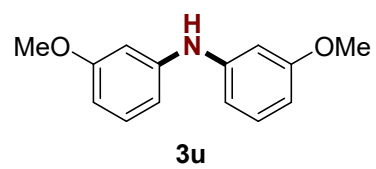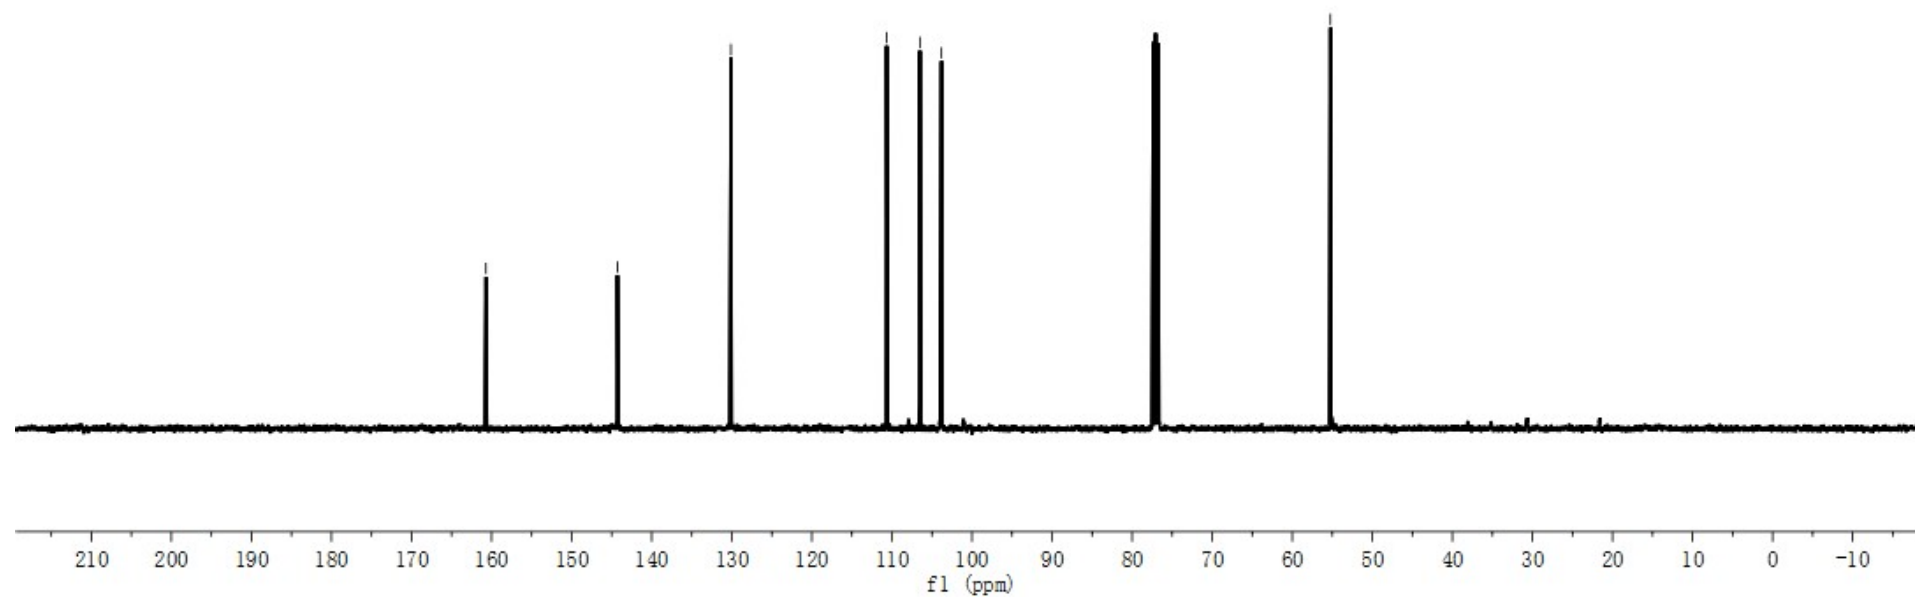

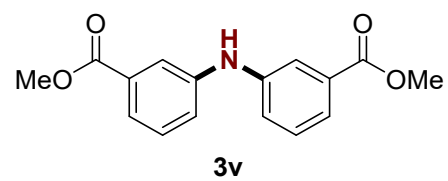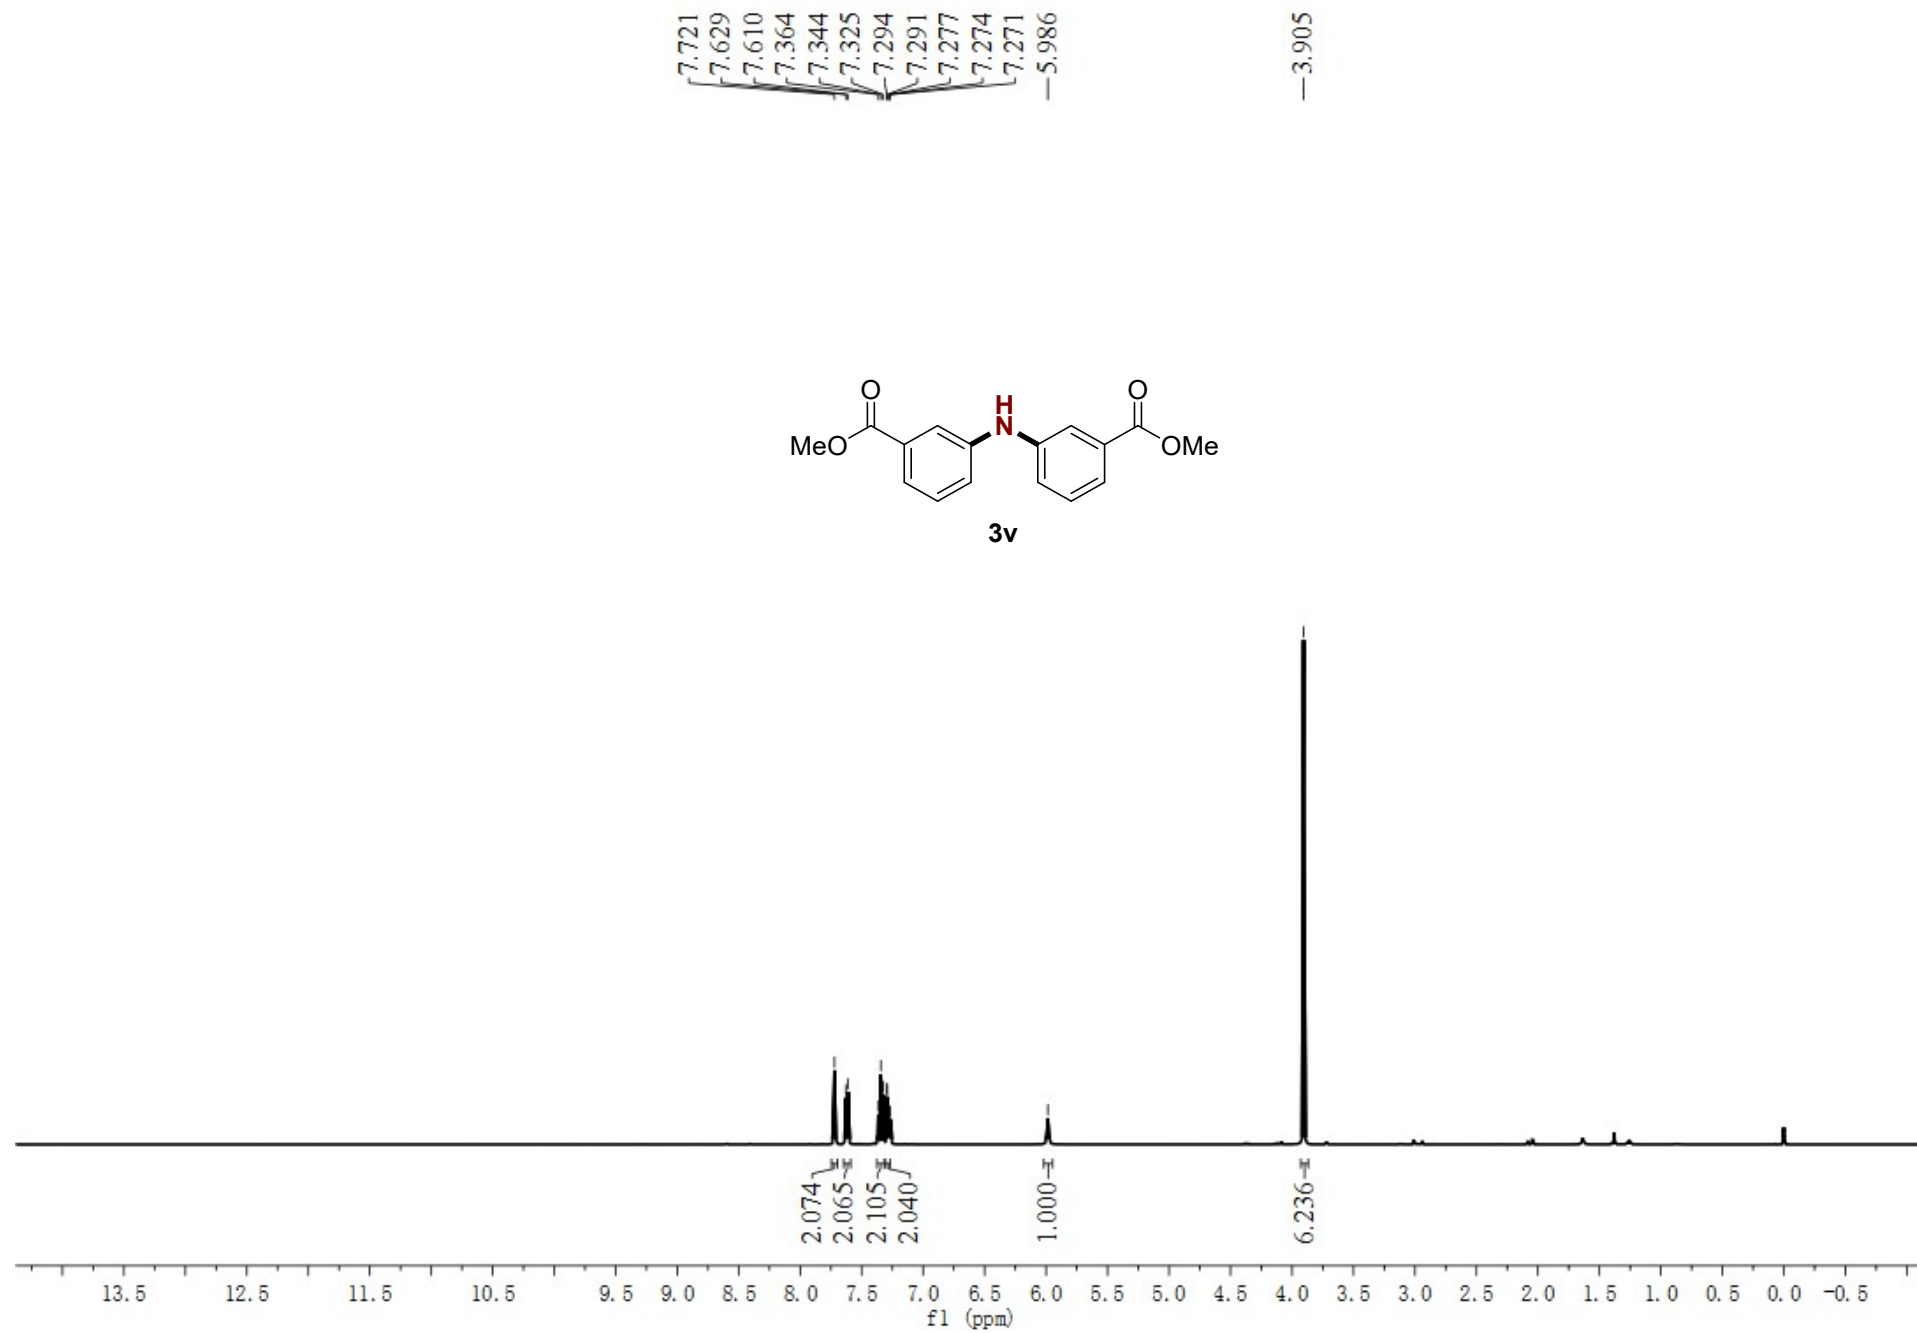

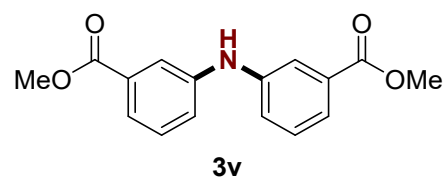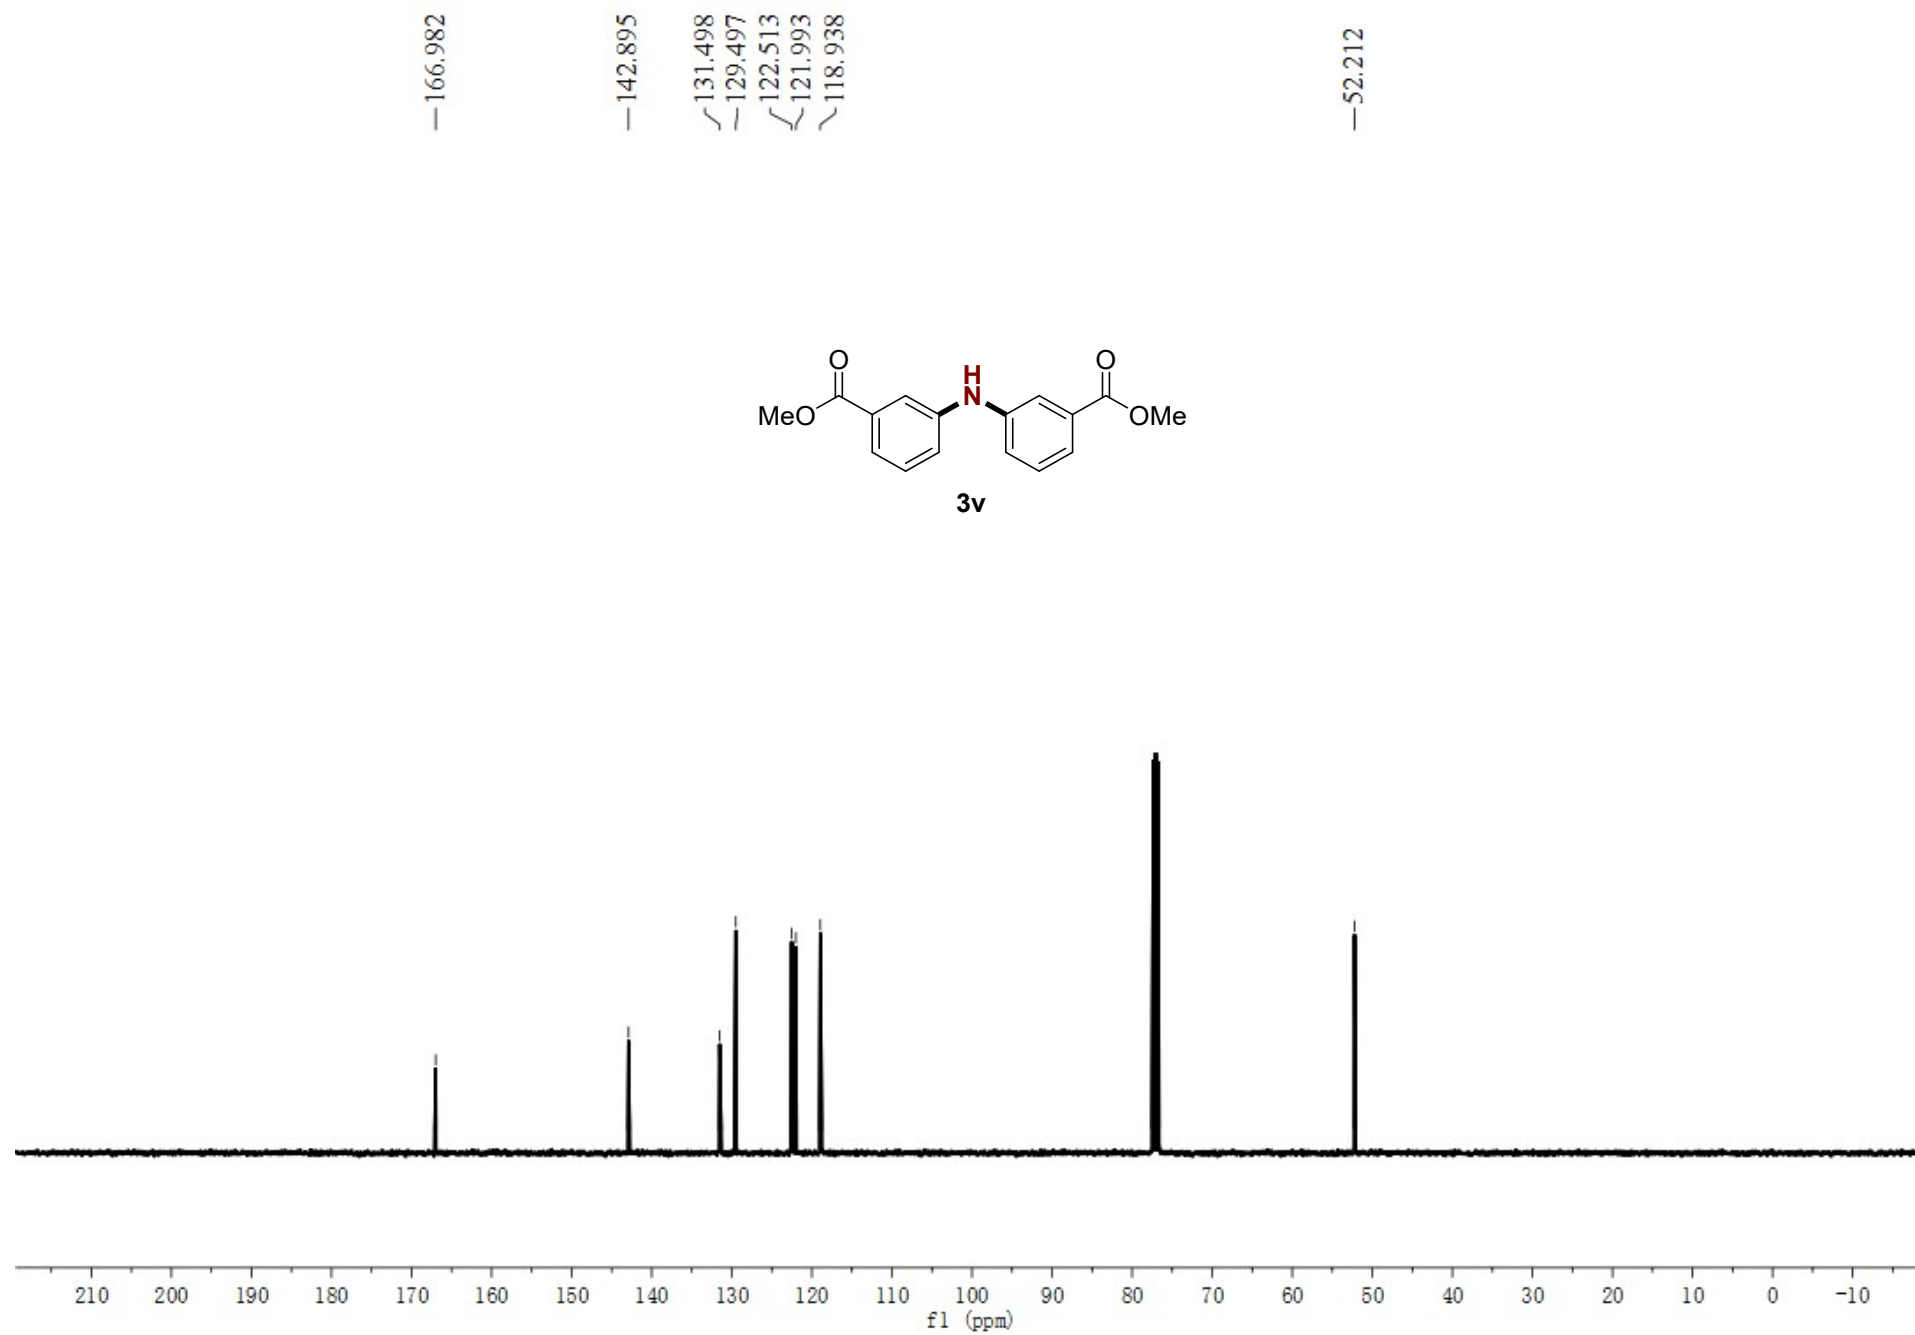

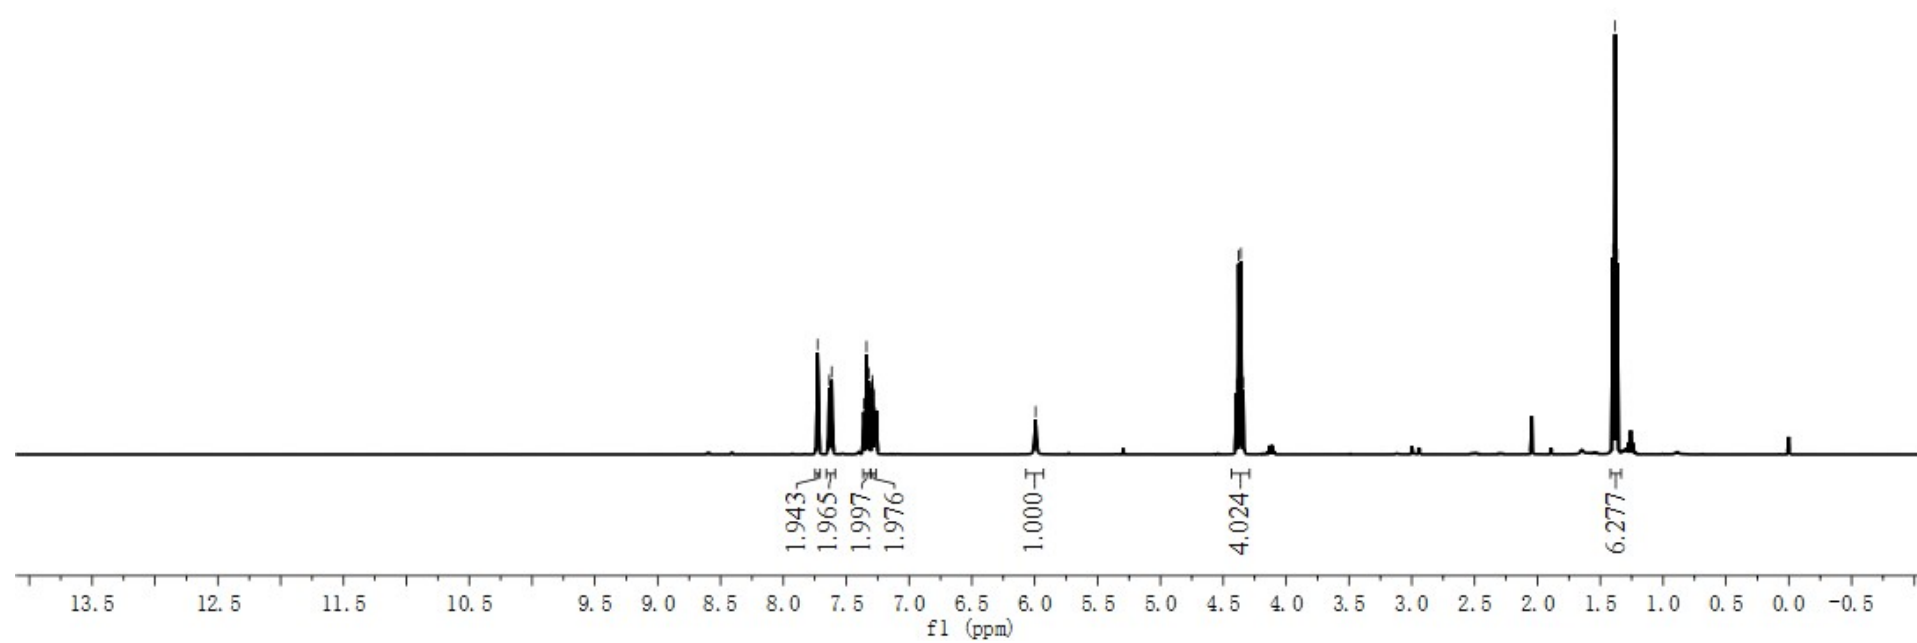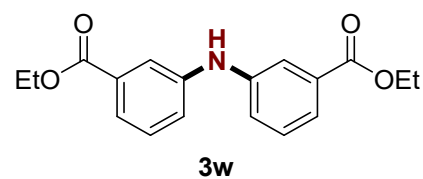

7.732  
7.728  
7.723  
7.638  
7.635  
7.632  
7.619  
7.616  
7.613  
7.359  
7.339  
7.320  
7.296  
7.293  
7.290  
7.287  
7.276  
7.273  
7.270  
7.267  
- 5.993

4.395  
4.377  
4.359  
4.341

1.400  
1.382  
1.364

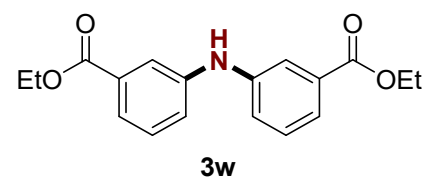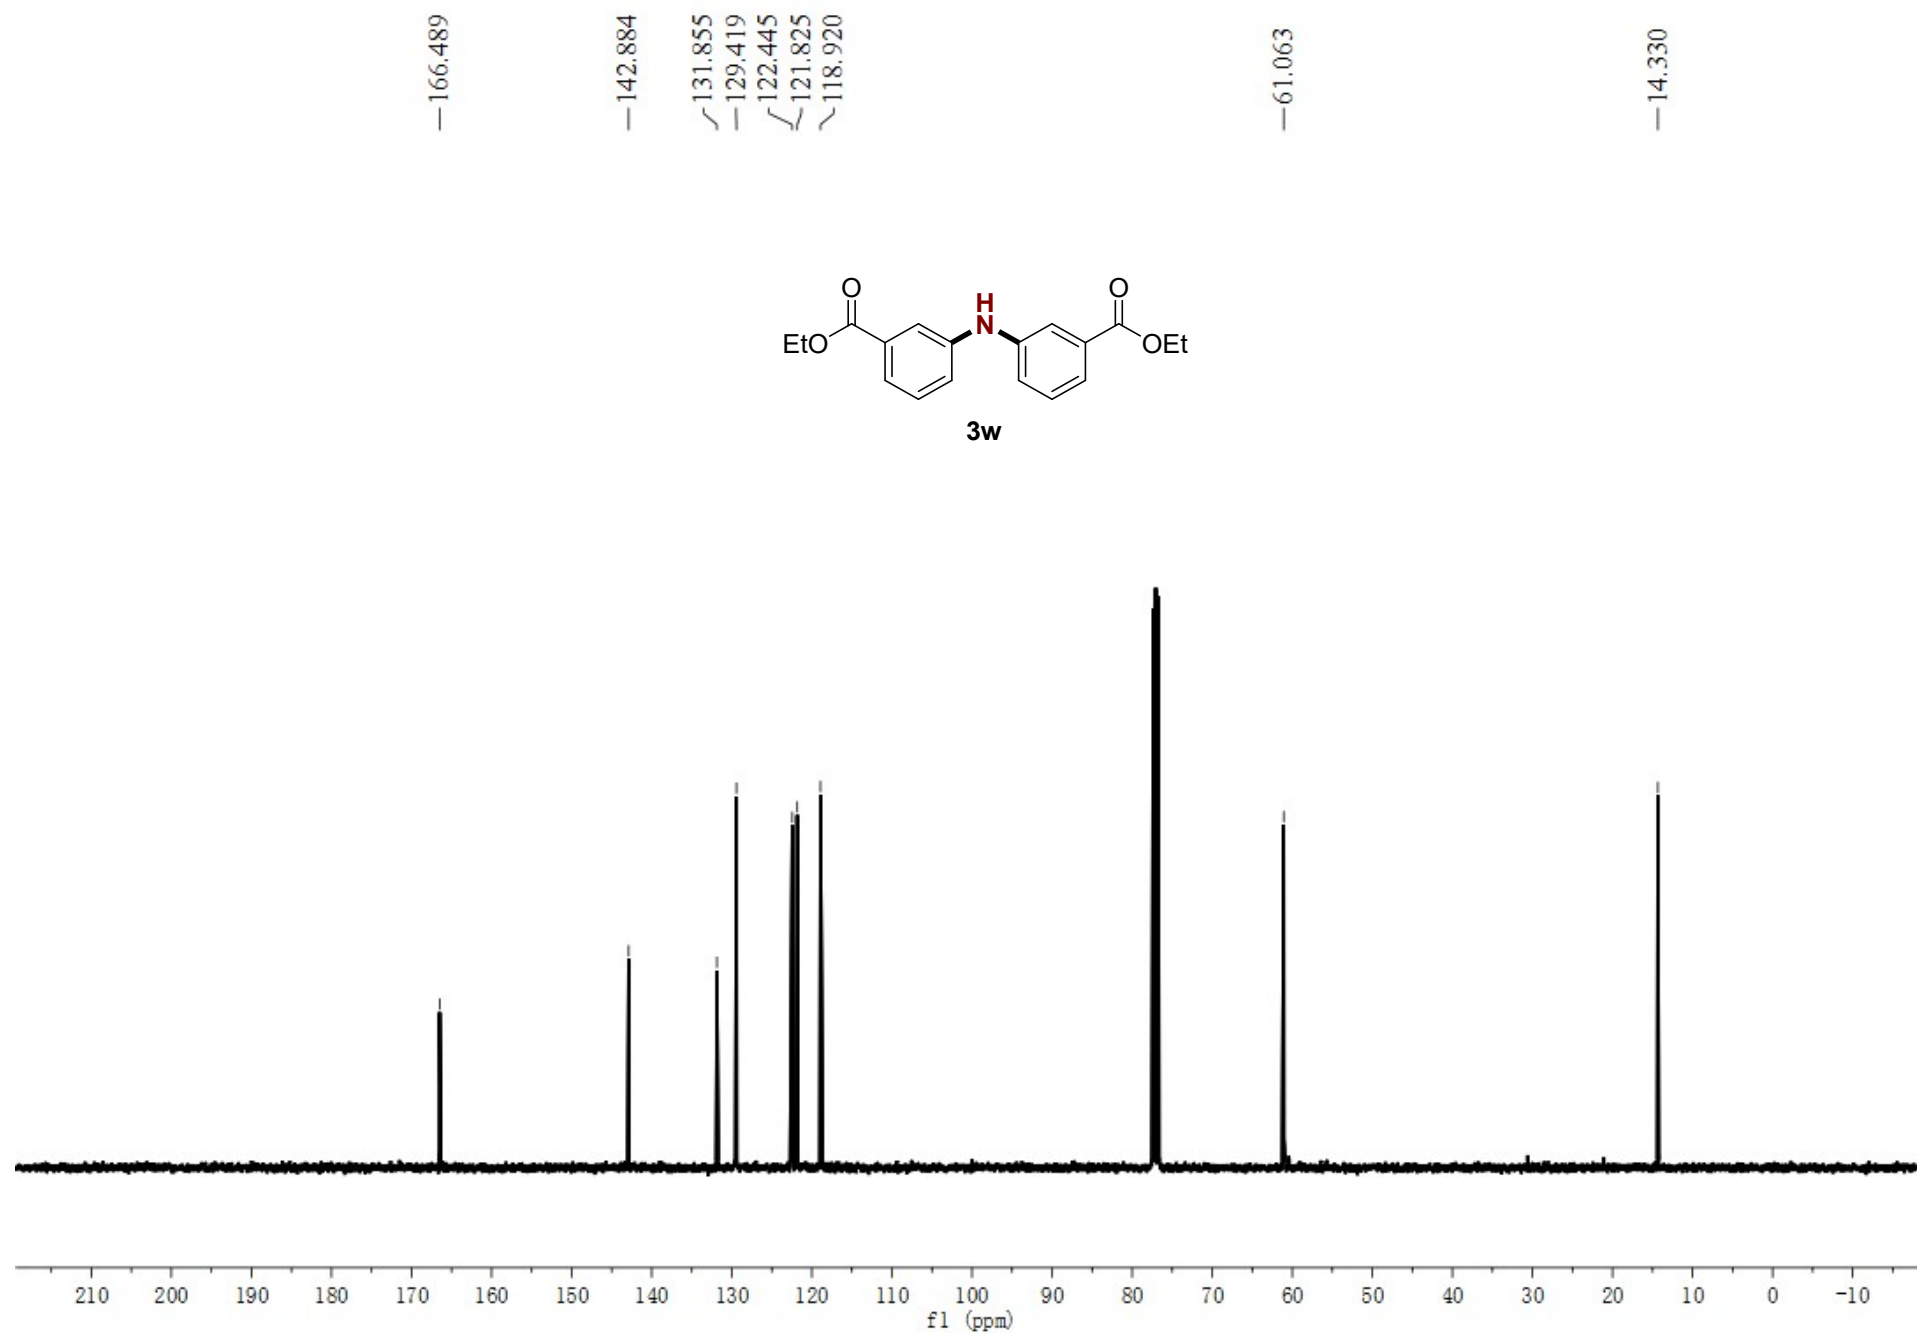

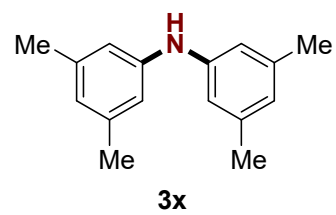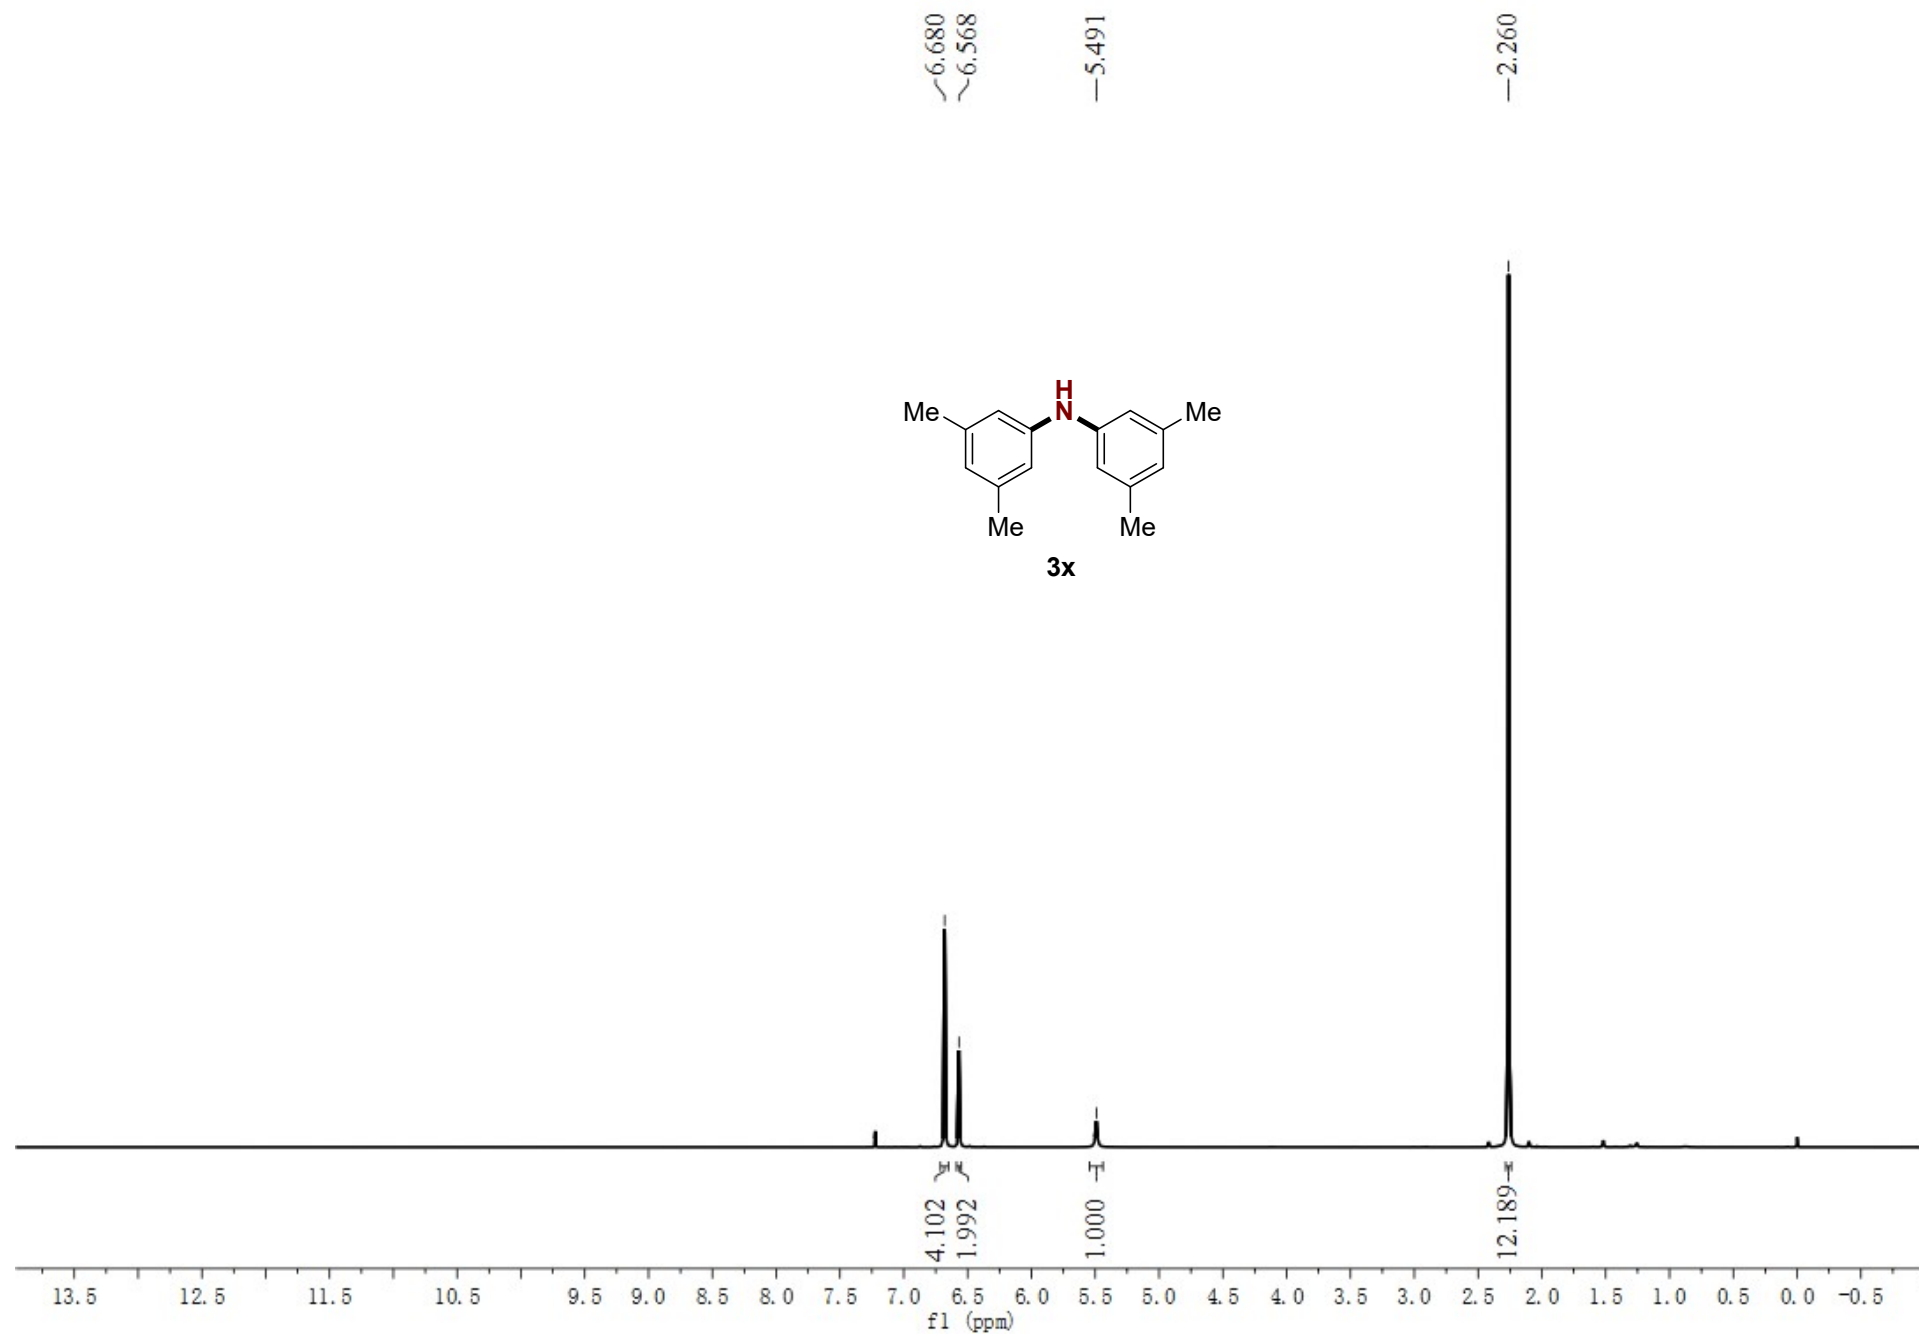

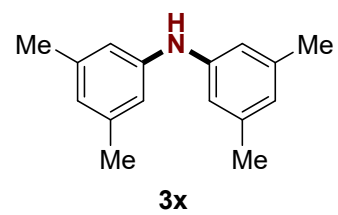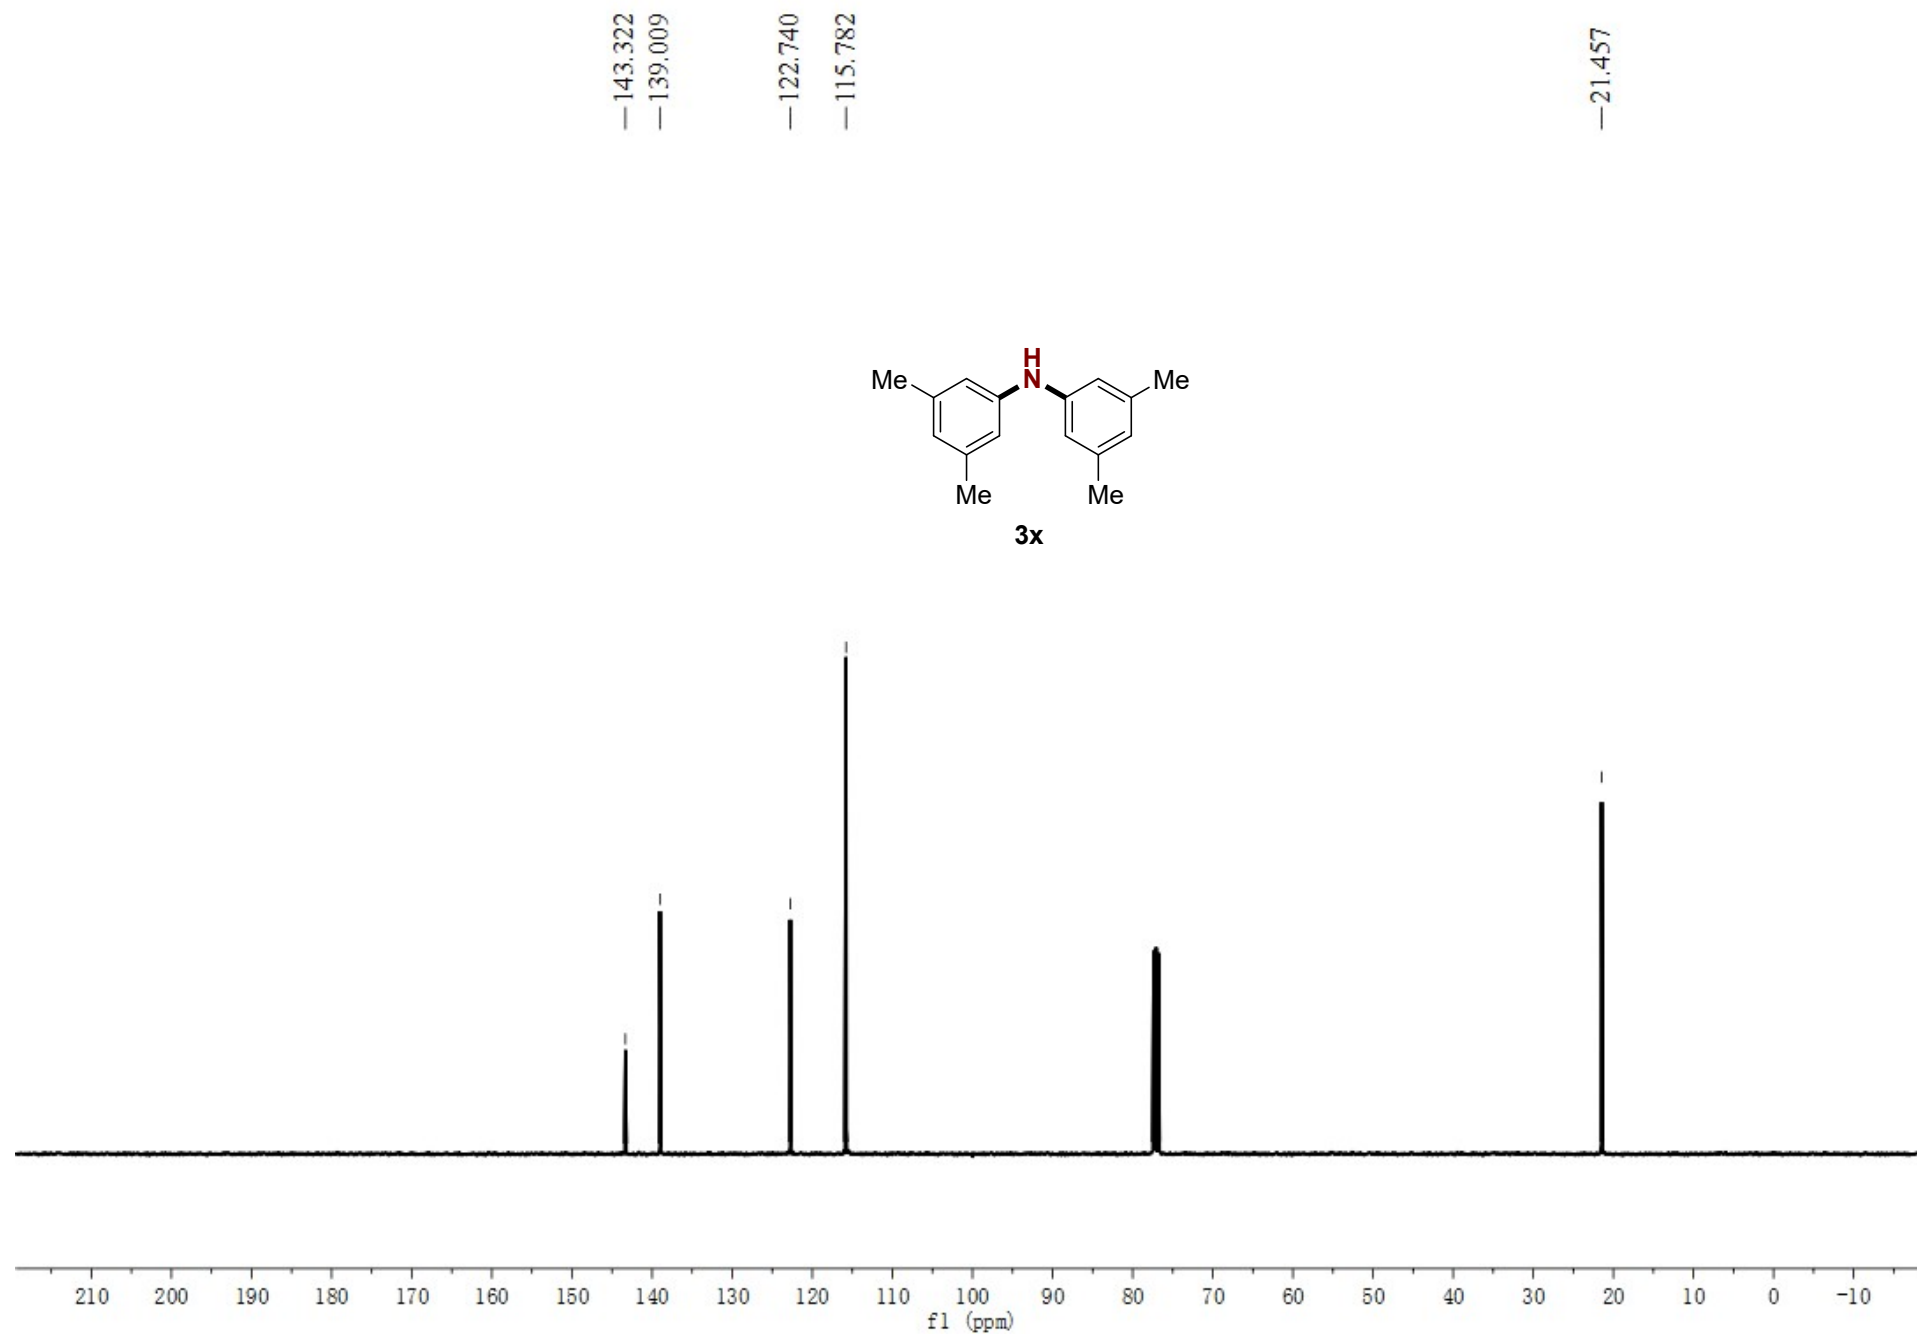

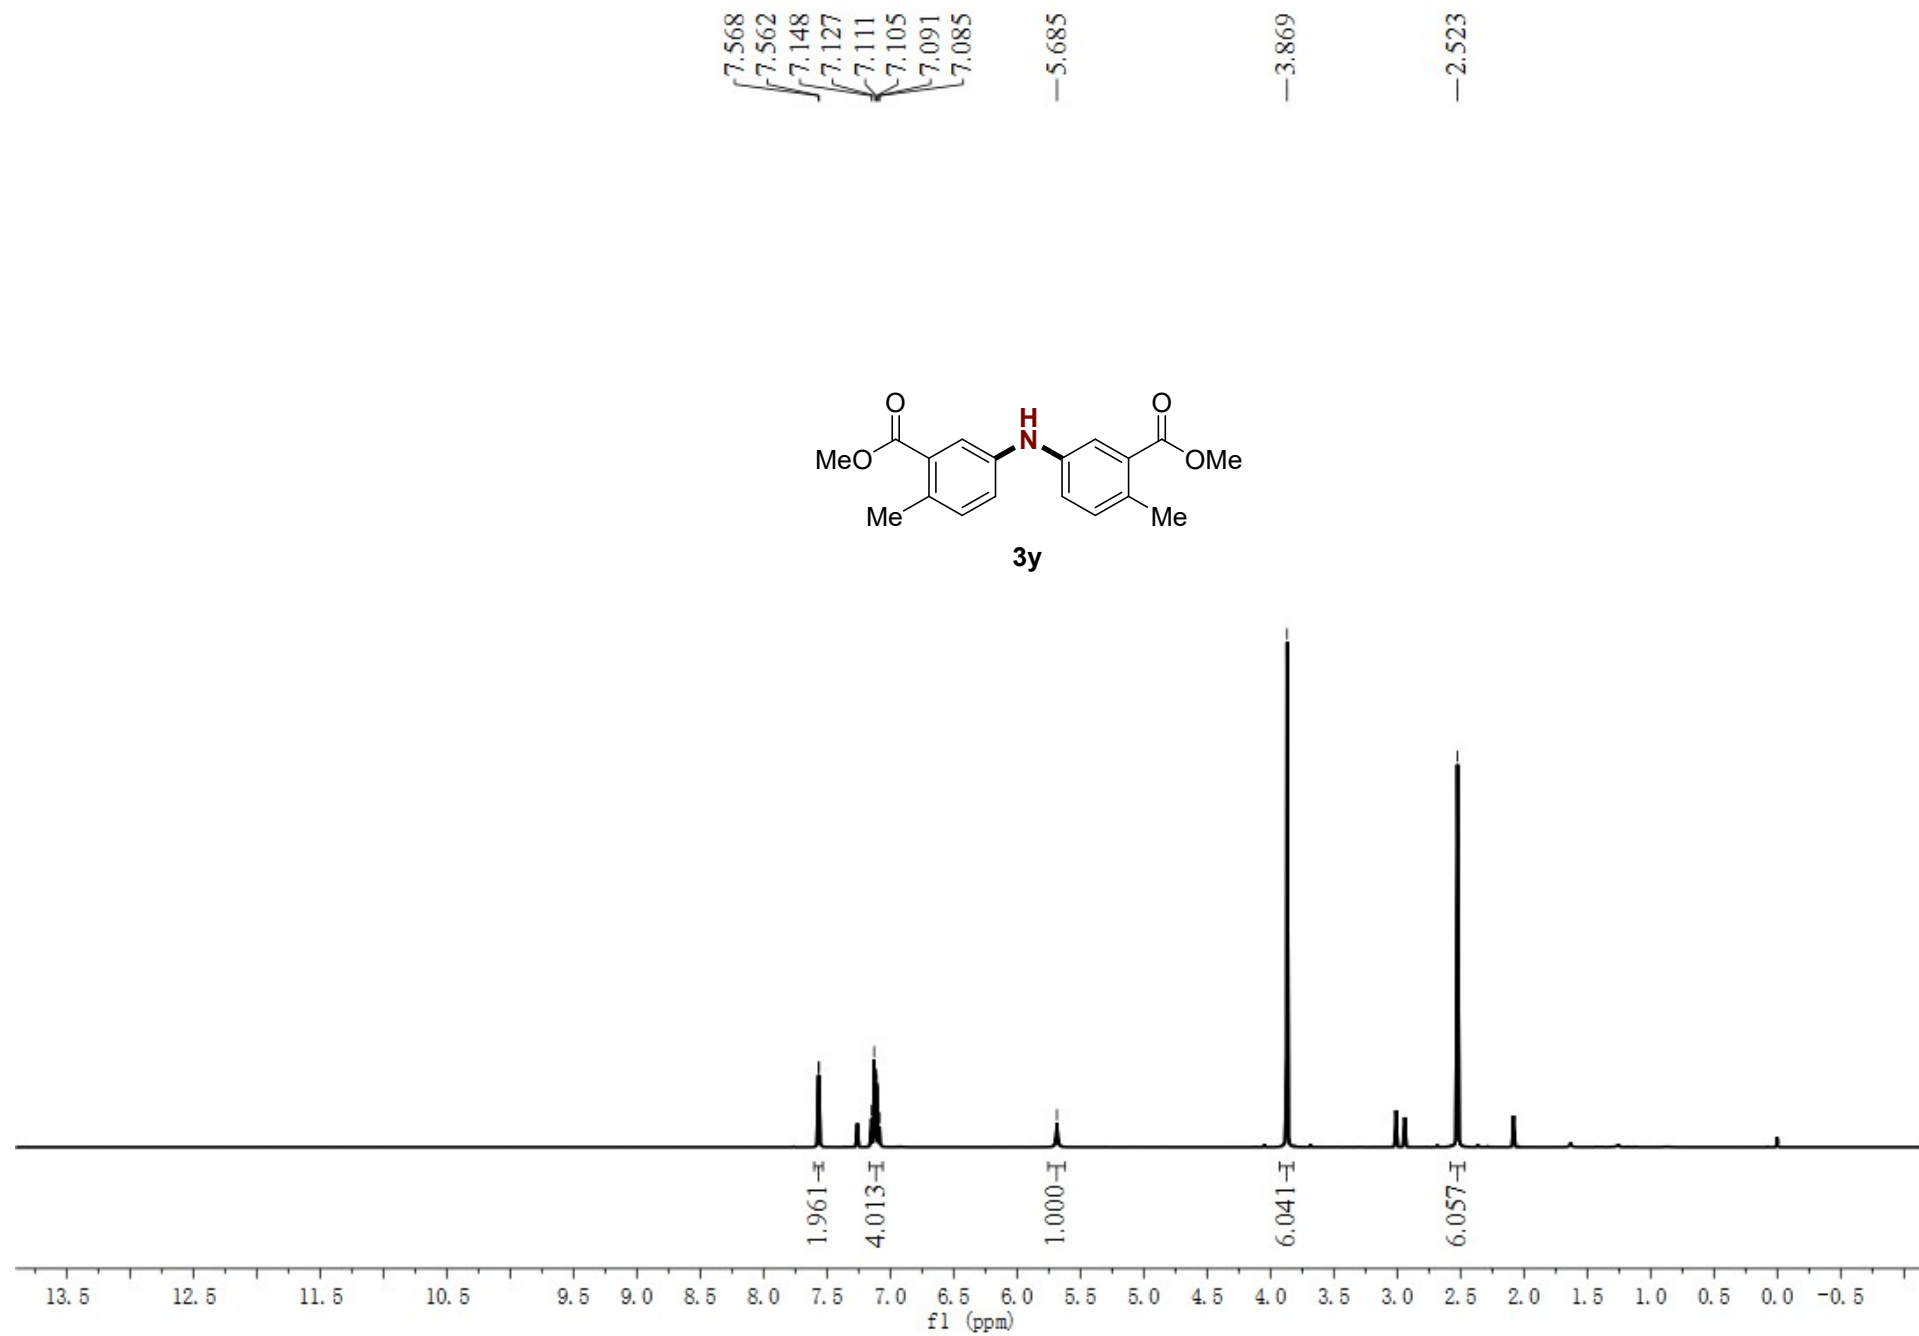

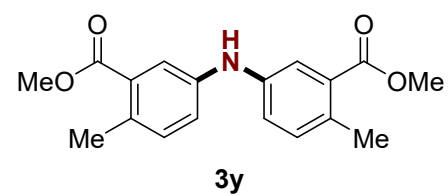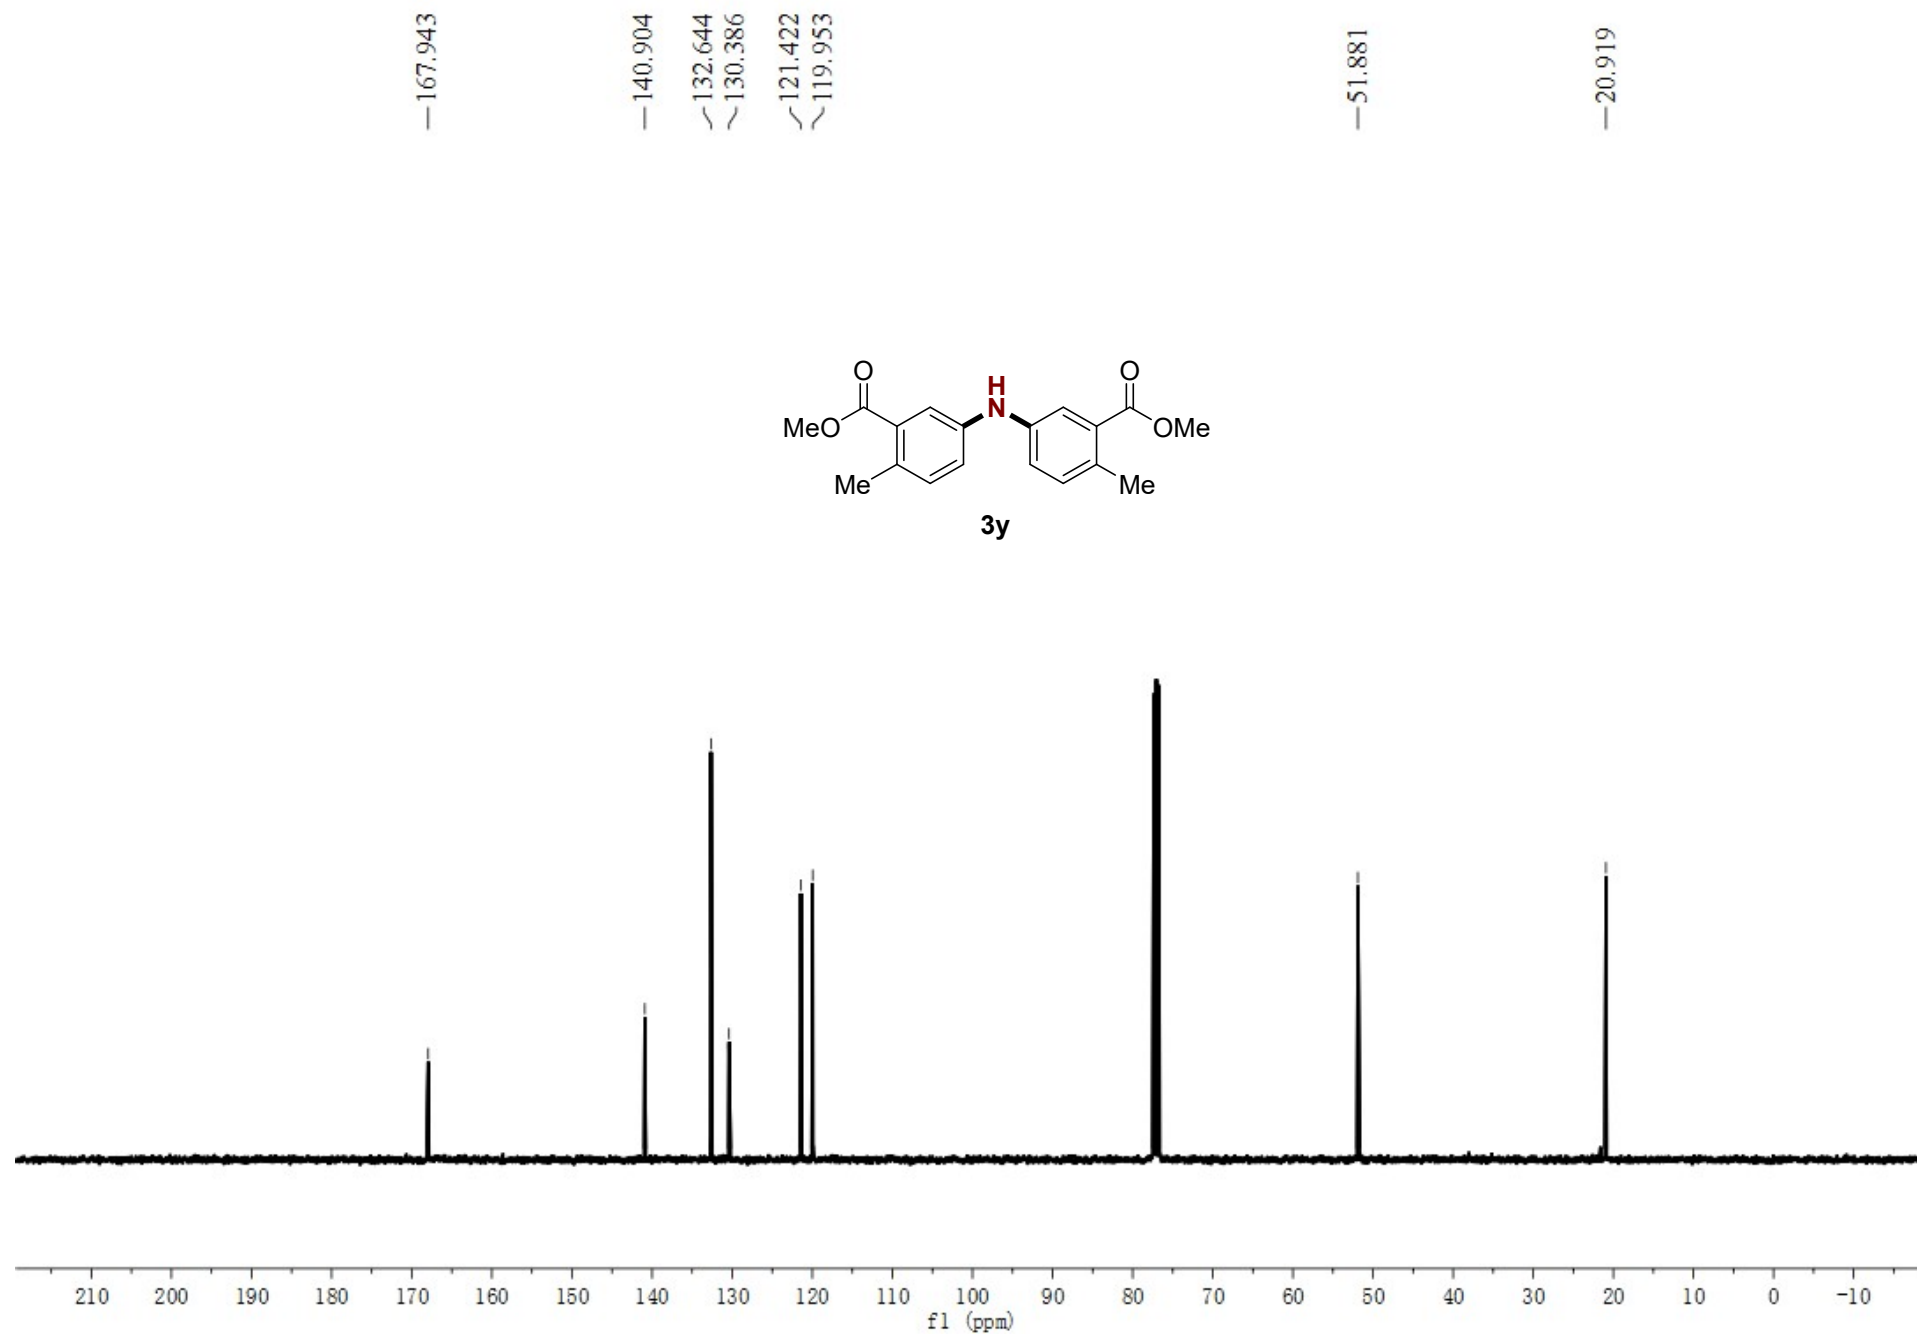

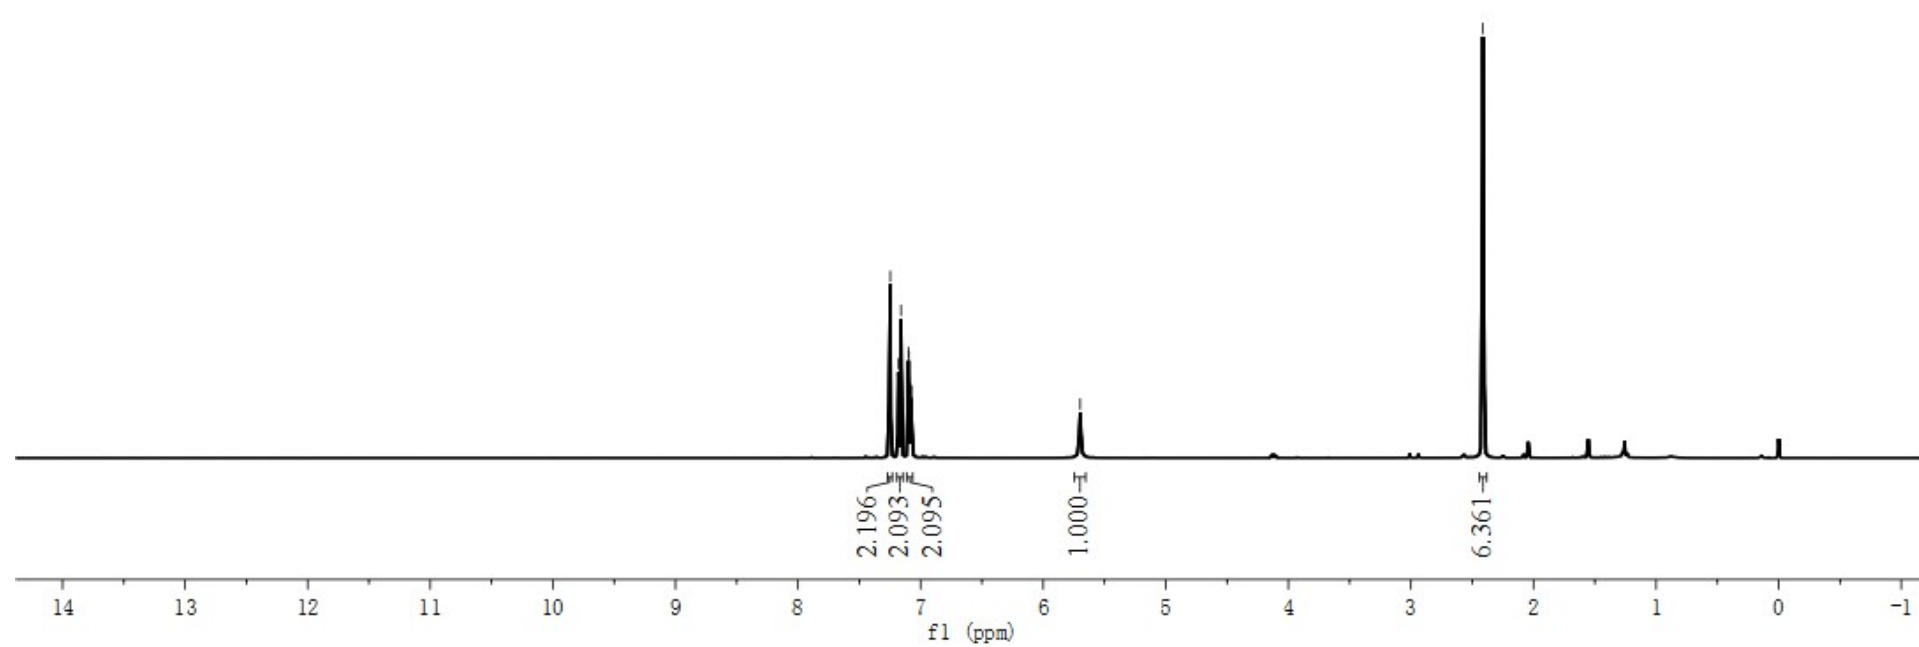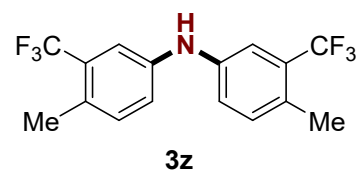

7.253  
7.247  
7.180  
7.160  
7.100  
7.094  
7.079  
7.074  
—5.698

—2.413

140.649  
133.029  
130.294  
129.996  
129.700  
129.402  
129.143  
129.126  
128.415  
125.693  
122.972  
120.563  
120.250  
115.621  
115.564  
115.507  
115.450

18.531  
18.510

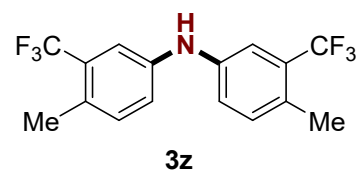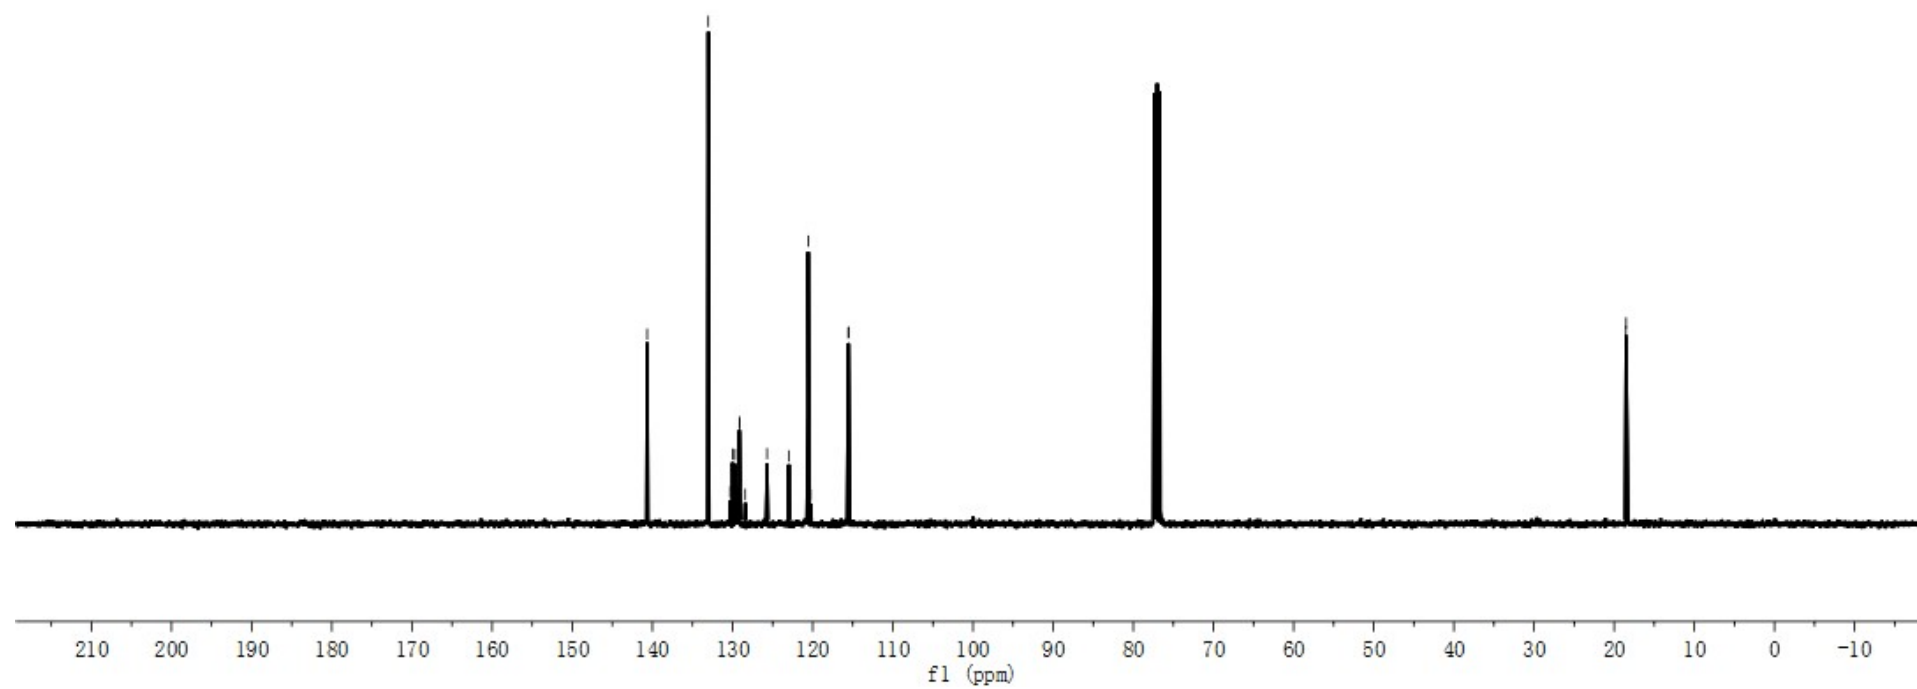

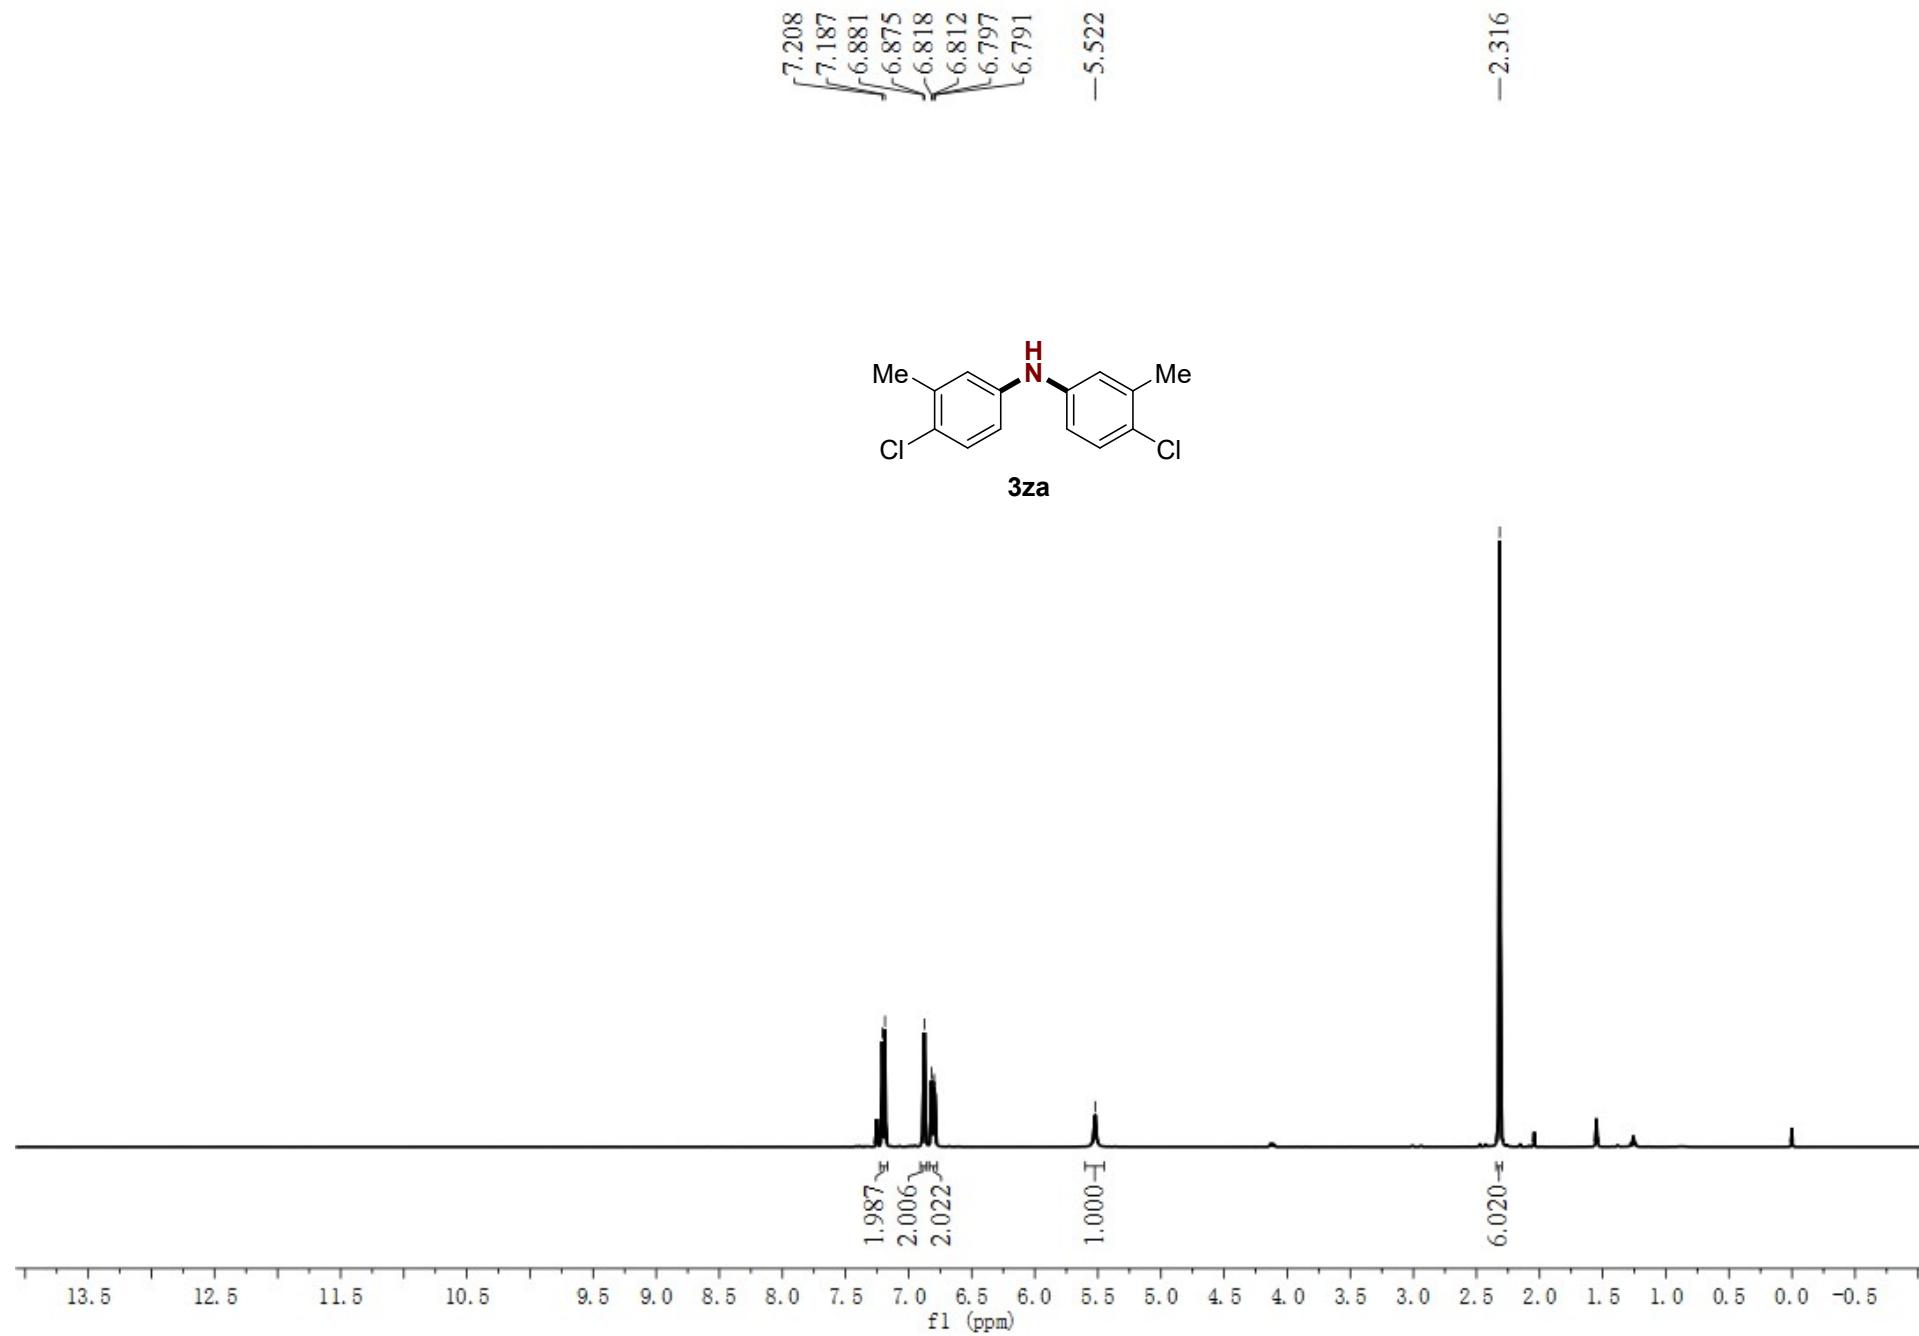

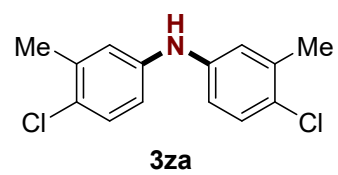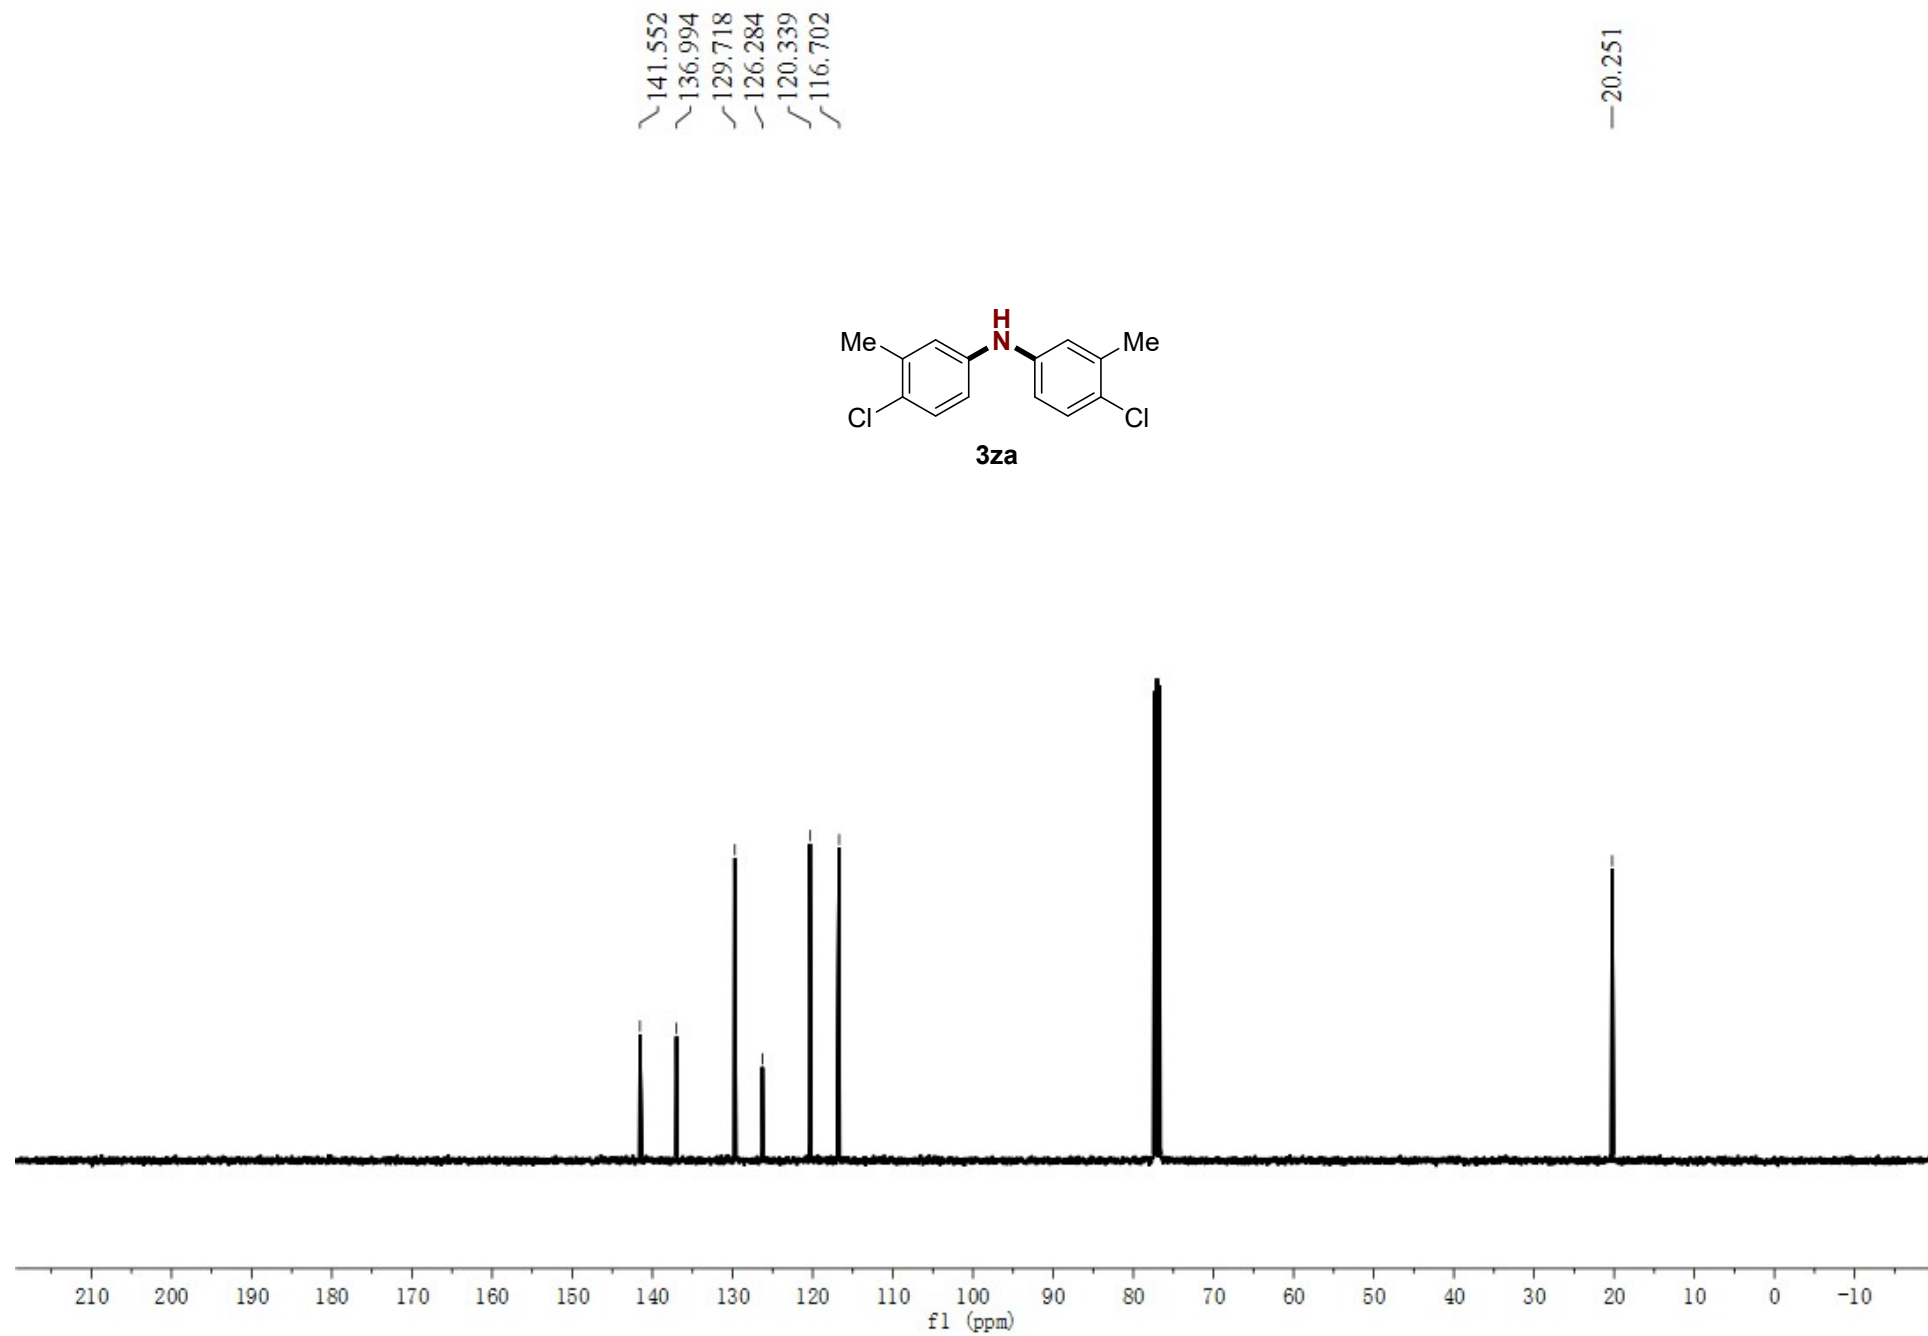

6.707  
6.686  
6.574  
6.568  
6.431  
6.425  
6.410  
6.405  
5.906

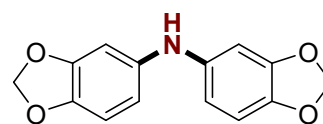

**3zb**

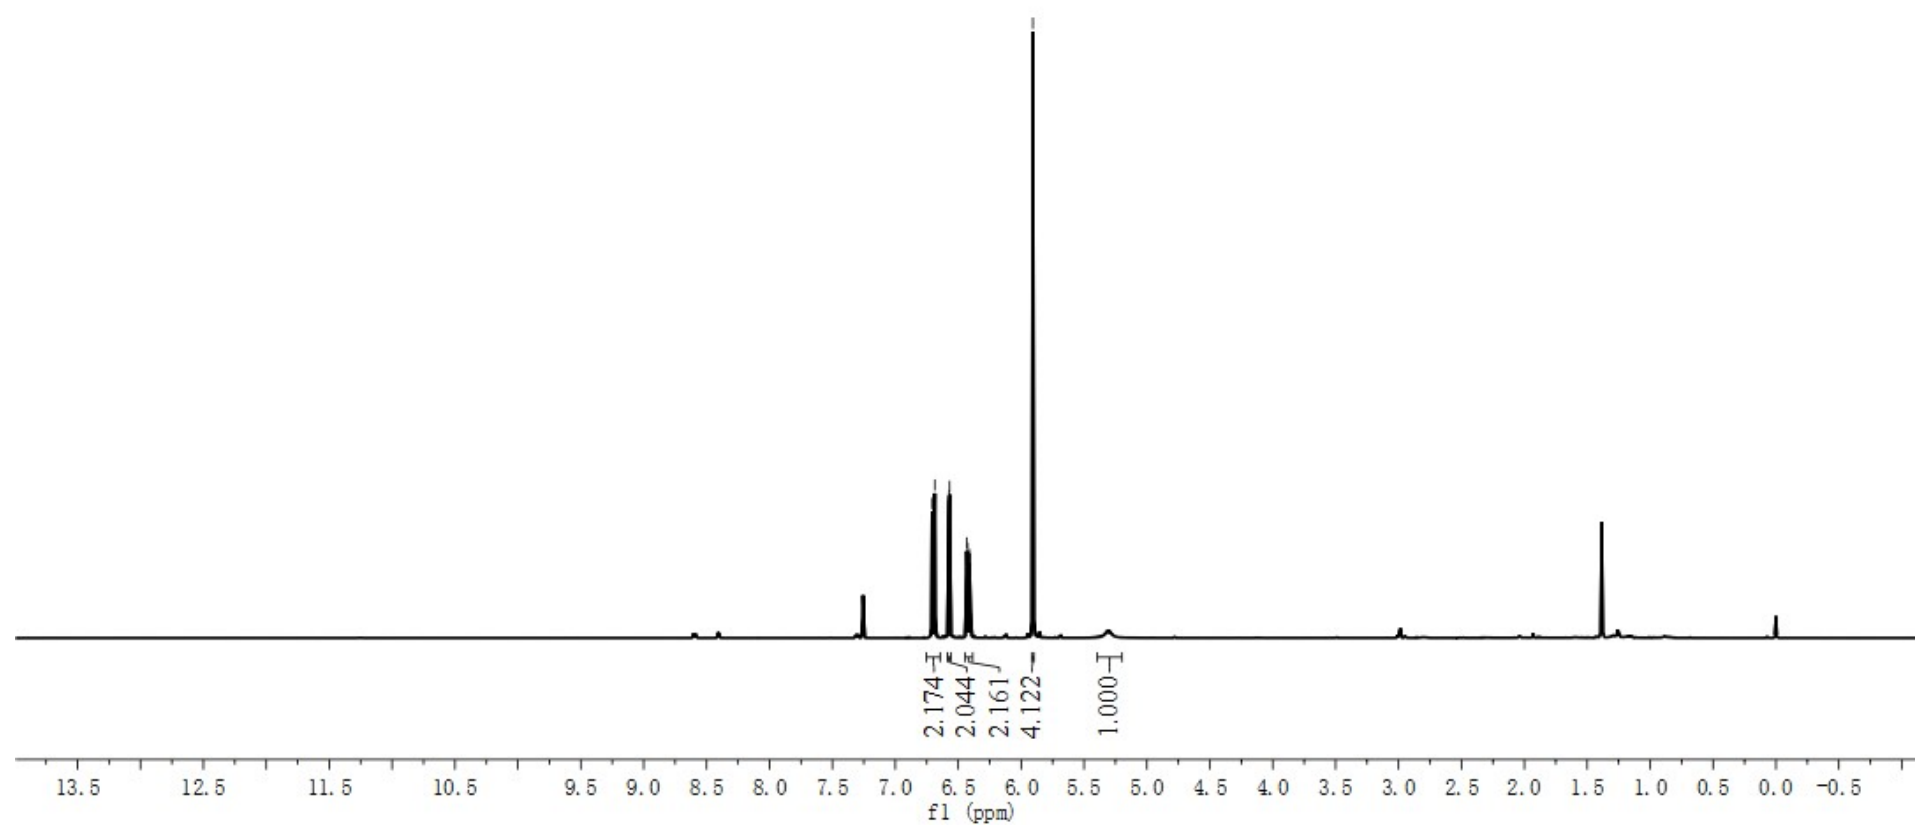

~148.269  
~142.148  
~139.055

~110.937  
~108.576  
~100.992  
~100.954

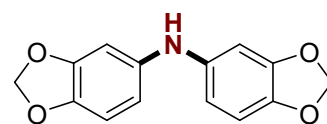

**3zb**

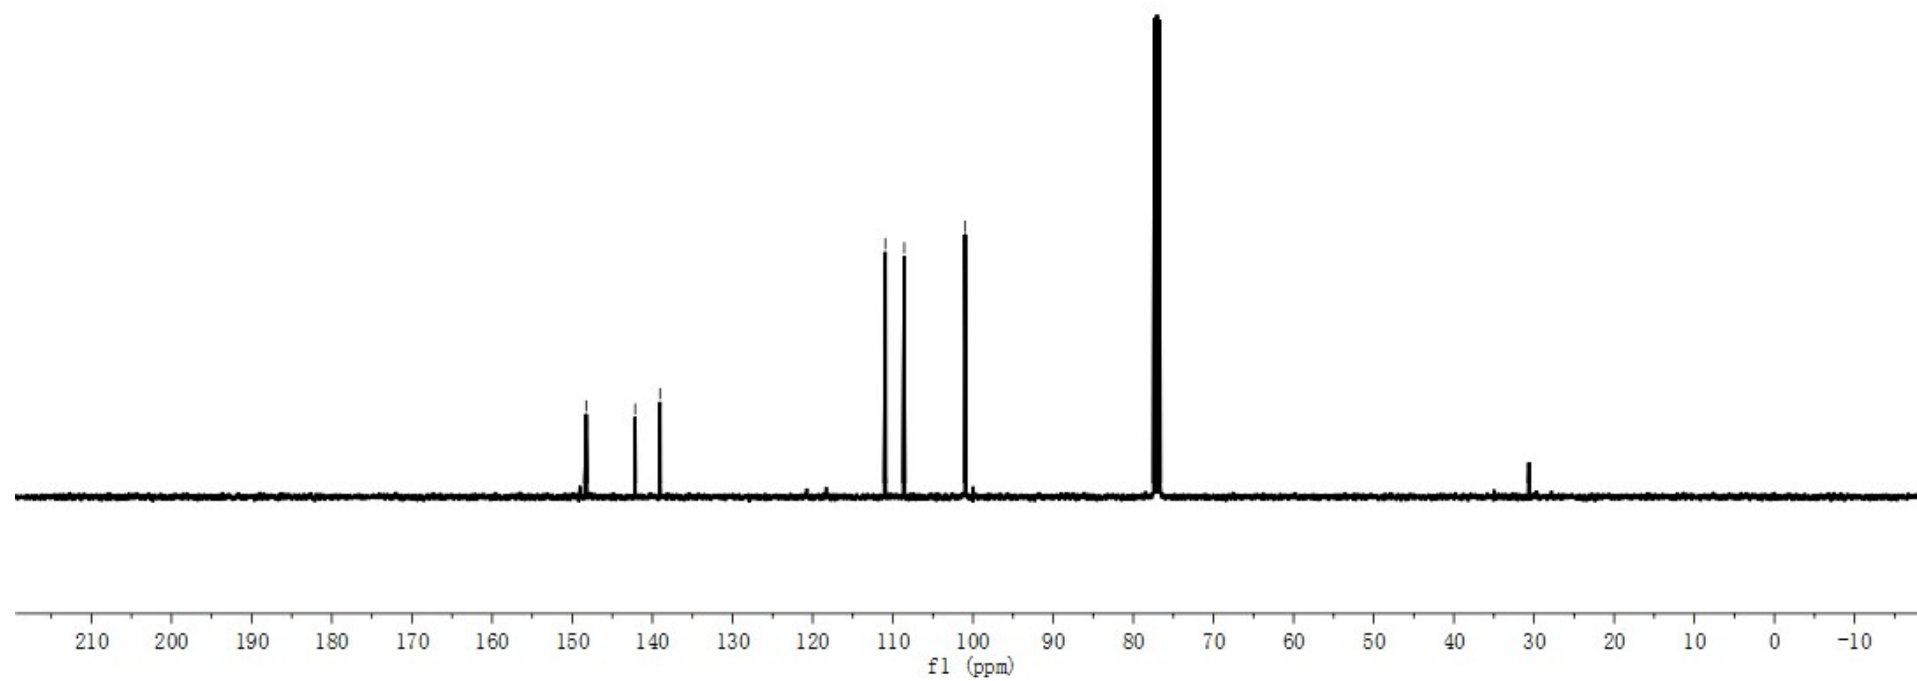

7.579  
7.574  
7.407  
7.385  
7.245  
7.239  
7.013  
7.007  
6.991  
6.986  
6.657  
6.654  
— 5.576

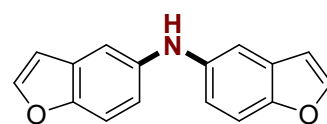

**3zc**

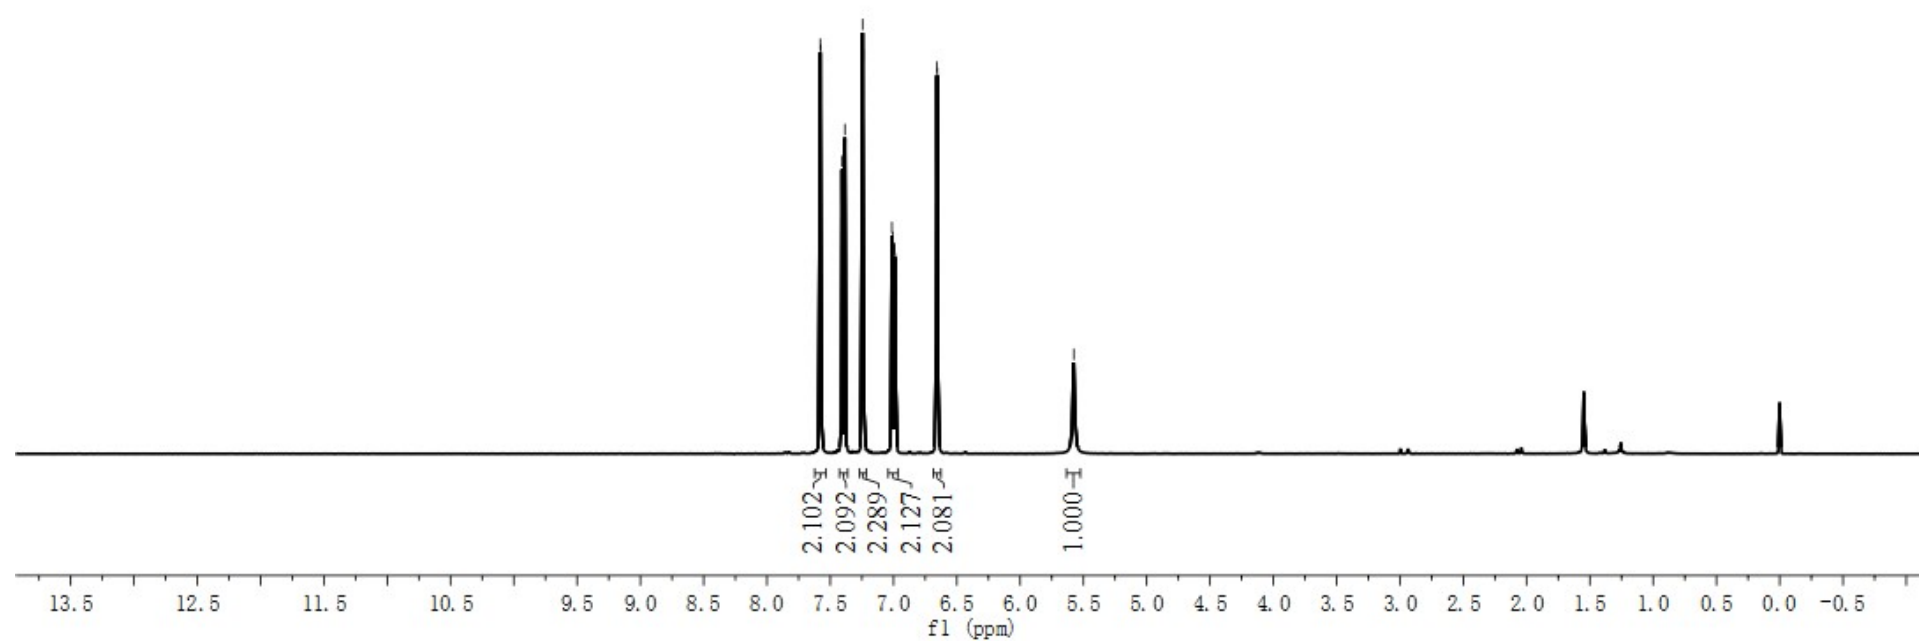

~150.722  
-145.633  
~140.236  
  
-128.271  
  
~116.956  
~111.867  
-109.752  
~106.489

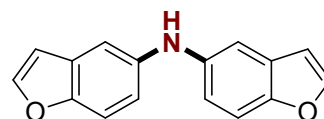

**3zc**

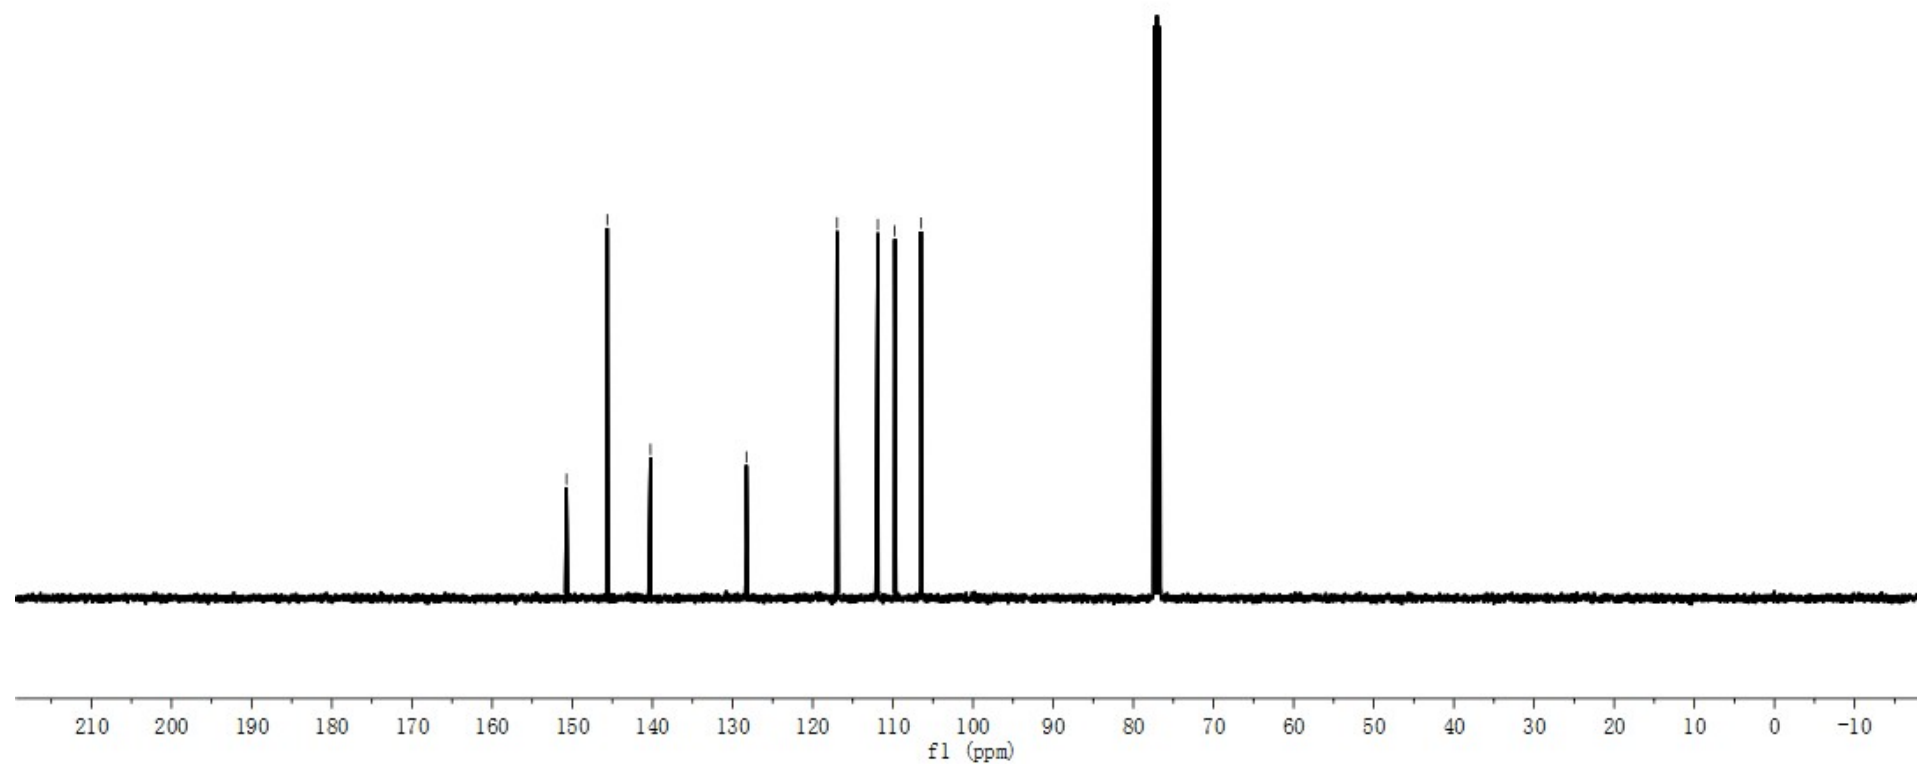

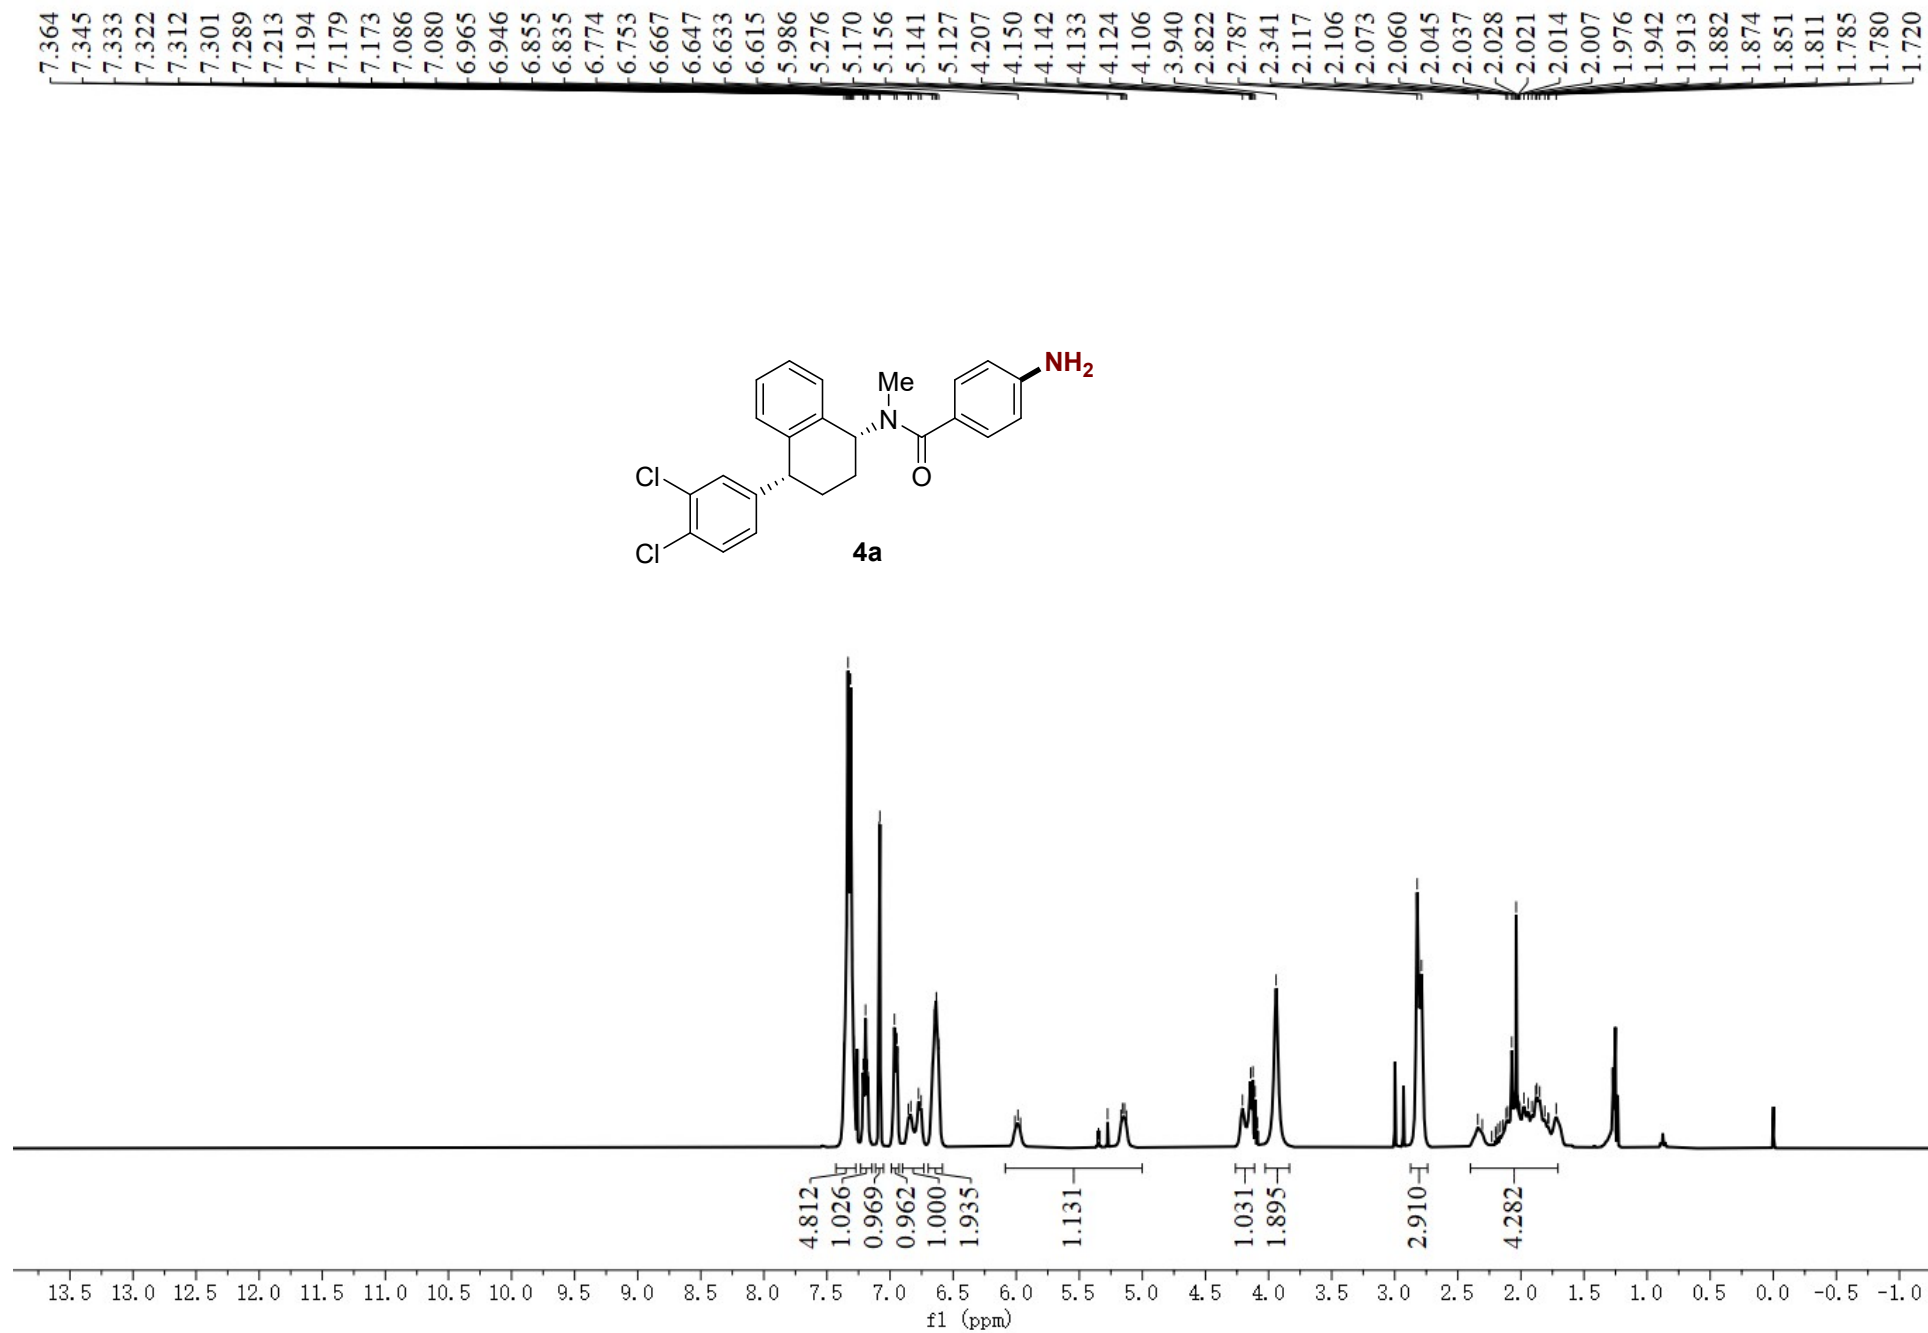

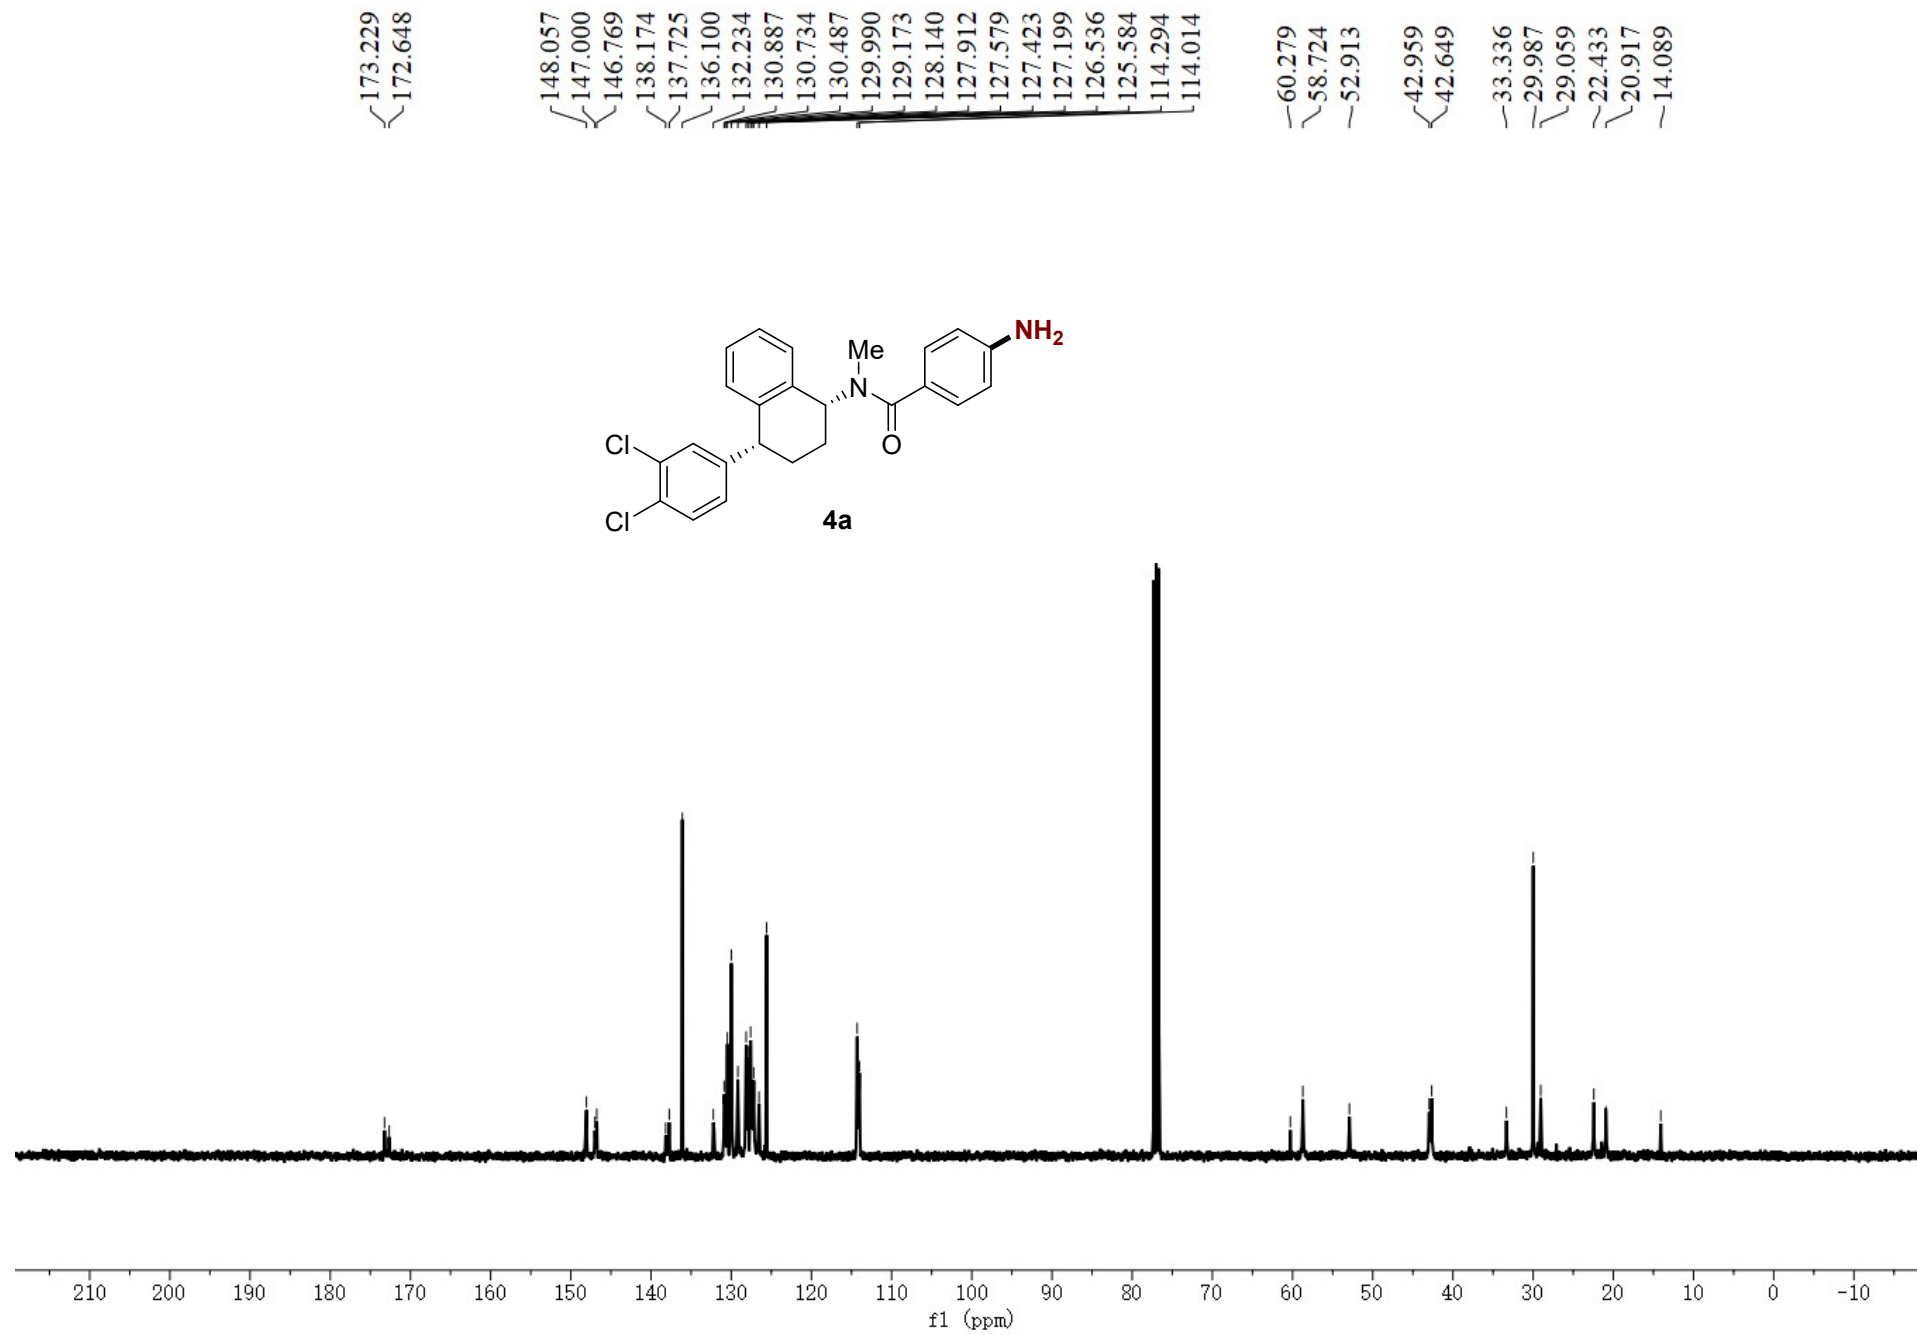

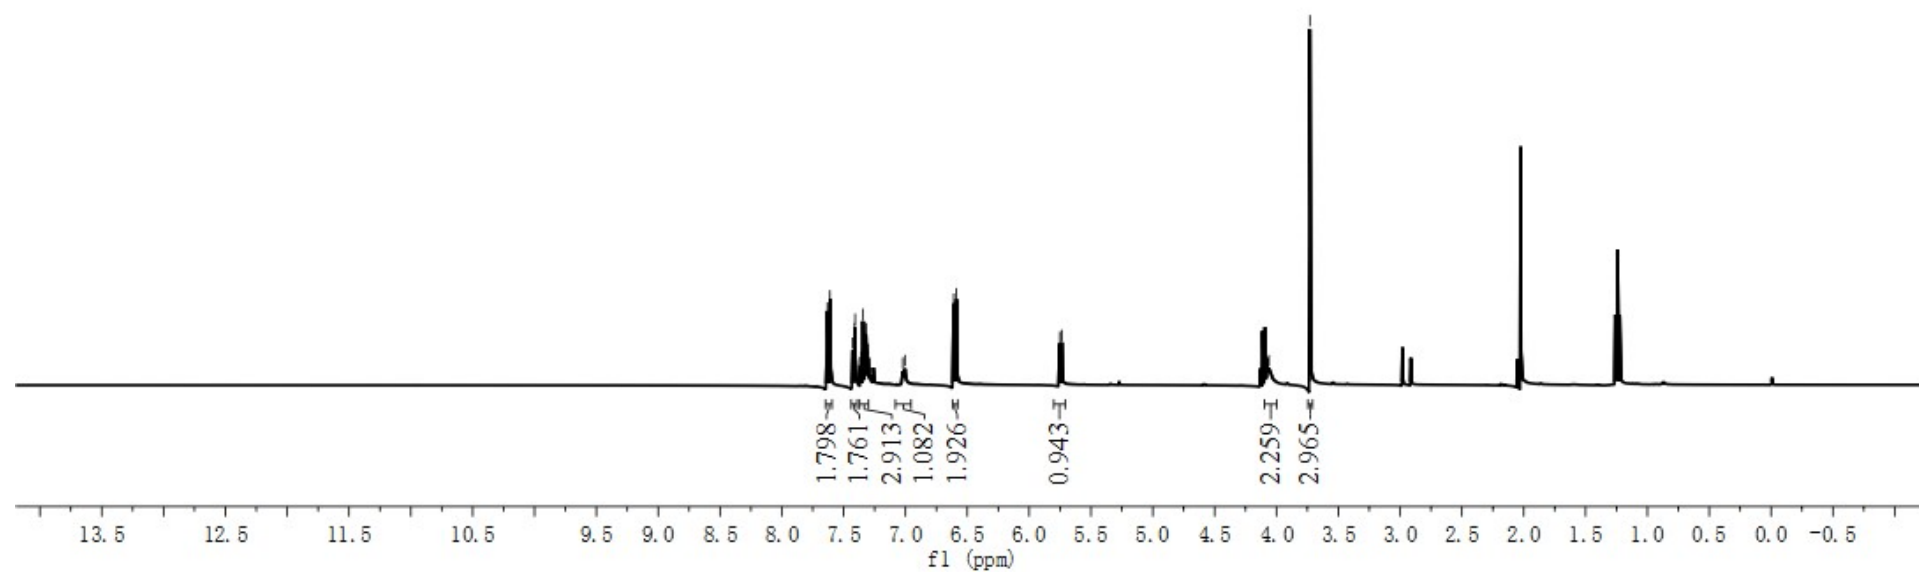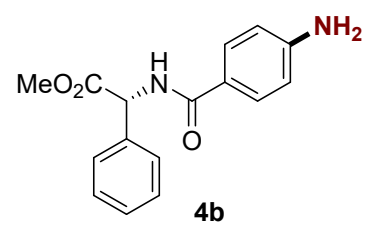

Chemical shift (ppm): 7.632, 7.627, 7.616, 7.611, 7.604, 7.432, 7.427, 7.415, 7.411, 7.407, 7.401, 7.366, 7.361, 7.347, 7.345, 7.341, 7.338, 7.330, 7.327, 7.325, 7.320, 7.315, 7.310, 7.304, 7.302, 7.005, 6.610, 6.605, 6.593, 6.588, 5.782, 5.753, 5.736, -4.061, -3.730

—171.686  
—166.309

—150.077

136.753  
128.880  
128.861  
128.379  
127.248  
122.657  
—113.931

—56.642  
—52.706

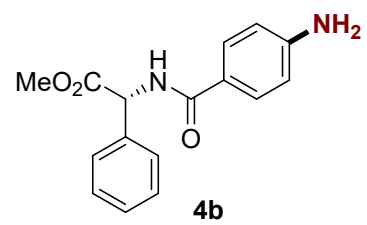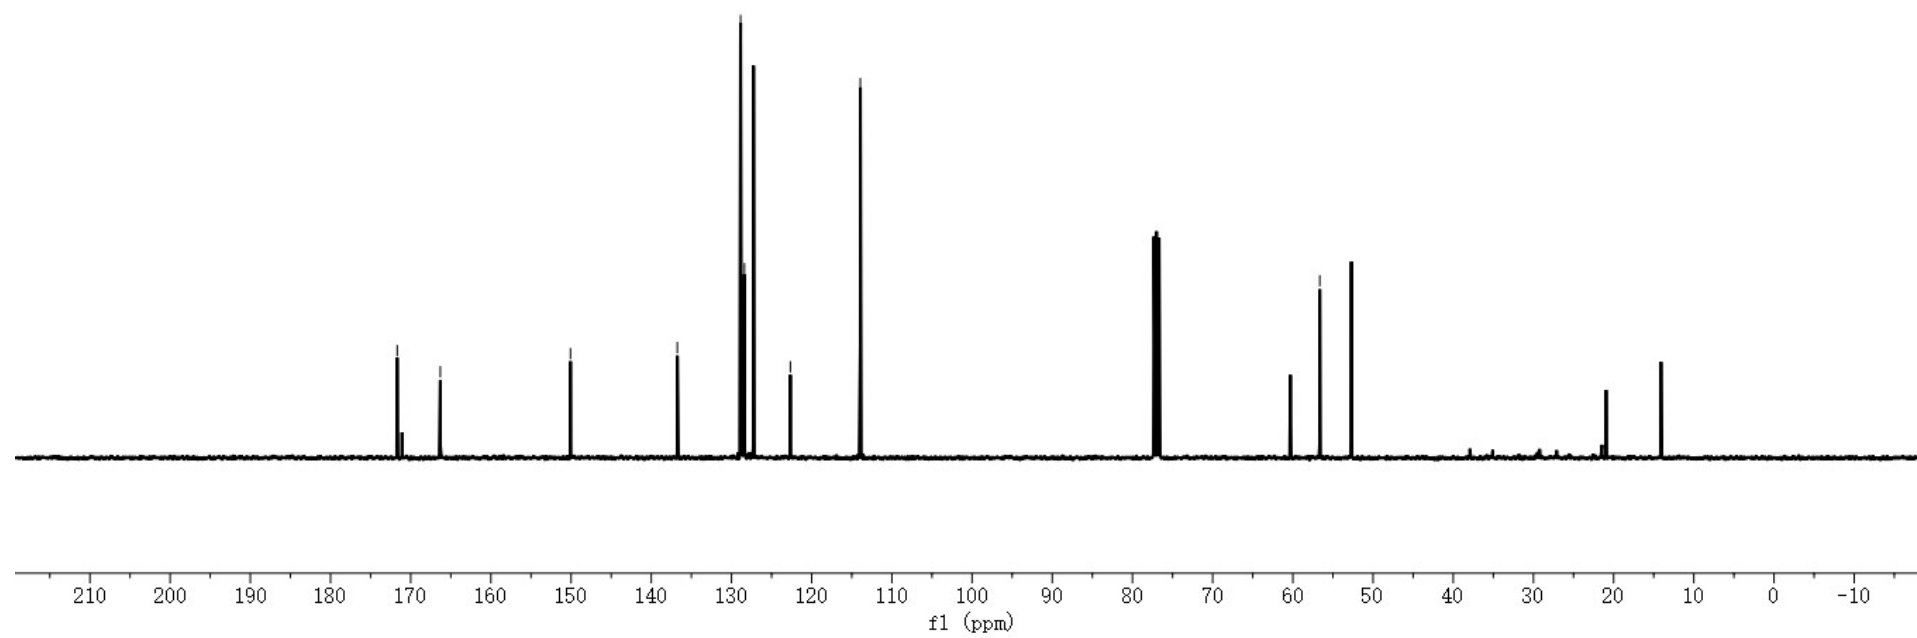

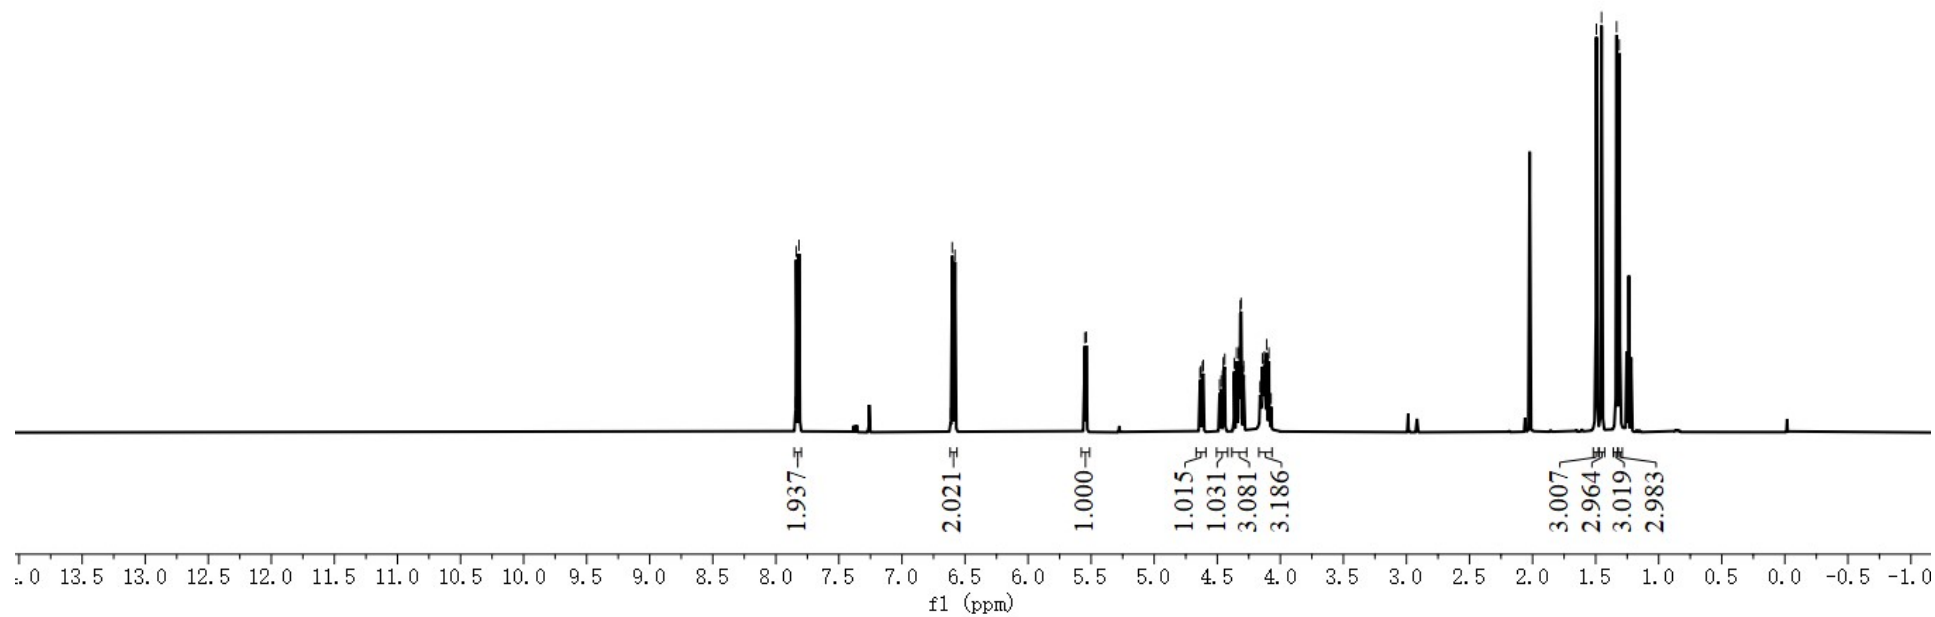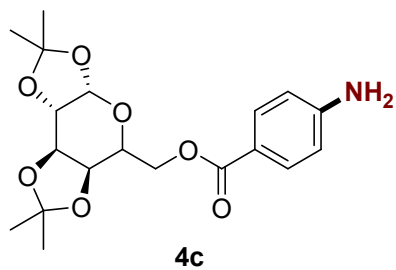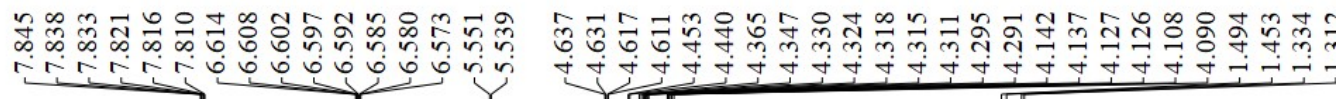

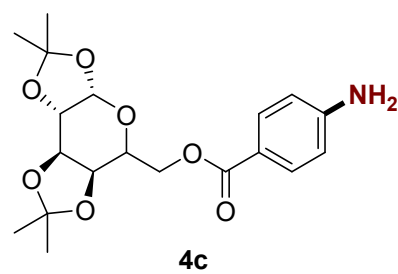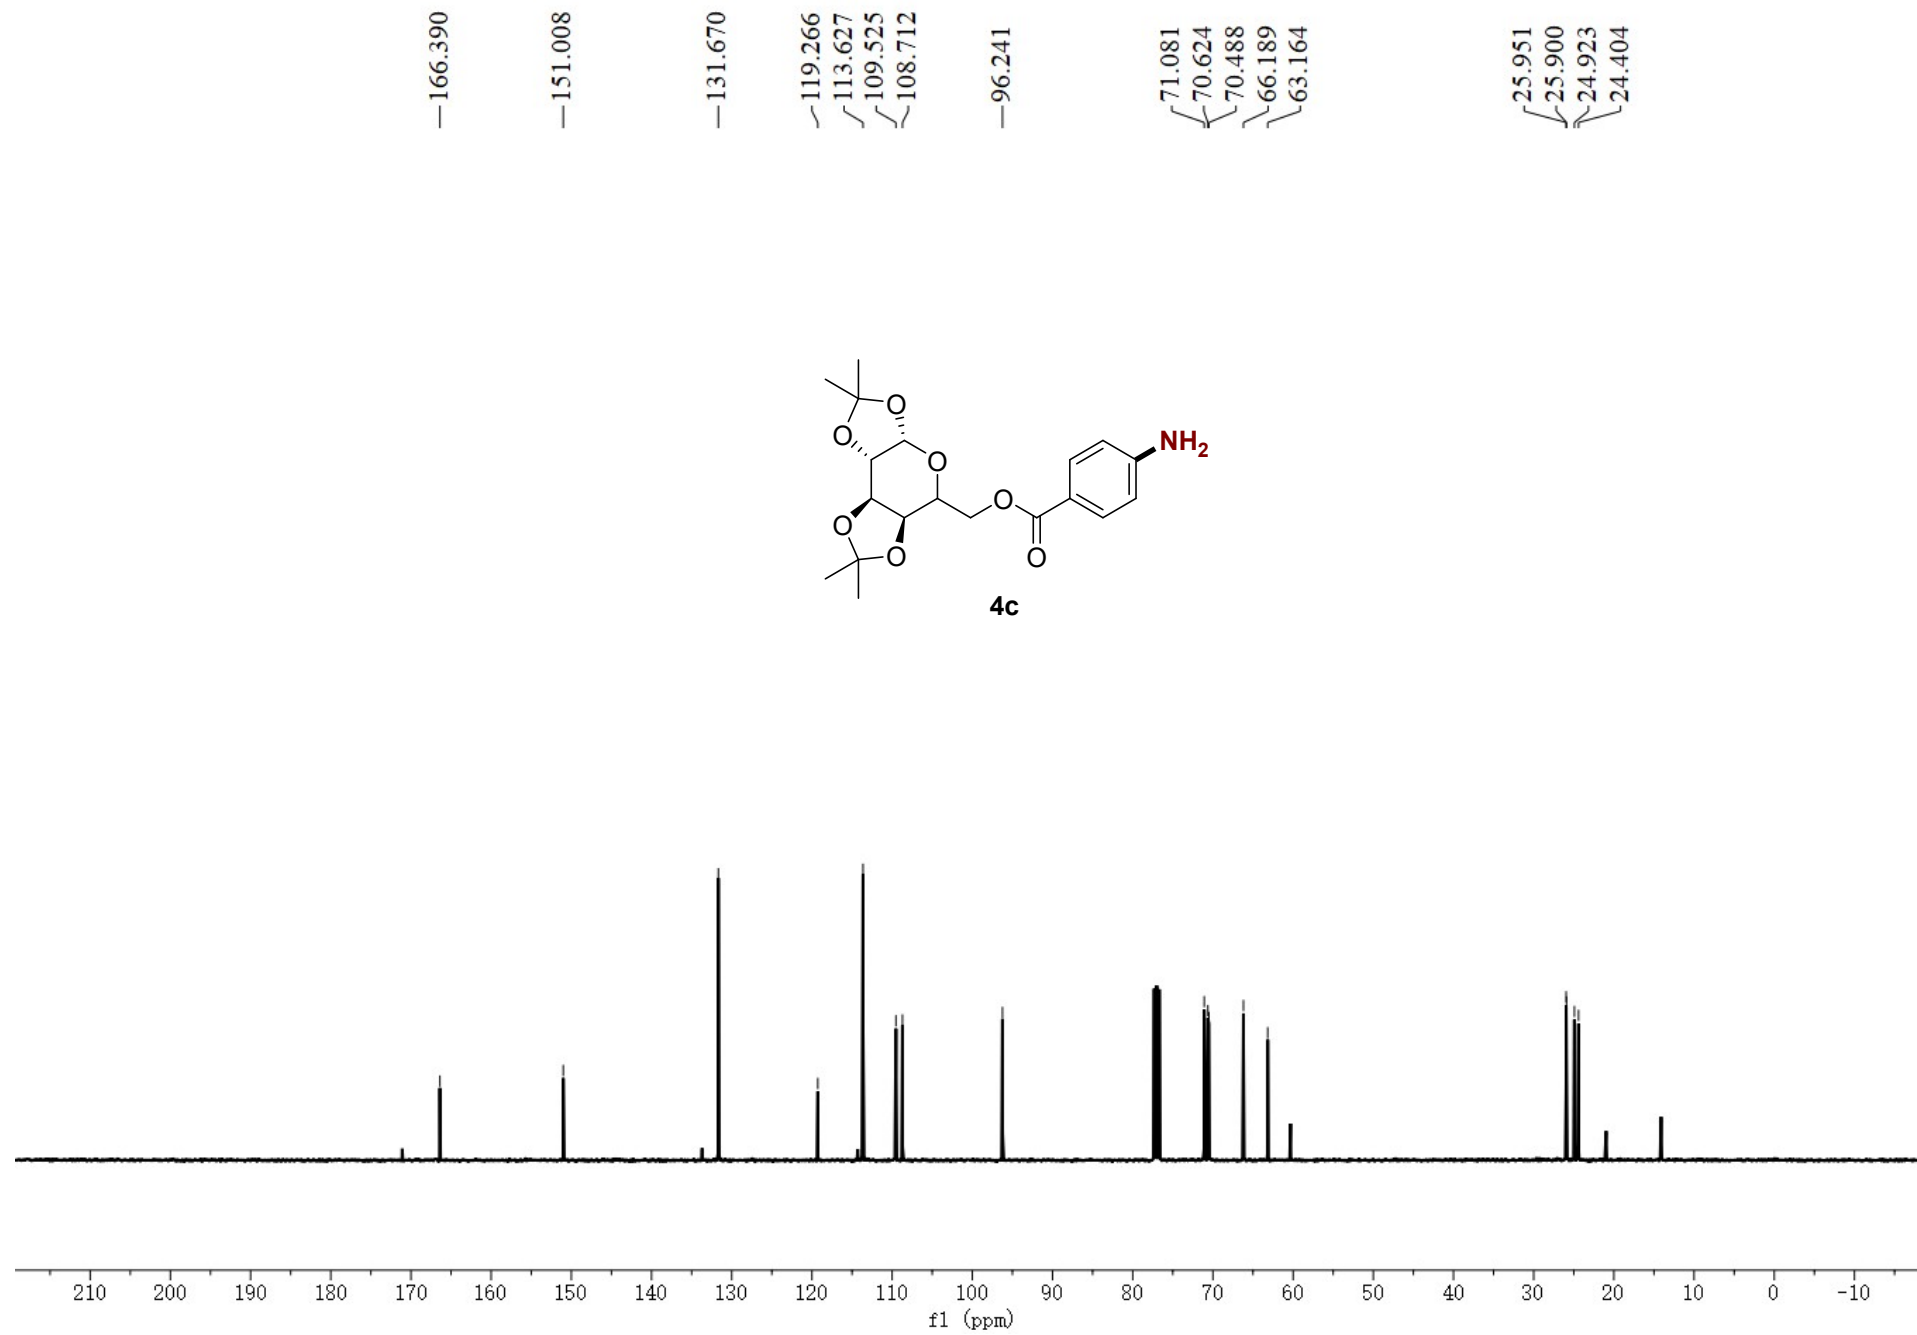

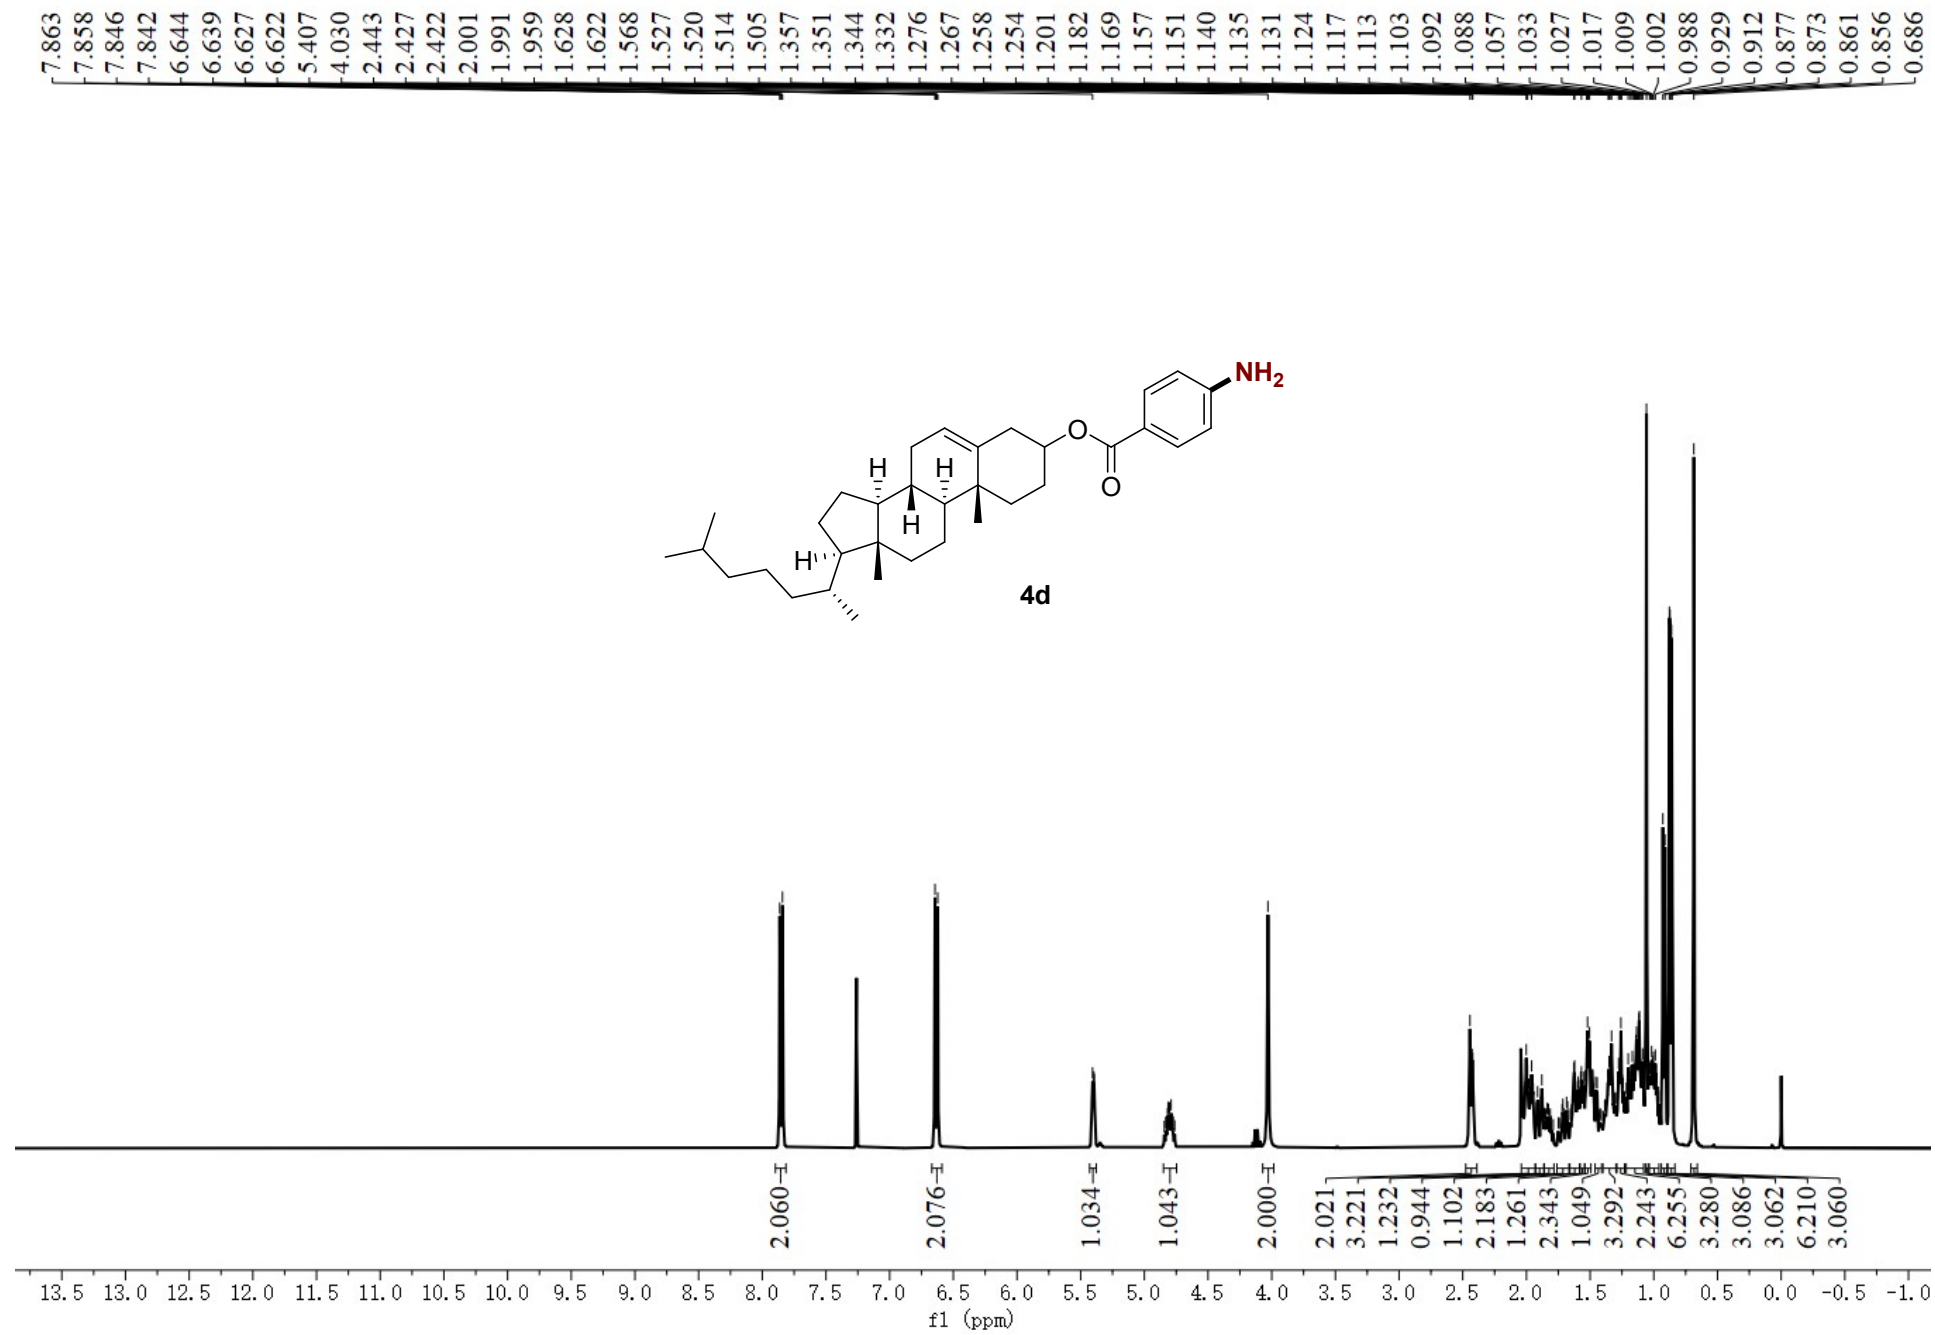

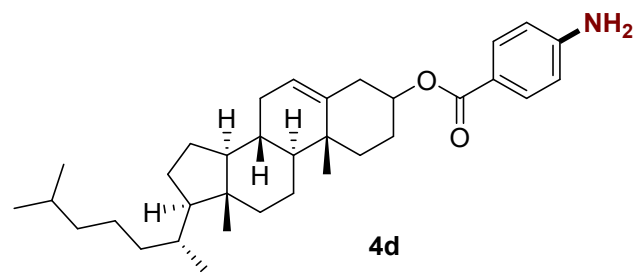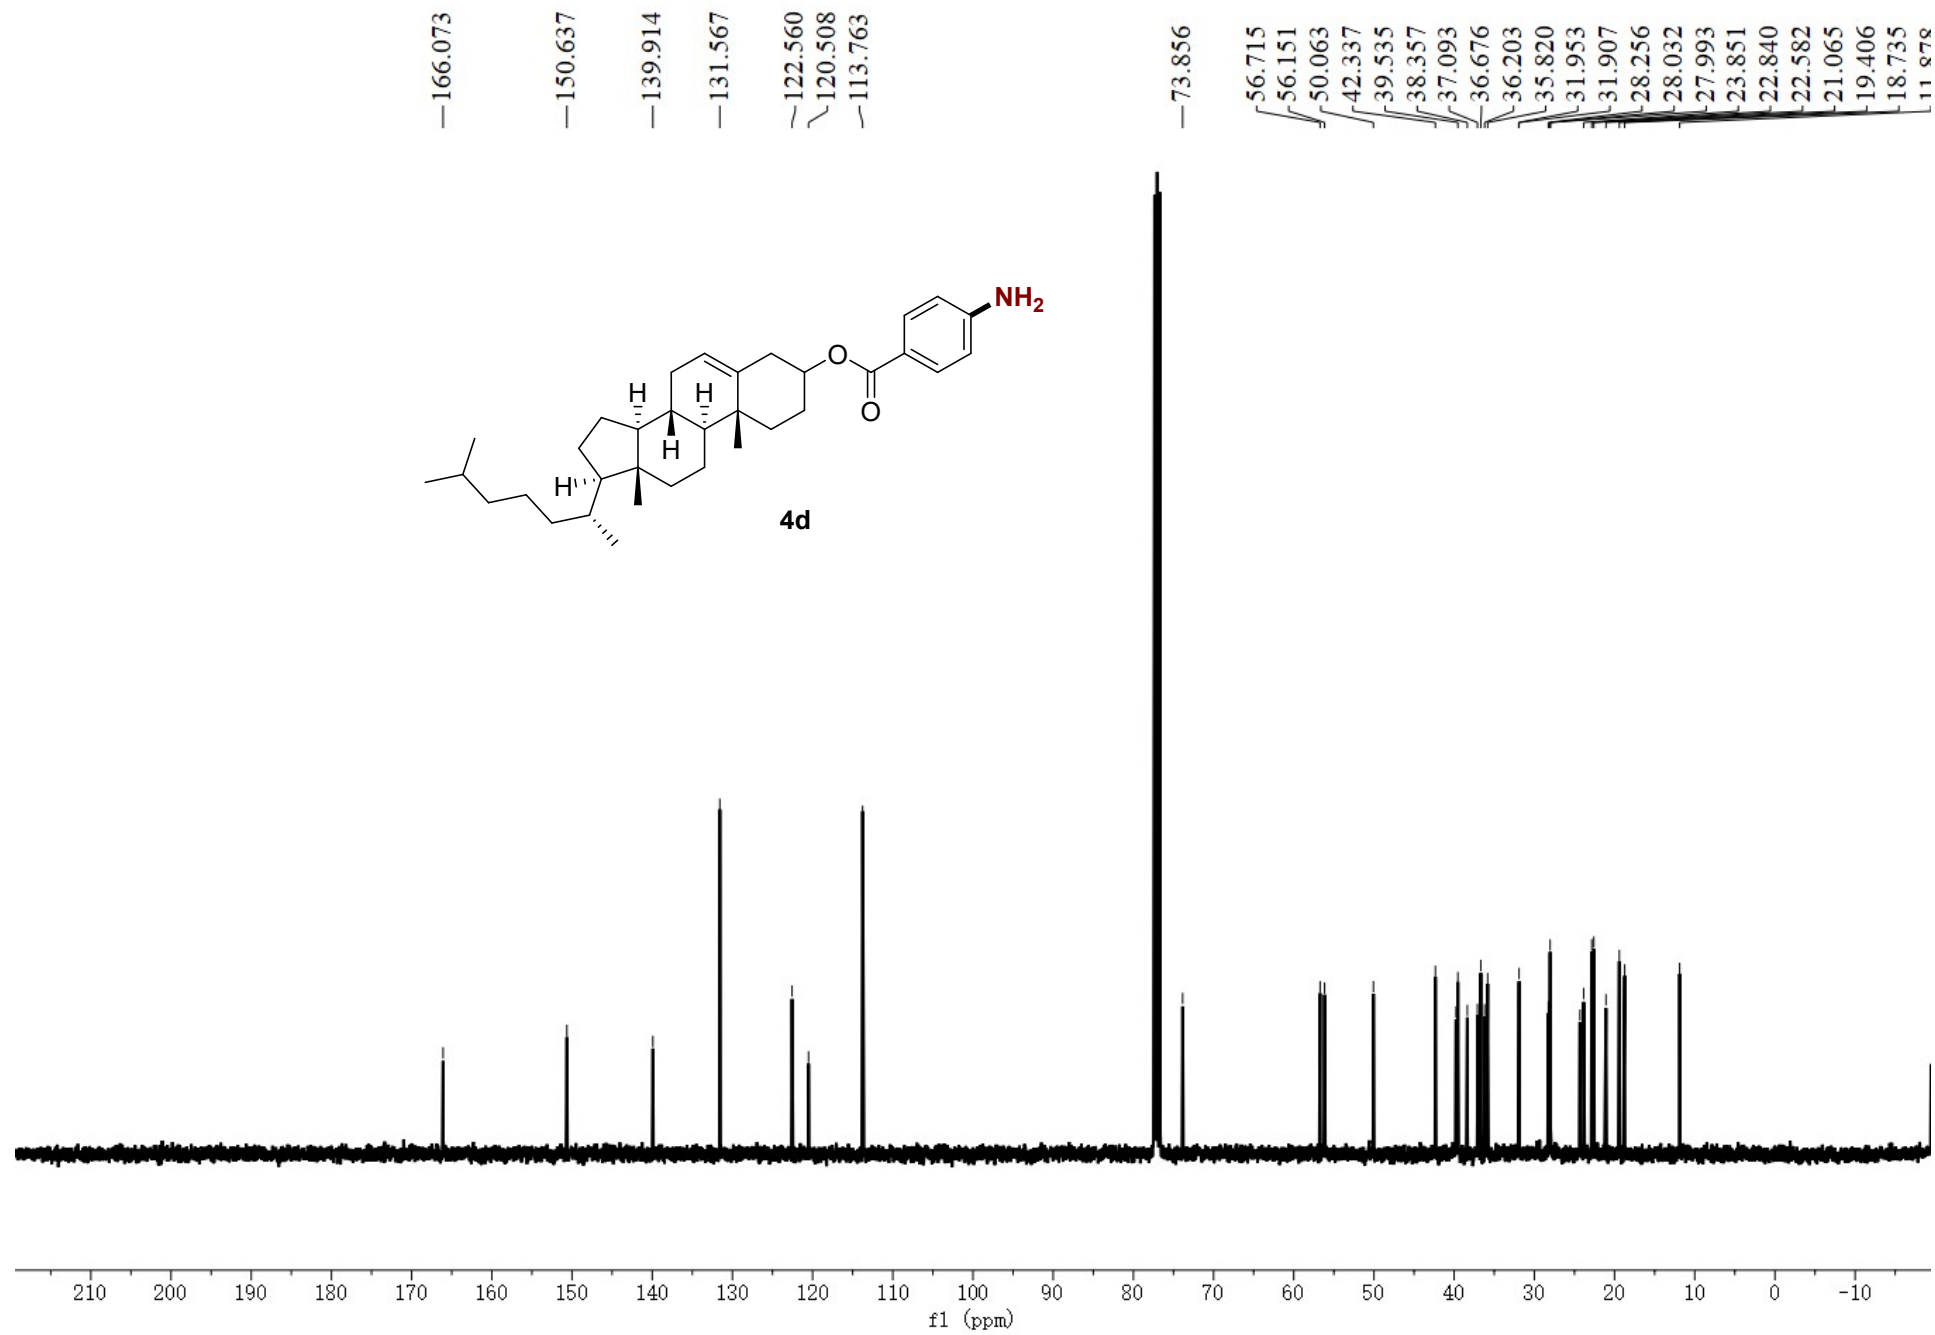

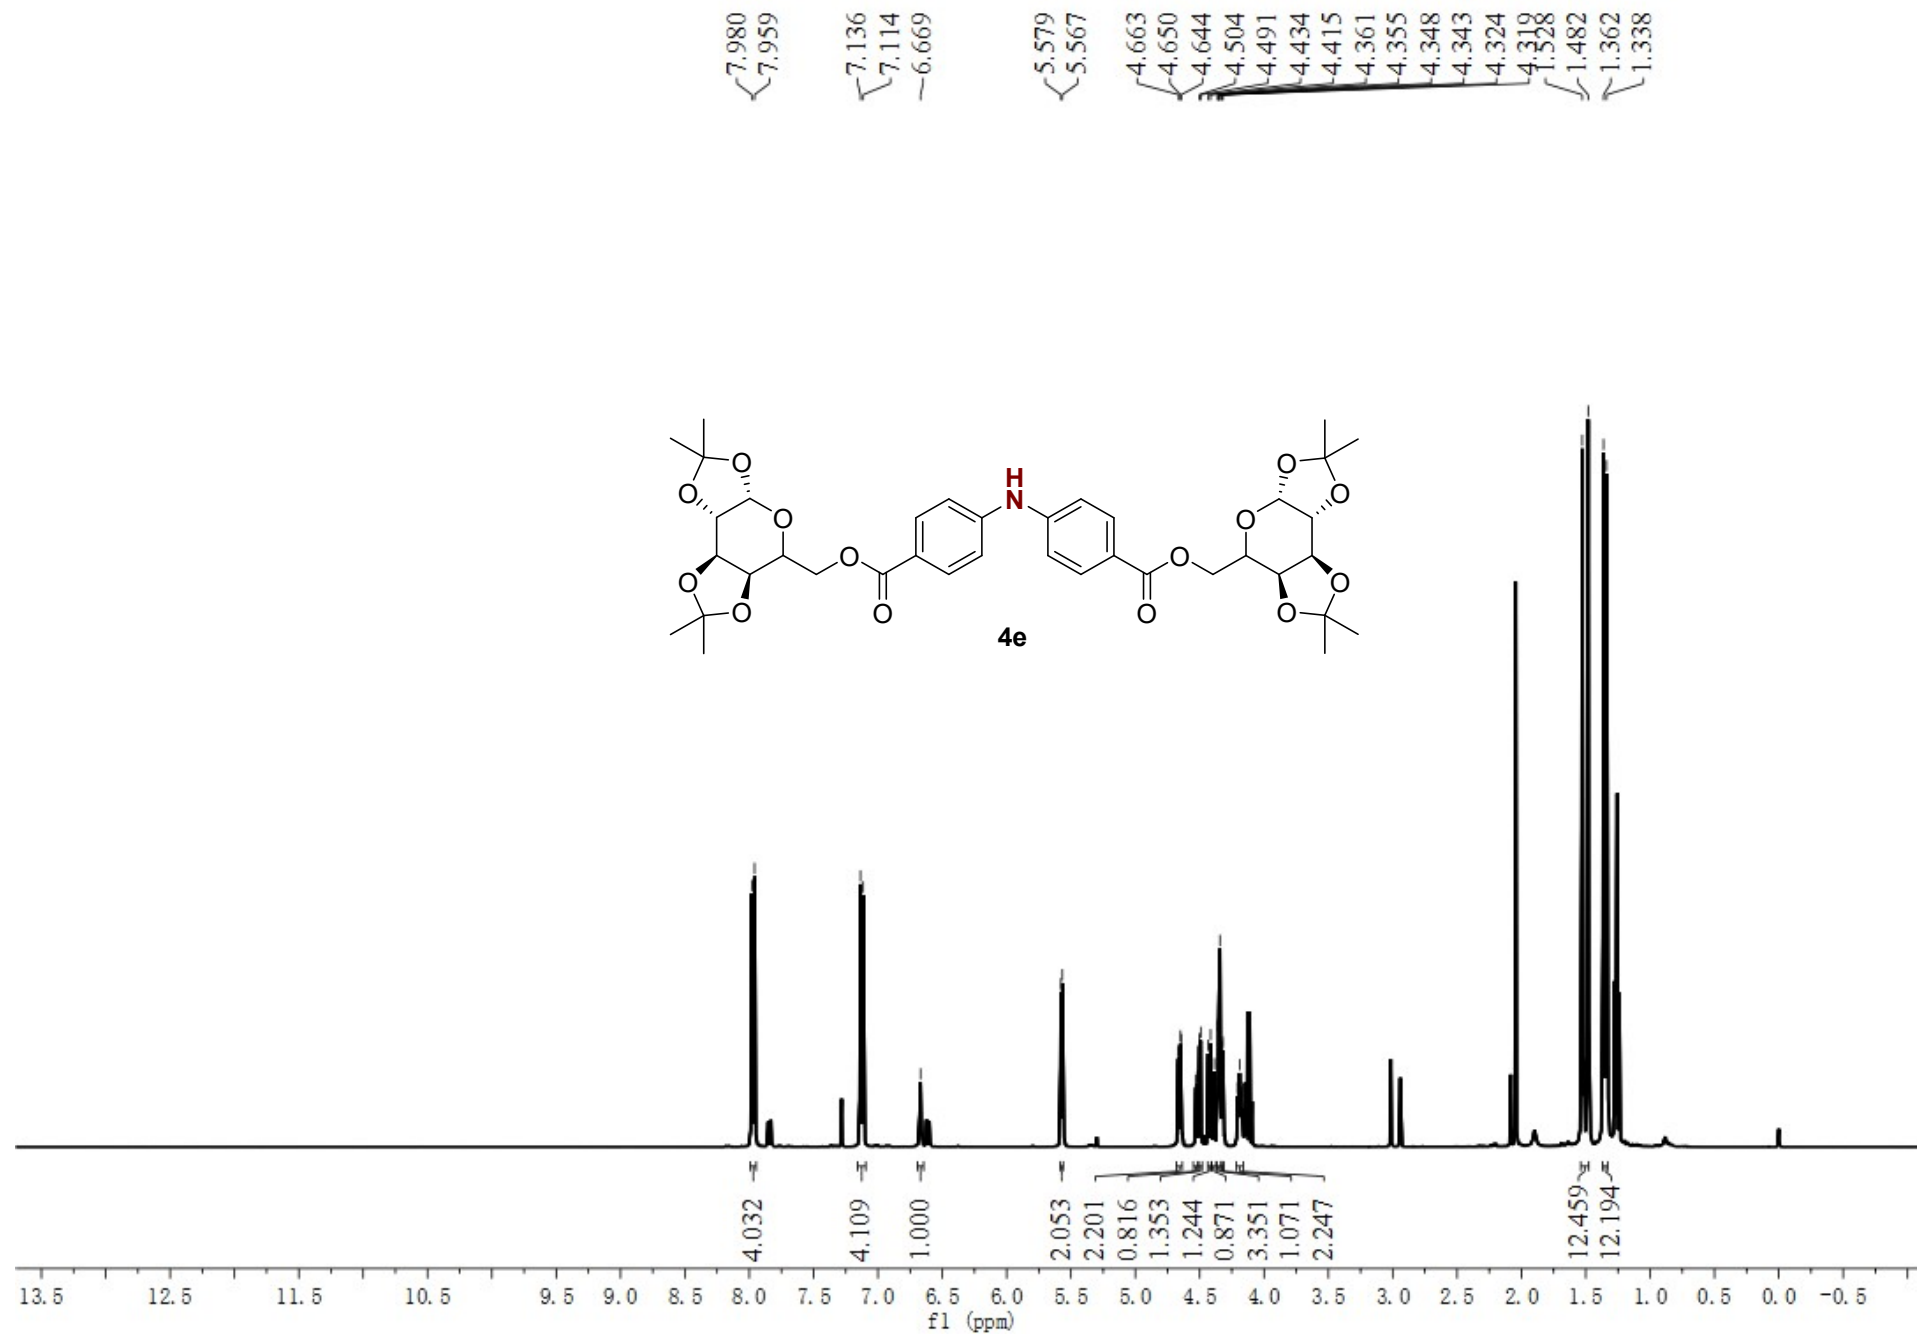

—166.056

—146.029

—131.553

~122.754

~116.851

~109.674

~108.819

—96.331

71.167

70.725

70.548

66.253

63.651

26.049

25.987

24.994

24.491

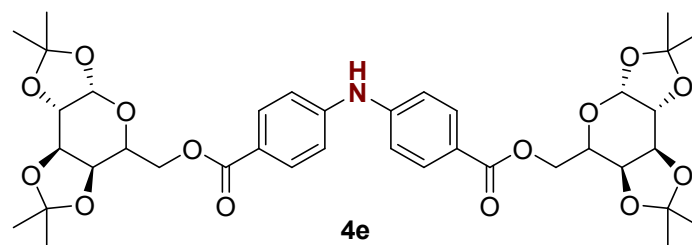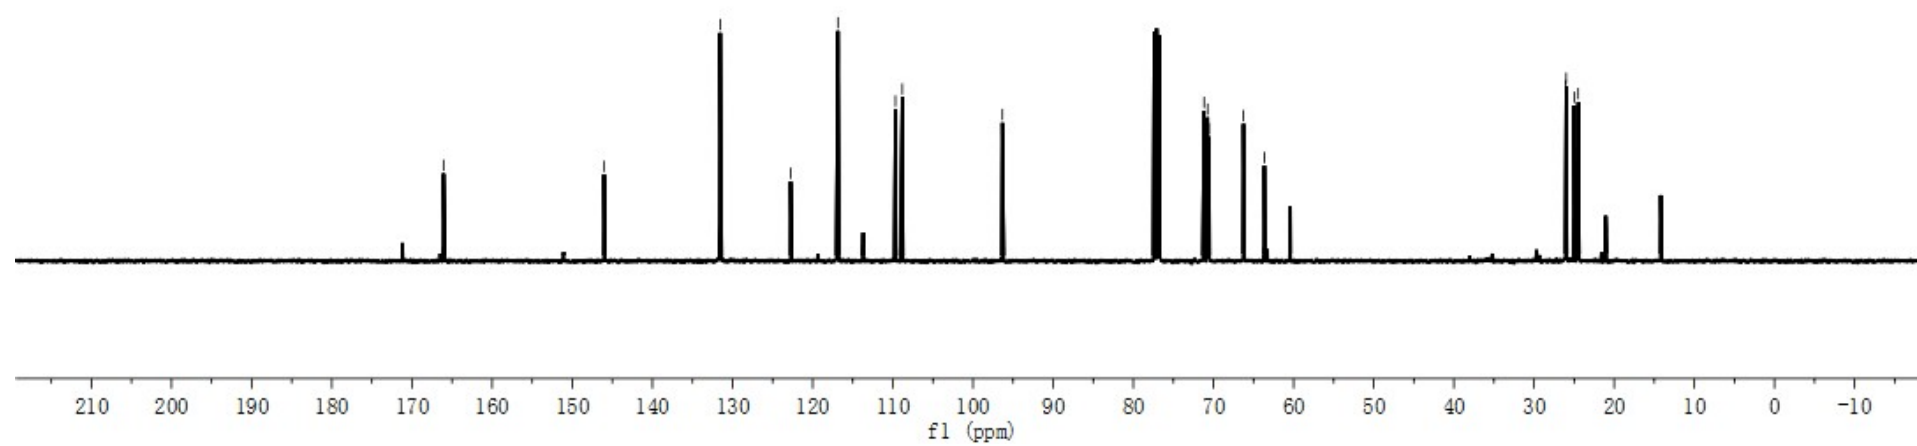

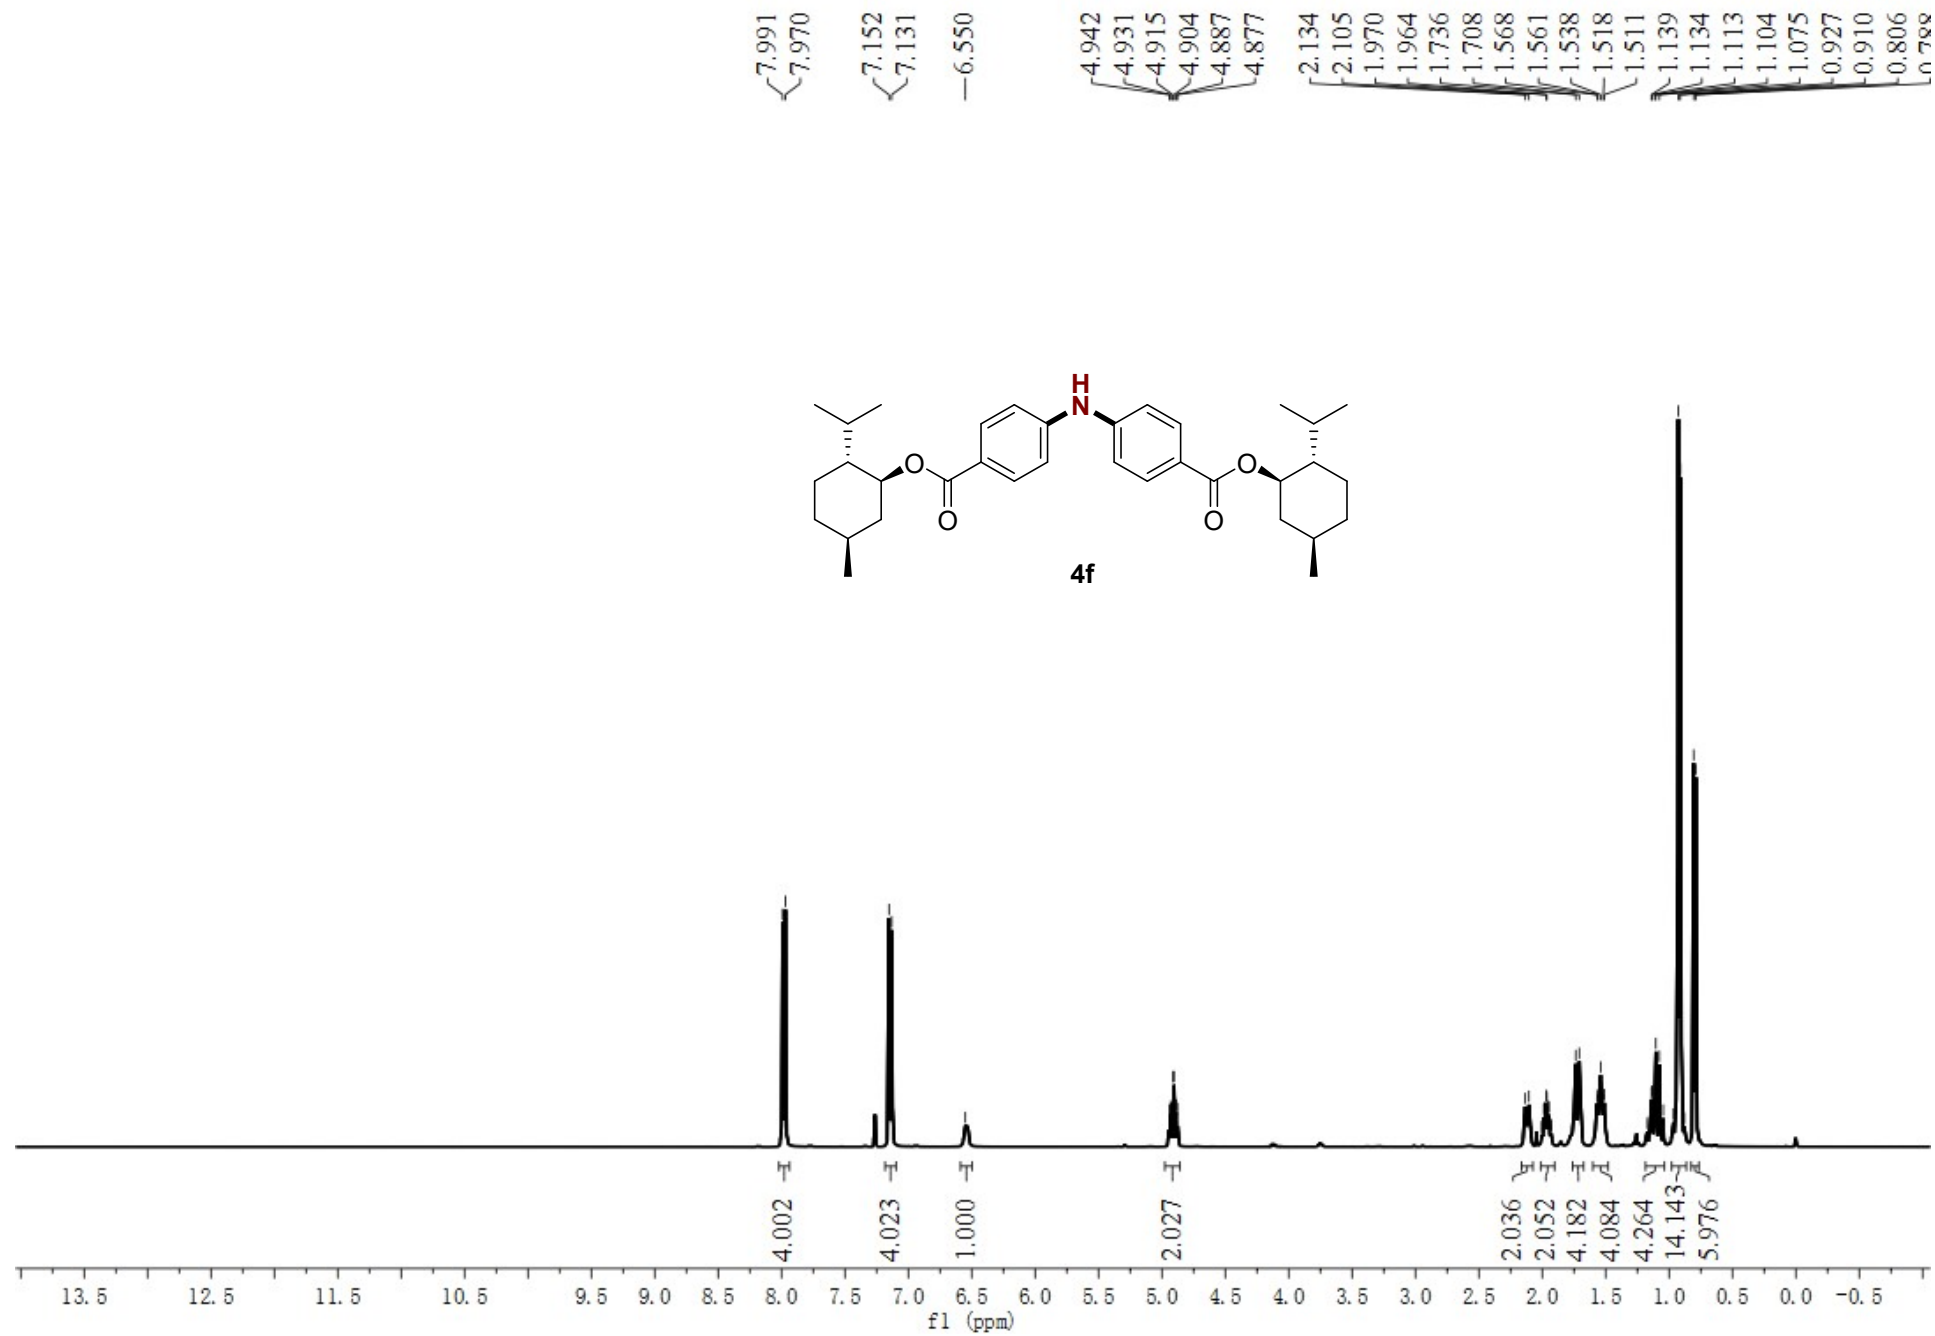

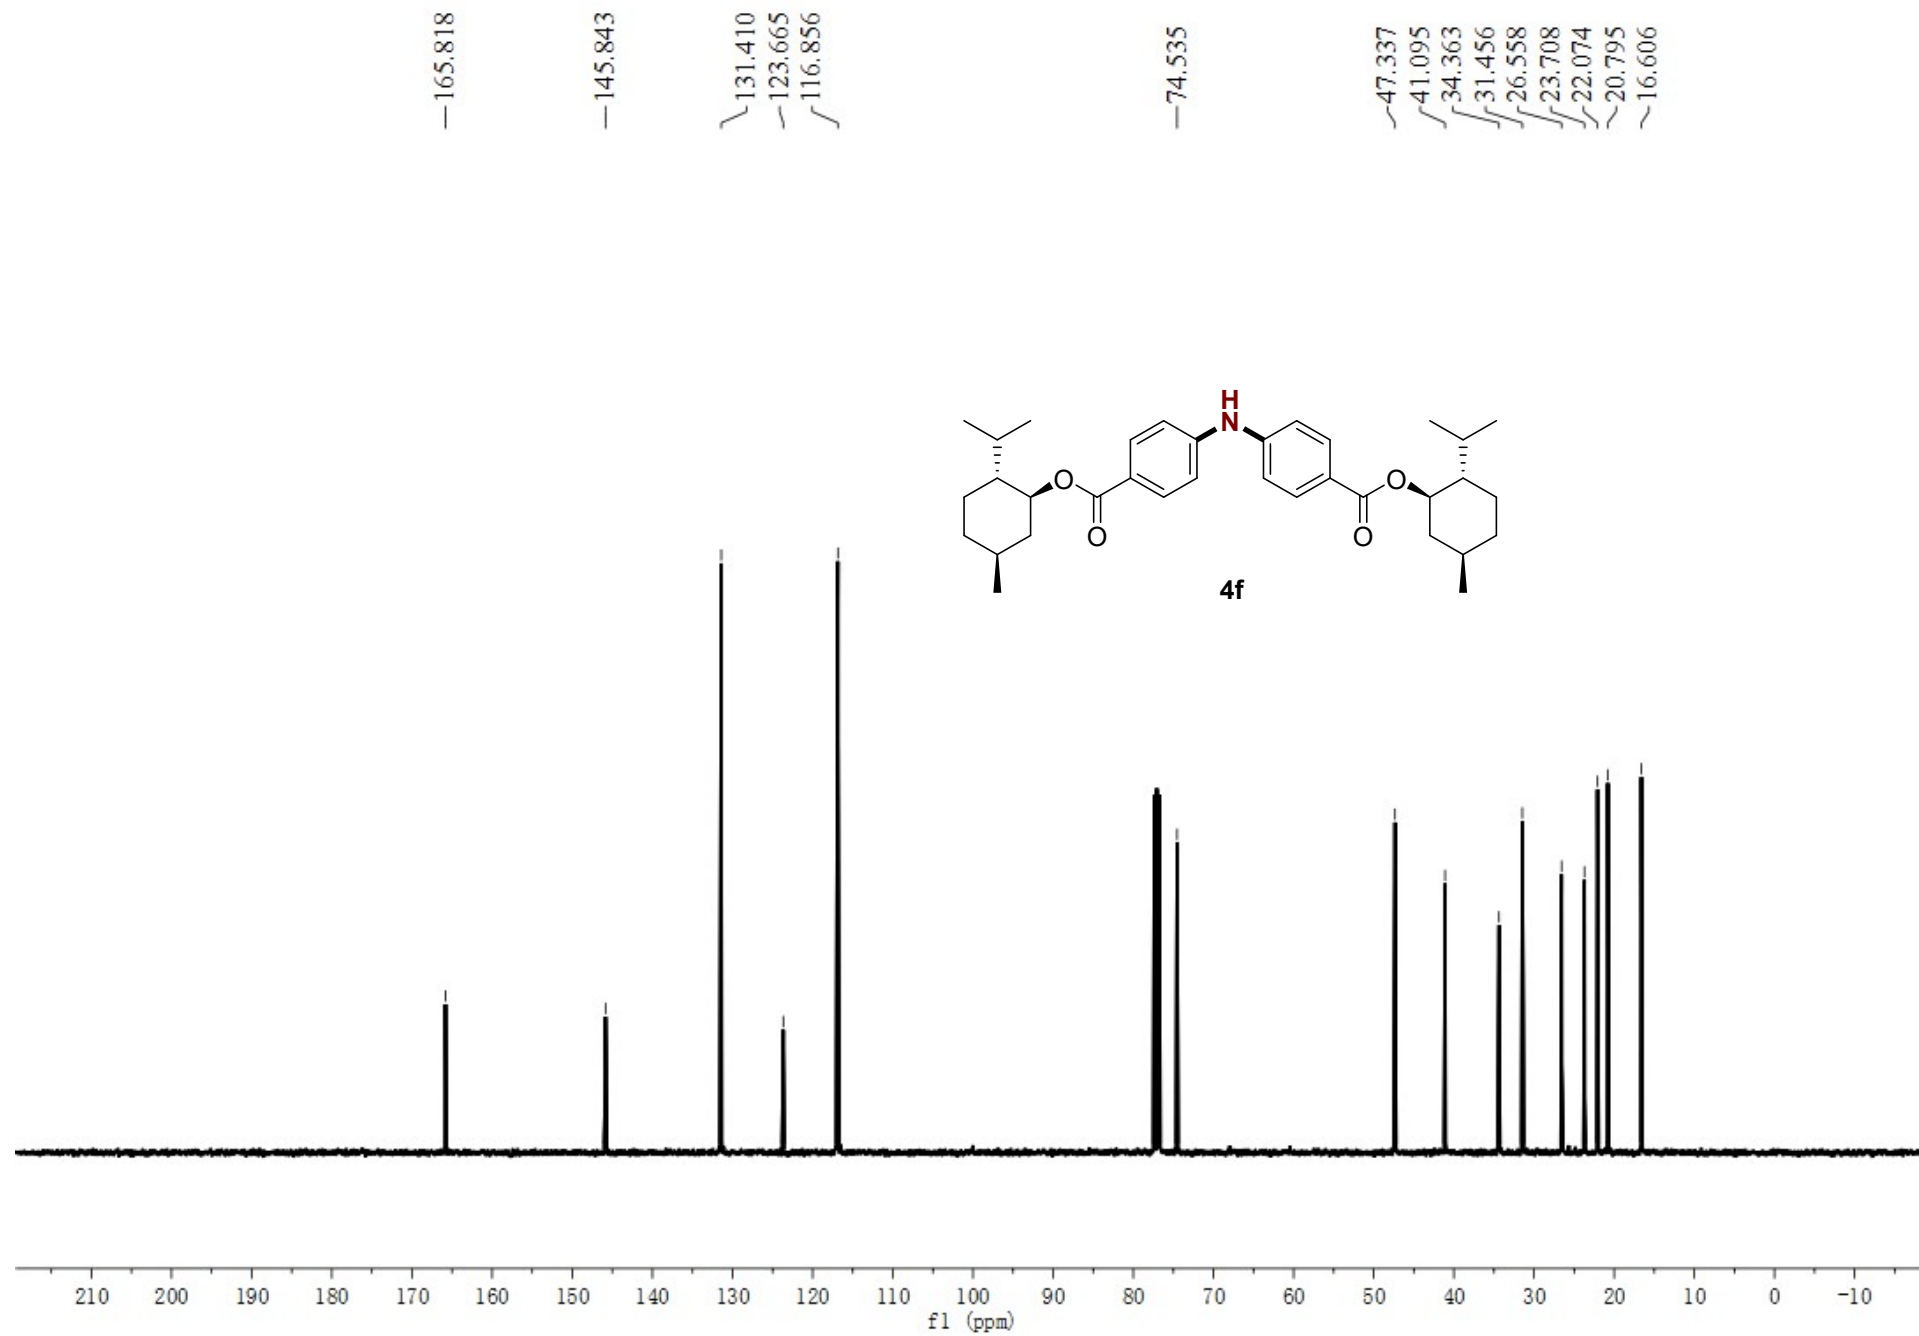

6.899  
6.891  
6.886  
6.875  
6.869  
6.861  
6.814  
6.806  
6.800  
6.789  
6.784  
6.775

4.268  
4.250  
4.232  
4.214

1.550  
1.299  
1.282  
1.264

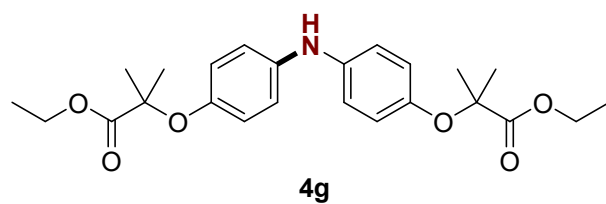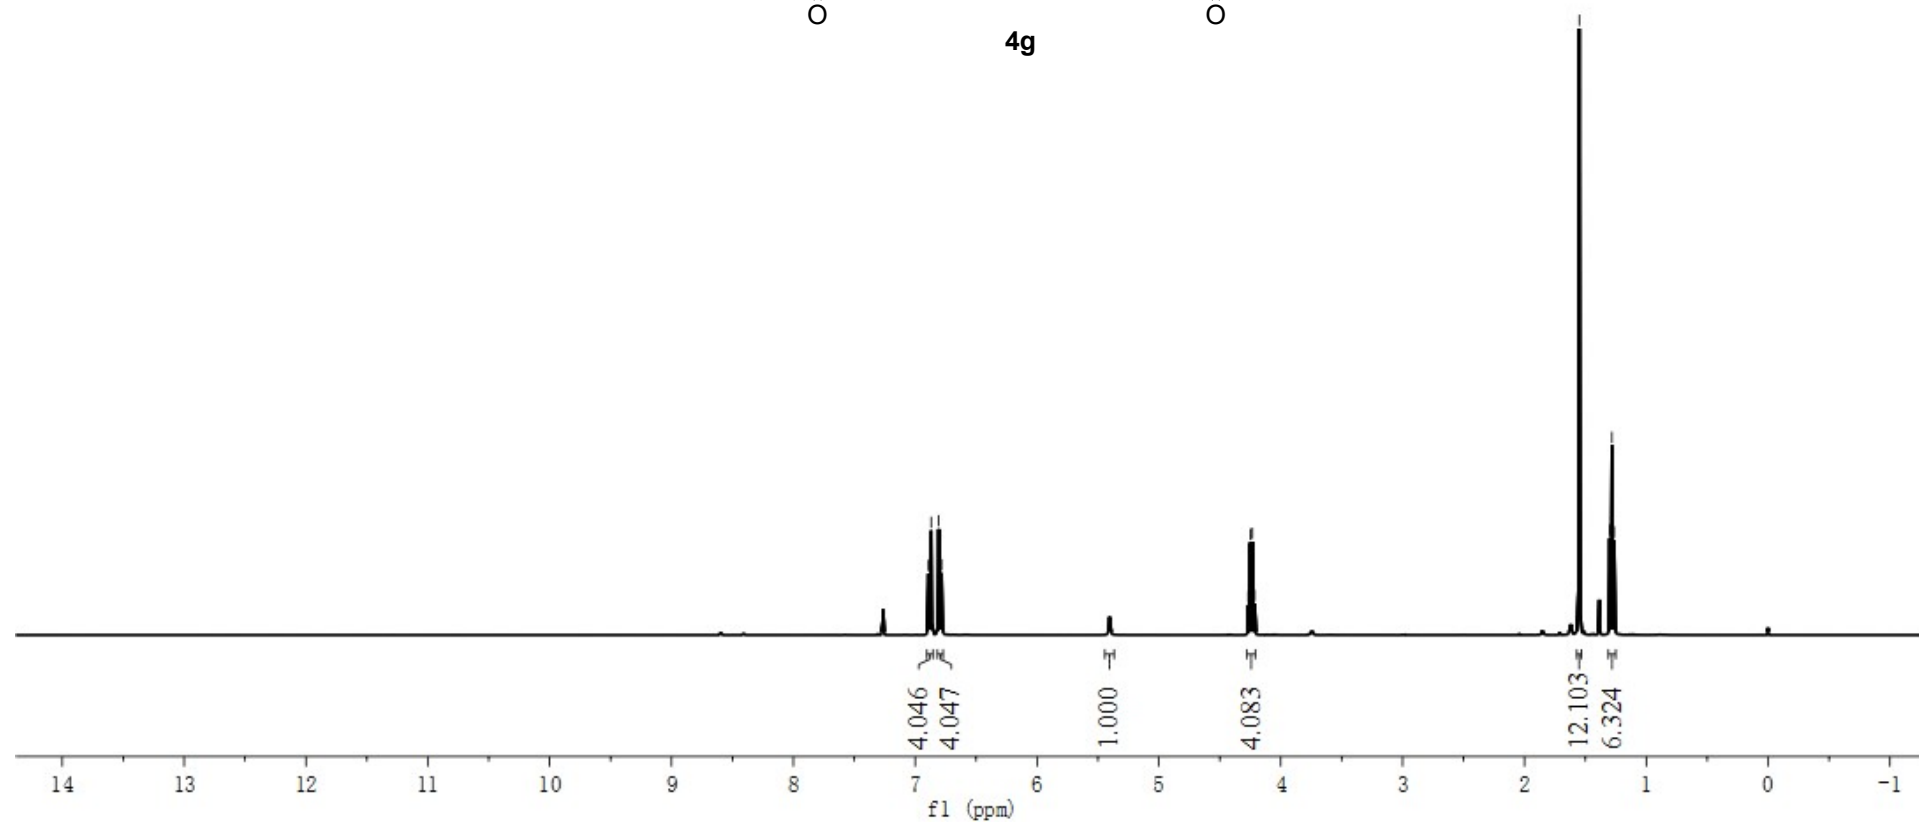

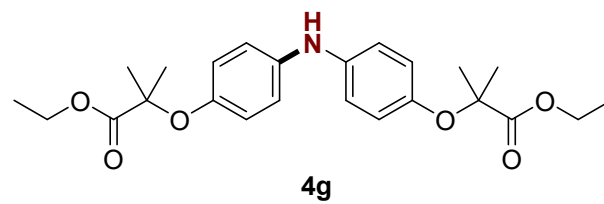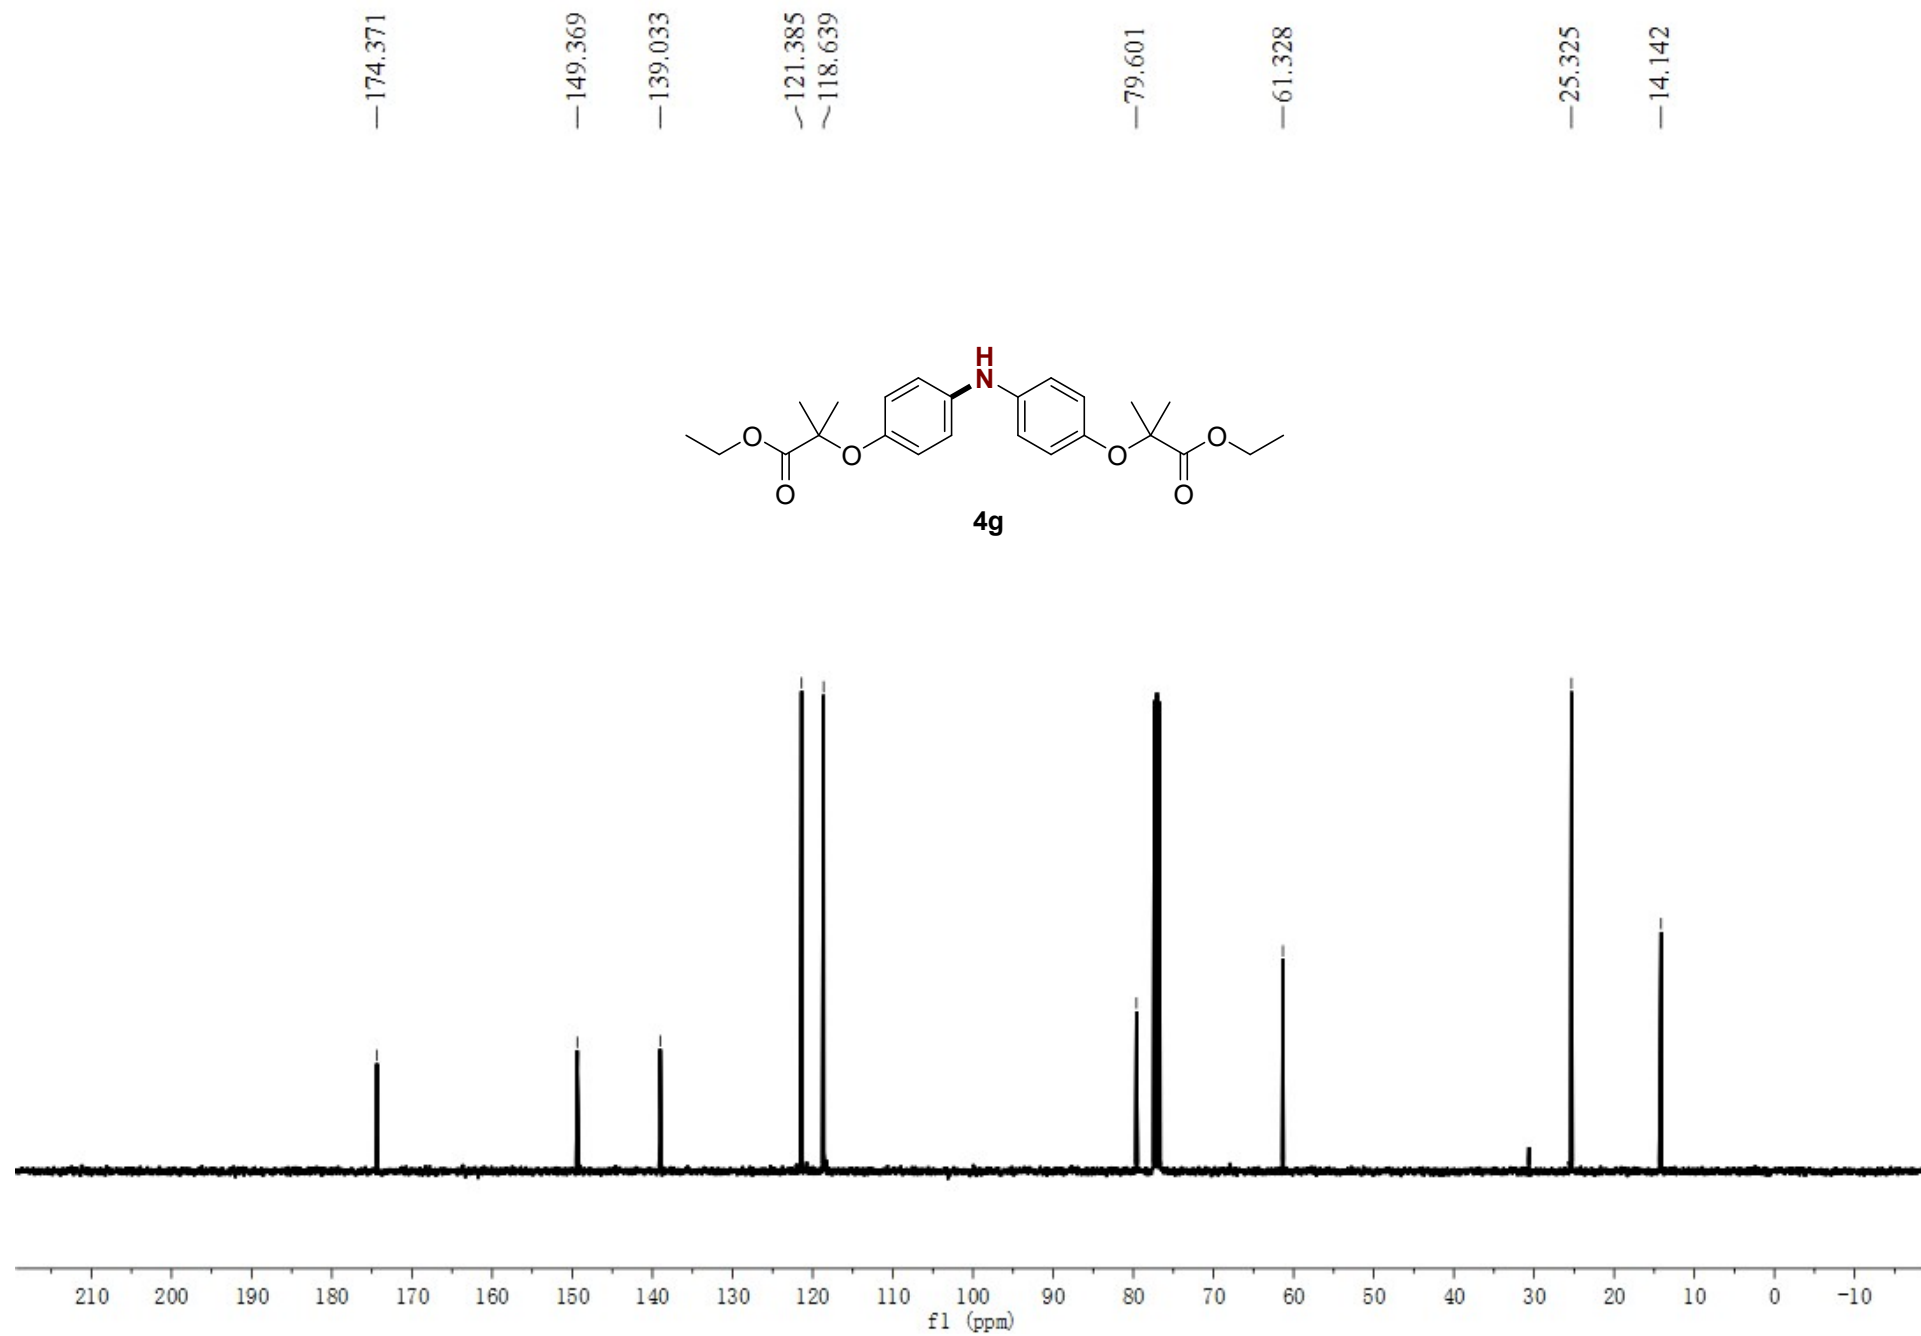

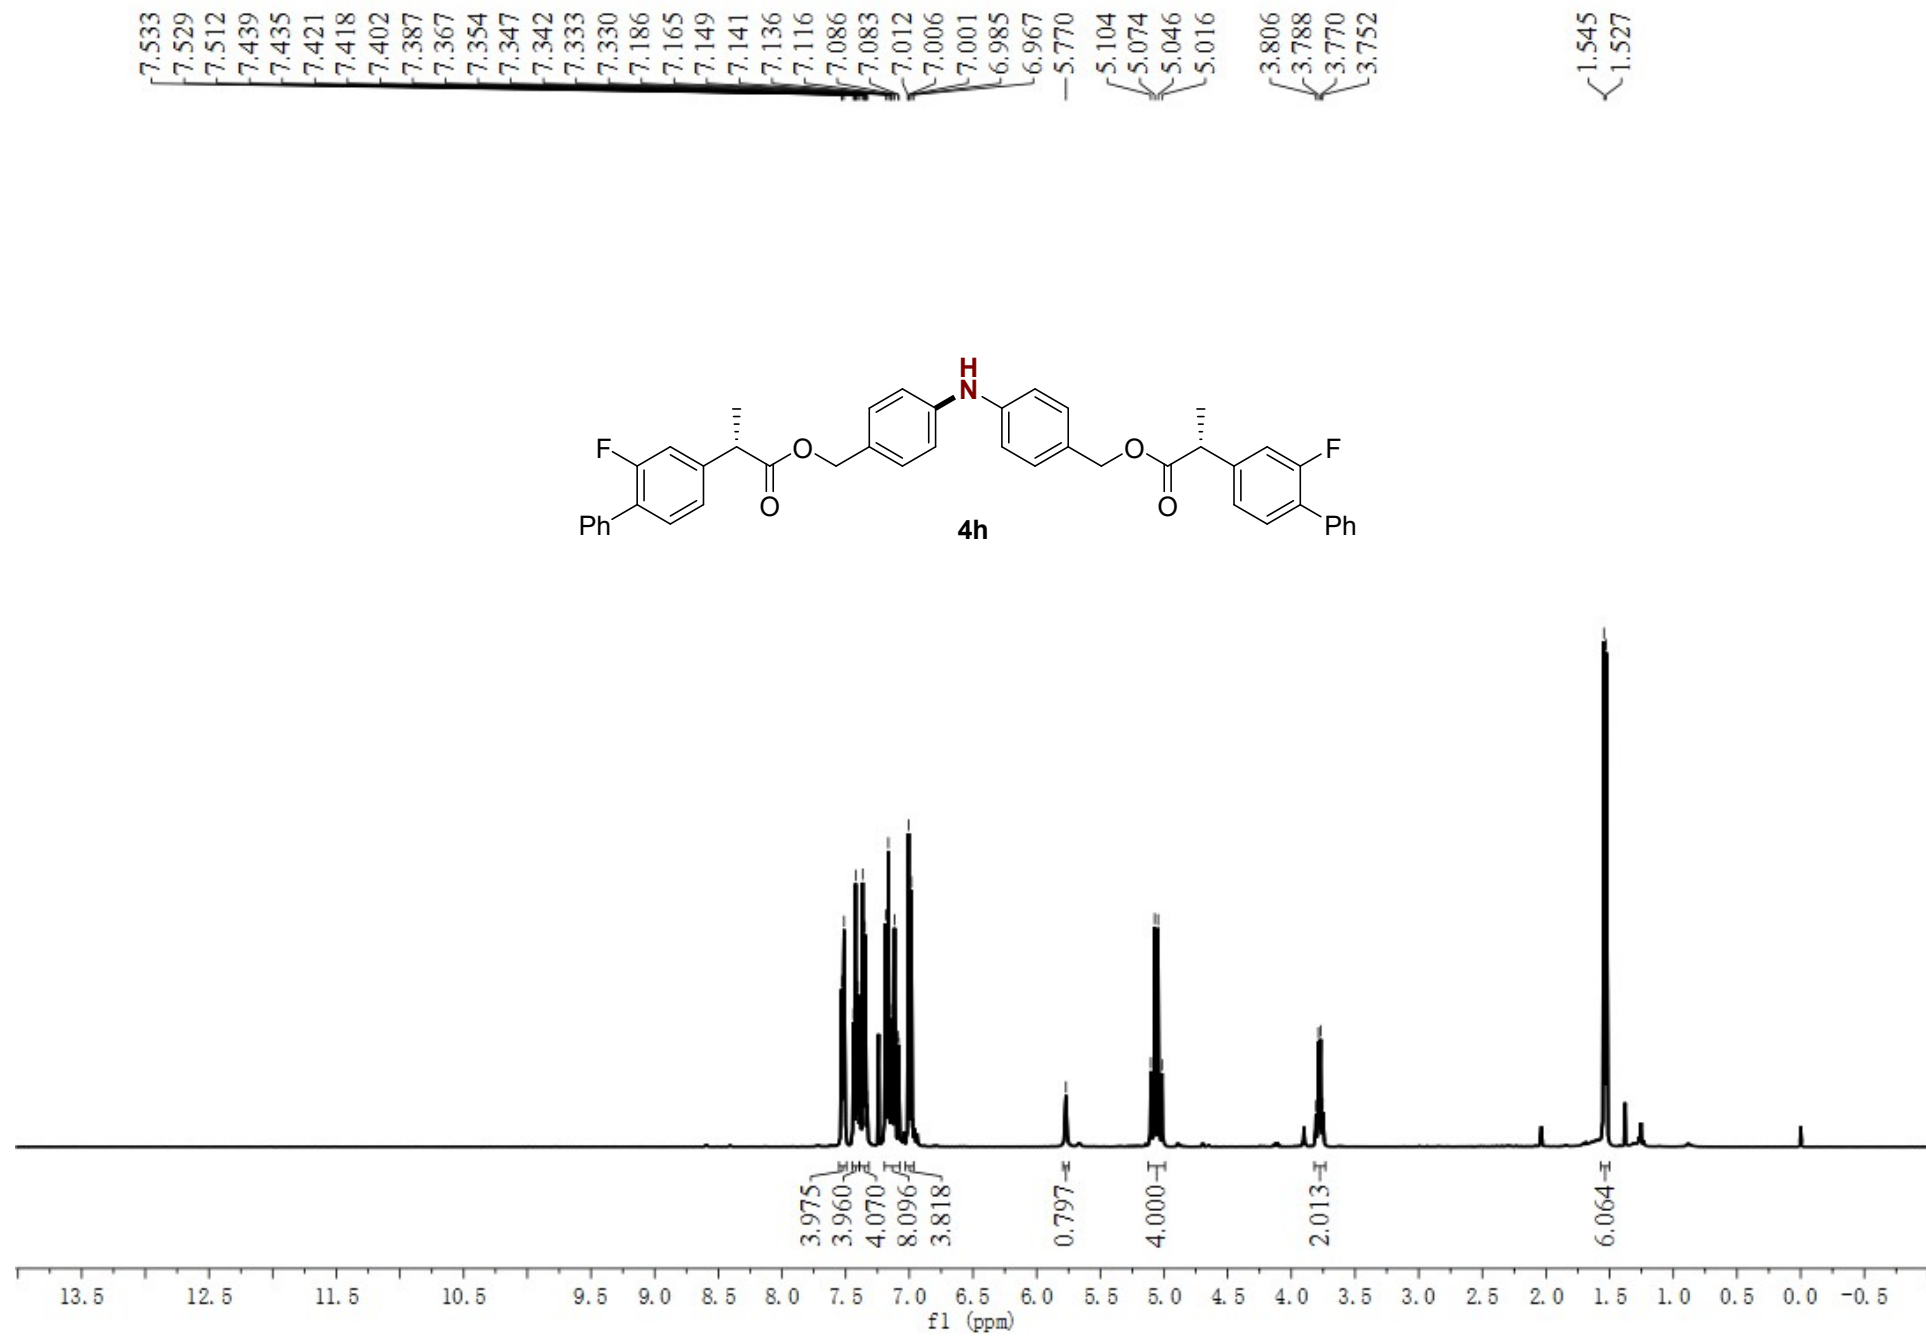

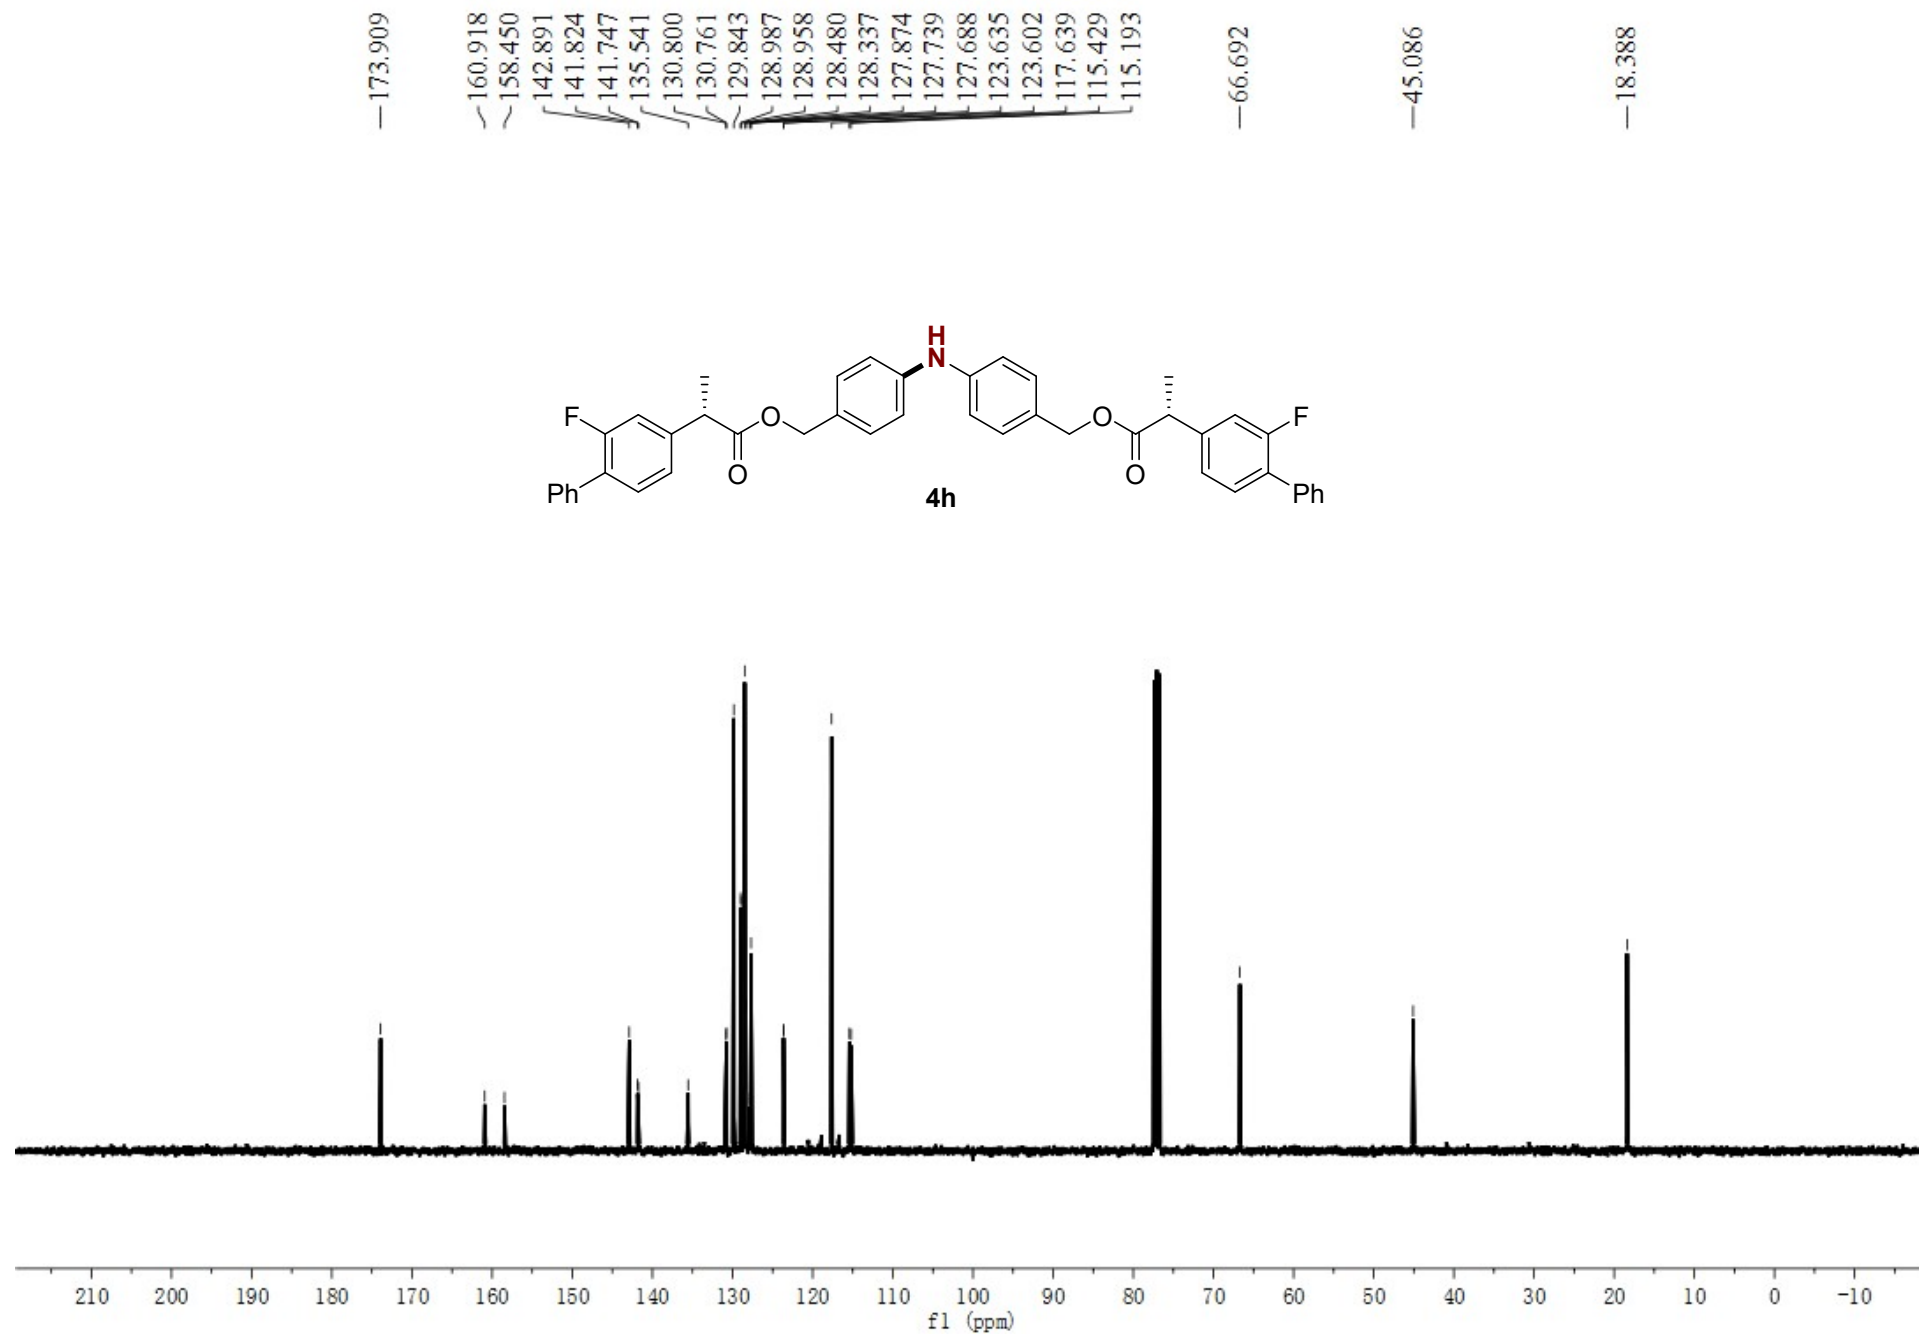

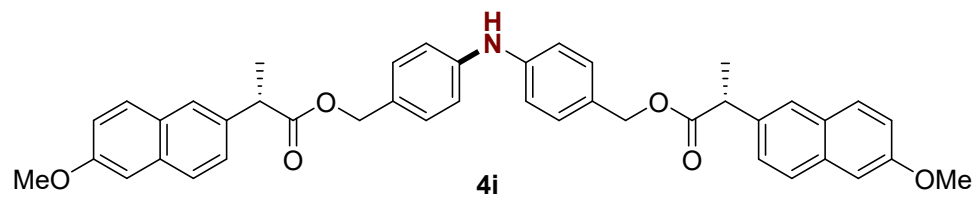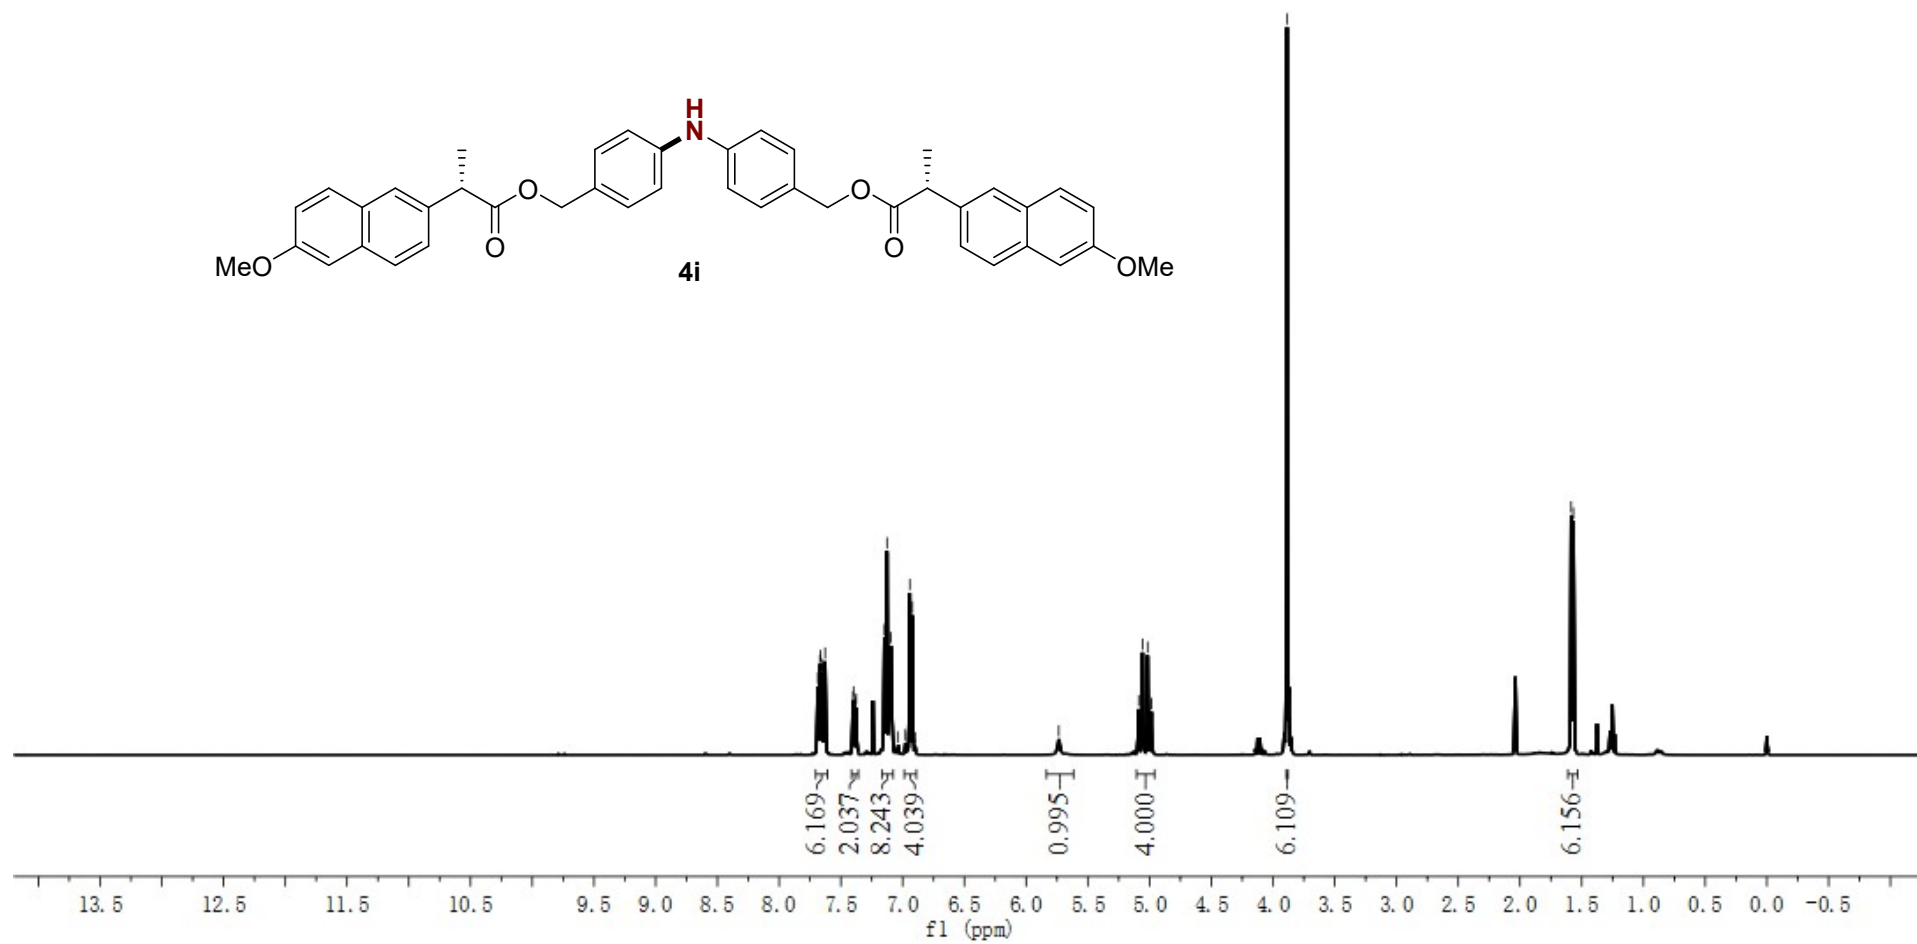

—174.610  
 —157.634  
 135.660  
 133.698  
 129.742  
 129.316  
 128.941  
 128.501  
 127.130  
 126.340  
 125.996  
 118.962  
 117.588  
 105.888  
 —66.463  
 —55.316  
 —45.510  
 —18.598

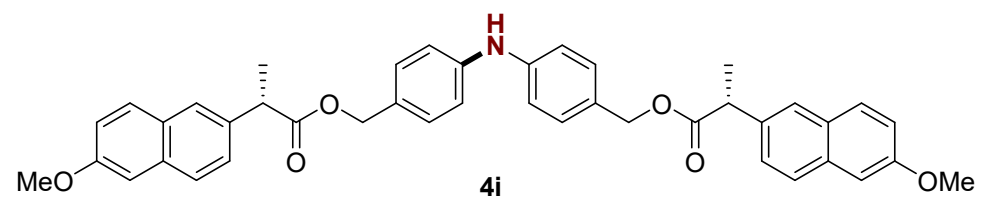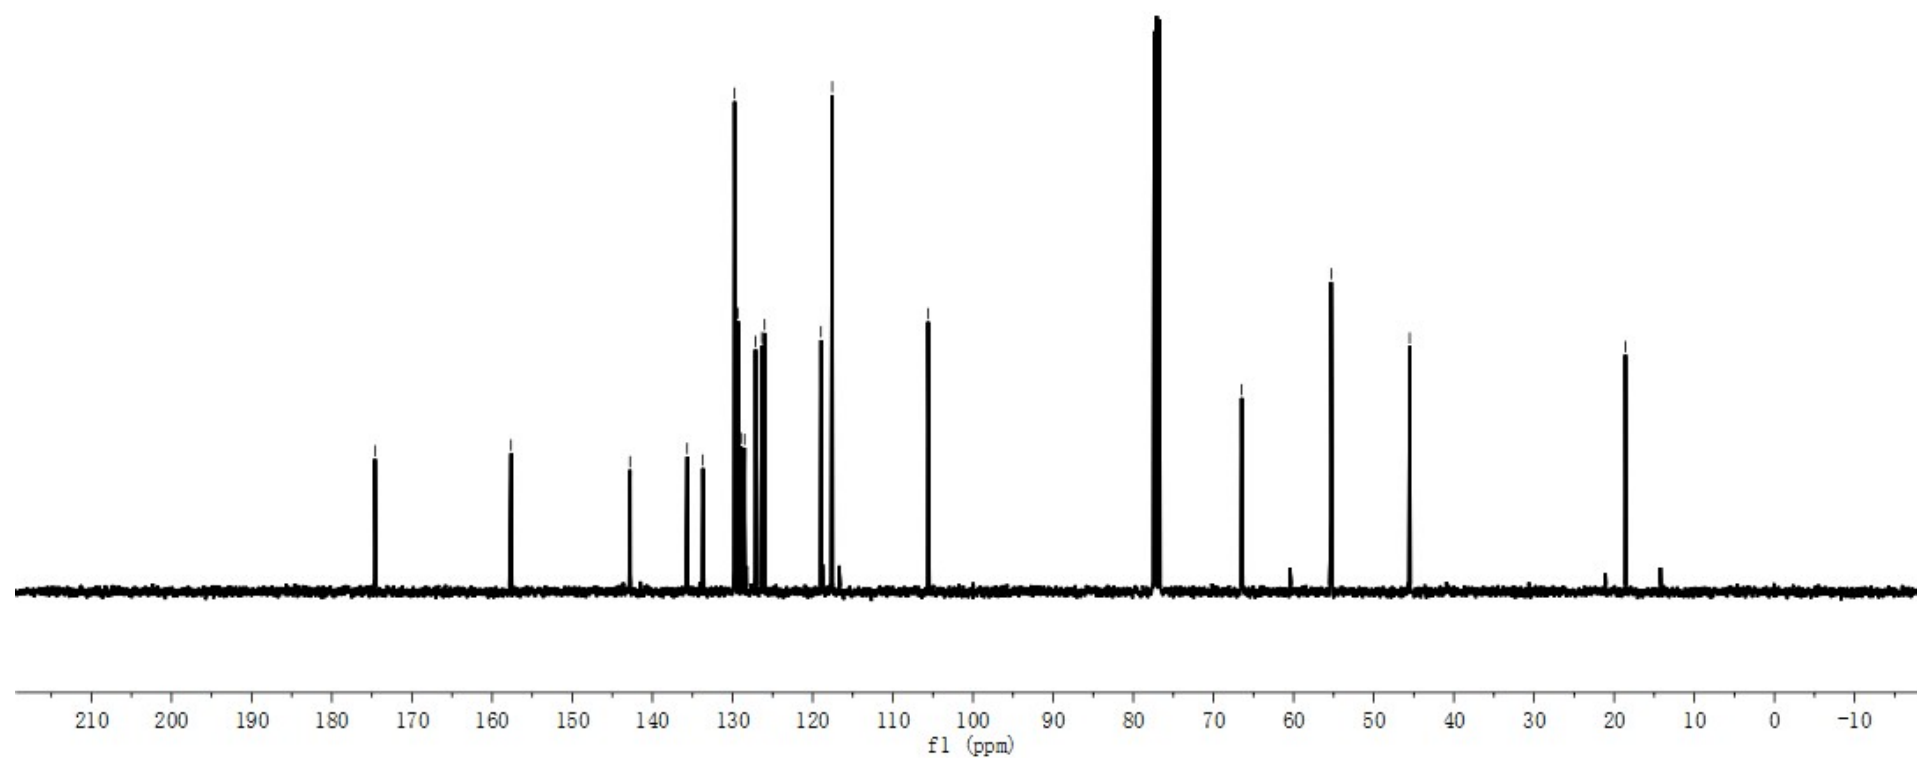

Supplement: d4gc06307d1.pdf [file d4gc06307d1.pdf]
